# Supplementary material
Source: publisher site journal article supplement (https://www.spandidos-publications.com/7578/downloadSupplementary)
Supplement: Supplementary file 1 [file downloadSupplementary]

## Sheet: Table SX
Table SX. Results of GO functional enrichment analysis.
ONTOLOGY	ID	Description	GeneRatio	BgRatio	P-value	p.adjust	qvalue	geneID	Count
BP	GO:0002440	production of molecular mediator of immune response	146/2932	333/18903	1.77956e-35	1.10849e-31	9.09449e-32	MYD88/CCR6/IL10/CD40LG/GATA3/LILRB4/BATF/CD96/B2M/IL18/JAK3/MAD2L2/CD28/FFAR3/XRCC4/BST2/TNFSF13/ARG1/TGFB3/FFAR2/CD55/PYCARD/IL18R1/TRAV9-2/UBE2J1/CGAS/IL4R/BCL6/IRAK3/CR1/HLA-A/ARID5A/CYREN/ANGPT1/LILRB1/RABGEF1/FCRL3/IL1B/KIT/HMOX1/SLC7A5/RBP4/FCGR2B/TRAV19/TGFB1/HLA-DOA/TRIM6/LITAF/TRAV2/PRG2/APOA2/NOD2/RSAD2/TLR4/IGKV3-7/IGKV3D-7/IL1R1/KIR2DL4/CD22/IGLV2-33/TRAV38-2DV8/IGKV3D-20/GPRC5B/EXO1/…	146
BP	GO:0006959	humoral immune response	136/2932	320/18903	2.12659e-31	6.62327e-28	5.434e-28	S100A9/S100A12/GAPDH/CCR6/C1QC/BST1/C1QB/GATA3/H2BC21/H2BC12/CD59/SLPI/C1QA/BCL2/CD28/CR2/TFE3/PGLYRP1/ALOX5/CAMP/FCN1/CD55/C2/H2BC6/CLU/C1RL/VSIG4/SLC11A1/GPR183/CR1/BCL3/HLA-A/SUSD4/BMI1/ROMO1/SERPING1/CFB/ANG/PPBP/CFP/FCN2/LTF/H2BC8/H2BC12L/IL1B/CR1L/FCGR2B/ACOD1/TFEB/RNASE3/DEFA3/CXCL10/C1R/CCR7/H2BC4/NOD2/DEFB1/PSMB10/PF4/H2BC11/EXO1/IGHV6-1/MS4A1/CTSG/ELANE/IGHG1/H2BC7/DEFA1B/C4B/C4A/PRTN3/…	136
BP	GO:0002377	immunoglobulin production	106/2932	219/18903	1.50635e-30	2.53128e-27	2.07677e-27	CCR6/IL10/CD40LG/BATF/B2M/MAD2L2/CD28/XRCC4/TNFSF13/TRAV9-2/CGAS/IL4R/BCL6/CR1/CYREN/FCRL3/RBP4/FCGR2B/TRAV19/TGFB1/HLA-DOA/TRAV2/IGKV3-7/IGKV3D-7/CD22/IGLV2-33/TRAV38-2DV8/IGKV3D-20/EXO1/IGKV1-12/IGKV1D-12/IGLV3-21/MZB1/IGLV3-27/IGLV3-10/NBN/IGKV1D-17/IGLV2-23/IGKV1D-13/IGLV1-36/IGKV1-13/IGKV2D-24/IGKV3D-15/IGKV1D-39/IGLV2-11/POLQ/IGLV2-14/IGKV3D-11/IGLV3-22/IGKV1-39/IGKV2D-29/IGKV1D-33/IGKV3-15…	106
BP	GO:0042742	defense response to bacterium	151/2932	382/18903	1.62548e-30	2.53128e-27	2.07677e-27	S100A9/FCGR1A/ANXA3/S100A8/IL7R/S100A12/HP/MYD88/HMGB2/IL10/FCER1G/NLRC4/TLR5/H2BC21/CASP4/H2BC12/CLEC4D/IL18/SLPI/RNASE1/FGR/NAIP/PLAC8/SIGLEC16/GRN/PRKCD/CEBPB/PGLYRP1/CYBA/CLEC4E/CAMP/EMILIN2/PYCARD/H2BC6/SLC11A1/STAB1/BCL3/RBCK1/GBP2/HLA-A/LCN2/BPI/OAS1/ROMO1/ADAMTS5/TLR2/TNFRSF1A/MARCHF2/GSDMD/ANG/PPBP/CFP/FCN2/ISG15/MIR223/LTF/H2BC8/H2BC12L/IL1B/TFEB/RNASE3/GBP6/DEFA3/PRG2/H2BC4/FPR2/NOD2/D…	151
BP	GO:0006958	complement activation, classical pathway	67/2932	106/18903	8.51932e-29	1.06134e-25	8.70764e-26	C1QC/C1QB/C1QA/CR2/CD55/C2/CLU/C1RL/CR1/SUSD4/SERPING1/CR1L/C1R/IGHV6-1/IGHG1/C4B/C4A/IGHD/IGHV3-72/IGHG4/IGLL5/IGLC2/IGLC1/IGLC6/IGHV2-70D/IGHG3/IGKC/IGHV3-64/IGHV1-45/IGLC3/IGHV1-69/IGHA2/IGHV5-10-1/IGHV1-69D/IGHV1-18/C8B/IGHV1-24/IGHV3-33/IGHV2-70/IGHV3-74/IGHV3-23/IGHV3-30/IGHG2/IGHV3-64D/IGHA1/IGHV3-21/IGHV3-20/IGHV4-39/IGHV3-16/IGHV3-9/IGHV1-69-2/IGHV5-51/IGLC7/IGHV3-49/IGHV1-58/IGHV3-73/IG…	67
BP	GO:0002460	adaptive immune response based on somatic recombination of immune receptors built from immunoglobulin superfamily domains	146/2932	375/18903	1.02995e-28	1.06926e-25	8.77269e-26	FCGR1A/LEF1/IL7R/MYD88/CCR6/C1QC/IL10/SCART1/FCER1G/CD40LG/C1QB/GATA3/BACH2/LILRB4/BATF/ANXA1/B2M/IL18/RORA/C1QA/IL27/JAK3/CTSH/CEACAM1/MAD2L2/CD28/CR2/FADD/TNFSF13B/NECTIN2/PRKCD/TNFSF13/ARG1/SEMA4A/FUT7/PLA2G4A/JUNB/IRF7/CD55/C2/ZBTB7B/CLU/C1RL/IL18R1/SLC11A1/IL4R/BCL6/IL17RA/CD274/CR1/BCL3/HLA-A/ARID5A/RORC/SUSD4/CLEC6A/ICAM1/SERPING1/ZC3H12A/TCIRG1/LILRB1/HLA-H/IL1B/CR1L/RELB/FCGR2B/ENTPD7/TG…	146
BP	GO:0006956	complement activation	76/2932	132/18903	1.26485e-28	1.12554e-25	9.23438e-26	C1QC/C1QB/CD59/C1QA/CR2/FCN1/CD55/C2/CLU/C1RL/VSIG4/CR1/SUSD4/SERPING1/CFB/CFP/FCN2/IL1B/CR1L/C1R/IGHV6-1/IGHG1/C4B/C4A/CFD/IGHD/IGHV3-72/IGHG4/IGLL5/IGLC2/IGLC1/IGLC6/IGHV2-70D/IGHG3/IGKC/IGHV3-64/IGHV1-45/IGLC3/IGHV1-69/IGHA2/IGHV5-10-1/IGHV1-69D/IGHV1-18/C8B/IGHV1-24/KRT1/IGHV3-33/IGHV2-70/IGHV3-74/IGHV3-23/IGHV3-30/IGHG2/IGHV3-64D/IGHA1/IGHV3-21/IGHV3-20/IGHV4-39/IGHV3-16/IGHV3-9/IGHV1-69-2/I…	76
BP	GO:0002455	humoral immune response mediated by circulating immunoglobulin	71/2932	119/18903	3.62301e-28	2.82097e-25	2.31444e-25	C1QC/C1QB/C1QA/CR2/CD55/C2/CLU/C1RL/CR1/BCL3/SUSD4/SERPING1/CR1L/FCGR2B/C1R/NOD2/EXO1/IGHV6-1/IGHG1/C4B/C4A/IGHD/IGHV3-72/IGHG4/IGLL5/IGLC2/IGLC1/IGLC6/IGHV2-70D/IGHG3/IGKC/IGHV3-64/IGHV1-45/IGLC3/IGHV1-69/IGHA2/IGHV5-10-1/IGHV1-69D/IGHV1-18/C8B/IGHV1-24/IGHV3-33/IGHV2-70/IGHV3-74/IGHV3-23/IGHV3-30/IGHG2/IGHV3-64D/IGHA1/IGHV3-21/IGHV3-20/IGHV4-39/IGHV3-16/IGHV3-9/IGHV1-69-2/IGHV5-51/IGLC7/IGHV3-4…	71
BP	GO:0006909	phagocytosis	122/2932	314/18903	4.36547e-24	3.02139e-21	2.47887e-21	FCGR1A/ANXA3/MYD88/FCER1G/ATG3/PLSCR1/RAB20/ANXA1/GAS6/SNX3/ITGAM/MARCO/FGR/LMAN2/AIF1/NCF4/DYSF/TYROBP/PRKCD/CD14/CYBA/FCN1/JMJD6/RHOG/HCK/IL15RA/PYCARD/C2/VAV1/CD300A/SLC11A1/SPHK1/RAC2/ICAM5/HAVCR1/TLR2/RAB31/TUB/CFP/FCN2/IL1B/RARA/PTX3/FCGR2B/GSN/MERTK/NR1H3/TGM2/SIRPA/CEBPE/APOA2/FPR2/NOD2/MYO7A/CEACAM4/TLR4/ADORA2A/PLD4/IGHV6-1/ELANE/IGHG1/SPACA3/P2RY6/MSR1/C4B/C4A/PRTN3/CCL2/IGHD/IGHV3-72/…	122
BP	GO:0002443	leukocyte mediated immunity	157/2932	463/18903	2.72217e-23	1.69564e-20	1.39117e-20	FCGR1A/ANXA3/IL7R/RASGRP1/MYD88/CCR6/C1QC/IL10/SCART1/FCER1G/CD177/CD40LG/C1QB/GATA3/MILR1/LILRB4/BATF/CD96/B2M/IL18/ITGAM/PRDX1/C1QA/JAK3/CTSH/CEACAM1/MAD2L2/FGR/CD28/LAT2/CR2/FADD/TYROBP/BST2/FES/NECTIN2/PRKCD/TNFSF13/ARG1/FUT7/STXBP2/ARRB2/IRF7/CD55/C2/SPI1/CLU/C1RL/VAV1/TUBB4B/IL18R1/CD300A/KLRC4/IL4R/BCL6/CR1/BCL3/RAC2/HLA-A/ARID5A/SUSD4/ICAM1/PTGDR/DBH/SERPING1/TCIRG1/LILRB1/RABGEF1/LGALS9/…	157
BP	GO:0050867	positive regulation of cell activation	157/2932	467/18903	7.39987e-23	4.19034e-20	3.43793e-20	LEF1/IL7R/LILRA5/RASGRP1/MYD88/BST1/IL10/CD177/TESPA1/CD40LG/GATA3/LILRB4/SMARCD3/NFATC2/LGALS1/ANXA1/CLEC4D/B2M/IL18/GAS6/ITGAM/DPP4/JAK3/BCL2/VNN1/MAD2L2/FGR/CD28/FLOT2/AIF1/FADD/TYROBP/TNFSF13B/NECTIN2/MMP8/TNFSF13/PLA2G4A/CD55/CEBPA/IL15RA/PYCARD/ZBTB7B/CDKN1A/VAV1/IL4R/BCL6/CD5/PDCD1LG2/CD274/GPR183/CR1/HLA-A/SOCS1/IGFBP2/VSIR/HAVCR1/TOX/BMI1/PNP/PLEK/SELENOK/BAD/LILRB1/FCRL3/LGALS9/IL1B/LIL…	157
BP	GO:0019724	B cell mediated immunity	94/2932	218/18903	1.26623e-22	6.5728e-20	5.39259e-20	FCGR1A/MYD88/CCR6/C1QC/IL10/FCER1G/CD40LG/C1QB/BATF/B2M/C1QA/MAD2L2/CD28/CR2/NECTIN2/PRKCD/TNFSF13/IRF7/CD55/C2/CLU/C1RL/IL4R/BCL6/CR1/BCL3/SUSD4/SERPING1/TCIRG1/CR1L/FCGR2B/TGFB1/HLA-DOA/C1R/NOD2/EXO1/IGHV6-1/IGHG1/NBN/C4B/C4A/IGHD/IGHV3-72/IGHG4/IGLL5/IGLC2/TREX1/IGLC1/IGLC6/HLA-G/IGHV2-70D/IGHG3/IGKC/IGHV3-64/IGHV1-45/AICDA/IGLC3/IGHV1-69/IGHA2/IGHV5-10-1/IGHV1-69D/IGHV1-18/C8B/IGHV1-24/IGHV3-…	94
BP	GO:0016064	immunoglobulin mediated immune response	93/2932	215/18903	1.62314e-22	7.77735e-20	6.38085e-20	FCGR1A/MYD88/CCR6/C1QC/IL10/FCER1G/CD40LG/C1QB/BATF/B2M/C1QA/MAD2L2/CD28/CR2/NECTIN2/PRKCD/TNFSF13/IRF7/CD55/C2/CLU/C1RL/IL4R/BCL6/CR1/BCL3/SUSD4/SERPING1/TCIRG1/CR1L/FCGR2B/TGFB1/HLA-DOA/C1R/NOD2/EXO1/IGHV6-1/IGHG1/NBN/C4B/C4A/IGHD/IGHV3-72/IGHG4/IGLL5/IGLC2/TREX1/IGLC1/IGLC6/IGHV2-70D/IGHG3/IGKC/IGHV3-64/IGHV1-45/AICDA/IGLC3/IGHV1-69/IGHA2/IGHV5-10-1/IGHV1-69D/IGHV1-18/C8B/IGHV1-24/IGHV3-33/IGH…	93
BP	GO:0006910	phagocytosis, recognition	59/2932	103/18903	2.27514e-22	1.01228e-19	8.30513e-20	FCGR1A/FCN1/JMJD6/TUB/CFP/FCN2/PTX3/IGHV6-1/IGHG1/C4B/IGHD/IGHV3-72/IGHG4/IGLL5/IGLC2/IGLC1/IGLC6/IGHV2-70D/IGHG3/IGKC/IGHV3-64/IGHV1-45/IGLC3/IGHV1-69/IGHA2/IGHV5-10-1/IGHV1-69D/IGHV1-18/IGHV1-24/IGHV3-33/IGHV2-70/IGHV3-74/IGHV3-23/IGHV3-30/IGHG2/IGHV3-64D/IGHA1/IGHV3-21/IGHV3-20/IGHV4-39/IGHV3-16/IGHV3-9/IGHV1-69-2/IGHV5-51/IGLC7/IGHV3-49/IGHV1-58/IGHV3-73/IGHV7-4-1/IGHV3-66/IGHV2-5/IGHV4-61/IG…	59
BP	GO:0002696	positive regulation of leukocyte activation	149/2932	450/18903	4.98824e-21	2.07145e-18	1.6995e-18	LEF1/IL7R/RASGRP1/MYD88/BST1/IL10/CD177/TESPA1/CD40LG/GATA3/LILRB4/SMARCD3/NFATC2/LGALS1/ANXA1/CLEC4D/B2M/IL18/GAS6/ITGAM/DPP4/JAK3/BCL2/VNN1/MAD2L2/FGR/CD28/FLOT2/AIF1/FADD/TYROBP/TNFSF13B/NECTIN2/MMP8/TNFSF13/PLA2G4A/CD55/CEBPA/IL15RA/PYCARD/ZBTB7B/CDKN1A/VAV1/IL4R/BCL6/CD5/PDCD1LG2/CD274/GPR183/CR1/HLA-A/SOCS1/IGFBP2/VSIR/HAVCR1/TOX/BMI1/PNP/SELENOK/BAD/LILRB1/FCRL3/LGALS9/IL1B/RARA/MDK/TGFB1/…	149
BP	GO:0006911	phagocytosis, engulfment	65/2932	127/18903	6.60588e-21	2.57175e-18	2.10997e-18	FCGR1A/ITGAM/MARCO/AIF1/RHOG/CD300A/RAC2/HAVCR1/RAB31/FCGR2B/GSN/IGHV6-1/IGHG1/MSR1/IGHD/IGHV3-72/IGHG4/THBS1/IGLL5/IGLC2/IGLC1/IGLC6/IGHV2-70D/IGHG3/IGKC/IGHV3-64/IGHV1-45/IGLC3/IGHV1-69/IGHA2/IGHV5-10-1/IGHV1-69D/IGHV1-18/IGHV1-24/IGHV3-33/IGHV2-70/IGHV3-74/IGHV3-23/IGHV3-30/ALOX15/IGHG2/IGHV3-64D/IGHA1/IGHV3-21/IGHV3-20/IGHV4-39/IGHV3-16/IGHV3-9/IGHV1-69-2/IGHV5-51/IGLC7/IGHV3-49/IGHV1-58/IGHV…	65
BP	GO:0002449	lymphocyte mediated immunity	129/2932	367/18903	7.28113e-21	2.66789e-18	2.18885e-18	FCGR1A/IL7R/RASGRP1/MYD88/CCR6/C1QC/IL10/SCART1/FCER1G/CD40LG/C1QB/GATA3/LILRB4/BATF/CD96/B2M/IL18/PRDX1/C1QA/CTSH/CEACAM1/MAD2L2/CD28/CR2/FADD/NECTIN2/PRKCD/TNFSF13/ARG1/FUT7/ARRB2/IRF7/CD55/C2/CLU/C1RL/VAV1/TUBB4B/IL18R1/KLRC4/IL4R/BCL6/CR1/BCL3/HLA-A/ARID5A/SUSD4/ICAM1/SERPING1/TCIRG1/LILRB1/LGALS9/HLA-H/IL1B/CR1L/FCGR2B/TGFB1/CD1C/CLEC4G/HLA-DOA/C1R/CD1E/NOD2/RSAD2/IL1R1/KIR2DL4/IL23R/EXO1/IG…	129
BP	GO:0002253	activation of immune response	135/2932	397/18903	2.61326e-20	8.60315e-18	7.05838e-18	PLEKHA1/AIM2/C1QC/FCER1G/NLRC4/TESPA1/C1QB/TXK/DUSP3/GATA3/PLSCR1/LILRB4/C3AR1/NFATC2/CD59/GCSAM/ITK/PLCG1/BMX/C1QA/CD3G/BCL2/CEACAM1/FGR/CD28/LAT2/CR2/CACNB4/TYROBP/NECTIN2/PRKCD/FPR1/FCN1/PAK3/FFAR2/HCK/CD55/SH2B2/PYCARD/C2/CLU/C1RL/VAV1/CD300A/CGAS/VSIG4/IFI16/KLRC4/CR1/RBCK1/THEMIS/HLA-A/SUSD4/CLEC6A/SERPING1/ZC3H12A/NFAM1/CFB/HSP90AA1/RABGEF1/ZBP1/CFP/FCN2/FCRL3/IL1B/CR1L/LILRA2/FCGR2B/GBP1/…	135
BP	GO:0050727	regulation of inflammatory response	139/2932	414/18903	2.62418e-20	8.60315e-18	7.05838e-18	ADAMTS12/ETS1/S100A9/FCGR1A/S100A8/LILRA5/S100A12/AIM2/MYD88/PSMA6/BST1/IL10/NLRC4/PPARG/GATA3/NR1D2/CST7/GBA1/CASP1/CASP4/LGALS1/NMI/ANXA1/NLRC3/IL18/SOCS3/CASP5/NT5E/OSM/PLCG1/RORA/ATM/NUPR1/GPER1/MAPK14/FGR/NAIP/CD28/FFAR3/CYP19A1/GRN/CAMK2N1/MMP9/RHBDF2/PRKCD/CEBPB/NR1D1/MMP8/ALOX5AP/PGLYRP1/IFI35/TNFAIP6/ALOX5/FUT7/FFAR2/HCK/CEBPA/PYCARD/GGT1/SBNO2/TNFAIP8L2/BCL6/IL17RA/SPHK1/FURIN/ZFP36/HYA…	139
BP	GO:0050853	B cell receptor signaling pathway	65/2932	130/18903	3.32365e-20	1.03515e-17	8.49281e-18	PLEKHA1/NFATC2/GCSAM/ITK/BMX/BCL2/LAT2/SH2B2/CD300A/NFAM1/FCRL3/FCGR2B/CD22/IGHV6-1/MS4A1/IGHG1/IGHD/IGHV3-72/IGHG4/IGLL5/IGLC2/IGLC1/IGLC6/IGHV2-70D/IGHG3/IGKC/IGHV3-64/IGHV1-45/IGLC3/IGHV1-69/IGHA2/IGHV5-10-1/IGHV1-69D/IGHV1-18/IGHV1-24/IGHV3-33/IGHV2-70/IGHV3-74/IGHV3-23/IGHV3-30/IGHG2/IGHV3-64D/IGHA1/IGHV3-21/IGHV3-20/IGHV4-39/IGHV3-16/IGHV3-9/IGHV1-69-2/IGHV5-51/IGLC7/IGHV3-49/IGHV1-58/IGHV3…	65
BP	GO:0050864	regulation of B cell activation	86/2932	204/18903	4.86904e-20	1.44425e-17	1.18492e-17	BST1/IL10/NFATC2/ATM/BCL2/SAMSN1/MAD2L2/CD28/TYROBP/TNFSF13B/TNFSF13/CDKN1A/CD300A/BCL6/GPR183/CR1/HMGB3/BMI1/NFAM1/BAD/FCRL3/FCGR2B/TGFB1/TNFRSF13C/NOD2/TLR4/MMP14/INHBA/SLAMF8/CD22/IGHV6-1/MZB1/IGHG1/IGHD/IGHV3-72/IGHG4/IGLL5/SFRP1/IGLC2/IGLC1/IGLC6/IGHV2-70D/IGHG3/IGKC/IGHV3-64/IGHV1-45/EPHB2/IGLC3/IGHV1-69/IGHA2/IGHV5-10-1/IGHV1-69D/IGHV1-18/IGHV1-24/IGHV3-33/IGHV2-70/IGHV3-74/IGHV3-23/IGHV3-…	86
BP	GO:0050871	positive regulation of B cell activation	72/2932	155/18903	7.02308e-20	1.98849e-17	1.63144e-17	BST1/IL10/NFATC2/BCL2/MAD2L2/CD28/TNFSF13B/TNFSF13/CDKN1A/BCL6/GPR183/BMI1/BAD/FCRL3/TGFB1/TNFRSF13C/NOD2/TLR4/MMP14/IGHV6-1/IGHG1/IGHD/IGHV3-72/IGHG4/IGLL5/IGLC2/IGLC1/IGLC6/IGHV2-70D/IGHG3/IGKC/IGHV3-64/IGHV1-45/EPHB2/IGLC3/IGHV1-69/IGHA2/IGHV5-10-1/IGHV1-69D/IGHV1-18/IGHV1-24/IGHV3-33/IGHV2-70/IGHV3-74/IGHV3-23/IGHV3-30/IGHG2/IGHV3-64D/IGHA1/IGHV3-21/IGHV3-20/IGHV4-39/IGHV3-16/IGHV3-9/IGHV1-69…	72
BP	GO:0099024	plasma membrane invagination	66/2932	136/18903	1.32571e-19	3.59038e-17	2.94569e-17	FCGR1A/ITGAM/MARCO/AIF1/RHOG/CD300A/RAC2/HAVCR1/RAB31/AURKB/FCGR2B/GSN/IGHV6-1/IGHG1/MSR1/IGHD/IGHV3-72/IGHG4/THBS1/IGLL5/IGLC2/IGLC1/IGLC6/IGHV2-70D/IGHG3/IGKC/IGHV3-64/IGHV1-45/IGLC3/IGHV1-69/IGHA2/IGHV5-10-1/IGHV1-69D/IGHV1-18/IGHV1-24/IGHV3-33/IGHV2-70/IGHV3-74/IGHV3-23/IGHV3-30/ALOX15/IGHG2/IGHV3-64D/IGHA1/IGHV3-21/IGHV3-20/IGHV4-39/IGHV3-16/IGHV3-9/IGHV1-69-2/IGHV5-51/IGLC7/IGHV3-49/IGHV1-5…	66
BP	GO:0010324	membrane invagination	68/2932	143/18903	1.52135e-19	3.94854e-17	3.23955e-17	FCGR1A/SNX3/ITGAM/MARCO/AIF1/RHOG/CD300A/CHMP2A/RAC2/HAVCR1/RAB31/AURKB/FCGR2B/GSN/IGHV6-1/IGHG1/MSR1/IGHD/IGHV3-72/IGHG4/THBS1/IGLL5/IGLC2/IGLC1/IGLC6/IGHV2-70D/IGHG3/IGKC/IGHV3-64/IGHV1-45/IGLC3/IGHV1-69/IGHA2/IGHV5-10-1/IGHV1-69D/IGHV1-18/IGHV1-24/IGHV3-33/IGHV2-70/IGHV3-74/IGHV3-23/IGHV3-30/ALOX15/IGHG2/IGHV3-64D/IGHA1/IGHV3-21/IGHV3-20/IGHV4-39/IGHV3-16/IGHV3-9/IGHV1-69-2/IGHV5-51/IGLC7/IGHV…	68
BP	GO:0051251	positive regulation of lymphocyte activation	134/2932	400/18903	1.59113e-19	3.96445e-17	3.2526e-17	LEF1/IL7R/RASGRP1/MYD88/BST1/IL10/TESPA1/CD40LG/GATA3/LILRB4/SMARCD3/NFATC2/LGALS1/ANXA1/B2M/IL18/GAS6/DPP4/JAK3/BCL2/VNN1/MAD2L2/CD28/FLOT2/AIF1/FADD/TYROBP/TNFSF13B/TNFSF13/CD55/IL15RA/PYCARD/ZBTB7B/CDKN1A/VAV1/IL4R/BCL6/CD5/PDCD1LG2/CD274/GPR183/CR1/HLA-A/SOCS1/IGFBP2/VSIR/TOX/BMI1/PNP/SELENOK/BAD/LILRB1/FCRL3/LGALS9/IL1B/RARA/MDK/TGFB1/JAK2/HLA-DOA/ADAM8/SIRPA/CCR7/TNFRSF13C/HLX/NOD2/TLR4/MIR…	134
BP	GO:0002683	negative regulation of immune system process	144/2932	449/18903	6.10847e-19	1.46345e-16	1.20067e-16	IL7R/C1QC/IL10/ZC3H8/PPARG/DUSP3/MILR1/CST7/LILRB4/CCL28/CD96/CD59/NMI/ANXA1/NLRC3/GCSAM/PLCG1/DPP4/ATM/ZBTB46/GPER1/MAPK14/JAK3/CEACAM1/SAMSN1/FGR/CR2/CYP19A1/FADD/TYROBP/BST2/GRN/RHBDF2/CEBPB/NR1D1/ARG1/TGFB3/PGLYRP1/TNFAIP6/LILRB3/ARRB2/HCK/CD55/CEBPA/ZBTB7B/SPI1/TRIM21/FSTL3/CD300A/VSIG4/TRIB1/IFI16/IL4R/TNFAIP8L2/BCL6/PDCD1LG2/IRAK3/CD274/FURIN/CR1/HMGB3/HLA-A/SOCS1/VSIR/BPI/OAS1/SUSD4/TRAFD…	144
BP	GO:0002768	immune response-regulating cell surface receptor signaling pathway	117/2932	341/18903	4.15539e-18	9.58664e-16	7.86527e-16	FCGR1A/PLEKHA1/FCGR1BP/FCER1G/TESPA1/TXK/DUSP3/GATA3/PLSCR1/LILRB4/C3AR1/NFATC2/CLEC4D/GCSAM/ITK/PLCG1/BMX/CD3G/BCL2/CEACAM1/FGR/CD28/LAT2/CR2/CACNB4/TYROBP/NECTIN2/PRKCD/FPR1/CLEC4E/FCN1/PAK3/FFAR2/HCK/SH2B2/VAV1/CD300A/KLRC4/CR1/RBCK1/THEMIS/HLA-A/CLEC6A/ZC3H12A/NFAM1/LILRB1/RABGEF1/FCN2/FCRL3/CD200R1/KIT/LILRA2/FCGR2B/GBP1/CCR7/FPR2/LGALS3/CD22/LILRA4/IGHV6-1/MS4A1/IGHG1/IGHD/IGHV3-72/IGHG4/IG…	117
BP	GO:0001819	positive regulation of cytokine production	148/2932	486/18903	3.58791e-17	7.98181e-15	6.54861e-15	LILRA5/RASGRP1/AIM2/GAPDH/MYD88/HMGB2/LAMTOR5/IL10/FCER1G/NLRC4/TLR5/CD40LG/TXK/GATA3/LY96/C3AR1/CASP1/BATF/ANXA1/SPTBN1/B2M/IL18/RNF135/CLEC5A/FLOT1/ITK/OSM/RORA/MAPK14/IL27/FGR/NAIP/CD28/AGPAT2/FFAR3/AIF1/FADD/TYROBP/SIGLEC16/CD58/CEBPB/MMP8/CD14/CYBA/CLEC4E/FCN1/IFNGR1/FFAR2/IRF7/CD55/PYCARD/ZBTB7B/CLU/IL18R1/CGAS/IFI16/SLC11A1/IL4R/IL17RA/IRAK3/CD274/SPHK1/FURIN/BCL3/HYAL2/HLA-A/ARID5A/OAS1/C…	148
BP	GO:0042113	B cell activation	114/2932	350/18903	8.49184e-16	1.79575e-13	1.4733e-13	LEF1/IL7R/RASGRP1/CCR6/BST1/IL10/CD40LG/BATF/NFATC2/CXCR5/LGALS1/DOCK10/ATM/JAK3/BCL2/SAMSN1/MAD2L2/CD28/LAT2/CR2/TYROBP/TNFSF13B/BST2/PRKCD/TNFSF13/ADGRG3/CDKN1A/SPI1/CD300A/BCL6/BAK1/GPR183/CR1/HMGB3/BCL3/HDAC4/BMI1/TCIRG1/NFAM1/BAD/FCRL3/KIT/PAX5/FCGR2B/TGFB1/TNFRSF13C/NOD2/TLR4/MMP14/INHBA/SLAMF8/CD22/EXO1/IGHV6-1/MS4A1/MZB1/IGHG1/NBN/LYL1/FLT3/IGHD/IGHV3-72/IGHG4/IGLL5/SFRP1/IGLC2/IGLC1/IGLC…	114
BP	GO:0002274	myeloid leukocyte activation	87/2932	237/18903	8.64864e-16	1.79575e-13	1.4733e-13	ANXA3/S100A12/RASGRP1/MYD88/IL10/FCER1G/CD177/CAMK4/PLSCR1/MILR1/CST7/LILRB4/BATF/NMI/ANXA1/CLEC4D/IL18/RORA/ITGAM/ATM/IFNGR2/C1QA/FGR/LAT2/AIF1/DYSF/TYROBP/FES/GRN/NECTIN2/PRKCD/NR1D1/MMP8/LTBR/IFI35/CAMP/JMJD6/STXBP2/IFNGR1/PLA2G4A/CEBPA/PYCARD/SPI1/CLU/SBNO2/CD300A/BATF2/VSIG4/SLC11A1/IL4R/ADAM9/SPHK1/RAC2/HYAL2/MT1G/BPI/HAVCR1/PTGDR/ZC3H12A/TLR2/RABGEF1/SUCNR1/LGALS9/KIT/HMOX1/LILRA2/RELB/FCG…	87
BP	GO:0002429	immune response-activating cell surface receptor signaling pathway	104/2932	312/18903	2.79912e-15	5.44866e-13	4.47031e-13	PLEKHA1/FCER1G/TESPA1/TXK/DUSP3/GATA3/PLSCR1/LILRB4/C3AR1/NFATC2/GCSAM/ITK/PLCG1/BMX/CD3G/BCL2/CEACAM1/FGR/CD28/LAT2/CR2/CACNB4/TYROBP/NECTIN2/PRKCD/FPR1/FCN1/PAK3/FFAR2/HCK/SH2B2/VAV1/CD300A/KLRC4/CR1/RBCK1/THEMIS/HLA-A/CLEC6A/ZC3H12A/NFAM1/RABGEF1/FCN2/FCRL3/LILRA2/FCGR2B/GBP1/CCR7/FPR2/LGALS3/CD22/IGHV6-1/MS4A1/IGHG1/IGHD/IGHV3-72/IGHG4/IGLL5/IGLC2/IGLC1/IGLC6/IGHV2-70D/IGHG3/IGKC/IGHV3-64/IGH…	104
BP	GO:0002757	immune response-activating signal transduction	104/2932	312/18903	2.79912e-15	5.44866e-13	4.47031e-13	PLEKHA1/FCER1G/TESPA1/TXK/DUSP3/GATA3/PLSCR1/LILRB4/C3AR1/NFATC2/GCSAM/ITK/PLCG1/BMX/CD3G/BCL2/CEACAM1/FGR/CD28/LAT2/CR2/CACNB4/TYROBP/NECTIN2/PRKCD/FPR1/FCN1/PAK3/FFAR2/HCK/SH2B2/VAV1/CD300A/KLRC4/CR1/RBCK1/THEMIS/HLA-A/CLEC6A/ZC3H12A/NFAM1/RABGEF1/FCN2/FCRL3/LILRA2/FCGR2B/GBP1/CCR7/FPR2/LGALS3/CD22/IGHV6-1/MS4A1/IGHG1/IGHD/IGHV3-72/IGHG4/IGLL5/IGLC2/IGLC1/IGLC6/IGHV2-70D/IGHG3/IGKC/IGHV3-64/IGH…	104
BP	GO:0019221	cytokine-mediated signaling pathway	144/2932	496/18903	7.93489e-15	1.49777e-12	1.22883e-12	IL7R/LILRA5/AIM2/MYD88/CCR6/FCER1G/IFITM1/PPARG/TRAF5/TXK/LILRB4/IL10RB/CASP1/CASP4/CXCR5/PLP2/CARD16/CCR4/NMI/LILRA6/TXNDC17/IL18/NOL3/GAS6/ILK/OSM/IFNGR2/JAK3/CEACAM1/CCRL2/NAIP/IFITM3/AGPAT2/EXT1/FADD/DOK1/IL18RAP/TNFSF13B/IFI27/ARG1/RPS6KA5/ACSL1/LILRB3/IFNGR1/IFITM2/HCK/IRF7/CEBPA/IL15RA/PYCARD/SPI1/IL1RN/IL18R1/PARP9/IL11RA/IL1R2/IL4R/IL17RA/IRAK3/SPHK1/TBKBP1/UGCG/SOCS1/OAS1/CSF2RA/CCR1/TN…	144
BP	GO:0002237	response to molecule of bacterial origin	112/2932	360/18903	5.32393e-14	9.75375e-12	8.00238e-12	S100A9/S100A8/MYD88/HMGB2/IL10/ADM/LY96/CASP1/CARD16/CD96/B2M/IL18/SLPI/MAPK14/CHMP5/TSPO/CEBPB/NR1D1/ARG1/CARD17P/CD14/CAMP/HCK/CD55/PYCARD/SPI1/SBNO2/TRIB1/ALPL/SLC11A1/ADAM9/PDCD1LG2/IRAK3/CD274/ZFP36/TNIP1/IL24/ARID5A/BPI/EDNRB/TIMP4/ZC3H12A/TLR2/PTGFR/LILRB1/PPBP/LGALS9/MIR223/LTF/MAP2K3/IL1B/MAOB/SLC7A5/LILRA2/RARA/PLSCR4/FCGR2B/HPGD/ACOD1/NFKBIA/TGFB1/MAPK3/JAK2/NOCT/DEFA3/CXCL10/TRIM6/NR1…	112
BP	GO:0032496	response to lipopolysaccharide	107/2932	339/18903	6.8413e-14	1.21756e-11	9.98932e-12	S100A9/S100A8/MYD88/HMGB2/IL10/ADM/LY96/CASP1/CARD16/CD96/IL18/SLPI/MAPK14/CHMP5/TSPO/CEBPB/NR1D1/ARG1/CARD17P/CD14/CAMP/HCK/CD55/PYCARD/SPI1/SBNO2/TRIB1/ALPL/SLC11A1/ADAM9/PDCD1LG2/IRAK3/CD274/ZFP36/TNIP1/IL24/ARID5A/BPI/EDNRB/TIMP4/ZC3H12A/TLR2/PTGFR/LILRB1/PPBP/LGALS9/MIR223/LTF/MAP2K3/IL1B/MAOB/SLC7A5/LILRA2/RARA/PLSCR4/HPGD/ACOD1/NFKBIA/TGFB1/MAPK3/JAK2/NOCT/DEFA3/CXCL10/TRIM6/NR1H3/LITAF/SI…	107
BP	GO:0002697	regulation of immune effector process	115/2932	379/18903	1.64689e-13	2.84958e-11	2.33791e-11	FCGR1A/IL7R/RASGRP1/MYD88/IL10/CD177/CD40LG/GATA3/LILRB4/BATF/CD96/CD59/ANXA1/B2M/IL18/ITGAM/IL27/JAK3/CEACAM1/MAD2L2/FGR/CD28/CR2/FFAR3/FADD/TYROBP/BST2/FES/GRN/NECTIN2/TNFSF13/ARG1/TGFB3/PGLYRP1/FCN1/FUT7/STXBP2/ARRB2/FFAR2/JUNB/CD55/PYCARD/ZBTB7B/SPI1/VAV1/IL18R1/CD300A/UBE2J1/CGAS/VSIG4/KLRC4/IL4R/BCL6/IRAK3/CR1/RAC2/HLA-A/ARID5A/SUSD4/ICAM1/SERPING1/ZC3H12A/ANGPT1/LILRB1/RABGEF1/CFP/FCN2/FCR…	115
BP	GO:0032102	negative regulation of response to external stimulus	127/2932	436/18903	2.42774e-13	4.08713e-11	3.35325e-11	EPHA4/UFD1/IL10/PPARG/DUSP3/GATA3/NR1D2/CST7/GBA1/CARD16/RNF125/CD96/NMI/NLRC3/SOCS3/NT5E/PLCG1/RORA/DPP4/GPER1/PHLDB2/MAPK14/SEMA5A/CEACAM1/FGR/AIF1/CYP19A1/GRN/RHBDF2/PRKCD/NR1D1/SEMA6B/KREMEN1/ARG1/PGLYRP1/SEMA4A/TNFAIP6/ALOX5/ARRB2/HCK/SERPINB2/PLAUR/AJAP1/TRIM21/VSIG4/TRIB1/IFI16/TNFAIP8L2/IRAK3/PTPRS/FURIN/CR1/ZFP36/METRNL/RGMA/HLA-A/OAS1/SUSD4/TRAFD1/SERPING1/TNFRSF1A/LILRB1/RABGEF1/NLRP12…	127
BP	GO:0009615	response to virus	121/2932	409/18903	2.7517e-13	4.51062e-11	3.7007e-11	RNASE2/UFD1/MID2/AIM2/MYD88/LAMTOR5/APOBEC3B/IFITM1/GATA3/PLSCR1/PSMA2/IL10RB/CASP1/RNF125/NMI/RNF135/IFNGR2/ZMYND11/MAPK14/IL27/BCL2/FGR/IFITM3/TRIM25/EXT1/FADD/BST2/FOSL1/APOBEC3A/IFI27/MLKL/IFNGR1/IFITM2/IRF7/EXOSC4/PYCARD/CLU/AP1S1/PARP9/TRIM21/CGAS/IFI16/IL17RA/IRAK3/TBKBP1/BCL3/IRF9/NPC2/HYAL2/OAS1/TRIM22/IFI6/ZC3H12A/TLR2/MARCHF2/SELENOK/LILRB1/HSP90AA1/NT5C3A/PML/ZBP1/RTP4/ISG15/LGALS9/UN…	121
BP	GO:0060326	cell chemotaxis	100/2932	319/18903	7.19723e-13	1.14953e-10	9.43119e-11	S100A9/S100A8/LEF1/S100A12/CCR6/BST1/HMGB2/IL10/FCER1G/CKLF/RAB13/CCL28/C3AR1/HSD3B7/CXCR5/TRPM2/CCR4/ANXA1/GAS6/DPP4/SEMA5A/CCRL2/AIF1/CYP19A1/PRKCD/MTUS1/TNFAIP6/ALOX5/RHOG/ARRB2/FFAR2/SPI1/VAV1/IL17RA/GPR183/RAC2/EDNRB/TRPV4/CCR1/GPSM3/PLEKHG5/PPBP/CXCL16/DUSP1/ACKR3/PDGFD/LGALS9/MIR223/CCN3/CSF3R/IL1B/KIT/PPIB/MPP1/HGF/MMP28/PARVA/CCL24/MDK/PADI2/RIN3/MAPK3/CXCR1/CXCL10/ADAM8/CXCL17/DDT/CCR7/…	100
BP	GO:0031348	negative regulation of defense response	89/2932	272/18903	9.27382e-13	1.44417e-10	1.18485e-10	UFD1/IL10/PPARG/GATA3/NR1D2/CST7/GBA1/RNF125/CD96/NMI/NLRC3/SOCS3/NT5E/PLCG1/RORA/GPER1/MAPK14/CEACAM1/FGR/CYP19A1/GRN/RHBDF2/PRKCD/NR1D1/ARG1/PGLYRP1/TNFAIP6/ALOX5/ARRB2/HCK/TRIM21/VSIG4/IFI16/TNFAIP8L2/IRAK3/FURIN/CR1/ZFP36/METRNL/HLA-A/OAS1/SUSD4/TRAFD1/SERPING1/TNFRSF1A/LILRB1/RABGEF1/NLRP12/ISG15/LGALS9/MIR223/CD200R1/CCN3/HGF/FCGR2B/WFDC1/ACOD1/MDK/PBK/NR1H3/CXCL17/SIRPA/FPR2/NOD2/IL22RA2/G…	89
BP	GO:0050900	leukocyte migration	117/2932	398/18903	1.0936e-12	1.66147e-10	1.36314e-10	S100A9/S100A8/S100A12/MYD88/CCR6/BST1/IL10/FCER1G/CD177/CKLF/GATA3/GBA1/CCL28/C3AR1/HSD3B7/CXCR5/ITGA7/TRPM2/ITGA6/ANXA1/GCSAM/GAS6/ST3GAL4/DPP4/SELL/AIF1/EXT1/CYP19A1/FADD/MMP9/MTUS1/TNFAIP6/ALOX5/FUT7/RHOG/FFAR2/HCK/PYCARD/SPI1/VAV1/CD300A/IL17RA/GPR183/TRIM55/RAC2/EDNRB/ICAM1/DBH/TRPV4/CCR1/GPSM3/SELENOK/SELPLG/RABGEF1/PPBP/NLRP12/CXCL16/DUSP1/PDGFD/LGALS9/MIR223/CD200R1/CCN3/CSF3R/IL1B/KIT/HM…	117
BP	GO:0071222	cellular response to lipopolysaccharide	77/2932	222/18903	1.16386e-12	1.72612e-10	1.41618e-10	MYD88/HMGB2/IL10/LY96/CASP1/CARD16/IL18/MAPK14/CHMP5/TSPO/CEBPB/NR1D1/ARG1/CARD17P/CD14/CAMP/HCK/CD55/PYCARD/SPI1/SBNO2/TRIB1/ADAM9/PDCD1LG2/CD274/ZFP36/TNIP1/IL24/ARID5A/BPI/EDNRB/ZC3H12A/TLR2/LILRB1/PPBP/MIR223/LTF/MAP2K3/IL1B/SLC7A5/LILRA2/RARA/PLSCR4/ACOD1/NFKBIA/TGFB1/MAPK3/JAK2/DEFA3/CXCL10/NR1H3/LITAF/SIRPA/CEBPE/NOD2/TLR4/MIR21/PF4/CMPK2/NLRP7/ASS1/CTSG/DEFA1B/IRAK2/CCL2/CXCL11/DEFA4/DEFA…	77
BP	GO:0050851	antigen receptor-mediated signaling pathway	84/2932	252/18903	1.31319e-12	1.90229e-10	1.56072e-10	PLEKHA1/TESPA1/TXK/DUSP3/GATA3/LILRB4/NFATC2/GCSAM/ITK/PLCG1/BMX/CD3G/BCL2/CEACAM1/CD28/LAT2/CACNB4/NECTIN2/SH2B2/CD300A/RBCK1/THEMIS/HLA-A/ZC3H12A/NFAM1/FCRL3/FCGR2B/GBP1/CCR7/LGALS3/CD22/IGHV6-1/MS4A1/IGHG1/IGHD/IGHV3-72/IGHG4/IGLL5/IGLC2/IGLC1/IGLC6/IGHV2-70D/IGHG3/IGKC/IGHV3-64/IGHV1-45/CD276/IGLC3/IGHV1-69/IGHA2/IGHV5-10-1/IGHV1-69D/IGHV1-18/IGHV1-24/IGHV3-33/IGHV2-70/IGHV3-74/IGHV3-23/IGHV3…	84
BP	GO:0008037	cell recognition	78/2932	230/18903	3.08894e-12	4.37296e-10	3.58775e-10	AMIGO1/NRCAM/EPHA4/FCGR1A/SEMA5A/EXT1/FCN1/JMJD6/CD5/FOLR3/ALDOA/OVGP1/TUB/CFP/FCN2/PTX3/CCR7/SPA17/CNTNAP2/LGALS3/BSG/IGHV6-1/IGHG1/SPACA3/C4B/IGHD/IGHV3-72/IGHG4/IGLL5/IGLC2/PRSS37/IGLC1/IGLC6/IGHV2-70D/IGHG3/IGKC/IGHV3-64/IGHV1-45/EPHB2/IGLC3/ROBO1/IGHV1-69/IGHA2/IGHV5-10-1/IGHV1-69D/IGHV1-18/IGHV1-24/IGHV3-33/IGHV2-70/IGHV3-74/IGHV3-23/IGHV3-30/IGHG2/IGHV3-64D/IGHA1/IGHV3-21/IGHV3-20/IGHV4-39…	78
BP	GO:0050777	negative regulation of immune response	68/2932	190/18903	4.64983e-12	6.4364e-10	5.28068e-10	IL7R/IL10/PPARG/LILRB4/CD96/CD59/NMI/ANXA1/NLRC3/PLCG1/MAPK14/JAK3/CEACAM1/SAMSN1/FGR/CR2/GRN/RHBDF2/ARG1/PGLYRP1/ARRB2/HCK/CD55/ZBTB7B/SPI1/TRIM21/CD300A/VSIG4/IFI16/IL4R/BCL6/IRAK3/FURIN/CR1/HLA-A/OAS1/SUSD4/TRAFD1/SERPING1/ZC3H12A/LILRB1/RABGEF1/ISG15/LGALS9/CR1L/HMOX1/FCGR2B/ACOD1/CLEC4G/NR1H3/HLX/NOD2/GPX1/USP18/ENPP3/MIR21/LGALS3/KIR2DL4/SLAMF8/OAS3/DHX58/GPR17/NLRP6/TREX1/HLA-G/IL1RL1/IL33…	68
BP	GO:0071219	cellular response to molecule of bacterial origin	78/2932	234/18903	8.27297e-12	1.11046e-09	9.11066e-10	MYD88/HMGB2/IL10/LY96/CASP1/CARD16/IL18/MAPK14/CHMP5/TSPO/CEBPB/NR1D1/ARG1/CARD17P/CD14/CAMP/HCK/CD55/PYCARD/SPI1/SBNO2/TRIB1/ADAM9/PDCD1LG2/CD274/ZFP36/TNIP1/IL24/ARID5A/BPI/EDNRB/ZC3H12A/TLR2/LILRB1/PPBP/MIR223/LTF/MAP2K3/IL1B/SLC7A5/LILRA2/RARA/PLSCR4/FCGR2B/ACOD1/NFKBIA/TGFB1/MAPK3/JAK2/DEFA3/CXCL10/NR1H3/LITAF/SIRPA/CEBPE/NOD2/TLR4/MIR21/PF4/CMPK2/NLRP7/ASS1/CTSG/DEFA1B/IRAK2/CCL2/CXCL11/DEF…	78
BP	GO:0051607	defense response to virus	94/2932	304/18903	8.3788e-12	1.11046e-09	9.11066e-10	RNASE2/UFD1/MID2/AIM2/MYD88/APOBEC3B/IFITM1/PLSCR1/IL10RB/CASP1/RNF125/RNF135/IFNGR2/ZMYND11/IL27/BCL2/IFITM3/TRIM25/FADD/BST2/APOBEC3A/IFI27/MLKL/IFITM2/IRF7/EXOSC4/PYCARD/PARP9/TRIM21/CGAS/IFI16/TBKBP1/IRF9/HYAL2/OAS1/TRIM22/IFI6/ZC3H12A/TLR2/MARCHF2/SELENOK/LILRB1/HSP90AA1/NT5C3A/PML/ZBP1/RTP4/ISG15/UNC93B1/IL1B/OASL/CD207/ACOD1/DDX60L/IRF1/IFIT3/EIF2AK2/GBP1/IFI44L/DEFA3/CXCL10/TRIM6/ISG20/RS…	94
BP	GO:0140546	defense response to symbiont	94/2932	305/18903	1.02954e-11	1.33604e-09	1.09614e-09	RNASE2/UFD1/MID2/AIM2/MYD88/APOBEC3B/IFITM1/PLSCR1/IL10RB/CASP1/RNF125/RNF135/IFNGR2/ZMYND11/IL27/BCL2/IFITM3/TRIM25/FADD/BST2/APOBEC3A/IFI27/MLKL/IFITM2/IRF7/EXOSC4/PYCARD/PARP9/TRIM21/CGAS/IFI16/TBKBP1/IRF9/HYAL2/OAS1/TRIM22/IFI6/ZC3H12A/TLR2/MARCHF2/SELENOK/LILRB1/HSP90AA1/NT5C3A/PML/ZBP1/RTP4/ISG15/UNC93B1/IL1B/OASL/CD207/ACOD1/DDX60L/IRF1/IFIT3/EIF2AK2/GBP1/IFI44L/DEFA3/CXCL10/TRIM6/ISG20/RS…	94
BP	GO:0002698	negative regulation of immune effector process	50/2932	122/18903	1.07254e-11	1.36343e-09	1.11862e-09	IL7R/IL10/LILRB4/CD96/CD59/ANXA1/JAK3/CEACAM1/CR2/BST2/GRN/ARG1/TGFB3/PGLYRP1/ARRB2/CD55/ZBTB7B/SPI1/CD300A/VSIG4/IL4R/BCL6/IRAK3/CR1/HLA-A/SUSD4/SERPING1/ZC3H12A/ANGPT1/LILRB1/RABGEF1/FCRL3/LGALS9/CR1L/HMOX1/FCGR2B/TGFB1/CLEC4G/PRG2/APOA2/HLX/NOD2/ENPP3/LGALS3/KIR2DL4/SLAMF8/CD22/ACP5/HLA-G/IL33	50
BP	GO:0030595	leukocyte chemotaxis	78/2932	240/18903	3.40378e-11	4.24043e-09	3.47902e-09	S100A9/S100A8/S100A12/CCR6/BST1/IL10/FCER1G/CKLF/C3AR1/HSD3B7/CXCR5/TRPM2/ANXA1/GAS6/DPP4/AIF1/CYP19A1/MTUS1/TNFAIP6/ALOX5/FFAR2/SPI1/VAV1/IL17RA/GPR183/RAC2/EDNRB/TRPV4/CCR1/GPSM3/PPBP/CXCL16/DUSP1/LGALS9/MIR223/CCN3/CSF3R/IL1B/KIT/PPIB/MPP1/MMP28/CCL24/MDK/PADI2/RIN3/MAPK3/CXCR1/CXCL10/ADAM8/CXCL17/DDT/CCR7/FPR2/NOD2/PGF/PF4/LGALS3/SLAMF8/MMP2/BSG/CCL8/CTSG/ITGA9/DEFA1B/CCL2/CCL25/CXCL11/DEFA1/…	78
BP	GO:1903131	mononuclear cell differentiation	128/2932	473/18903	5.26146e-11	6.4262e-09	5.27232e-09	BCL11B/LEF1/IL7R/RASGRP1/TCF7/CCR6/IL10/FCER1G/ZC3H8/TESPA1/PPARG/CD40LG/CAMK4/GATA3/PRELID1/GBA1/LILRB4/SMARCD3/BATF/TRPM2/LGALS1/ANXA1/CLEC4D/B2M/IL18/GAS6/ITK/DOCK10/RORA/ATM/ZBTB46/IL27/JAK3/CD3G/BCL2/VNN1/CD28/CR2/CTSL/FADD/TNFSF13B/FES/CEBPB/LTBR/ADGRG3/PGLYRP1/SEMA4A/CLEC4E/JMJD6/FUT7/JUNB/IRF7/IL15RA/ZBTB7B/SPI1/VAV1/PDE1B/IL18R1/BATF2/IFI16/IL4R/BCL6/BAK1/GPR183/CR1/HMGB3/NFIL3/BCL3/THEM…	128
BP	GO:0097529	myeloid leukocyte migration	78/2932	242/18903	5.36667e-11	6.42865e-09	5.27433e-09	S100A9/S100A8/S100A12/MYD88/BST1/FCER1G/CD177/CKLF/C3AR1/ANXA1/DPP4/AIF1/CYP19A1/MTUS1/TNFAIP6/FUT7/RHOG/SPI1/VAV1/CD300A/IL17RA/TRIM55/RAC2/EDNRB/TRPV4/CCR1/SELENOK/RABGEF1/PPBP/DUSP1/PDGFD/MIR223/CD200R1/CCN3/CSF3R/IL1B/KIT/PPIB/MPP1/MMP28/CCL24/MDK/RIN3/MAPK3/CXCR1/CXCL10/ADAM8/CXCL17/DDT/SIRPA/CCR7/FPR2/NOD2/PGF/MMP14/PF4/LGALS3/IL1R1/SLAMF8/MMP2/BSG/CCL8/CTSG/ITGA9/PRTN3/CCL2/CCL25/CXCL11/PF…	78
BP	GO:0019058	viral life cycle	94/2932	319/18903	1.58832e-10	1.86672e-08	1.53154e-08	DYNLT1/MID2/LAMTOR5/APOBEC3B/IFITM1/PLSCR1/NMT2/LGALS1/WWP1/CLEC5A/SLPI/GAS6/SNX3/DPP4/STOM/CHMP5/BCL2/CDHR3/CD28/IFITM3/CR2/CTSL/TRIM25/CTSB/BST2/NECTIN2/APOBEC3A/IFI27/SRPK1/FCN1/IFITM2/CD55/VAPA/TRIM21/IFI16/CHMP2A/FURIN/CR1/RNASEK/HYAL2/TNIP1/OAS1/TRIM22/HAVCR1/ICAM1/ACE2/ZC3H12A/RAB1B/SELPLG/HSPA1B/PARP10/CDK1/CLDN9/ISG15/LGALS9/RAB43/NCAM1/LTF/HSPA1A/OASL/LY6E/PPIB/PTX3/TOP2A/EIF2AK2/GYPA/C…	94
BP	GO:0002831	regulation of response to biotic stimulus	103/2932	361/18903	1.656e-10	1.91023e-08	1.56723e-08	UFD1/RASGRP1/AIM2/HMGB2/NLRC4/PPARG/TXK/PLSCR1/LY96/CARD16/RNF125/CD96/NMI/NLRC3/RNF135/IL27/CEACAM1/FGR/FADD/TYROBP/SIGLEC16/GRN/NECTIN2/ARG1/CD14/CYBA/IFI35/FCN1/PAK3/ARRB2/EMILIN2/FFAR2/HCK/IRF7/CD55/PYCARD/SPI1/VAV1/PARP9/TRIM21/CGAS/VSIG4/TRIB1/IFI16/KLRC4/IRAK3/CD274/CR1/HLA-A/SOCS1/OAS1/SUSD4/TRAFD1/CLEC6A/SERPING1/ZC3H12A/SELENOK/LILRB1/HSP90AA1/ZBP1/FCN2/ISG15/LGALS9/LTF/NCF1/IL1B/OASL/L…	103
BP	GO:0050729	positive regulation of inflammatory response	56/2932	154/18903	1.72891e-10	1.95807e-08	1.60648e-08	ETS1/S100A9/FCGR1A/S100A8/LILRA5/S100A12/AIM2/NLRC4/CASP1/CASP4/LGALS1/NMI/IL18/OSM/NUPR1/NAIP/CD28/FFAR3/GRN/CAMK2N1/CEBPB/MMP8/ALOX5AP/IFI35/FFAR2/CEBPA/PYCARD/IL17RA/HYAL2/TNIP1/TRPV4/TLR2/TNFRSF1A/GPSM3/NLRP12/ZBP1/SUCNR1/IL1B/NFKBIA/CCL24/MDK/GPR4/JAK2/ADAM8/DDT/CCR7/TLR4/MIR21/IDO1/GPRC5B/NLRP6/SNCA/IL1RL1/FABP4/IL33/IL21	56
BP	GO:0031349	positive regulation of defense response	91/2932	307/18903	2.20886e-10	2.45696e-08	2.01579e-08	ETS1/S100A9/FCGR1A/S100A8/LILRA5/S100A12/RASGRP1/AIM2/HMGB2/NLRC4/TXK/PLSCR1/CASP1/CASP4/LGALS1/NMI/IL18/OSM/NUPR1/NAIP/CD28/FFAR3/FADD/TYROBP/SIGLEC16/GRN/NECTIN2/CAMK2N1/CEBPB/MMP8/ALOX5AP/ARG1/CYBA/IFI35/FCN1/PAK3/EMILIN2/FFAR2/HCK/IRF7/CEBPA/PYCARD/SPI1/VAV1/PARP9/CGAS/IFI16/KLRC4/IL17RA/HYAL2/TNIP1/CLEC6A/TRPV4/TLR2/TNFRSF1A/GPSM3/HSP90AA1/NLRP12/ZBP1/FCN2/SUCNR1/IL1B/LILRA2/ACOD1/NFKBIA/CCL…	91
BP	GO:0034341	response to interferon-gamma	52/2932	140/18903	3.17033e-10	3.46455e-08	2.84246e-08	GAPDH/IFITM1/PPARG/TXK/CASP1/RAB20/NMI/IFNGR2/IFITM3/AIF1/BST2/CD58/ARG1/IFNGR1/SLC26A6/IFITM2/HCK/STXBP4/PARP9/TRIM21/SLC11A1/GBP2/SOCS1/ZYX/TLR2/CXCL16/LGALS9/RAB43/ACOD1/CCL24/IRF1/JAK2/GBP1/GBP6/GSN/NR1H3/SIRPA/GCH1/TLR4/IL23R/GBP5/CCL8/ASS1/GBP3/CCL2/CCL25/SNCA/CCL7/CCL23/GBP4/CCL18/CCL20	52
BP	GO:0002385	mucosal immune response	23/2932	39/18903	6.63034e-10	7.00032e-08	5.74335e-08	RNASE2/H2BC21/H2BC12/FFAR3/CAMP/FFAR2/H2BC6/LTF/H2BC8/H2BC12L/RNASE3/DEFA3/H2BC4/NOD2/DEFB1/H2BC11/RAB17/H2BC7/DEFA1B/DEFA4/DEFA1/PIGR/DEFA5	23
BP	GO:0002227	innate immune response in mucosa	19/2932	28/18903	6.63058e-10	7.00032e-08	5.74335e-08	RNASE2/H2BC21/H2BC12/CAMP/H2BC6/LTF/H2BC8/H2BC12L/RNASE3/DEFA3/H2BC4/NOD2/DEFB1/H2BC11/H2BC7/DEFA1B/DEFA4/DEFA1/DEFA5	19
BP	GO:0032103	positive regulation of response to external stimulus	122/2932	464/18903	1.04064e-09	1.08036e-07	8.86373e-08	ETS1/S100A9/FCGR1A/S100A8/LILRA5/S100A12/RASGRP1/AIM2/CCR6/HMGB2/NLRC4/TXK/PLSCR1/LY96/C3AR1/CASP1/CASP4/LGALS1/CCR4/NMI/IL18/GAS6/FKBP1B/OSM/NUPR1/SEMA5A/NAIP/CD28/FFAR3/AIF1/FADD/TYROBP/SIGLEC16/GRN/NECTIN2/CAMK2N1/CEBPB/MMP8/ALOX5AP/ARG1/CD14/CYBA/IFI35/FCN1/PAK3/EMILIN2/FFAR2/HCK/IRF7/CEBPA/PYCARD/SPI1/VAV1/PARP9/CGAS/IFI16/KLRC4/IL17RA/RAC2/HYAL2/TNIP1/CLEC6A/TRPV4/CCR1/TLR2/TNFRSF1A/GPSM3/H…	122
BP	GO:0071216	cellular response to biotic stimulus	79/2932	261/18903	1.16074e-09	1.17851e-07	9.66896e-08	MYD88/HMGB2/IL10/LY96/CASP1/CARD16/IL18/MAPK14/CHMP5/TSPO/CEBPB/NR1D1/ARG1/CARD17P/CD14/CAMP/HCK/CD55/PYCARD/SPI1/SBNO2/TRIB1/ADAM9/PDCD1LG2/CD274/ZFP36/TNIP1/IL24/ARID5A/BPI/EDNRB/CDA/ZC3H12A/TLR2/LILRB1/PPBP/MIR223/LTF/MAP2K3/IL1B/SLC7A5/LILRA2/RARA/PLSCR4/FCGR2B/ACOD1/NFKBIA/TGFB1/MAPK3/JAK2/DEFA3/CXCL10/NR1H3/LITAF/SIRPA/CEBPE/NOD2/TLR4/MIR21/PF4/CMPK2/NLRP7/ASS1/CTSG/DEFA1B/IRAK2/CCL2/CXCL11…	79
BP	GO:0002366	leukocyte activation involved in immune response	86/2932	293/18903	1.17302e-09	1.17851e-07	9.66896e-08	ANXA3/LEF1/RASGRP1/MYD88/CCR6/IL10/FCER1G/CD177/CD40LG/GATA3/MILR1/BATF/LGALS1/NMI/ANXA1/CLEC4D/IL18/DOCK10/RORA/ITGAM/IL27/JAK3/CEACAM1/MAD2L2/FGR/CD28/LAT2/DYSF/TYROBP/FES/GRN/TNFSF13/PGLYRP1/SEMA4A/IFI35/CLEC4E/STXBP2/JUNB/PYCARD/ZBTB7B/SPI1/IL18R1/SBNO2/CD300A/SLC11A1/IL4R/BCL6/GPR183/CR1/BCL3/RAC2/RORC/ICAM1/PTGDR/ZC3H12A/LILRB1/RABGEF1/SUCNR1/LGALS9/KIT/HMOX1/LILRA2/RARA/RELB/FCGR2B/ENTPD7/…	86
BP	GO:0002251	organ or tissue specific immune response	24/2932	43/18903	1.33872e-09	1.32363e-07	1.08596e-07	RNASE2/H2BC21/H2BC12/FFAR3/CAMP/FFAR2/H2BC6/LTF/H2BC8/H2BC12L/RNASE3/DEFA3/H2BC4/NOD2/DEFB1/H2BC11/RAB17/H2BC7/DEFA1B/DEFA4/DEFA1/PIGR/TREX1/DEFA5	24
BP	GO:0048525	negative regulation of viral process	38/2932	91/18903	1.6577e-09	1.61341e-07	1.3237e-07	MID2/APOBEC3B/IFITM1/PLSCR1/SLPI/SNX3/IFITM3/TRIM25/BST2/APOBEC3A/SRPK1/FCN1/IFITM2/TRIM21/IFI16/ZFP36/TNIP1/OAS1/PARP10/ISG15/LTF/OASL/LY6E/PTX3/EIF2AK2/GSN/TRIM6/ISG20/RSAD2/OAS3/IFIT1/MX1/OAS2/IFIH1/TRIM10/IFIT5/AICDA/TRIM15	38
BP	GO:0007159	leukocyte cell-cell adhesion	111/2932	414/18903	1.79045e-09	1.71581e-07	1.40772e-07	ETS1/S100A9/S100A8/LEF1/IL7R/RASGRP1/IL10/ZC3H8/CD177/TESPA1/CD40LG/DUSP3/GATA3/LILRB4/CCL28/SMARCD3/LGALS1/ANXA1/B2M/IL18/NT5E/ST3GAL4/DPP4/JAK3/VNN1/CEACAM1/CD28/SELL/FLOT2/AIF1/EXT1/FADD/TNFSF13B/LRG1/CEBPB/ARG1/ALOX5/FUT7/CD55/FERMT3/PYCARD/ZBTB7B/VAV1/CD300A/VSIG4/IL4R/TNFAIP8L2/BCL6/CD5/PDCD1LG2/CD274/CR1/RAC2/TNIP1/HLA-A/SOCS1/IGFBP2/VSIR/ICAM1/BMI1/PNP/ZC3H12A/DLG5/SELENOK/BAD/LILRB1/TARM…	111
BP	GO:0002263	cell activation involved in immune response	86/2932	297/18903	2.42481e-09	2.28851e-07	1.87759e-07	ANXA3/LEF1/RASGRP1/MYD88/CCR6/IL10/FCER1G/CD177/CD40LG/GATA3/MILR1/BATF/LGALS1/NMI/ANXA1/CLEC4D/IL18/DOCK10/RORA/ITGAM/IL27/JAK3/CEACAM1/MAD2L2/FGR/CD28/LAT2/DYSF/TYROBP/FES/GRN/TNFSF13/PGLYRP1/SEMA4A/IFI35/CLEC4E/STXBP2/JUNB/PYCARD/ZBTB7B/SPI1/IL18R1/SBNO2/CD300A/SLC11A1/IL4R/BCL6/GPR183/CR1/BCL3/RAC2/RORC/ICAM1/PTGDR/ZC3H12A/LILRB1/RABGEF1/SUCNR1/LGALS9/KIT/HMOX1/LILRA2/RARA/RELB/FCGR2B/ENTPD7/…	86
BP	GO:0045088	regulation of innate immune response	73/2932	240/18903	3.88128e-09	3.57012e-07	2.92908e-07	RASGRP1/AIM2/HMGB2/NLRC4/PPARG/TXK/PLSCR1/CD96/NMI/NLRC3/RNF135/CEACAM1/FGR/FADD/TYROBP/GRN/NECTIN2/ARG1/IFI35/FCN1/PAK3/ARRB2/FFAR2/HCK/IRF7/PYCARD/SPI1/VAV1/PARP9/TRIM21/CGAS/VSIG4/IFI16/KLRC4/IRAK3/CR1/HLA-A/SOCS1/OAS1/SUSD4/TRAFD1/CLEC6A/SERPING1/LILRB1/HSP90AA1/ZBP1/FCN2/ISG15/LGALS9/NCF1/LILRA2/FCGR2B/ACOD1/IRF1/TRIM6/NR1H3/ADAM8/FPR2/NOD2/TLR4/USP18/MIR21/RIOK3/KIR2DL4/SLAMF8/GBP5/OAS3/DHX…	73
BP	GO:0002221	pattern recognition receptor signaling pathway	61/2932	187/18903	3.89739e-09	3.57012e-07	2.92908e-07	UFD1/AIM2/MYD88/NLRC4/TLR5/LY96/CASP1/RNF125/NMI/RNF135/FLOT1/MAP2K6/NAIP/NR1D1/CD14/CYBA/IFI35/CLEC4E/FCN1/ARRB2/FFAR2/IRF7/PYCARD/CD300A/TIFA/IRAK3/PTPRS/TNIP1/OAS1/TLR2/ALPK1/HSPA1B/FCN2/FCRL3/UNC93B1/LTF/HSPA1A/OASL/LILRA2/ACOD1/NFKBIA/IRF1/SLC15A3/NR1H3/NOD2/PIK3AP1/RSAD2/TLR4/RIOK3/LILRA4/OAS3/INAVA/CAV1/DHX58/IRAK2/TSPAN6/IFIH1/RIGI/NLRP6/DDX60/TRIM15	61
BP	GO:0001818	negative regulation of cytokine production	101/2932	371/18903	4.02935e-09	3.63751e-07	2.98436e-07	UFD1/LEF1/LILRA5/IL10/GATA3/GBA1/LILRB4/SERPINB1/CARD16/RNF125/CD96/NMI/ANXA1/NLRC3/GAS6/JAK3/CEACAM1/SRGN/TYROBP/BST2/TSPO/MMP8/ARG1/CARD17P/TGFB3/PGLYRP1/RPS6KA5/ABCD2/ARRB2/PYCARD/VSIG4/IL1R2/SLC11A1/HOMER3/BCL6/NDRG2/PDCD1LG2/IRAK3/CD274/PTPRS/FURIN/CR1/BCL3/ZFP36/TRIB2/VSIR/BPI/OAS1/ABCD1/ZC3H12A/ORM1/ANGPT1/LILRB1/RABGEF1/PML/NLRP12/LGALS9/CD200R1/LTF/HMOX1/RARA/RELB/HGF/FCGR2B/ACOD1/TGFB1/…	101
BP	GO:0097530	granulocyte migration	54/2932	158/18903	4.77764e-09	4.25141e-07	3.48803e-07	S100A9/S100A8/S100A12/MYD88/BST1/FCER1G/CD177/CKLF/C3AR1/ANXA1/DPP4/TNFAIP6/FUT7/RHOG/VAV1/CD300A/IL17RA/RAC2/TRPV4/SELENOK/PPBP/MIR223/CSF3R/IL1B/PPIB/MPP1/CCL24/MDK/MAPK3/CXCR1/CXCL10/ADAM8/CXCL17/CCR7/NOD2/PF4/LGALS3/IL1R1/SLAMF8/BSG/CCL8/ITGA9/PRTN3/CCL2/CCL25/CXCL11/PF4V1/THBS1/CCL7/IL1A/CCL23/CXCL9/CCL18/CCL20	54
BP	GO:0030099	myeloid cell differentiation	108/2932	407/18903	5.4922e-09	4.81844e-07	3.95324e-07	ETS1/LEF1/C1QC/HMGB2/PPARG/CAMK4/GATA3/GBA1/LILRB4/BATF/OSCAR/H4C8/B2M/CLEC5A/H4C4/ZBTB46/MAPK14/DHRS7B/JAK3/CEACAM1/TFE3/FADD/TYROBP/FES/MMP9/CEBPB/LTBR/TNFAIP6/JMJD6/LILRB3/JUNB/IRF7/CEBPA/SPI1/PDE1B/SBNO2/FSTL3/BATF2/TRIB1/IFI16/BCL6/ACVR1B/GPR183/HMGB3/ZFP36/SOCS1/H4C11/MT1G/NBEAL2/RASGRP4/FAM20C/CLEC1B/PIR/TCIRG1/CCR1/TLR2/RHAG/H4C12/TGFBR3/H4C5/LILRB1/PML/HSPA1B/AHSP/ISG15/MIR223/GPR137/LTF…	108
BP	GO:1990266	neutrophil migration	47/2932	130/18903	6.11611e-09	5.16495e-07	4.23754e-07	S100A9/S100A8/S100A12/MYD88/BST1/FCER1G/CD177/CKLF/C3AR1/DPP4/TNFAIP6/FUT7/RHOG/VAV1/RAC2/SELENOK/PPBP/MIR223/CSF3R/IL1B/PPIB/MPP1/CCL24/MDK/CXCR1/CXCL10/ADAM8/CCR7/NOD2/PF4/LGALS3/IL1R1/SLAMF8/BSG/CCL8/ITGA9/PRTN3/CCL2/CCL25/CXCL11/PF4V1/CCL7/IL1A/CCL23/CXCL9/CCL18/CCL20	47
BP	GO:0071706	tumor necrosis factor superfamily cytokine production	61/2932	189/18903	6.16103e-09	5.16495e-07	4.23754e-07	LILRA5/RASGRP1/MYD88/IL10/LY96/LILRB4/NLRC3/GAS6/FADD/TYROBP/TSPO/MMP8/CD14/CYBA/IFNGR1/ARRB2/PYCARD/CLU/UBE2J1/IRAK3/CD274/BCL3/ZFP36/ARID5A/VSIR/BPI/OAS1/ZC3H12A/ORM1/TLR2/ANGPT1/SELENOK/LILRB1/ORM2/LGALS9/LTF/LILRA2/RARA/JAK2/ADAM8/DDT/SIRPA/HSPB1/NOD2/TLR4/PF4/LILRA4/OAS3/OAS2/IFIH1/RIGI/ACP5/POMC/AKAP12/THBS1/TREX1/AZU1/EPHB2/IL1A/IGF1/IL33	61
BP	GO:1903555	regulation of tumor necrosis factor superfamily cytokine production	61/2932	189/18903	6.16103e-09	5.16495e-07	4.23754e-07	LILRA5/RASGRP1/MYD88/IL10/LY96/LILRB4/NLRC3/GAS6/FADD/TYROBP/TSPO/MMP8/CD14/CYBA/IFNGR1/ARRB2/PYCARD/CLU/UBE2J1/IRAK3/CD274/BCL3/ZFP36/ARID5A/VSIR/BPI/OAS1/ZC3H12A/ORM1/TLR2/ANGPT1/SELENOK/LILRB1/ORM2/LGALS9/LTF/LILRA2/RARA/JAK2/ADAM8/DDT/SIRPA/HSPB1/NOD2/TLR4/PF4/LILRA4/OAS3/OAS2/IFIH1/RIGI/ACP5/POMC/AKAP12/THBS1/TREX1/AZU1/EPHB2/IL1A/IGF1/IL33	61
BP	GO:0007088	regulation of mitotic nuclear division	44/2932	118/18903	6.21884e-09	5.16495e-07	4.23754e-07	MAD2L1BP/ATM/MAD2L2/CD28/AURKAIP1/SPHK1/PKMYT1/DLGAP5/BIRC5/DUSP1/SPC25/AURKB/CDC25C/USP44/CDC20/IL1B/TTK/TGFA/NUSAP1/CDCA2/BUB1/PLK1/SPC24/ESPL1/AURKA/CDK5RAP2/MKI67/NEK2/ZWINT/BUB1B/CDT1/NUF2/CCNB1/FBXO43/TRIP13/CHEK1/CDCA8/HASPIN/NDC80/EGF/CENPF/IL1A/IGF2/IGF1	44
BP	GO:0002695	negative regulation of leukocyte activation	63/2932	198/18903	6.53373e-09	5.35508e-07	4.39353e-07	IL10/ZC3H8/DUSP3/MILR1/CST7/LILRB4/ANXA1/ATM/ZBTB46/GPER1/JAK3/CEACAM1/SAMSN1/FGR/TYROBP/GRN/CEBPB/NR1D1/ARG1/PGLYRP1/ZBTB7B/SPI1/CD300A/VSIG4/IL4R/TNFAIP8L2/BCL6/PDCD1LG2/CD274/CR1/HMGB3/SOCS1/VSIR/BPI/ZC3H12A/DLG5/LILRB1/TARM1/RABGEF1/LGALS9/HMOX1/FCGR2B/MDK/IRF1/CLEC4G/LST1/MERTK/NR1H3/HLX/ENPP3/MIR21/ADORA2A/LGALS3/INHBA/IDO1/CTSG/SFRP1/GAL/HLA-G/PRDX2/GLI3/LAG3/TNFRSF13B	63
BP	GO:0007094	mitotic spindle assembly checkpoint signaling	24/2932	46/18903	8.18748e-09	6.45567e-07	5.2965e-07	MAD2L1BP/ATM/MAD2L2/BIRC5/DUSP1/SPC25/AURKB/USP44/CDC20/TTK/BUB1/PLK1/SPC24/CDK5RAP2/ZWINT/BUB1B/CDT1/NUF2/CCNB1/TRIP13/CDCA8/HASPIN/NDC80/CENPF	24
BP	GO:0071173	spindle assembly checkpoint signaling	24/2932	46/18903	8.18748e-09	6.45567e-07	5.2965e-07	MAD2L1BP/ATM/MAD2L2/BIRC5/DUSP1/SPC25/AURKB/USP44/CDC20/TTK/BUB1/PLK1/SPC24/CDK5RAP2/ZWINT/BUB1B/CDT1/NUF2/CCNB1/TRIP13/CDCA8/HASPIN/NDC80/CENPF	24
BP	GO:0071174	mitotic spindle checkpoint signaling	24/2932	46/18903	8.18748e-09	6.45567e-07	5.2965e-07	MAD2L1BP/ATM/MAD2L2/BIRC5/DUSP1/SPC25/AURKB/USP44/CDC20/TTK/BUB1/PLK1/SPC24/CDK5RAP2/ZWINT/BUB1B/CDT1/NUF2/CCNB1/TRIP13/CDCA8/HASPIN/NDC80/CENPF	24
BP	GO:0032640	tumor necrosis factor production	59/2932	184/18903	1.42122e-08	1.07105e-06	8.78734e-07	LILRA5/RASGRP1/MYD88/IL10/LY96/LILRB4/NLRC3/GAS6/FADD/TYROBP/TSPO/MMP8/CD14/CYBA/IFNGR1/ARRB2/PYCARD/CLU/UBE2J1/IRAK3/BCL3/ZFP36/ARID5A/VSIR/BPI/OAS1/ZC3H12A/ORM1/TLR2/ANGPT1/SELENOK/LILRB1/ORM2/LGALS9/LTF/LILRA2/RARA/JAK2/DDT/SIRPA/HSPB1/NOD2/TLR4/PF4/LILRA4/OAS3/OAS2/IFIH1/RIGI/ACP5/POMC/AKAP12/THBS1/TREX1/AZU1/EPHB2/IL1A/IGF1/IL33	59
BP	GO:0032680	regulation of tumor necrosis factor production	59/2932	184/18903	1.42122e-08	1.07105e-06	8.78734e-07	LILRA5/RASGRP1/MYD88/IL10/LY96/LILRB4/NLRC3/GAS6/FADD/TYROBP/TSPO/MMP8/CD14/CYBA/IFNGR1/ARRB2/PYCARD/CLU/UBE2J1/IRAK3/BCL3/ZFP36/ARID5A/VSIR/BPI/OAS1/ZC3H12A/ORM1/TLR2/ANGPT1/SELENOK/LILRB1/ORM2/LGALS9/LTF/LILRA2/RARA/JAK2/DDT/SIRPA/HSPB1/NOD2/TLR4/PF4/LILRA4/OAS3/OAS2/IFIH1/RIGI/ACP5/POMC/AKAP12/THBS1/TREX1/AZU1/EPHB2/IL1A/IGF1/IL33	59
BP	GO:0050728	negative regulation of inflammatory response	59/2932	184/18903	1.42122e-08	1.07105e-06	8.78734e-07	IL10/PPARG/GATA3/NR1D2/CST7/GBA1/NLRC3/SOCS3/NT5E/PLCG1/RORA/GPER1/MAPK14/FGR/CYP19A1/GRN/RHBDF2/PRKCD/NR1D1/PGLYRP1/TNFAIP6/ALOX5/HCK/TNFAIP8L2/FURIN/ZFP36/METRNL/TNFRSF1A/RABGEF1/NLRP12/MIR223/CD200R1/CCN3/HGF/FCGR2B/WFDC1/ACOD1/MDK/PBK/NR1H3/CXCL17/SIRPA/FPR2/NOD2/IL22RA2/GPX1/ENPP3/ADORA2A/SLAMF8/ELANE/SHARPIN/GPR17/ACP5/NLRP6/MACIR/IGF1/KRT1/HAMP/APOE	59
BP	GO:0031577	spindle checkpoint signaling	24/2932	47/18903	1.42715e-08	1.07105e-06	8.78734e-07	MAD2L1BP/ATM/MAD2L2/BIRC5/DUSP1/SPC25/AURKB/USP44/CDC20/TTK/BUB1/PLK1/SPC24/CDK5RAP2/ZWINT/BUB1B/CDT1/NUF2/CCNB1/TRIP13/CDCA8/HASPIN/NDC80/CENPF	24
BP	GO:0045071	negative regulation of viral genome replication	27/2932	57/18903	1.4577e-08	1.08095e-06	8.86859e-07	APOBEC3B/IFITM1/PLSCR1/SLPI/IFITM3/BST2/APOBEC3A/SRPK1/IFITM2/IFI16/TNIP1/OAS1/PARP10/ISG15/LTF/OASL/EIF2AK2/TRIM6/ISG20/RSAD2/OAS3/IFIT1/MX1/OAS2/IFIH1/IFIT5/AICDA	27
BP	GO:0019730	antimicrobial humoral response	45/2932	125/18903	1.48519e-08	1.08838e-06	8.92955e-07	S100A9/S100A12/GAPDH/H2BC21/H2BC12/SLPI/PGLYRP1/CAMP/H2BC6/SLC11A1/BCL3/HLA-A/ROMO1/ANG/PPBP/LTF/H2BC8/H2BC12L/ACOD1/RNASE3/DEFA3/CXCL10/H2BC4/NOD2/DEFB1/PF4/H2BC11/CTSG/ELANE/H2BC7/DEFA1B/PRTN3/CXCL11/DEFA4/DEFA1/PF4V1/IGKV3-20/AZU1/GATA6/JCHAIN/PI3/IGHA2/CXCL9/DEFA5/IGHA1	45
BP	GO:0042116	macrophage activation	41/2932	109/18903	1.51082e-08	1.09429e-06	8.978e-07	IL10/CST7/NMI/RORA/ITGAM/ATM/IFNGR2/C1QA/AIF1/DYSF/TYROBP/GRN/NR1D1/MMP8/IFI35/JMJD6/IFNGR1/PLA2G4A/CEBPA/CLU/SBNO2/VSIG4/SLC11A1/IL4R/SPHK1/BPI/ZC3H12A/TLR2/SUCNR1/FCGR2B/JAK2/NR1H3/TLR4/SPACA3/THBS1/TREX1/AZU1/SNCA/IL1RL1/IL33/HAMP	41
BP	GO:0002819	regulation of adaptive immune response	62/2932	198/18903	1.69382e-08	1.21274e-06	9.9498e-07	FCGR1A/IL7R/IL10/GATA3/LILRB4/BATF/ANXA1/B2M/IL18/IL27/JAK3/CEACAM1/SAMSN1/MAD2L2/CD28/CR2/FADD/TNFSF13B/NECTIN2/TNFSF13/ARG1/FUT7/PLA2G4A/JUNB/IRF7/CD55/PYCARD/ZBTB7B/IL18R1/SLC11A1/IL4R/BCL6/CD274/CR1/HLA-A/ARID5A/SUSD4/CLEC6A/ZC3H12A/LILRB1/HLA-H/IL1B/CR1L/FCGR2B/IRF1/TGFB1/JAK2/CD1C/CLEC4G/HLX/CD1E/NOD2/RSAD2/MIR21/IL1R1/IL23R/SLC22A13/HLA-G/EPHB2/IL1RL1/IL33/ALOX15	62
BP	GO:0002718	regulation of cytokine production involved in immune response	43/2932	118/18903	2.03827e-08	1.42634e-06	1.17023e-06	MYD88/IL10/GATA3/LILRB4/CD96/B2M/IL18/JAK3/FFAR3/BST2/ARG1/TGFB3/FFAR2/CD55/PYCARD/IL18R1/UBE2J1/BCL6/IRAK3/HLA-A/ARID5A/ANGPT1/LILRB1/RABGEF1/IL1B/KIT/HMOX1/SLC7A5/TGFB1/TRIM6/LITAF/PRG2/APOA2/NOD2/RSAD2/TLR4/IL1R1/KIR2DL4/GPRC5B/INAVA/RIGI/ACP5/HLA-G	43
BP	GO:0033046	negative regulation of sister chromatid segregation	25/2932	51/18903	2.08376e-08	1.42634e-06	1.17023e-06	MAD2L1BP/ATM/MAD2L2/BIRC5/DUSP1/SPC25/AURKB/USP44/CDC20/TTK/PTTG1/BUB1/PLK1/SPC24/CDK5RAP2/ZWINT/BUB1B/CDT1/NUF2/CCNB1/TRIP13/CDCA8/HASPIN/NDC80/CENPF	25
BP	GO:0033048	negative regulation of mitotic sister chromatid segregation	25/2932	51/18903	2.08376e-08	1.42634e-06	1.17023e-06	MAD2L1BP/ATM/MAD2L2/BIRC5/DUSP1/SPC25/AURKB/USP44/CDC20/TTK/PTTG1/BUB1/PLK1/SPC24/CDK5RAP2/ZWINT/BUB1B/CDT1/NUF2/CCNB1/TRIP13/CDCA8/HASPIN/NDC80/CENPF	25
BP	GO:2000816	negative regulation of mitotic sister chromatid separation	25/2932	51/18903	2.08376e-08	1.42634e-06	1.17023e-06	MAD2L1BP/ATM/MAD2L2/BIRC5/DUSP1/SPC25/AURKB/USP44/CDC20/TTK/PTTG1/BUB1/PLK1/SPC24/CDK5RAP2/ZWINT/BUB1B/CDT1/NUF2/CCNB1/TRIP13/CDCA8/HASPIN/NDC80/CENPF	25
BP	GO:0042060	wound healing	113/2932	442/18903	2.2995e-08	1.55691e-06	1.27735e-06	CLIC1/NOG/S100A8/MYL12A/FCER1G/PPARG/CD40LG/TXK/PLSCR1/C1GALT1C1/AHNAK/CD59/ANXA1/GAS6/ILK/ST3GAL4/PHLDB2/MAPK14/CHMP5/TIMP1/CEACAM1/DGKE/EXT1/ACVRL1/DYSF/LRG1/PRKCD/SERPINA1/KANK1/TGFB3/INSL3/DST/ALOX5/EMILIN2/PLA2G4A/FERMT3/SERPINB2/PLAUR/CDKN1A/VAV1/AJAP1/COL5A1/SLC11A1/CHMP2A/WNT7A/IL24/P2RX1/CD151/PDCD10/SERPING1/PLEK/F5/TFPI/F12/ERBB3/FAP/HMOX1/GP1BB/EPB41L4B/WFDC1/ACTA2/TGFA/GPR4/TNFRSF12A…	113
BP	GO:0045841	negative regulation of mitotic metaphase/anaphase transition	24/2932	48/18903	2.43486e-08	1.63083e-06	1.338e-06	MAD2L1BP/ATM/MAD2L2/BIRC5/DUSP1/SPC25/AURKB/USP44/CDC20/TTK/BUB1/PLK1/SPC24/CDK5RAP2/ZWINT/BUB1B/CDT1/NUF2/CCNB1/TRIP13/CDCA8/HASPIN/NDC80/CENPF	24
BP	GO:0032609	interferon-gamma production	43/2932	119/18903	2.7164e-08	1.75905e-06	1.4432e-06	RASGRP1/IL10/TXK/GATA3/LILRB4/CD96/IL18/GAS6/IL27/FADD/CD14/PGLYRP1/PYCARD/IL18R1/SLC11A1/PDCD1LG2/CD274/CR1/BCL3/HLA-A/ARID5A/VSIR/ZC3H12A/LILRB1/ISG15/LGALS9/IL1B/SLC7A5/RARA/JAK2/SIRPA/CCR7/NOD2/TLR4/IL1R1/INHBA/IL23R/NLRP6/EBI3/CD276/IL1RL1/IL33/IL21	43
BP	GO:0032649	regulation of interferon-gamma production	43/2932	119/18903	2.7164e-08	1.75905e-06	1.4432e-06	RASGRP1/IL10/TXK/GATA3/LILRB4/CD96/IL18/GAS6/IL27/FADD/CD14/PGLYRP1/PYCARD/IL18R1/SLC11A1/PDCD1LG2/CD274/CR1/BCL3/HLA-A/ARID5A/VSIR/ZC3H12A/LILRB1/ISG15/LGALS9/IL1B/SLC7A5/RARA/JAK2/SIRPA/CCR7/NOD2/TLR4/IL1R1/INHBA/IL23R/NLRP6/EBI3/CD276/IL1RL1/IL33/IL21	43
BP	GO:0050764	regulation of phagocytosis	39/2932	103/18903	2.72335e-08	1.75905e-06	1.4432e-06	FCGR1A/FCER1G/ATG3/PLSCR1/GAS6/SNX3/FGR/LMAN2/DYSF/CYBA/FCN1/HCK/IL15RA/PYCARD/C2/CD300A/SLC11A1/SPHK1/TLR2/RAB31/TUB/CFP/FCN2/IL1B/PTX3/FCGR2B/MERTK/TGM2/SIRPA/APOA2/FPR2/NOD2/SPACA3/C4B/C4A/PRTN3/CCL2/AZU1/ALOX15	39
BP	GO:0002700	regulation of production of molecular mediator of immune response	59/2932	187/18903	2.74707e-08	1.75905e-06	1.4432e-06	MYD88/IL10/CD40LG/GATA3/LILRB4/CD96/B2M/IL18/JAK3/MAD2L2/CD28/FFAR3/BST2/TNFSF13/ARG1/TGFB3/FFAR2/CD55/PYCARD/IL18R1/UBE2J1/CGAS/IL4R/BCL6/IRAK3/CR1/HLA-A/ARID5A/ANGPT1/LILRB1/RABGEF1/FCRL3/IL1B/KIT/HMOX1/SLC7A5/RBP4/FCGR2B/TGFB1/TRIM6/LITAF/PRG2/APOA2/NOD2/RSAD2/TLR4/IL1R1/KIR2DL4/CD22/GPRC5B/INAVA/MZB1/RIGI/ACP5/TREX1/HLA-G/EPHB2/IL33/IL21	59
BP	GO:0071347	cellular response to interleukin-1	41/2932	111/18903	2.76749e-08	1.75905e-06	1.4432e-06	ADAMTS12/MYD88/RORA/CEBPB/NR1D1/RPS6KA5/CAMP/PYCARD/IL1RN/IL1R2/IRAK3/GBP2/HYAL2/NKX3-1/BMI1/ZC3H12A/ZBP1/IL1B/MYLK3/ACOD1/CCL24/MAPK3/GBP1/SIRPA/MIR21/IL1R1/MMP2/NLRP7/CCL8/GBP3/IRAK2/CCL2/CCL25/AKAP12/SFRP1/INHBB/ADAMTS7/CCL7/CCL23/CCL18/CCL20	41
BP	GO:0044403	biological process involved in symbiotic interaction	85/2932	307/18903	2.94567e-08	1.84129e-06	1.51067e-06	DYNLT1/LEF1/MID2/GAPDH/MYD88/IFITM1/PLSCR1/LGALS1/WWP1/CLEC5A/GAS6/SNX3/DPP4/STOM/CHMP5/CDHR3/IFITM3/CR2/CTSL/TRIM25/CTSB/NECTIN2/IFI27/ARG1/PGLYRP1/CAMP/FCN1/IFITM2/CD55/SAP30/VAPA/HPN/TRIM21/CHMP2A/FURIN/CR1/RNASEK/HYAL2/TRIM22/HAVCR1/ICAM1/ROMO1/ACE2/ZC3H12A/SELPLG/HSPA1B/CDK1/CLDN9/LGALS9/NCAM1/LTF/HSPA1A/LY6E/PPIB/PTX3/APOL1/JAK2/GYPA/CLEC4G/GSN/TRIM6/SIGLEC1/GPX1/PF4/SLC1A5/PRKN/BSG/CHMP4C/…	85
BP	GO:0030098	lymphocyte differentiation	108/2932	419/18903	2.95599e-08	1.84129e-06	1.51067e-06	BCL11B/LEF1/IL7R/RASGRP1/TCF7/CCR6/IL10/FCER1G/ZC3H8/TESPA1/CD40LG/CAMK4/GATA3/PRELID1/GBA1/LILRB4/SMARCD3/BATF/LGALS1/ANXA1/CLEC4D/B2M/IL18/GAS6/ITK/DOCK10/RORA/ATM/IL27/JAK3/CD3G/BCL2/VNN1/CD28/CR2/CTSL/FADD/TNFSF13B/ADGRG3/PGLYRP1/SEMA4A/CLEC4E/JMJD6/FUT7/JUNB/IL15RA/ZBTB7B/SPI1/VAV1/IL18R1/IL4R/BCL6/BAK1/GPR183/CR1/HMGB3/NFIL3/BCL3/THEMIS/SOCS1/NCAPH2/VSIR/HDAC4/RORC/TOX/BMI1/PNP/ZC3H12A/TCIR…	108
BP	GO:0002367	cytokine production involved in immune response	43/2932	120/18903	3.60324e-08	2.22223e-06	1.82321e-06	MYD88/IL10/GATA3/LILRB4/CD96/B2M/IL18/JAK3/FFAR3/BST2/ARG1/TGFB3/FFAR2/CD55/PYCARD/IL18R1/UBE2J1/BCL6/IRAK3/HLA-A/ARID5A/ANGPT1/LILRB1/RABGEF1/IL1B/KIT/HMOX1/SLC7A5/TGFB1/TRIM6/LITAF/PRG2/APOA2/NOD2/RSAD2/TLR4/IL1R1/KIR2DL4/GPRC5B/INAVA/RIGI/ACP5/HLA-G	43
BP	GO:1902106	negative regulation of leukocyte differentiation	40/2932	108/18903	3.72986e-08	2.27778e-06	1.86878e-06	C1QC/ZC3H8/LILRB4/ANXA1/ZBTB46/JAK3/CEACAM1/PGLYRP1/TNFAIP6/LILRB3/ZBTB7B/FSTL3/TRIB1/IL4R/BCL6/CR1/HMGB3/SOCS1/ZC3H12A/LILRB1/GPR137/LTF/RARA/FCGR2B/MDK/IRF1/CLEC4G/HLX/TLR4/MIR21/INHBA/SFRP1/CLDN18/HLA-G/PRDX2/GLI3/TMEM176A/TMEM176B/FBN1/LAG3	40
BP	GO:0016032	viral process	108/2932	421/18903	3.86734e-08	2.3388e-06	1.91885e-06	DYNLT1/LEF1/MID2/GTF2B/LAMTOR5/APOBEC3B/EDEM2/IFITM1/PLSCR1/MMP24-AS1-EDEM2/NMT2/LGALS1/WWP1/CLEC5A/SLPI/GAS6/SNX3/ST3GAL4/DPP4/STOM/CHMP5/BCL2/CDHR3/CD28/IFITM3/CR2/CTSL/TRIM25/CTSB/BST2/NECTIN2/APOBEC3A/IFI27/SRPK1/ST3GAL2/FCN1/IFITM2/IRF7/CD55/VAPA/HPN/PARP9/TRIM21/IFI16/CHMP2A/FURIN/CR1/ZFP36/MDFIC/RNASEK/HYAL2/TNIP1/OAS1/TRIM22/HAVCR1/ICAM1/ACE2/ZC3H12A/RAB1B/SELPLG/HSPA1B/PARP10/CDK1/CLDN9/…	108
BP	GO:0070661	leukocyte proliferation	93/2932	348/18903	4.33329e-08	2.59539e-06	2.12936e-06	LEF1/IL7R/RASGRP1/MYD88/BST1/IL10/CD40LG/GBA1/LILRB4/NFATC2/ANXA1/IL18/FKBP1B/ATM/IL27/JAK3/BCL2/CD28/CR2/AIF1/FADD/TYROBP/TNFSF13B/BST2/PRKCD/CEBPB/ARG1/JUNB/CD55/CCND3/PYCARD/ZBTB7B/CDKN1A/CLU/CD300A/VSIG4/SLC11A1/BCL6/PDCD1LG2/CD274/GPR183/CR1/RAC2/HLA-A/IGFBP2/VSIR/CD151/CSF2RA/BMI1/PNP/TCIRG1/DLG5/SELENOK/LILRB1/FCRL3/LGALS9/IL1B/KIT/FCGR2B/IRF1/MAPK3/JAK2/CLEC4G/LST1/TNFRSF13C/TLR4/PSMB10/E…	93
BP	GO:0019731	antibacterial humoral response	28/2932	63/18903	4.49851e-08	2.62976e-06	2.15756e-06	H2BC21/H2BC12/SLPI/CAMP/H2BC6/HLA-A/ANG/LTF/H2BC8/H2BC12L/RNASE3/DEFA3/H2BC4/NOD2/DEFB1/H2BC11/CTSG/ELANE/H2BC7/DEFA1B/DEFA4/DEFA1/IGKV3-20/JCHAIN/PI3/IGHA2/DEFA5/IGHA1	28
BP	GO:0051784	negative regulation of nuclear division	28/2932	63/18903	4.49851e-08	2.62976e-06	2.15756e-06	MAD2L1BP/ATM/MAD2L2/AURKAIP1/BIRC5/DUSP1/SPC25/AURKB/USP44/CDC20/TTK/BUB1/PLK1/SPC24/CDK5RAP2/ZWINT/BUB1B/CDT1/NUF2/CCNB1/FBXO43/TRIP13/CHEK1/CDCA8/HASPIN/NDC80/CENPF/LIF	28
BP	GO:0045839	negative regulation of mitotic nuclear division	26/2932	56/18903	4.51733e-08	2.62976e-06	2.15756e-06	MAD2L1BP/ATM/MAD2L2/AURKAIP1/BIRC5/DUSP1/SPC25/AURKB/USP44/CDC20/TTK/BUB1/PLK1/SPC24/CDK5RAP2/ZWINT/BUB1B/CDT1/NUF2/CCNB1/TRIP13/CHEK1/CDCA8/HASPIN/NDC80/CENPF	26
BP	GO:0072593	reactive oxygen species metabolic process	69/2932	235/18903	4.90922e-08	2.83144e-06	2.32303e-06	HP/FOXO1/BST1/CD177/GADD45A/ITGAM/PRDX1/MAPK14/BCL2/NCF4/TYROBP/TSPO/PRKCD/MMP8/PRDX5/CYBA/IMMP2L/ALOX5/SH3PXD2B/ABCD2/CDKN1A/VAV1/RAC2/NCF1C/FBLN5/NCF1B/ABCD1/IFI6/ROMO1/ACE2/ZC3H12A/NDUFA13/PLIN5/NDUFS4/NCF1/MAOB/IL19/ACOD1/CBS/TGFB1/PRDX4/CCN2/PINK1/LOC102724560/FPR2/CYP1B1/GCH1/GPX1/TLR4/MPO/PRG3/PID1/MIR21/PRKN/HBM/AKR1C1/INAVA/ACP5/THBS1/PRDX2/CYP1A1/SNCA/HBD/H19/HBB/LPO/HBQ1/HBG1/HBG2	69
BP	GO:1903900	regulation of viral life cycle	48/2932	142/18903	4.96622e-08	2.83804e-06	2.32844e-06	MID2/APOBEC3B/IFITM1/PLSCR1/LGALS1/SLPI/SNX3/BCL2/CD28/IFITM3/TRIM25/BST2/NECTIN2/APOBEC3A/SRPK1/FCN1/IFITM2/TRIM21/IFI16/FURIN/TNIP1/OAS1/TRIM22/PARP10/ISG15/LGALS9/LTF/OASL/LY6E/PTX3/TOP2A/EIF2AK2/CLEC4G/GSN/TRIM6/ISG20/RSAD2/OAS3/LAMP3/IFIT1/MX1/OAS2/IFIH1/TRIM10/IFIT5/TMPRSS2/AICDA/TRIM15	48
BP	GO:0051985	negative regulation of chromosome segregation	25/2932	53/18903	5.5262e-08	3.10114e-06	2.5443e-06	MAD2L1BP/ATM/MAD2L2/BIRC5/DUSP1/SPC25/AURKB/USP44/CDC20/TTK/PTTG1/BUB1/PLK1/SPC24/CDK5RAP2/ZWINT/BUB1B/CDT1/NUF2/CCNB1/TRIP13/CDCA8/HASPIN/NDC80/CENPF	25
BP	GO:1905819	negative regulation of chromosome separation	25/2932	53/18903	5.5262e-08	3.10114e-06	2.5443e-06	MAD2L1BP/ATM/MAD2L2/BIRC5/DUSP1/SPC25/AURKB/USP44/CDC20/TTK/PTTG1/BUB1/PLK1/SPC24/CDK5RAP2/ZWINT/BUB1B/CDT1/NUF2/CCNB1/TRIP13/CDCA8/HASPIN/NDC80/CENPF	25
BP	GO:0022407	regulation of cell-cell adhesion	121/2932	490/18903	6.08672e-08	3.3852e-06	2.77735e-06	ETS1/LEF1/IL7R/RASGRP1/IL10/ZC3H8/TESPA1/CD40LG/DUSP3/GATA3/LILRB4/CCL28/SMARCD3/LGALS1/ANXA1/B2M/IL18/FLOT1/ST3GAL4/DPP4/MAPK14/JAK3/VNN1/CEACAM1/MAD2L2/CD28/FLOT2/AIF1/FADD/ANK3/TNFSF13B/PRKCD/CEBPB/MYO10/ARG1/ALOX5/FUT7/EMILIN2/CD55/FERMT3/PYCARD/PLAUR/ZBTB7B/SPI1/VAV1/IL1RN/FSTL3/CD300A/VSIG4/IL4R/TNFAIP8L2/BCL6/CD5/PDCD1LG2/CD274/CR1/HLA-A/SOCS1/IGFBP2/VSIR/BMI1/PNP/TRPV4/ZC3H12A/CELSR2/DLG5…	121
BP	GO:0002822	regulation of adaptive immune response based on somatic recombination of immune receptors built from immunoglobulin superfamily domains	57/2932	182/18903	6.25254e-08	3.41529e-06	2.80204e-06	FCGR1A/IL7R/IL10/GATA3/LILRB4/BATF/ANXA1/B2M/IL18/IL27/JAK3/CEACAM1/MAD2L2/CD28/CR2/FADD/TNFSF13B/NECTIN2/TNFSF13/ARG1/FUT7/PLA2G4A/JUNB/CD55/ZBTB7B/IL18R1/SLC11A1/IL4R/BCL6/CD274/CR1/HLA-A/ARID5A/SUSD4/CLEC6A/ZC3H12A/LILRB1/HLA-H/IL1B/CR1L/FCGR2B/TGFB1/JAK2/CD1C/CLEC4G/HLX/CD1E/NOD2/RSAD2/MIR21/IL1R1/IL23R/SLC22A13/HLA-G/EPHB2/IL1RL1/IL33	57
BP	GO:0002573	myeloid leukocyte differentiation	65/2932	218/18903	6.29276e-08	3.41529e-06	2.80204e-06	LEF1/C1QC/PPARG/CAMK4/GATA3/GBA1/LILRB4/BATF/OSCAR/ZBTB46/MAPK14/DHRS7B/CEACAM1/TFE3/FADD/TYROBP/FES/MMP9/CEBPB/LTBR/TNFAIP6/LILRB3/JUNB/IRF7/CEBPA/SPI1/PDE1B/SBNO2/FSTL3/BATF2/TRIB1/IFI16/GPR183/SOCS1/MT1G/FAM20C/PIR/TCIRG1/CCR1/TLR2/LILRB1/MIR223/GPR137/LTF/KIT/RARA/RELB/TGFB1/CEBPE/CCR7/TLR4/PF4/INHBA/IL23R/BATF3/PRTN3/GPC3/SFRP1/CLDN18/ITGB8/TAL1/EPHA2/GATA1/LIF/FBN1	65
BP	GO:0070663	regulation of leukocyte proliferation	76/2932	269/18903	6.30532e-08	3.41529e-06	2.80204e-06	MYD88/BST1/IL10/CD40LG/LILRB4/NFATC2/ANXA1/IL18/ATM/IL27/JAK3/BCL2/CD28/AIF1/FADD/TYROBP/TNFSF13B/BST2/CEBPB/ARG1/CD55/PYCARD/ZBTB7B/CDKN1A/CD300A/VSIG4/BCL6/PDCD1LG2/CD274/GPR183/CR1/RAC2/HLA-A/IGFBP2/VSIR/CSF2RA/BMI1/PNP/DLG5/SELENOK/LILRB1/FCRL3/LGALS9/IL1B/KIT/FCGR2B/IRF1/MAPK3/JAK2/CLEC4G/LST1/TNFRSF13C/TLR4/ENPP3/MIR21/LGALS3/IDO1/CD22/IL23R/SPTA1/CCL8/MZB1/GAL/EBI3/HLA-G/EPHB2/CD276/CD24/I…	76
BP	GO:0071346	cellular response to interferon-gamma	42/2932	118/18903	6.44612e-08	3.46146e-06	2.83992e-06	GAPDH/PPARG/TXK/CASP1/RAB20/NMI/IFNGR2/AIF1/CD58/ARG1/IFNGR1/SLC26A6/HCK/STXBP4/PARP9/GBP2/SOCS1/ZYX/TLR2/LGALS9/RAB43/ACOD1/CCL24/IRF1/JAK2/GBP1/GBP6/GSN/NR1H3/SIRPA/TLR4/GBP5/CCL8/ASS1/GBP3/CCL2/CCL25/CCL7/CCL23/GBP4/CCL18/CCL20	42
BP	GO:1903707	negative regulation of hemopoiesis	41/2932	114/18903	6.60097e-08	3.51431e-06	2.88328e-06	C1QC/ZC3H8/LILRB4/ANXA1/ZBTB46/JAK3/CEACAM1/PGLYRP1/TNFAIP6/LILRB3/CEBPA/ZBTB7B/FSTL3/TRIB1/IL4R/BCL6/CR1/HMGB3/SOCS1/ZC3H12A/LILRB1/GPR137/LTF/RARA/FCGR2B/MDK/IRF1/CLEC4G/HLX/TLR4/MIR21/INHBA/SFRP1/CLDN18/HLA-G/PRDX2/GLI3/TMEM176A/TMEM176B/FBN1/LAG3	41
BP	GO:1902100	negative regulation of metaphase/anaphase transition of cell cycle	24/2932	50/18903	6.67957e-08	3.52602e-06	2.89289e-06	MAD2L1BP/ATM/MAD2L2/BIRC5/DUSP1/SPC25/AURKB/USP44/CDC20/TTK/BUB1/PLK1/SPC24/CDK5RAP2/ZWINT/BUB1B/CDT1/NUF2/CCNB1/TRIP13/CDCA8/HASPIN/NDC80/CENPF	24
BP	GO:0002701	negative regulation of production of molecular mediator of immune response	23/2932	47/18903	7.95907e-08	4.13142e-06	3.38959e-06	IL10/LILRB4/CD96/JAK3/BST2/ARG1/TGFB3/BCL6/IRAK3/CR1/ANGPT1/LILRB1/RABGEF1/FCRL3/HMOX1/FCGR2B/TGFB1/PRG2/APOA2/NOD2/CD22/ACP5/IL33	23
BP	GO:0097028	dendritic cell differentiation	23/2932	47/18903	7.95907e-08	4.13142e-06	3.38959e-06	CAMK4/BATF/TRPM2/GAS6/ZBTB46/CEBPB/LTBR/SPI1/BATF2/LILRB1/LGALS9/MIR223/RELB/FCGR2B/CCR7/BATF3/PRTN3/FLT3/HLA-G/ITGB8/GATA1/TMEM176A/TMEM176B	23
BP	GO:0050792	regulation of viral process	52/2932	162/18903	9.64067e-08	4.95313e-06	4.06375e-06	DYNLT1/MID2/APOBEC3B/IFITM1/PLSCR1/LGALS1/SLPI/SNX3/STOM/BCL2/CD28/IFITM3/TRIM25/BST2/NECTIN2/APOBEC3A/SRPK1/FCN1/IFITM2/TRIM21/IFI16/FURIN/ZFP36/MDFIC/TNIP1/OAS1/TRIM22/PARP10/ISG15/LGALS9/LTF/OASL/LY6E/PTX3/TOP2A/EIF2AK2/CLEC4G/GSN/TRIM6/ISG20/RSAD2/OAS3/LAMP3/IFIT1/MX1/OAS2/IFIH1/TRIM10/IFIT5/TMPRSS2/AICDA/TRIM15	52
BP	GO:1903706	regulation of hemopoiesis	105/2932	413/18903	9.70111e-08	4.95313e-06	4.06375e-06	KAT6B/ETS1/LEF1/IL7R/RASGRP1/TCF7/C1QC/HMGB2/IL10/ZC3H8/TESPA1/CAMK4/GATA3/PRELID1/LILRB4/SMARCD3/BATF/ANXA1/H4C8/B2M/IL18/GAS6/H4C4/ZBTB46/MAPK14/IL27/JAK3/VNN1/CEACAM1/CD28/TFE3/FADD/TYROBP/FES/CEBPB/PGLYRP1/TNFAIP6/LILRB3/JUNB/IRF7/CEBPA/IL15RA/ZBTB7B/SPI1/FSTL3/TRIB1/IL4R/BCL6/ACVR1B/CR1/HMGB3/ZFP36/SOCS1/H4C11/VSIR/TOX/PNP/ZC3H12A/CCR1/NFAM1/H4C12/H4C5/BAD/LILRB1/HSPA1B/FCRL3/ISG15/LGALS9/MI…	105
BP	GO:0052547	regulation of peptidase activity	114/2932	459/18903	1.05762e-07	5.33331e-06	4.37567e-06	EPHA4/S100A9/S100A8/AIM2/GAPDH/LAMTOR5/NLRC4/PPARG/PRELID1/CST7/CASP1/RECK/CSTA/SERPINB1/CARD16/NOL3/SLPI/GAS6/CSTB/SPOCK2/GPER1/TIMP1/CTSH/NAIP/CTSD/PSMB8/TNFSF10/CDKN2D/CTSB/FADD/BST2/GRN/MMP9/RHBDF2/SERPINB10/SERPINA1/CARD17P/PRDX5/ACVR1C/ARRB2/POR/PSENEN/SERPINB2/PYCARD/PLAUR/PCOLCE2/IFI16/BAK1/FURIN/CR1/NKX3-1/SIAH2/P2RX1/VSIR/PSMB9/MICAL1/IFI6/TIMP4/SERPING1/NDUFA13/RENBP/BIRC5/BAD/PML/NLRP…	114
BP	GO:0001906	cell killing	58/2932	189/18903	1.0617e-07	5.33331e-06	4.37567e-06	FCGR1A/IL7R/S100A12/RASGRP1/GAPDH/MYD88/H2BC12/CD59/B2M/IL18/ITGAM/PRDX1/CTSH/CEACAM1/FADD/TYROBP/NECTIN2/ARG1/PGLYRP1/STXBP2/ARRB2/CD55/SPI1/VAV1/TUBB4B/KLRC4/HLA-A/ICAM1/ROMO1/LILRB1/LGALS9/LTF/HLA-H/CR1L/FCGR2B/CD1C/DEFA3/CD1E/KIR2DL4/H2BC11/IL23R/DNASE1L3/CTSG/ELANE/IGHG1/DEFA1B/SLC22A13/DEFA4/DEFA1/NLRP6/HLA-G/AZU1/BCL2L1/DEFA5/HAMP/LAG3/SCNN1B/IL21	58
BP	GO:0050866	negative regulation of cell activation	65/2932	221/18903	1.10683e-07	5.51553e-06	4.52517e-06	IL10/ZC3H8/DUSP3/MILR1/CST7/LILRB4/ANXA1/ATM/ZBTB46/GPER1/JAK3/CEACAM1/SAMSN1/FGR/TYROBP/GRN/PRKCD/CEBPB/NR1D1/ARG1/PGLYRP1/ZBTB7B/SPI1/CD300A/VSIG4/IL4R/TNFAIP8L2/BCL6/PDCD1LG2/CD274/CR1/HMGB3/SOCS1/VSIR/BPI/ZC3H12A/DLG5/LILRB1/TARM1/RABGEF1/LGALS9/HMOX1/FCGR2B/MDK/IRF1/CLEC4G/LST1/MERTK/NR1H3/HLX/ENPP3/MIR21/ADORA2A/LGALS3/INHBA/IDO1/CTSG/SFRP1/GAL/HLA-G/PRDX2/GLI3/LAG3/APOE/TNFRSF13B	65
BP	GO:0002832	negative regulation of response to biotic stimulus	41/2932	116/18903	1.14995e-07	5.68496e-06	4.66417e-06	UFD1/PPARG/CARD16/RNF125/CD96/NMI/NLRC3/CEACAM1/GRN/ARG1/ARRB2/TRIM21/VSIG4/TRIB1/IFI16/IRAK3/CR1/HLA-A/OAS1/SUSD4/TRAFD1/SERPING1/LILRB1/ISG15/LGALS9/LTF/LILRA2/ACOD1/NR1H3/USP18/MIR21/RIOK3/KIR2DL4/SLAMF8/OAS3/DHX58/TSPAN6/TREX1/HTRA1/HLA-G/PRDX2	41
BP	GO:0002685	regulation of leukocyte migration	67/2932	231/18903	1.27377e-07	6.24749e-06	5.1257e-06	MYD88/CCR6/BST1/CCL28/C3AR1/ANXA1/GCSAM/GAS6/ST3GAL4/DPP4/AIF1/CYP19A1/FADD/MTUS1/TNFAIP6/FUT7/RHOG/PYCARD/SPI1/CD300A/RAC2/ICAM1/TRPV4/CCR1/GPSM3/SELENOK/RABGEF1/DUSP1/PDGFD/LGALS9/MIR223/CD200R1/CCN3/HMOX1/MPP1/MMP28/CCL24/MDK/PADI2/RIN3/MAPK3/CXCL10/ADAM8/CXCL17/DDT/CCR7/FPR2/NOD2/SELP/PGF/MMP14/LGALS3/IL1R1/SLAMF8/ECM1/CCL8/ELANE/CCL2/CCL25/LYVE1/THBS1/CXCL12/CCL7/IL1A/IL33/APOD/CCL20	67
BP	GO:0045824	negative regulation of innate immune response	31/2932	77/18903	1.40622e-07	6.84324e-06	5.61447e-06	PPARG/CD96/NMI/NLRC3/CEACAM1/GRN/ARG1/ARRB2/TRIM21/VSIG4/IFI16/IRAK3/CR1/HLA-A/OAS1/SUSD4/TRAFD1/SERPING1/LILRB1/ISG15/LGALS9/ACOD1/NR1H3/USP18/MIR21/KIR2DL4/SLAMF8/OAS3/DHX58/TREX1/HLA-G	31
BP	GO:0046718	viral entry into host cell	49/2932	151/18903	1.53425e-07	7.40843e-06	6.07818e-06	DYNLT1/MID2/IFITM1/PLSCR1/LGALS1/WWP1/CLEC5A/GAS6/SNX3/DPP4/CDHR3/IFITM3/CR2/CTSL/TRIM25/CTSB/NECTIN2/FCN1/IFITM2/CD55/TRIM21/FURIN/CR1/RNASEK/HYAL2/TRIM22/HAVCR1/ICAM1/ACE2/SELPLG/HSPA1B/CDK1/CLDN9/LGALS9/NCAM1/HSPA1A/LY6E/PTX3/GYPA/CLEC4G/GSN/TRIM6/SIGLEC1/SLC1A5/BSG/CAV1/TRIM10/TMPRSS2/EPHA2	49
BP	GO:0002699	positive regulation of immune effector process	73/2932	261/18903	1.76492e-07	8.45669e-06	6.93821e-06	FCGR1A/RASGRP1/MYD88/IL10/CD177/GATA3/ANXA1/B2M/IL18/ITGAM/MAD2L2/FGR/CD28/FFAR3/FADD/TYROBP/FES/NECTIN2/TNFSF13/ARG1/FCN1/STXBP2/FFAR2/CD55/PYCARD/SPI1/VAV1/IL18R1/CD300A/KLRC4/IL4R/CR1/RAC2/HLA-A/ARID5A/LILRB1/RABGEF1/CFP/FCN2/LGALS9/HLA-H/IL1B/KIT/HMOX1/SLC7A5/RARA/RBP4/TGFB1/CD1C/TRIM6/HLX/CD1E/NOD2/RSAD2/TLR4/ENPP3/MIR21/IL1R1/KIR2DL4/IL23R/GPRC5B/INAVA/MZB1/DHX58/SLC22A13/RIGI/HLA-G/EPHB2/G…	73
BP	GO:0046631	alpha-beta T cell activation	54/2932	174/18903	1.91857e-07	9.12273e-06	7.48466e-06	BCL11B/LEF1/GATA3/LILRB4/BATF/ANXA1/IL18/ITK/RORA/IL27/JAK3/CD3G/BCL2/CD28/CTSL/SEMA4A/FUT7/JUNB/CD55/ZBTB7B/IL18R1/CD300A/IL4R/BCL6/CD274/GPR183/BCL3/HLA-A/SOCS1/VSIR/RORC/TOX/PNP/ZC3H12A/TCIRG1/LILRB1/TARM1/LGALS9/RARA/RELB/ENTPD7/IRF1/EOMES/JAK2/CLEC4G/HLX/RSAD2/MIR21/ADORA2A/IL23R/EBI3/GLI3/TMEM98/IL21	54
BP	GO:0033047	regulation of mitotic sister chromatid segregation	25/2932	56/18903	2.11544e-07	9.98264e-06	8.19016e-06	MAD2L1BP/ATM/MAD2L2/BIRC5/DUSP1/SPC25/AURKB/USP44/CDC20/TTK/PTTG1/BUB1/PLK1/SPC24/CDK5RAP2/ZWINT/BUB1B/CDT1/NUF2/CCNB1/TRIP13/CDCA8/HASPIN/NDC80/CENPF	25
BP	GO:0031638	zymogen activation	28/2932	67/18903	2.21486e-07	1.03732e-05	8.51059e-06	HP/NLRC4/HPR/PGK1/CTSZ/CTSH/CTSL/FADD/PLGRKT/PYCARD/PLAUR/HPN/C1RL/GGT1/IFI16/BAK1/FURIN/VSIR/BAD/F12/ASPH/C1R/CLEC3B/PLAU/MMP14/NLRP6/THBS1/KLK2	28
BP	GO:0030217	T cell differentiation	80/2932	296/18903	2.24996e-07	1.0459e-05	8.58096e-06	BCL11B/LEF1/IL7R/RASGRP1/TCF7/CCR6/FCER1G/ZC3H8/TESPA1/CAMK4/GATA3/PRELID1/GBA1/LILRB4/SMARCD3/BATF/ANXA1/CLEC4D/B2M/IL18/ITK/RORA/IL27/JAK3/CD3G/BCL2/VNN1/CD28/CTSL/FADD/SEMA4A/CLEC4E/JMJD6/FUT7/JUNB/ZBTB7B/SPI1/VAV1/IL18R1/IL4R/BCL6/GPR183/CR1/BCL3/THEMIS/SOCS1/NCAPH2/VSIR/RORC/TOX/BMI1/PNP/ZC3H12A/TCIRG1/BAD/LGALS9/IL1B/KIT/RARA/RELB/ENTPD7/MDK/IRF1/EOMES/CLEC4G/HLA-DOA/ADAM8/CCR7/HLX/RSAD2/MI…	80
BP	GO:0042088	T-helper 1 type immune response	22/2932	46/18903	2.5476e-07	1.17548e-05	9.64412e-06	LEF1/ANXA1/IL18/IL27/JAK3/SEMA4A/PLA2G4A/IL18R1/SLC11A1/IL4R/BCL3/ARID5A/IL1B/RELB/HLX/TLR4/IL1R1/IL23R/EBI3/IL1RL1/IL33/TMEM98	22
BP	GO:0050863	regulation of T cell activation	96/2932	376/18903	2.75263e-07	1.26074e-05	1.03437e-05	LEF1/IL7R/RASGRP1/TCF7/IL10/ZC3H8/TESPA1/CD40LG/CAMK4/DUSP3/GATA3/PRELID1/LILRB4/SMARCD3/BATF/LGALS1/ANXA1/B2M/IL18/DPP4/IL27/JAK3/VNN1/CEACAM1/CD28/FLOT2/AIF1/FADD/TNFSF13B/CEBPB/ARG1/JUNB/CD55/PYCARD/ZBTB7B/VAV1/CD300A/CGAS/VSIG4/IL4R/TNFAIP8L2/BCL6/CD5/PDCD1LG2/CD274/CR1/RAC2/HLA-A/SOCS1/IGFBP2/VSIR/TOX/BMI1/PNP/ZC3H12A/DLG5/SELENOK/BAD/LILRB1/TARM1/LGALS9/IL1B/RARA/FCGR2B/MDK/IRF1/JAK2/CLEC4G…	96
BP	GO:0002292	T cell differentiation involved in immune response	31/2932	79/18903	2.78984e-07	1.26846e-05	1.0407e-05	LEF1/FCER1G/GATA3/BATF/ANXA1/CLEC4D/IL18/RORA/IL27/JAK3/SEMA4A/CLEC4E/JUNB/ZBTB7B/IL18R1/IL4R/BCL6/GPR183/BCL3/RORC/ZC3H12A/LGALS9/RARA/RELB/ENTPD7/EOMES/HLX/MIR21/IL23R/TMEM98/IL21	31
BP	GO:0051783	regulation of nuclear division	47/2932	145/18903	2.8315e-07	1.27807e-05	1.04858e-05	MAD2L1BP/ATM/MAD2L2/CD28/AURKAIP1/SPHK1/PKMYT1/DLGAP5/BIRC5/DUSP1/SPC25/AURKB/CDC25C/USP44/CDC20/PIWIL2/IL1B/TTK/TGFA/NUSAP1/CDCA2/BUB1/PLK1/SPC24/ESPL1/AURKA/CDK5RAP2/MKI67/NEK2/ZWINT/BUB1B/CDT1/NUF2/CCNB1/FBXO43/TRIP13/CHEK1/CDCA8/HASPIN/NDC80/EGF/CENPF/RAD51AP1/LIF/IL1A/IGF2/IGF1	47
BP	GO:0022409	positive regulation of cell-cell adhesion	85/2932	322/18903	2.89137e-07	1.29571e-05	1.06305e-05	ETS1/LEF1/IL7R/RASGRP1/IL10/TESPA1/CD40LG/GATA3/LILRB4/SMARCD3/LGALS1/ANXA1/B2M/IL18/FLOT1/ST3GAL4/DPP4/JAK3/VNN1/CD28/FLOT2/AIF1/FADD/ANK3/TNFSF13B/MYO10/ALOX5/FUT7/EMILIN2/CD55/PYCARD/PLAUR/ZBTB7B/VAV1/FSTL3/IL4R/BCL6/CD5/PDCD1LG2/CD274/CR1/HLA-A/SOCS1/IGFBP2/VSIR/BMI1/PNP/SELENOK/BAD/LILRB1/LGALS9/IL1B/RARA/MDK/JAK2/HLA-DOA/ADAM8/SIRPA/CCR7/TNFRSF13C/HLX/NOD2/SELP/MIR21/IL23R/SPTA1/CTSG/CAV1/E…	85
BP	GO:0009636	response to toxic substance	70/2932	250/18903	2.99368e-07	1.33197e-05	1.09281e-05	GSTO1/TXN/S100A9/EPHX2/HP/MGST1/TXNDC17/ABCB1/NUPR1/PRDX1/BCL2/SLC30A4/ALOX5AP/ARG1/PRDX5/MTARC1/BAK1/MT2A/FBLN5/MT1E/MT1G/MPST/TLR2/CES1/MT1F/CDK1/GSTM3/SCN9A/MAOB/GUCY2C/PRDX4/CLIC2/PINK1/TXNRD3/MIR451A/AQP10/ABCB6/CYP1B1/MT1H/GCH1/SDC1/GPX1/MPO/SLC22A18/MIR21/PRKN/MT1X/HBM/NEFL/ASS1/SCN2B/ABCG2/RAD51/TYMS/CPS1/INHBB/GATA6/PRDX2/PTGES/CYP1A1/HBD/GJC2/ALB/H19/HBB/LPO/APOE/HBQ1/HBG1/HBG2	70
BP	GO:0070555	response to interleukin-1	46/2932	141/18903	3.05556e-07	1.34986e-05	1.10748e-05	ADAMTS12/MYD88/ANXA1/RORA/CEBPB/NR1D1/CYBA/RPS6KA5/CAMP/PYCARD/IL1RN/IL1R2/IRAK3/GBP2/HYAL2/NKX3-1/HDAC4/BMI1/ZC3H12A/ZBP1/LGALS9/IL1B/MYLK3/ACOD1/CCL24/MAPK3/GBP1/SIRPA/MIR21/IL1R1/MMP2/NLRP7/CCL8/GBP3/IRAK2/CCL2/CCL25/AKAP12/SFRP1/INHBB/ADAMTS7/SNCA/CCL7/CCL23/CCL18/CCL20	46
BP	GO:1903037	regulation of leukocyte cell-cell adhesion	96/2932	377/18903	3.13951e-07	1.37719e-05	1.1299e-05	ETS1/LEF1/IL7R/RASGRP1/IL10/ZC3H8/TESPA1/CD40LG/DUSP3/GATA3/LILRB4/CCL28/SMARCD3/LGALS1/ANXA1/B2M/IL18/ST3GAL4/DPP4/JAK3/VNN1/CEACAM1/CD28/FLOT2/AIF1/FADD/TNFSF13B/CEBPB/ARG1/ALOX5/FUT7/CD55/PYCARD/ZBTB7B/VAV1/CD300A/VSIG4/IL4R/TNFAIP8L2/BCL6/CD5/PDCD1LG2/CD274/CR1/HLA-A/SOCS1/IGFBP2/VSIR/BMI1/PNP/ZC3H12A/DLG5/SELENOK/BAD/LILRB1/TARM1/LGALS9/IL1B/RARA/FCGR2B/MDK/IRF1/JAK2/CLEC4G/HLA-DOA/ADAM8/SIR…	96
BP	GO:0007162	negative regulation of cell adhesion	82/2932	308/18903	3.17452e-07	1.3828e-05	1.13451e-05	EPHA4/IL10/ZC3H8/DUSP3/LILRB4/CCL28/ANXA1/PHLDB2/SEMA5A/JAK3/CEACAM1/MAD2L2/ADAM22/ACVRL1/PRKCD/CEBPB/ARG1/KANK1/ZBTB7B/SPI1/IL1RN/AJAP1/DAB1/CD300A/VSIG4/IL4R/TNFAIP8L2/BCL6/PDCD1LG2/CD274/CR1/SOCS1/MUC1/VSIR/TRPV4/ZC3H12A/DLG5/ANGPT1/LILRB1/TARM1/DUSP1/ERBB3/LGALS9/DLC1/FCGR2B/MDK/NEXMIF/IRF1/TNR/TGFB1/JAK2/GBP1/CLEC4G/HLX/CYP1B1/PLXNA4/CORO2B/MIR21/MMP14/ADORA2A/LGALS3/FZD4/IDO1/MMP2/ASS1/CTSG…	82
BP	GO:0052548	regulation of endopeptidase activity	106/2932	428/18903	3.40582e-07	1.47325e-05	1.20872e-05	EPHA4/S100A9/S100A8/AIM2/GAPDH/LAMTOR5/NLRC4/PPARG/PRELID1/CST7/CASP1/RECK/CSTA/SERPINB1/CARD16/NOL3/SLPI/GAS6/CSTB/SPOCK2/GPER1/TIMP1/CTSH/NAIP/CTSD/PSMB8/TNFSF10/CDKN2D/FADD/BST2/MMP9/RHBDF2/SERPINB10/SERPINA1/CARD17P/PRDX5/ACVR1C/ARRB2/POR/PSENEN/SERPINB2/PYCARD/PLAUR/IFI16/BAK1/FURIN/CR1/NKX3-1/SIAH2/P2RX1/VSIR/PSMB9/MICAL1/IFI6/TIMP4/SERPING1/NDUFA13/RENBP/BIRC5/BAD/PML/NLRP12/TFPI/ST20/LGAL…	106
BP	GO:0002275	myeloid cell activation involved in immune response	35/2932	96/18903	4.04629e-07	1.73823e-05	1.42612e-05	ANXA3/RASGRP1/MYD88/FCER1G/CD177/MILR1/NMI/ITGAM/FGR/LAT2/DYSF/TYROBP/FES/GRN/IFI35/STXBP2/PYCARD/SPI1/SBNO2/CD300A/IL4R/RAC2/PTGDR/RABGEF1/SUCNR1/LGALS9/KIT/HMOX1/LILRA2/ENPP3/DNASE1L3/TREX1/GATA1/IL33/SCNN1B	35
BP	GO:0046632	alpha-beta T cell differentiation	40/2932	117/18903	4.49077e-07	1.90665e-05	1.56429e-05	BCL11B/LEF1/GATA3/LILRB4/BATF/ANXA1/IL18/ITK/RORA/IL27/JAK3/BCL2/CTSL/SEMA4A/FUT7/JUNB/ZBTB7B/IL18R1/IL4R/BCL6/GPR183/BCL3/SOCS1/RORC/TOX/PNP/ZC3H12A/LGALS9/RARA/RELB/ENTPD7/IRF1/EOMES/HLX/RSAD2/MIR21/IL23R/GLI3/TMEM98/IL21	40
BP	GO:0032944	regulation of mononuclear cell proliferation	68/2932	243/18903	4.49955e-07	1.90665e-05	1.56429e-05	MYD88/BST1/IL10/CD40LG/LILRB4/NFATC2/ANXA1/IL18/ATM/IL27/JAK3/BCL2/CD28/AIF1/FADD/TYROBP/TNFSF13B/CEBPB/ARG1/CD55/PYCARD/ZBTB7B/CDKN1A/CD300A/VSIG4/BCL6/PDCD1LG2/CD274/GPR183/CR1/RAC2/HLA-A/IGFBP2/VSIR/BMI1/PNP/DLG5/SELENOK/LILRB1/FCRL3/LGALS9/IL1B/FCGR2B/IRF1/JAK2/CLEC4G/LST1/TNFRSF13C/TLR4/MIR21/LGALS3/IDO1/CD22/IL23R/SPTA1/MZB1/GAL/EBI3/HLA-G/EPHB2/CD276/CD24/IL1A/BCL2L1/IGF2/IGF1/TNFRSF13B/IL…	68
BP	GO:0071621	granulocyte chemotaxis	43/2932	130/18903	4.79419e-07	2.01777e-05	1.65546e-05	S100A9/S100A8/S100A12/BST1/FCER1G/CKLF/C3AR1/ANXA1/DPP4/TNFAIP6/VAV1/IL17RA/RAC2/TRPV4/PPBP/MIR223/CSF3R/IL1B/PPIB/MPP1/CCL24/MDK/MAPK3/CXCR1/CXCL10/CXCL17/CCR7/NOD2/PF4/LGALS3/BSG/CCL8/ITGA9/CCL2/CCL25/CXCL11/PF4V1/THBS1/CCL7/CCL23/CXCL9/CCL18/CCL20	43
BP	GO:0050670	regulation of lymphocyte proliferation	67/2932	239/18903	5.07747e-07	2.12265e-05	1.74151e-05	MYD88/BST1/IL10/CD40LG/LILRB4/NFATC2/ANXA1/IL18/ATM/IL27/JAK3/BCL2/CD28/AIF1/FADD/TYROBP/TNFSF13B/CEBPB/ARG1/CD55/PYCARD/ZBTB7B/CDKN1A/CD300A/VSIG4/BCL6/PDCD1LG2/CD274/GPR183/CR1/RAC2/HLA-A/IGFBP2/VSIR/BMI1/PNP/DLG5/SELENOK/LILRB1/FCRL3/LGALS9/IL1B/FCGR2B/IRF1/JAK2/CLEC4G/LST1/TNFRSF13C/TLR4/MIR21/LGALS3/IDO1/CD22/IL23R/SPTA1/MZB1/GAL/EBI3/HLA-G/EPHB2/CD276/CD24/IL1A/IGF2/IGF1/TNFRSF13B/IL21	67
BP	GO:0061844	antimicrobial humoral immune response mediated by antimicrobial peptide	31/2932	81/18903	5.36049e-07	2.22603e-05	1.82633e-05	S100A9/S100A12/GAPDH/H2BC21/H2BC12/PGLYRP1/CAMP/H2BC6/ROMO1/ANG/PPBP/LTF/H2BC8/H2BC12L/RNASE3/DEFA3/CXCL10/H2BC4/NOD2/DEFB1/PF4/H2BC11/ELANE/H2BC7/DEFA1B/CXCL11/DEFA4/DEFA1/PF4V1/CXCL9/DEFA5	31
BP	GO:0034612	response to tumor necrosis factor	70/2932	254/18903	5.73826e-07	2.36713e-05	1.94209e-05	ADAMTS12/AIM2/TRAF5/GATA3/GBA1/CASP1/CASP4/CARD16/TXNDC17/NOL3/GAS6/ILK/RORA/GPER1/MAPK14/NAIP/EXT1/TNFSF13B/CD58/NR1D1/CD14/CYBA/CAMP/CEBPA/PYCARD/ADAM9/SPHK1/ZFP36/GBP2/HYAL2/NKX3-1/AFF3/ZC3H12A/TNFRSF1A/CXCL16/HSPA1B/HSPA1A/ACOD1/NFKBIA/CCL24/MAPK3/JAK2/GBP1/TNFRSF13C/CYP1B1/GCH1/PID1/H2BC11/PRKN/FAS/CCL8/ASS1/SHARPIN/GBP3/CCL2/CCL25/AKAP12/THBS1/SFRP1/TNFRSF17/CLDN18/ADAMTS7/COL1A1/CCL7/CCL23…	70
BP	GO:0050830	defense response to Gram-positive bacterium	40/2932	118/18903	5.78527e-07	2.37082e-05	1.94512e-05	IL7R/MYD88/HMGB2/H2BC21/CASP4/H2BC12/IL18/RNASE1/FGR/PGLYRP1/CAMP/PYCARD/H2BC6/GBP2/HLA-A/ROMO1/TLR2/GSDMD/ANG/FCN2/H2BC8/H2BC12L/IL1B/RNASE3/GBP6/DEFA3/H2BC4/NOD2/DEFB1/H2BC11/CTSG/H2BC7/DEFA1B/DEFA4/DEFA1/ACP5/NLRP6/EPHA2/GBP4/DEFA5	40
BP	GO:0051250	negative regulation of lymphocyte activation	51/2932	166/18903	5.85026e-07	2.38178e-05	1.95411e-05	IL10/ZC3H8/DUSP3/LILRB4/ANXA1/ATM/JAK3/CEACAM1/SAMSN1/FGR/TYROBP/CEBPB/ARG1/PGLYRP1/ZBTB7B/CD300A/VSIG4/IL4R/TNFAIP8L2/BCL6/PDCD1LG2/CD274/CR1/HMGB3/SOCS1/VSIR/ZC3H12A/DLG5/LILRB1/TARM1/LGALS9/FCGR2B/MDK/IRF1/CLEC4G/LST1/MERTK/HLX/MIR21/ADORA2A/LGALS3/INHBA/IDO1/CTSG/SFRP1/GAL/HLA-G/PRDX2/GLI3/LAG3/TNFRSF13B	51
BP	GO:0042119	neutrophil activation	20/2932	41/18903	5.97142e-07	2.41533e-05	1.98163e-05	ANXA3/MYD88/FCER1G/CD177/ANXA1/IL18/ITGAM/TYROBP/GRN/PRKCD/CAMP/STXBP2/SPI1/CD300A/LILRA2/FCGR2B/PRG3/DNASE1L3/CTSG/SCNN1B	20
BP	GO:0002526	acute inflammatory response	39/2932	114/18903	6.10516e-07	2.45349e-05	2.01294e-05	FCGR1A/S100A8/HP/GATA3/PLSCR1/HPR/OSM/NUPR1/VNN1/FFAR3/EXT1/CEBPB/ALOX5AP/SERPINA1/FUT7/FFAR2/EDNRB/ORM1/F12/ORM2/IL1B/CD163/MYLK3/FCGR2B/ADAM8/CCR7/KL/APOA2/APOL2/DNASE1L3/ASS1/F3/ELANE/IGHG1/NLRP6/PTGES/IL1A/TFR2/HAMP	39
BP	GO:0030593	neutrophil chemotaxis	37/2932	106/18903	6.69072e-07	2.67157e-05	2.19186e-05	S100A9/S100A8/S100A12/BST1/FCER1G/CKLF/C3AR1/DPP4/TNFAIP6/VAV1/RAC2/PPBP/MIR223/CSF3R/IL1B/PPIB/MPP1/CCL24/MDK/CXCR1/CXCL10/CCR7/NOD2/PF4/LGALS3/BSG/CCL8/ITGA9/CCL2/CCL25/CXCL11/PF4V1/CCL7/CCL23/CXCL9/CCL18/CCL20	37
BP	GO:0002703	regulation of leukocyte mediated immunity	67/2932	241/18903	7.05739e-07	2.79733e-05	2.29505e-05	FCGR1A/IL7R/RASGRP1/IL10/CD177/GATA3/LILRB4/CD96/B2M/IL18/ITGAM/JAK3/CEACAM1/MAD2L2/FGR/CD28/CR2/FADD/TYROBP/BST2/FES/NECTIN2/TNFSF13/ARG1/FUT7/STXBP2/ARRB2/CD55/SPI1/VAV1/IL18R1/CD300A/KLRC4/IL4R/BCL6/CR1/RAC2/HLA-A/ARID5A/SUSD4/ICAM1/LILRB1/RABGEF1/LGALS9/HLA-H/IL1B/CR1L/KIT/HMOX1/FCGR2B/TGFB1/CD1C/CLEC4G/CD1E/NOD2/RSAD2/TLR4/IL1R1/KIR2DL4/IL23R/DNASE1L3/SLC22A13/RIGI/HLA-G/GATA1/LAG3/IL21	67
BP	GO:0044409	entry into host	49/2932	158/18903	7.0955e-07	2.79733e-05	2.29505e-05	DYNLT1/MID2/IFITM1/PLSCR1/LGALS1/WWP1/CLEC5A/GAS6/SNX3/DPP4/CDHR3/IFITM3/CR2/CTSL/TRIM25/CTSB/NECTIN2/FCN1/IFITM2/CD55/TRIM21/FURIN/CR1/RNASEK/HYAL2/TRIM22/HAVCR1/ICAM1/ACE2/SELPLG/HSPA1B/CDK1/CLDN9/LGALS9/NCAM1/HSPA1A/LY6E/PTX3/GYPA/CLEC4G/GSN/TRIM6/SIGLEC1/SLC1A5/BSG/CAV1/TRIM10/TMPRSS2/EPHA2	49
BP	GO:0002719	negative regulation of cytokine production involved in immune response	18/2932	35/18903	8.07146e-07	3.16208e-05	2.5943e-05	IL10/LILRB4/CD96/JAK3/BST2/ARG1/TGFB3/BCL6/IRAK3/ANGPT1/LILRB1/RABGEF1/HMOX1/TGFB1/PRG2/APOA2/NOD2/ACP5	18
BP	GO:0046651	lymphocyte proliferation	80/2932	305/18903	8.43214e-07	3.28274e-05	2.69329e-05	LEF1/IL7R/RASGRP1/MYD88/BST1/IL10/CD40LG/LILRB4/NFATC2/ANXA1/IL18/FKBP1B/ATM/IL27/JAK3/BCL2/CD28/CR2/AIF1/FADD/TYROBP/TNFSF13B/PRKCD/CEBPB/ARG1/CD55/CCND3/PYCARD/ZBTB7B/CDKN1A/CD300A/VSIG4/SLC11A1/BCL6/PDCD1LG2/CD274/GPR183/CR1/RAC2/HLA-A/IGFBP2/VSIR/CD151/BMI1/PNP/DLG5/SELENOK/LILRB1/FCRL3/LGALS9/IL1B/FCGR2B/IRF1/JAK2/CLEC4G/LST1/TNFRSF13C/TLR4/PSMB10/MIR21/LGALS3/IDO1/CD22/IL23R/SPTA1/MS4A1/MZB…	80
BP	GO:0002287	alpha-beta T cell activation involved in immune response	28/2932	71/18903	9.22039e-07	3.5453e-05	2.90871e-05	LEF1/GATA3/BATF/ANXA1/IL18/RORA/IL27/JAK3/SEMA4A/JUNB/ZBTB7B/IL18R1/IL4R/BCL6/GPR183/BCL3/RORC/ZC3H12A/LGALS9/RARA/RELB/ENTPD7/EOMES/HLX/MIR21/IL23R/TMEM98/IL21	28
BP	GO:0002293	alpha-beta T cell differentiation involved in immune response	28/2932	71/18903	9.22039e-07	3.5453e-05	2.90871e-05	LEF1/GATA3/BATF/ANXA1/IL18/RORA/IL27/JAK3/SEMA4A/JUNB/ZBTB7B/IL18R1/IL4R/BCL6/GPR183/BCL3/RORC/ZC3H12A/LGALS9/RARA/RELB/ENTPD7/EOMES/HLX/MIR21/IL23R/TMEM98/IL21	28
BP	GO:0071356	cellular response to tumor necrosis factor	65/2932	234/18903	1.06044e-06	4.05246e-05	3.3248e-05	ADAMTS12/AIM2/TRAF5/GATA3/GBA1/CASP1/CASP4/CARD16/TXNDC17/NOL3/GAS6/ILK/RORA/GPER1/MAPK14/NAIP/EXT1/TNFSF13B/CD58/NR1D1/CYBA/CAMP/CEBPA/PYCARD/SPHK1/ZFP36/GBP2/HYAL2/NKX3-1/ZC3H12A/TNFRSF1A/HSPA1B/HSPA1A/ACOD1/NFKBIA/CCL24/MAPK3/JAK2/GBP1/TNFRSF13C/CYP1B1/PID1/H2BC11/PRKN/FAS/CCL8/ASS1/SHARPIN/GBP3/CCL2/CCL25/AKAP12/THBS1/SFRP1/TNFRSF17/CLDN18/ADAMTS7/COL1A1/CCL7/CCL23/SLC2A4/FABP4/HAMP/CCL18/CCL…	65
BP	GO:0032943	mononuclear cell proliferation	81/2932	312/18903	1.12678e-06	4.2797e-05	3.51124e-05	LEF1/IL7R/RASGRP1/MYD88/BST1/IL10/CD40LG/LILRB4/NFATC2/ANXA1/IL18/FKBP1B/ATM/IL27/JAK3/BCL2/CD28/CR2/AIF1/FADD/TYROBP/TNFSF13B/PRKCD/CEBPB/ARG1/CD55/CCND3/PYCARD/ZBTB7B/CDKN1A/CD300A/VSIG4/SLC11A1/BCL6/PDCD1LG2/CD274/GPR183/CR1/RAC2/HLA-A/IGFBP2/VSIR/CD151/BMI1/PNP/DLG5/SELENOK/LILRB1/FCRL3/LGALS9/IL1B/FCGR2B/IRF1/JAK2/CLEC4G/LST1/TNFRSF13C/TLR4/PSMB10/MIR21/LGALS3/IDO1/CD22/IL23R/SPTA1/MS4A1/MZB…	81
BP	GO:0045730	respiratory burst	19/2932	39/18903	1.17096e-06	4.42056e-05	3.62681e-05	CYBC1/NCF4/GRN/CYBA/HCK/CD55/SLC11A1/RAC2/NCF1C/NCF1B/SELENOK/NCF1/MPO/SLAMF8/PRDX2/CD24/JCHAIN/IGHA2/IGHA1	19
BP	GO:0043367	CD4-positive, alpha-beta T cell differentiation	32/2932	88/18903	1.33874e-06	5.02349e-05	4.12148e-05	LEF1/GATA3/BATF/ANXA1/IL18/RORA/IL27/JAK3/CTSL/SEMA4A/FUT7/JUNB/ZBTB7B/IL18R1/IL4R/BCL6/GPR183/BCL3/SOCS1/RORC/TOX/ZC3H12A/LGALS9/RARA/RELB/ENTPD7/HLX/RSAD2/MIR21/IL23R/TMEM98/IL21	32
BP	GO:1903557	positive regulation of tumor necrosis factor superfamily cytokine production	37/2932	109/18903	1.45583e-06	5.43016e-05	4.45512e-05	LILRA5/RASGRP1/MYD88/LY96/FADD/TYROBP/MMP8/CD14/CYBA/IFNGR1/PYCARD/CLU/ARID5A/OAS1/ORM1/TLR2/SELENOK/ORM2/LGALS9/LILRA2/JAK2/ADAM8/DDT/HSPB1/NOD2/TLR4/PF4/OAS3/OAS2/IFIH1/RIGI/AKAP12/THBS1/AZU1/EPHB2/IL1A/IL33	37
BP	GO:0051701	biological process involved in interaction with host	58/2932	203/18903	1.48287e-06	5.49809e-05	4.51086e-05	DYNLT1/MID2/IFITM1/PLSCR1/LGALS1/WWP1/CLEC5A/GAS6/SNX3/DPP4/CHMP5/CDHR3/IFITM3/CR2/CTSL/TRIM25/CTSB/NECTIN2/PGLYRP1/FCN1/IFITM2/CD55/VAPA/TRIM21/CHMP2A/FURIN/CR1/RNASEK/HYAL2/TRIM22/HAVCR1/ICAM1/ACE2/SELPLG/HSPA1B/CDK1/CLDN9/LGALS9/NCAM1/LTF/HSPA1A/LY6E/PTX3/GYPA/CLEC4G/GSN/TRIM6/SIGLEC1/SLC1A5/BSG/CHMP4C/IFIT1/CAV1/TRIM10/INHBB/TMPRSS2/EPHA2/BCL2L1	58
BP	GO:0032479	regulation of type I interferon production	36/2932	105/18903	1.53537e-06	5.59288e-05	4.58863e-05	UFD1/GAPDH/MYD88/HMGB2/IL10/RNF125/NMI/NLRC3/RNF135/FLOT1/CD14/IRF7/PYCARD/TRIM21/CGAS/PTPRS/OAS1/TLR2/LILRB1/HSP90AA1/ISG15/RELB/ACOD1/IRF1/SIRPA/TLR4/MIR21/RIOK3/LILRA4/OAS3/DHX58/OAS2/IFIH1/RIGI/TREX1/TRIM15	36
BP	GO:0032606	type I interferon production	36/2932	105/18903	1.53537e-06	5.59288e-05	4.58863e-05	UFD1/GAPDH/MYD88/HMGB2/IL10/RNF125/NMI/NLRC3/RNF135/FLOT1/CD14/IRF7/PYCARD/TRIM21/CGAS/PTPRS/OAS1/TLR2/LILRB1/HSP90AA1/ISG15/RELB/ACOD1/IRF1/SIRPA/TLR4/MIR21/RIOK3/LILRA4/OAS3/DHX58/OAS2/IFIH1/RIGI/TREX1/TRIM15	36
BP	GO:0032760	positive regulation of tumor necrosis factor production	36/2932	105/18903	1.53537e-06	5.59288e-05	4.58863e-05	LILRA5/RASGRP1/MYD88/LY96/FADD/TYROBP/MMP8/CD14/CYBA/IFNGR1/PYCARD/CLU/ARID5A/OAS1/ORM1/TLR2/SELENOK/ORM2/LGALS9/LILRA2/JAK2/DDT/HSPB1/NOD2/TLR4/PF4/OAS3/OAS2/IFIH1/RIGI/AKAP12/THBS1/AZU1/EPHB2/IL1A/IL33	36
BP	GO:0002286	T cell activation involved in immune response	39/2932	118/18903	1.64074e-06	5.94196e-05	4.87503e-05	LEF1/FCER1G/GATA3/BATF/ANXA1/CLEC4D/IL18/RORA/IL27/JAK3/CEACAM1/SEMA4A/CLEC4E/JUNB/ZBTB7B/IL18R1/SLC11A1/IL4R/BCL6/GPR183/BCL3/RORC/ICAM1/ZC3H12A/LILRB1/LGALS9/RARA/RELB/FCGR2B/ENTPD7/MDK/EOMES/CD1C/HLX/MIR21/LGALS3/IL23R/TMEM98/IL21	39
BP	GO:0042832	defense response to protozoan	15/2932	27/18903	1.88177e-06	6.77547e-05	5.55887e-05	MYD88/IL10/BATF/ARG1/BATF2/SLC11A1/IL4R/BCL3/GBP2/BPGM/GBP6/PF4/DEFA1B/DEFA1/GBP4	15
BP	GO:0036230	granulocyte activation	21/2932	47/18903	1.93533e-06	6.92825e-05	5.68422e-05	ANXA3/MYD88/FCER1G/CD177/ANXA1/IL18/ITGAM/TYROBP/GRN/PRKCD/CAMP/STXBP2/SPI1/CD300A/LILRA2/FCGR2B/PRG3/ENPP3/DNASE1L3/CTSG/SCNN1B	21
BP	GO:1902105	regulation of leukocyte differentiation	81/2932	317/18903	2.21442e-06	7.88208e-05	6.46678e-05	LEF1/IL7R/RASGRP1/TCF7/C1QC/IL10/ZC3H8/TESPA1/CAMK4/GATA3/PRELID1/LILRB4/SMARCD3/BATF/ANXA1/IL18/GAS6/ZBTB46/IL27/JAK3/VNN1/CEACAM1/CD28/TFE3/FADD/TYROBP/FES/CEBPB/PGLYRP1/TNFAIP6/LILRB3/JUNB/IRF7/IL15RA/ZBTB7B/FSTL3/TRIB1/IL4R/BCL6/CR1/HMGB3/SOCS1/VSIR/TOX/PNP/ZC3H12A/CCR1/NFAM1/BAD/LILRB1/FCRL3/LGALS9/MIR223/GPR137/LTF/RARA/FCGR2B/MDK/IRF1/TGFB1/CLEC4G/HLA-DOA/ADAM8/HLX/TLR4/MIR21/MMP14/PF4/INH…	81
BP	GO:0035710	CD4-positive, alpha-beta T cell activation	38/2932	115/18903	2.23257e-06	7.90151e-05	6.48273e-05	LEF1/GATA3/BATF/ANXA1/IL18/RORA/IL27/JAK3/CD28/CTSL/SEMA4A/FUT7/JUNB/CD55/ZBTB7B/IL18R1/IL4R/BCL6/CD274/GPR183/BCL3/SOCS1/VSIR/RORC/TOX/ZC3H12A/TCIRG1/TARM1/LGALS9/RARA/RELB/ENTPD7/HLX/RSAD2/MIR21/IL23R/TMEM98/IL21	38
BP	GO:0002294	CD4-positive, alpha-beta T cell differentiation involved in immune response	27/2932	70/18903	2.38725e-06	8.35405e-05	6.854e-05	LEF1/GATA3/BATF/ANXA1/IL18/RORA/IL27/JAK3/SEMA4A/JUNB/ZBTB7B/IL18R1/IL4R/BCL6/GPR183/BCL3/RORC/ZC3H12A/LGALS9/RARA/RELB/ENTPD7/HLX/MIR21/IL23R/TMEM98/IL21	27
BP	GO:0043627	response to estrogen	27/2932	70/18903	2.38725e-06	8.35405e-05	6.854e-05	GATA3/GBA1/SRA1/TRIM25/TGFB3/ARPC1B/IL4R/WNT7A/ARID5A/IGFBP2/HSP90AA1/GSTM3/WBP2/HMOX1/RARA/ZNF366/APOA2/MMP14/CITED4/MMP2/CAV1/SFRP1/GAL/GATA6/GLI3/CD24/ABCB11	27
BP	GO:0032689	negative regulation of interferon-gamma production	20/2932	44/18903	2.43752e-06	8.48231e-05	6.95923e-05	IL10/GATA3/LILRB4/CD96/GAS6/PGLYRP1/PDCD1LG2/CD274/CR1/VSIR/ZC3H12A/LILRB1/LGALS9/RARA/NOD2/TLR4/INHBA/NLRP6/IL1RL1/IL33	20
BP	GO:0071674	mononuclear cell migration	58/2932	206/18903	2.47716e-06	8.57236e-05	7.03311e-05	S100A12/CCR6/CKLF/GATA3/GBA1/C3AR1/HSD3B7/TRPM2/ANXA1/GCSAM/GAS6/AIF1/EXT1/FADD/ALOX5/FUT7/PYCARD/SPI1/GPR183/ICAM1/TRPV4/CCR1/SELENOK/NLRP12/CXCL16/DUSP1/PDGFD/LGALS9/CD200R1/CCN3/CCL24/MDK/PADI2/MAPK3/CXCR1/CXCL10/ADAM8/CXCL17/SIRPA/CCR7/FPR2/LGALS3/SLAMF8/ECM1/CCL8/CTSG/DEFA1B/CCL2/CCL25/CXCL11/DEFA1/THBS1/CXCL12/CCL7/CCL23/CCL18/APOD/CCL20	58
BP	GO:0044000	movement in host	53/2932	183/18903	2.64727e-06	9.11042e-05	7.47456e-05	DYNLT1/MID2/IFITM1/PLSCR1/LGALS1/WWP1/CLEC5A/GAS6/SNX3/DPP4/CHMP5/CDHR3/IFITM3/CR2/CTSL/TRIM25/CTSB/NECTIN2/FCN1/IFITM2/CD55/VAPA/TRIM21/CHMP2A/FURIN/CR1/RNASEK/HYAL2/TRIM22/HAVCR1/ICAM1/ACE2/SELPLG/HSPA1B/CDK1/CLDN9/LGALS9/NCAM1/HSPA1A/LY6E/PTX3/GYPA/CLEC4G/GSN/TRIM6/SIGLEC1/SLC1A5/BSG/CHMP4C/CAV1/TRIM10/TMPRSS2/EPHA2	53
BP	GO:0006334	nucleosome assembly	39/2932	121/18903	3.29737e-06	0.000112853	9.25896e-05	KAT6B/H2BC5/HMGB2/H3C4/H2BC21/H2BC12/H4C8/H4C4/H2BC18/H1-2/H2BC6/PADI4/H3-3B/H3-3A/NAP1L3/TSPYL5/NAP1L2/H4C11/BAZ1A/H4C12/H4C5/H2BC8/H2BC12L/H3C14/H3C15/H2BC4/H3C10/H3C12/H1-0/H2AX/H2BC11/H1-6/H1-4/H2BC17/H3C13/H4C9/H4C3/H2BC7/H3C6	39
BP	GO:0032612	interleukin-1 production	41/2932	130/18903	3.47103e-06	0.000116871	9.58858e-05	LILRA5/AIM2/MYD88/IL10/NLRC4/LILRB4/CASP1/SERPINB1/CARD16/ANXA1/GAS6/CEACAM1/NAIP/TYROBP/CARD17P/ARRB2/PYCARD/IL1R2/IFI16/SPHK1/ZC3H12A/ORM1/GSDMD/PML/NLRP12/ORM2/LGALS9/LILRA2/JAK2/SIRPA/CCR7/HSPB1/NOD2/TLR4/NLRP7/GBP5/INAVA/IGHD/ACP5/AZU1/IGF1	41
BP	GO:0032652	regulation of interleukin-1 production	41/2932	130/18903	3.47103e-06	0.000116871	9.58858e-05	LILRA5/AIM2/MYD88/IL10/NLRC4/LILRB4/CASP1/SERPINB1/CARD16/ANXA1/GAS6/CEACAM1/NAIP/TYROBP/CARD17P/ARRB2/PYCARD/IL1R2/IFI16/SPHK1/ZC3H12A/ORM1/GSDMD/PML/NLRP12/ORM2/LGALS9/LILRA2/JAK2/SIRPA/CCR7/HSPB1/NOD2/TLR4/NLRP7/GBP5/INAVA/IGHD/ACP5/AZU1/IGF1	41
BP	GO:0001562	response to protozoan	15/2932	28/18903	3.47105e-06	0.000116871	9.58858e-05	MYD88/IL10/BATF/ARG1/BATF2/SLC11A1/IL4R/BCL3/GBP2/BPGM/GBP6/PF4/DEFA1B/DEFA1/GBP4	15
BP	GO:0000302	response to reactive oxygen species	57/2932	204/18903	3.9016e-06	0.000130662	0.0001072	TXN/PLEKHA1/HP/IL10/TRPM2/PTPRK/ANXA1/FKBP1B/GPR37L1/PRDX1/BCL2/FOSL1/MMP9/PRKCD/ARG1/PRDX5/ADAM9/CAMKK2/SPHK1/BAK1/HYAL2/FBLN5/PDCD10/ROMO1/BAD/CDK1/PJVK/NME8/PDGFD/AREG/NCF1/HMOX1/HGF/MAPK3/PINK1/SIRPA/PYCR1/CYP1B1/GCH1/SDC1/GPX1/MPO/MIR21/CYP2E1/MMP2/PLK3/AQP1/TREX1/PRDX2/COL1A1/MET/IL1A/PTPRN/H19/HBB/APOE/APOD	57
BP	GO:0002704	negative regulation of leukocyte mediated immunity	26/2932	68/18903	4.41795e-06	0.00014638	0.000120096	IL7R/LILRB4/CD96/JAK3/CEACAM1/CR2/BST2/ARG1/ARRB2/CD55/SPI1/CD300A/BCL6/CR1/HLA-A/SUSD4/LILRB1/RABGEF1/LGALS9/CR1L/HMOX1/FCGR2B/CLEC4G/NOD2/KIR2DL4/HLA-G	26
BP	GO:0042093	T-helper cell differentiation	26/2932	68/18903	4.41795e-06	0.00014638	0.000120096	LEF1/GATA3/BATF/ANXA1/IL18/RORA/IL27/JAK3/SEMA4A/JUNB/ZBTB7B/IL18R1/IL4R/BCL6/GPR183/BCL3/RORC/ZC3H12A/RARA/RELB/ENTPD7/HLX/MIR21/IL23R/TMEM98/IL21	26
BP	GO:0097191	extrinsic apoptotic signaling pathway	61/2932	224/18903	4.52052e-06	0.000148986	0.000122234	HMGB2/BCL2A1/ITGA6/NOL3/ZMYND11/GPER1/BCL2/ZDHHC3/G0S2/TNFSF10/FADD/SORT1/LTBR/IFI27/GABARAP/PYCARD/SPI1/STK3/ACVR1B/BAK1/RBCK1/HYAL2/ITPRIP/SIAH2/ICAM1/IFI6/DBH/NDUFA13/TNFRSF1A/BAD/PML/HSPA1B/ERBB3/ATF3/IL1B/HSPA1A/HMOX1/IL19/HGF/DEDD2/TNFRSF12A/TGFB1/JAK2/GPX1/PF4/LGALS3/INHBA/FAS/CAV1/THBS1/SFRP1/PRDX2/GATA1/BCL2L14/IL1A/BCL2L1/IGF1/IL33/TIMP3/ITM2C/TERT	61
BP	GO:0032608	interferon-beta production	23/2932	57/18903	5.38719e-06	0.000175196	0.000143738	HMGB2/NMI/NLRC3/RNF135/FLOT1/IRF7/PYCARD/PTPRS/OAS1/TLR2/LILRB1/HSP90AA1/ISG15/RELB/IRF1/SIRPA/TLR4/RIOK3/OAS3/DHX58/OAS2/IFIH1/RIGI	23
BP	GO:0032648	regulation of interferon-beta production	23/2932	57/18903	5.38719e-06	0.000175196	0.000143738	HMGB2/NMI/NLRC3/RNF135/FLOT1/IRF7/PYCARD/PTPRS/OAS1/TLR2/LILRB1/HSP90AA1/ISG15/RELB/IRF1/SIRPA/TLR4/RIOK3/OAS3/DHX58/OAS2/IFIH1/RIGI	23
BP	GO:0045785	positive regulation of cell adhesion	112/2932	484/18903	5.40016e-06	0.000175196	0.000143738	ETS1/EPHA4/LEF1/IL7R/RASGRP1/IL10/TESPA1/CD40LG/GATA3/LILRB4/CCL28/SMARCD3/LGALS1/ANXA1/B2M/IL18/FLOT1/ILK/ST3GAL4/DPP4/ATM/SPOCK2/JAK3/VNN1/CD28/TFE3/FLOT2/AIF1/FADD/ANK3/TNFSF13B/MYO10/ALOX5/FUT7/EMILIN2/CD55/PYCARD/PLAUR/ZBTB7B/VAV1/FSTL3/IL4R/ADAM9/BCL6/CD5/PDCD1LG2/CD274/CR1/HLA-A/SOCS1/FBLN2/IGFBP2/VSIR/BMI1/PNP/RRAS/ANGPT1/SELENOK/BAD/LILRB1/LGALS9/DISC1/IL1B/EPHA1/CASS4/LAMA2/RARA/EPB41L4…	112
BP	GO:2000116	regulation of cysteine-type endopeptidase activity	63/2932	235/18903	5.55158e-06	0.000179175	0.000147003	S100A9/S100A8/AIM2/LAMTOR5/NLRC4/PPARG/CST7/CASP1/CARD16/NOL3/GAS6/GPER1/CTSH/NAIP/CTSD/TNFSF10/CDKN2D/FADD/MMP9/PRDX5/ACVR1C/ARRB2/POR/PYCARD/PLAUR/IFI16/BAK1/NKX3-1/SIAH2/P2RX1/PSMB9/MICAL1/IFI6/NDUFA13/BIRC5/BAD/PML/NLRP12/ST20/LGALS9/LTF/DLC1/HGF/ASPH/CCN2/JAK2/GSN/FIS1/HSPE1/GPX1/ADORA2A/FAS/LAMP3/COL4A3/F3/AQP1/HIP1/NLRP6/THBS1/SOX7/SNCA/ROBO1/DPEP1	63
BP	GO:0016485	protein processing	66/2932	250/18903	5.88002e-06	0.000188587	0.000154724	HP/PTCH1/NLRC4/SPON1/CST7/HPR/CASP1/PGK1/CASP4/CARD16/CTSZ/NOL3/DPP4/CTSH/SRGN/CTSL/FADD/PLGRKT/IMMP2L/DYNC2H1/PSENEN/PYCARD/PLAUR/HPN/C1RL/GGT1/IL1R2/TMEM208/IFI16/ECE1/BAK1/FURIN/PRKACB/VSIR/ADAMTS3/ACE2/CPE/BAD/F12/PCSK9/ASPH/ASPRV1/ADAMTS2/GSN/ADAM8/C1R/CLEC3B/PLAU/MMP14/GAS1/NLRP7/SEC11C/CHAC1/CTSG/F3/NLRP6/THBS1/PRSS37/PCSK6/KEL/TMPRSS2/GLI3/KLK2/PCSK1N/TMEM98/CTSE	66
BP	GO:0032613	interleukin-10 production	25/2932	65/18903	5.93402e-06	0.000188587	0.000154724	LILRA5/CD40LG/LILRB4/JAK3/CD28/TYROBP/MMP8/PYCARD/PDCD1LG2/CD274/BCL3/TRIB2/VSIR/TLR2/LILRB1/ISG15/LGALS9/HGF/FCGR2B/PRG2/NOD2/TLR4/IDO1/IL23R/INAVA	25
BP	GO:0032653	regulation of interleukin-10 production	25/2932	65/18903	5.93402e-06	0.000188587	0.000154724	LILRA5/CD40LG/LILRB4/JAK3/CD28/TYROBP/MMP8/PYCARD/PDCD1LG2/CD274/BCL3/TRIB2/VSIR/TLR2/LILRB1/ISG15/LGALS9/HGF/FCGR2B/PRG2/NOD2/TLR4/IDO1/IL23R/INAVA	25
BP	GO:0051873	killing by host of symbiont cells	15/2932	29/18903	6.15837e-06	0.000194723	0.000159759	GAPDH/MYD88/ARG1/CAMP/ROMO1/APOL1/PF4/CTSG/ELANE/DEFA1B/DEFA1/NLRP6/AZU1/DEFA5/SCNN1B	15
BP	GO:1903039	positive regulation of leukocyte cell-cell adhesion	71/2932	275/18903	6.20932e-06	0.000195343	0.000160267	ETS1/LEF1/IL7R/RASGRP1/TESPA1/CD40LG/GATA3/LILRB4/SMARCD3/LGALS1/ANXA1/B2M/IL18/ST3GAL4/DPP4/JAK3/VNN1/CD28/FLOT2/AIF1/FADD/TNFSF13B/ALOX5/FUT7/CD55/PYCARD/ZBTB7B/VAV1/IL4R/BCL6/CD5/PDCD1LG2/CD274/CR1/HLA-A/SOCS1/IGFBP2/VSIR/BMI1/PNP/SELENOK/BAD/LILRB1/LGALS9/IL1B/RARA/MDK/JAK2/HLA-DOA/ADAM8/SIRPA/CCR7/TNFRSF13C/HLX/NOD2/SELP/MIR21/IL23R/SPTA1/CAV1/ELANE/CCL2/EBI3/HLA-G/GLI3/CD276/CD24/IL1A/IGF2/…	71
BP	GO:0007599	hemostasis	62/2932	231/18903	6.30276e-06	0.000196975	0.000161606	CLIC1/MYL12A/FCER1G/CD40LG/TXK/PLSCR1/C1GALT1C1/CD59/GAS6/ILK/ST3GAL4/MAPK14/CEACAM1/DGKE/NFE2/PRKCD/SERPINA1/EMILIN2/PLA2G4A/FERMT3/SERPINB2/PLAUR/VAV1/TPH1/P2RX1/SERPING1/PLEK/F5/TFPI/F12/FAP/GP1BB/JAK2/TREML1/MERTK/HSPB1/MYL9/SELP/PLAU/TLR4/ADORA2A/PF4/PROS1/CTSG/CAV1/F3/GP9/DGKK/PF4V1/THBS1/MMRN1/PRDX2/MFSD2B/EPHB2/SLC4A1/GATA1/PDPN/ANXA8/KRT1/HBB/DGKI/APOE	62
BP	GO:0002833	positive regulation of response to biotic stimulus	53/2932	188/18903	6.32444e-06	0.000196975	0.000161606	RASGRP1/AIM2/HMGB2/NLRC4/TXK/PLSCR1/LY96/NMI/FADD/TYROBP/SIGLEC16/GRN/NECTIN2/ARG1/CD14/CYBA/IFI35/FCN1/PAK3/EMILIN2/FFAR2/HCK/IRF7/PYCARD/SPI1/VAV1/PARP9/CGAS/IFI16/KLRC4/CD274/CLEC6A/HSP90AA1/ZBP1/FCN2/OASL/LILRA2/ACOD1/TRIM6/ADAM8/FPR2/NOD2/TLR4/RIOK3/KIR2DL4/GBP5/DHX58/SLC22A13/HLA-G/DDX60/LAG3/IL21/TRIM15	53
BP	GO:0062207	regulation of pattern recognition receptor signaling pathway	35/2932	107/18903	7.13296e-06	0.000221051	0.000181359	UFD1/TLR5/RNF125/FLOT1/NR1D1/CD14/CYBA/IFI35/ARRB2/IRF7/CD300A/IRAK3/PTPRS/TLR2/HSPA1B/FCRL3/LTF/HSPA1A/OASL/LILRA2/ACOD1/IRF1/SLC15A3/NR1H3/NOD2/RSAD2/TLR4/RIOK3/LILRA4/CAV1/DHX58/TSPAN6/NLRP6/DDX60/TRIM15	35
BP	GO:0001909	leukocyte mediated cytotoxicity	41/2932	134/18903	8.03443e-06	0.000247755	0.000203268	FCGR1A/IL7R/RASGRP1/MYD88/B2M/IL18/ITGAM/PRDX1/CTSH/CEACAM1/FADD/TYROBP/NECTIN2/ARG1/STXBP2/ARRB2/SPI1/VAV1/TUBB4B/KLRC4/HLA-A/ICAM1/LILRB1/LGALS9/HLA-H/FCGR2B/CD1C/CD1E/KIR2DL4/IL23R/DNASE1L3/CTSG/ELANE/IGHG1/SLC22A13/NLRP6/HLA-G/AZU1/LAG3/SCNN1B/IL21	41
BP	GO:0050766	positive regulation of phagocytosis	27/2932	74/18903	8.16053e-06	0.000250404	0.000205441	FCGR1A/FCER1G/GAS6/LMAN2/CYBA/FCN1/IL15RA/PYCARD/C2/SLC11A1/RAB31/TUB/CFP/FCN2/IL1B/PTX3/FCGR2B/MERTK/SIRPA/APOA2/FPR2/NOD2/SPACA3/C4B/C4A/CCL2/AZU1	27
BP	GO:0019079	viral genome replication	40/2932	130/18903	8.87214e-06	0.000270905	0.000222261	LAMTOR5/APOBEC3B/IFITM1/PLSCR1/SLPI/GAS6/STOM/BCL2/CD28/IFITM3/BST2/APOBEC3A/IFI27/SRPK1/IFITM2/VAPA/IFI16/TNIP1/OAS1/ZC3H12A/PARP10/ISG15/LTF/OASL/PPIB/TOP2A/EIF2AK2/TRIM6/ISG20/RSAD2/PRKN/OAS3/CCL8/IFIT1/MX1/CCL2/OAS2/IFIH1/IFIT5/AICDA	40
BP	GO:0030198	extracellular matrix organization	79/2932	318/18903	9.07525e-06	0.000275755	0.00022624	ADAMTS12/RECK/GPM6B/FLOT1/GAS6/DPP4/SPOCK2/PHLDB2/NTNG2/NR2E1/EXT1/MMP9/MMP8/QSOX1/SH3PXD2B/HPN/COL5A1/COL19A1/COLGALT2/NTN4/ADAMTSL4/FURIN/BCL3/FBLN5/FBLN2/MMP27/ADAMTS3/ADAMTS5/TNFRSF1A/COL17A1/ADAMTS4/FAP/MMP25/LAMA2/ADAMTS10/OLFML2B/PTX3/MMP28/LAMB3/CREB3L1/ADAMTS2/TNR/TGFB1/PRDX4/CCN2/FOXC1/ADAM8/ADAMTS17/ADAMTS1/CYP1B1/LOXL1/EFEMP2/MMP14/COL23A1/MMP2/MMP1/COL13A1/APLP1/COL4A3/CTSG/CAV1/ELAN…	79
BP	GO:0007249	I-kappaB kinase/NF-kappaB signaling	73/2932	288/18903	9.30662e-06	0.000281412	0.000230882	MID2/S100A12/GAPDH/MYD88/LAMTOR5/EDAR/TRAF5/LILRB4/CASP1/CARD16/LGALS1/CLEC4D/NLRC3/RORA/ZMYND11/TNFSF10/TRIM25/FADD/BST2/NR1D1/LTBR/PYCARD/VAPA/SECTM1/SHISA5/TRIM21/TIFA/IRAK1BP1/S100A4/TBKBP1/BCL3/RBCK1/OTUD7A/TNIP1/EDNRB/TRIM22/CLEC6A/ZC3H12A/TLR2/TNFRSF1A/PLEKHG5/ANGPT1/ALPK1/NLRP12/LGALS9/LTF/TIFAB/IL1B/HMOX1/RELB/NFKBIA/PRDX4/PINK1/TRIM6/LITAF/SIRPA/CCR7/HSPB1/NOD2/TLR4/RIOK3/PRKN/ECM1/GPRC…	73
BP	GO:0070665	positive regulation of leukocyte proliferation	48/2932	167/18903	9.61587e-06	0.000289359	0.000237402	MYD88/BST1/CD40LG/NFATC2/ANXA1/IL18/JAK3/BCL2/CD28/AIF1/FADD/TNFSF13B/BST2/CD55/PYCARD/CDKN1A/BCL6/PDCD1LG2/CD274/GPR183/RAC2/HLA-A/IGFBP2/CSF2RA/BMI1/PNP/SELENOK/FCRL3/LGALS9/IL1B/KIT/MAPK3/JAK2/TNFRSF13C/TLR4/MIR21/IL23R/SPTA1/EBI3/EPHB2/CD276/CD24/IL5RA/IL1A/BCL2L1/IGF2/IGF1/IL21	48
BP	GO:0045069	regulation of viral genome replication	30/2932	87/18903	9.76231e-06	0.000292353	0.000239858	APOBEC3B/IFITM1/PLSCR1/SLPI/BCL2/CD28/IFITM3/BST2/APOBEC3A/SRPK1/IFITM2/IFI16/TNIP1/OAS1/PARP10/ISG15/LTF/OASL/TOP2A/EIF2AK2/TRIM6/ISG20/RSAD2/OAS3/IFIT1/MX1/OAS2/IFIH1/IFIT5/AICDA	30
BP	GO:0002686	negative regulation of leukocyte migration	22/2932	55/18903	1.01495e-05	0.000302493	0.000248178	CCL28/GCSAM/DPP4/CYP19A1/TNFAIP6/CD300A/RABGEF1/DUSP1/MIR223/CD200R1/CCN3/HMOX1/MMP28/PADI2/RIN3/DDT/SLAMF8/CCL2/CCL25/CXCL12/IL33/APOD	22
BP	GO:0043062	extracellular structure organization	79/2932	319/18903	1.02588e-05	0.000304295	0.000249656	ADAMTS12/RECK/GPM6B/FLOT1/GAS6/DPP4/SPOCK2/PHLDB2/NTNG2/NR2E1/EXT1/MMP9/MMP8/QSOX1/SH3PXD2B/HPN/COL5A1/COL19A1/COLGALT2/NTN4/ADAMTSL4/FURIN/BCL3/FBLN5/FBLN2/MMP27/ADAMTS3/ADAMTS5/TNFRSF1A/COL17A1/ADAMTS4/FAP/MMP25/LAMA2/ADAMTS10/OLFML2B/PTX3/MMP28/LAMB3/CREB3L1/ADAMTS2/TNR/TGFB1/PRDX4/CCN2/FOXC1/ADAM8/ADAMTS17/ADAMTS1/CYP1B1/LOXL1/EFEMP2/MMP14/COL23A1/MMP2/MMP1/COL13A1/APLP1/COL4A3/CTSG/CAV1/ELAN…	79
BP	GO:0043410	positive regulation of MAPK cascade	113/2932	496/18903	1.04337e-05	0.000308018	0.00025271	EPHA4/LILRA5/S100A12/RASGRP1/MYD88/EDAR/TRAF5/GLIPR2/GADD45B/TNIK/GADD45A/GAS6/OSM/TNFAIP8L3/GPR37L1/GPER1/LAMTOR1/MARCO/MAP2K6/NAIP/CDON/MMP8/LTBR/TGFB3/ARRB2/LAMTOR2/PYCARD/SPI1/STK3/ADAM9/SPHK1/GPR183/WNT7A/GADD45G/CAVIN3/PDCD10/ICAM1/TRPV4/ZC3H12A/CCR1/PLCE1/ANGPT1/ACKR3/GDF15/FCRL3/PDGFD/DOK6/LGALS9/NCF1/MAP2K3/IL1B/KIT/MYDGF/HGF/FCGR2B/ACTA2/IGFBP3/CCL24/TGFA/IQGAP3/TGFB1/EIF2AK2/CCN2/MAPK3…	113
BP	GO:0002825	regulation of T-helper 1 type immune response	15/2932	30/18903	1.05509e-05	0.000308552	0.000253149	ANXA1/IL18/IL27/JAK3/PLA2G4A/IL18R1/SLC11A1/IL4R/ARID5A/IL1B/HLX/IL1R1/IL23R/IL1RL1/IL33	15
BP	GO:0042744	hydrogen peroxide catabolic process	15/2932	30/18903	1.05509e-05	0.000308552	0.000253149	HP/PRDX1/PRDX5/PRDX4/GPX1/MPO/HBM/PRDX2/SNCA/HBD/HBB/LPO/HBQ1/HBG1/HBG2	15
BP	GO:0007596	blood coagulation	60/2932	225/18903	1.09522e-05	0.000318185	0.000261052	CLIC1/MYL12A/FCER1G/CD40LG/TXK/PLSCR1/C1GALT1C1/CD59/GAS6/ILK/ST3GAL4/MAPK14/CEACAM1/DGKE/PRKCD/SERPINA1/EMILIN2/PLA2G4A/FERMT3/SERPINB2/PLAUR/VAV1/P2RX1/SERPING1/PLEK/F5/TFPI/F12/FAP/GP1BB/JAK2/TREML1/MERTK/HSPB1/MYL9/SELP/PLAU/TLR4/ADORA2A/PF4/PROS1/CTSG/CAV1/F3/GP9/DGKK/PF4V1/THBS1/MMRN1/PRDX2/MFSD2B/EPHB2/SLC4A1/GATA1/PDPN/ANXA8/KRT1/HBB/DGKI/APOE	60
BP	GO:0032757	positive regulation of interleukin-8 production	24/2932	63/18903	1.09825e-05	0.000318185	0.000261052	MYD88/LAMTOR5/TLR5/FADD/CD58/CD14/FCN1/FFAR2/PYCARD/HYAL2/TLR2/HSPA1B/LGALS9/IL1B/HSPA1A/LILRA2/APOA2/NOD2/TLR4/PRG3/F3/ELANE/RIGI/DEFA5	24
BP	GO:0009620	response to fungus	25/2932	67/18903	1.11041e-05	0.00032022	0.000262721	S100A9/S100A8/S100A12/GAPDH/MYD88/CLEC4D/ARG1/CLEC4E/SPI1/IL17RA/BAK1/CLEC6A/ZBP1/LTF/PTX3/DEFA3/TLR4/MPO/CTSG/ELANE/DEFA1B/DEFA4/DEFA1/DEFA5/HAMP	25
BP	GO:0045229	external encapsulating structure organization	79/2932	321/18903	1.30691e-05	0.00037515	0.000307788	ADAMTS12/RECK/GPM6B/FLOT1/GAS6/DPP4/SPOCK2/PHLDB2/NTNG2/NR2E1/EXT1/MMP9/MMP8/QSOX1/SH3PXD2B/HPN/COL5A1/COL19A1/COLGALT2/NTN4/ADAMTSL4/FURIN/BCL3/FBLN5/FBLN2/MMP27/ADAMTS3/ADAMTS5/TNFRSF1A/COL17A1/ADAMTS4/FAP/MMP25/LAMA2/ADAMTS10/OLFML2B/PTX3/MMP28/LAMB3/CREB3L1/ADAMTS2/TNR/TGFB1/PRDX4/CCN2/FOXC1/ADAM8/ADAMTS17/ADAMTS1/CYP1B1/LOXL1/EFEMP2/MMP14/COL23A1/MMP2/MMP1/COL13A1/APLP1/COL4A3/CTSG/CAV1/ELAN…	79
BP	GO:0051770	positive regulation of nitric-oxide synthase biosynthetic process	11/2932	18/18903	1.34872e-05	0.000384652	0.000315584	JAK3/MAP2K6/TLR2/MAP2K3/NAMPT/JAK2/NOD2/TLR4/CCL2/AKAP12/IL33	11
BP	GO:0050870	positive regulation of T cell activation	65/2932	251/18903	1.35236e-05	0.000384652	0.000315584	LEF1/IL7R/RASGRP1/TESPA1/CD40LG/GATA3/LILRB4/SMARCD3/LGALS1/ANXA1/B2M/IL18/DPP4/JAK3/VNN1/CD28/FLOT2/AIF1/FADD/TNFSF13B/CD55/PYCARD/ZBTB7B/VAV1/IL4R/BCL6/CD5/PDCD1LG2/CD274/CR1/HLA-A/SOCS1/IGFBP2/VSIR/BMI1/PNP/SELENOK/BAD/LILRB1/LGALS9/IL1B/RARA/MDK/JAK2/HLA-DOA/ADAM8/SIRPA/CCR7/TNFRSF13C/HLX/NOD2/MIR21/IL23R/SPTA1/CAV1/CCL2/EBI3/HLA-G/GLI3/CD276/CD24/IL1A/IGF2/IGF1/IL21	65
BP	GO:2001236	regulation of extrinsic apoptotic signaling pathway	45/2932	155/18903	1.35957e-05	0.000384943	0.000315823	HMGB2/ITGA6/NOL3/ZMYND11/GPER1/BCL2/G0S2/TNFSF10/FADD/LTBR/PYCARD/STK3/RBCK1/HYAL2/ITPRIP/SIAH2/ICAM1/IFI6/DBH/PML/HSPA1B/ATF3/IL1B/HSPA1A/HMOX1/IL19/HGF/DEDD2/TNFRSF12A/GPX1/PF4/LGALS3/INHBA/CAV1/THBS1/SFRP1/PRDX2/GATA1/BCL2L14/IL1A/BCL2L1/IGF1/TIMP3/ITM2C/TERT	45
BP	GO:0050868	negative regulation of T cell activation	39/2932	128/18903	1.47345e-05	0.000414715	0.000340249	IL10/ZC3H8/DUSP3/LILRB4/ANXA1/JAK3/CEACAM1/CEBPB/ARG1/ZBTB7B/CD300A/VSIG4/IL4R/TNFAIP8L2/BCL6/PDCD1LG2/CD274/CR1/SOCS1/VSIR/ZC3H12A/DLG5/LILRB1/TARM1/LGALS9/FCGR2B/MDK/IRF1/CLEC4G/HLX/MIR21/ADORA2A/LGALS3/IDO1/CTSG/HLA-G/PRDX2/GLI3/LAG3	39
BP	GO:0002753	cytoplasmic pattern recognition receptor signaling pathway	23/2932	60/18903	1.47803e-05	0.000414715	0.000340249	UFD1/RNF125/RNF135/MAP2K6/IRF7/TIFA/ALPK1/HSPA1B/HSPA1A/OASL/NFKBIA/SLC15A3/NOD2/TLR4/RIOK3/OAS3/INAVA/DHX58/TSPAN6/IFIH1/RIGI/DDX60/TRIM15	23
BP	GO:0045786	negative regulation of cell cycle	95/2932	405/18903	1.53655e-05	0.000429201	0.000352134	IL10/GATA3/FBXO6/PTPRK/MAD2L1BP/ATM/NUPR1/GPER1/MAPK14/BCL2/MAD2L2/CDKN2C/APBB1/MIIP/CDKN2D/CACNB4/TMEM67/CEBPA/MAP3K20/CDKN1A/AURKAIP1/BCL6/CHMP2A/E2F1/CDK5/NKX3-1/NPR2/CDC6/MUC1/BIRC5/LILRB1/CDC45/PML/DUSP1/SPC25/CDK1/AURKB/GMNN/USP44/CDC20/CLSPN/GTSE1/TTK/PTTG1/ATF5/HPGD/APBB2/PBK/TGFB1/FOXC1/MIR451A/BUB1/PLK1/SPC24/DTL/ESPL1/CDK5RAP2/DACT1/E2F8/OVOL1/MIR21/H2AX/GAS1/NEK2/INHBA/ZWINT/BUB1B/CDT…	95
BP	GO:0010948	negative regulation of cell cycle process	78/2932	318/18903	1.67822e-05	0.000466681	0.000382884	FBXO6/MAD2L1BP/ATM/GPER1/MAPK14/BCL2/MAD2L2/APBB1/MIIP/CDKN2D/CACNB4/TMEM67/MAP3K20/CDKN1A/AURKAIP1/BCL6/CHMP2A/E2F1/NKX3-1/CDC6/MUC1/BIRC5/CDC45/PML/DUSP1/SPC25/CDK1/AURKB/USP44/CDC20/CLSPN/GTSE1/TTK/PTTG1/ATF5/APBB2/PBK/MIR451A/BUB1/PLK1/SPC24/DTL/ESPL1/CDK5RAP2/DACT1/E2F8/OVOL1/H2AX/NEK2/INHBA/ZWINT/BUB1B/CDT1/NUF2/CCNB1/CHMP4C/TICRR/FBXO43/PLK3/TRIP13/NBN/CCL2/RAD51/CHEK1/CDCA8/HASPIN/ORC1/ND…	78
BP	GO:1903038	negative regulation of leukocyte cell-cell adhesion	43/2932	147/18903	1.70636e-05	0.000472395	0.000387572	IL10/ZC3H8/DUSP3/LILRB4/CCL28/ANXA1/JAK3/CEACAM1/CEBPB/ARG1/ZBTB7B/CD300A/VSIG4/IL4R/TNFAIP8L2/BCL6/PDCD1LG2/CD274/CR1/SOCS1/VSIR/ZC3H12A/DLG5/LILRB1/TARM1/LGALS9/FCGR2B/MDK/IRF1/CLEC4G/HLX/MIR21/ADORA2A/LGALS3/IDO1/ASS1/CTSG/CCL25/CXCL12/HLA-G/PRDX2/GLI3/LAG3	43
BP	GO:0032611	interleukin-1 beta production	35/2932	111/18903	1.75746e-05	0.00048014	0.000393927	LILRA5/AIM2/MYD88/NLRC4/LILRB4/CASP1/SERPINB1/CARD16/NAIP/TYROBP/CARD17P/ARRB2/PYCARD/IFI16/SPHK1/ZC3H12A/ORM1/GSDMD/PML/NLRP12/ORM2/LGALS9/LILRA2/JAK2/SIRPA/CCR7/HSPB1/NOD2/TLR4/NLRP7/GBP5/INAVA/ACP5/AZU1/IGF1	35
BP	GO:0032651	regulation of interleukin-1 beta production	35/2932	111/18903	1.75746e-05	0.00048014	0.000393927	LILRA5/AIM2/MYD88/NLRC4/LILRB4/CASP1/SERPINB1/CARD16/NAIP/TYROBP/CARD17P/ARRB2/PYCARD/IFI16/SPHK1/ZC3H12A/ORM1/GSDMD/PML/NLRP12/ORM2/LGALS9/LILRA2/JAK2/SIRPA/CCR7/HSPB1/NOD2/TLR4/NLRP7/GBP5/INAVA/ACP5/AZU1/IGF1	35
BP	GO:1905818	regulation of chromosome separation	35/2932	111/18903	1.75746e-05	0.00048014	0.000393927	PLSCR1/SMARCD3/MAD2L1BP/ATM/MAD2L2/UBE2C/CDC6/DLGAP5/NCAPH2/BIRC5/DUSP1/SPC25/AURKB/USP44/CDC20/TTK/PTTG1/BUB1/PLK1/SPC24/ESPL1/CDK5RAP2/NCAPG/ZWINT/BUB1B/CDT1/NUF2/CCNB1/TRIP13/CENPE/CDCA8/HASPIN/NDC80/NCAPH/CENPF	35
BP	GO:1990868	response to chemokine	32/2932	98/18903	1.80289e-05	0.00048827	0.000400597	CCR6/CXCR5/CCR4/CCRL2/ZC3H12A/CCR1/PPBP/DUSP1/ACKR3/CCL24/PADI2/CXCR1/CXCL10/FOXC1/CCR7/PF4/CCL8/CCR8/XCR1/GPR17/CCL2/CCL25/CXCL11/PF4V1/ACKR1/CXCL12/ROBO1/CCL7/CCL23/CXCL9/CCL18/CCL20	32
BP	GO:1990869	cellular response to chemokine	32/2932	98/18903	1.80289e-05	0.00048827	0.000400597	CCR6/CXCR5/CCR4/CCRL2/ZC3H12A/CCR1/PPBP/DUSP1/ACKR3/CCL24/PADI2/CXCR1/CXCL10/FOXC1/CCR7/PF4/CCL8/CCR8/XCR1/GPR17/CCL2/CCL25/CXCL11/PF4V1/ACKR1/CXCL12/ROBO1/CCL7/CCL23/CXCL9/CCL18/CCL20	32
BP	GO:0150076	neuroinflammatory response	26/2932	73/18903	1.95923e-05	0.000528314	0.00043345	CST7/IL18/ITGAM/ATM/IFNGR2/NUPR1/C1QA/AIF1/TYROBP/GRN/MMP9/NR1D1/MMP8/IFNGR1/CLU/SPHK1/TLR2/CD200R1/IL1B/BPGM/JAK2/ADORA2A/AZU1/SNCA/IGF1/IL33	26
BP	GO:2001198	regulation of dendritic cell differentiation	9/2932	13/18903	2.02168e-05	0.000542805	0.000445339	ZBTB46/CEBPB/LILRB1/LGALS9/MIR223/FCGR2B/HLA-G/TMEM176A/TMEM176B	9
BP	GO:0031100	animal organ regeneration	24/2932	65/18903	2.03148e-05	0.000543095	0.000445577	ANXA3/IL10/PTCH1/ADM/GAS6/CEBPB/BAK1/TGFBR3/CDK1/HMOX1/SLC7A5/HGF/APOA2/AURKA/PGF/NNMT/CCNA2/FLT3/TYMS/CXCL12/GLI3/GATA1/PTPRU/HAMP	24
BP	GO:0043281	regulation of cysteine-type endopeptidase activity involved in apoptotic process	55/2932	205/18903	2.07082e-05	0.000551245	0.000452264	S100A9/S100A8/LAMTOR5/NLRC4/PPARG/CASP1/CARD16/NOL3/GAS6/GPER1/CTSH/NAIP/CTSD/TNFSF10/CDKN2D/MMP9/PRDX5/ACVR1C/ARRB2/POR/PYCARD/PLAUR/BAK1/NKX3-1/SIAH2/P2RX1/MICAL1/IFI6/NDUFA13/BIRC5/BAD/PML/NLRP12/ST20/LGALS9/DLC1/HGF/CCN2/JAK2/GSN/FIS1/HSPE1/GPX1/ADORA2A/FAS/LAMP3/COL4A3/F3/AQP1/HIP1/THBS1/SOX7/SNCA/ROBO1/DPEP1	55
BP	GO:0070098	chemokine-mediated signaling pathway	30/2932	90/18903	2.07981e-05	0.000551283	0.000452295	CCR6/CXCR5/CCR4/CCRL2/CCR1/PPBP/ACKR3/CCL24/PADI2/CXCR1/CXCL10/FOXC1/CCR7/PF4/CCL8/CCR8/XCR1/GPR17/CCL2/CCL25/CXCL11/PF4V1/ACKR1/CXCL12/ROBO1/CCL7/CCL23/CXCL9/CCL18/CCL20	30
BP	GO:0051101	regulation of DNA binding	37/2932	121/18903	2.20874e-05	0.000582977	0.000478298	TXN/LEF1/GTF2B/HMGB2/LAMTOR5/PPARG/GATA3/TAF10/MAD2L2/MMP9/MMP8/HABP4/PLAUR/IFI16/E2F1/NIBAN2/BCL3/NME1/HJURP/HMOX1/NFKBIA/TGFB1/JAK2/TRIM6/FOXC1/H1-0/NEK2/PRKN/CDT1/ID1/ZNF462/ZBTB7C/EGF/GATA1/LIF/IGF1/WFIKKN1	37
BP	GO:0050817	coagulation	60/2932	230/18903	2.25023e-05	0.000591421	0.000485226	CLIC1/MYL12A/FCER1G/CD40LG/TXK/PLSCR1/C1GALT1C1/CD59/GAS6/ILK/ST3GAL4/MAPK14/CEACAM1/DGKE/PRKCD/SERPINA1/EMILIN2/PLA2G4A/FERMT3/SERPINB2/PLAUR/VAV1/P2RX1/SERPING1/PLEK/F5/TFPI/F12/FAP/GP1BB/JAK2/TREML1/MERTK/HSPB1/MYL9/SELP/PLAU/TLR4/ADORA2A/PF4/PROS1/CTSG/CAV1/F3/GP9/DGKK/PF4V1/THBS1/MMRN1/PRDX2/MFSD2B/EPHB2/SLC4A1/GATA1/PDPN/ANXA8/KRT1/HBB/DGKI/APOE	60
BP	GO:0046209	nitric oxide metabolic process	28/2932	82/18903	2.34842e-05	0.00061448	0.000504145	GLA/IL10/DDAH2/RORA/AIF1/TSPO/MMP8/POR/CLU/MTARC1/ZC3H12A/TLR2/HSP90AA1/CYB5R3/IL1B/PTX3/JAK2/SPR/SIRPA/CYP1B1/GCH1/TLR4/ASS1/CAV1/ACP5/CPS1/NOS1AP/HBB	28
BP	GO:0046596	regulation of viral entry into host cell	19/2932	46/18903	2.35769e-05	0.00061448	0.000504145	MID2/IFITM1/LGALS1/SNX3/IFITM3/TRIM25/NECTIN2/FCN1/IFITM2/TRIM21/FURIN/TRIM22/LGALS9/LY6E/PTX3/GSN/TRIM6/TRIM10/TMPRSS2	19
BP	GO:0032693	negative regulation of interleukin-10 production	13/2932	25/18903	2.40686e-05	0.000624679	0.000512513	LILRB4/JAK3/TYROBP/MMP8/PDCD1LG2/CD274/TRIB2/VSIR/LILRB1/FCGR2B/PRG2/IDO1/IL23R	13
BP	GO:0002269	leukocyte activation involved in inflammatory response	20/2932	50/18903	2.54463e-05	0.000657698	0.000539602	MYD88/CST7/ITGAM/ATM/IFNGR2/C1QA/AIF1/TYROBP/GRN/NR1D1/MMP8/IFNGR1/CLU/SPHK1/TLR2/JAK2/AZU1/SNCA/IL33/SCNN1B	20
BP	GO:0045620	negative regulation of lymphocyte differentiation	22/2932	58/18903	2.73582e-05	0.000694262	0.000569601	ZC3H8/LILRB4/ANXA1/JAK3/PGLYRP1/ZBTB7B/IL4R/BCL6/CR1/HMGB3/SOCS1/ZC3H12A/MDK/IRF1/CLEC4G/HLX/MIR21/INHBA/SFRP1/PRDX2/GLI3/LAG3	22
BP	GO:0002820	negative regulation of adaptive immune response	23/2932	62/18903	2.75233e-05	0.000694262	0.000569601	IL7R/LILRB4/JAK3/CEACAM1/SAMSN1/CR2/ARG1/CD55/ZBTB7B/IL4R/BCL6/CR1/SUSD4/ZC3H12A/LILRB1/CR1L/FCGR2B/CLEC4G/NOD2/HLA-G/IL1RL1/IL33/ALOX15	23
BP	GO:0043030	regulation of macrophage activation	23/2932	62/18903	2.75233e-05	0.000694262	0.000569601	IL10/CST7/RORA/ATM/GRN/NR1D1/MMP8/PLA2G4A/CEBPA/VSIG4/IL4R/SPHK1/BPI/ZC3H12A/FCGR2B/NR1H3/TLR4/SPACA3/THBS1/SNCA/IL1RL1/IL33/HAMP	23
BP	GO:0002283	neutrophil activation involved in immune response	11/2932	19/18903	2.75297e-05	0.000694262	0.000569601	ANXA3/MYD88/FCER1G/CD177/ITGAM/TYROBP/STXBP2/SPI1/LILRA2/DNASE1L3/SCNN1B	11
BP	GO:0002523	leukocyte migration involved in inflammatory response	11/2932	19/18903	2.75297e-05	0.000694262	0.000569601	S100A9/S100A8/CCR6/ALOX5/FUT7/FFAR2/TRIM55/MDK/ADAM8/SLAMF8/ELANE	11
BP	GO:0032695	negative regulation of interleukin-12 production	11/2932	19/18903	2.75297e-05	0.000694262	0.000569601	LILRA5/IL10/JAK3/ARRB2/IRAK3/LILRB1/CCR7/NOD2/MIR21/ACP5/THBS1	11
BP	GO:0002285	lymphocyte activation involved in immune response	55/2932	207/18903	2.78755e-05	0.000700147	0.000574429	LEF1/CCR6/IL10/FCER1G/CD40LG/GATA3/BATF/LGALS1/ANXA1/CLEC4D/IL18/DOCK10/RORA/IL27/JAK3/CEACAM1/MAD2L2/CD28/TNFSF13/PGLYRP1/SEMA4A/CLEC4E/JUNB/ZBTB7B/SPI1/IL18R1/SLC11A1/IL4R/BCL6/GPR183/CR1/BCL3/RORC/ICAM1/ZC3H12A/LILRB1/LGALS9/RARA/RELB/FCGR2B/ENTPD7/MDK/TGFB1/EOMES/CD1C/HLX/TLR4/MIR21/LGALS3/IL23R/EXO1/NBN/AICDA/TMEM98/IL21	55
BP	GO:0035456	response to interferon-beta	15/2932	32/18903	2.82487e-05	0.00070667	0.000579781	AIM2/IFITM1/PLSCR1/IFITM3/BST2/IFITM2/IFI16/OAS1/NDUFA13/ACOD1/IRF1/TRIM6/XAF1/CDC34/TREX1	15
BP	GO:0042098	T cell proliferation	56/2932	212/18903	2.83642e-05	0.000706722	0.000579824	RASGRP1/IL10/CD40LG/LILRB4/ANXA1/IL18/FKBP1B/IL27/JAK3/CD28/AIF1/FADD/TNFSF13B/CEBPB/ARG1/CD55/CCND3/PYCARD/ZBTB7B/VSIG4/SLC11A1/BCL6/PDCD1LG2/CD274/CR1/RAC2/HLA-A/IGFBP2/VSIR/CD151/BMI1/PNP/DLG5/SELENOK/LILRB1/LGALS9/IL1B/IRF1/JAK2/CLEC4G/TNFRSF13C/PSMB10/MIR21/LGALS3/IDO1/IL23R/SPTA1/EBI3/HLA-G/PRDX2/CD276/CD24/IL1A/IGF2/IGF1/IL21	56
BP	GO:2001057	reactive nitrogen species metabolic process	28/2932	83/18903	3.02431e-05	0.000750534	0.000615769	GLA/IL10/DDAH2/RORA/AIF1/TSPO/MMP8/POR/CLU/MTARC1/ZC3H12A/TLR2/HSP90AA1/CYB5R3/IL1B/PTX3/JAK2/SPR/SIRPA/CYP1B1/GCH1/TLR4/ASS1/CAV1/ACP5/CPS1/NOS1AP/HBB	28
BP	GO:0007093	mitotic cell cycle checkpoint signaling	41/2932	141/18903	3.08866e-05	0.000763338	0.000626273	MAD2L1BP/ATM/MAD2L2/MAP3K20/CDKN1A/CDC6/MUC1/BIRC5/PML/DUSP1/SPC25/CDK1/AURKB/USP44/CDC20/CLSPN/GTSE1/TTK/PBK/BUB1/PLK1/SPC24/DTL/CDK5RAP2/ZWINT/BUB1B/CDT1/NUF2/CCNB1/CHMP4C/TICRR/PLK3/TRIP13/NBN/CHEK1/CDCA8/HASPIN/ORC1/NDC80/TREX1/CENPF	41
BP	GO:0071459	protein localization to chromosome, centromeric region	18/2932	43/18903	3.10041e-05	0.000763338	0.000626273	H4C8/H4C4/H2AC8/H4C11/H4C12/H4C5/CDK1/AURKB/TTK/CENPA/H2BC11/BUB1B/CDT1/H4C9/H4C3/HASPIN/NDC80/KNL1	18
BP	GO:0051983	regulation of chromosome segregation	39/2932	132/18903	3.21464e-05	0.000788346	0.000646791	PLSCR1/SMARCD3/MAD2L1BP/ATM/MAD2L2/UBE2C/CDC6/DLGAP5/NCAPH2/BIRC5/DUSP1/SPC25/AURKB/USP44/CDC20/TTK/PTTG1/RMI2/CDCA2/BUB1/PLK1/SPC24/ESPL1/CDK5RAP2/MKI67/NCAPG/ZWINT/BUB1B/CDT1/NUF2/CCNB1/KIF2C/TRIP13/CENPE/CDCA8/HASPIN/NDC80/NCAPH/CENPF	39
BP	GO:0060759	regulation of response to cytokine stimulus	49/2932	179/18903	3.24522e-05	0.000792725	0.000650384	PPARG/TXK/CASP1/CASP4/CARD16/NOL3/GAS6/NAIP/AGPAT2/FADD/ARG1/IRF7/PYCARD/IL1RN/PARP9/IL1R2/IRAK3/SPHK1/SOCS1/OAS1/TLR2/TNFRSF1A/ANGPT1/RABGEF1/ZBP1/HSPA1B/ISG15/LRRC70/HSPA1A/PADI2/TRIM6/NR1H3/TLR4/USP18/MIR21/IL1R1/H2BC11/PRKN/ECM1/OAS3/CAV1/SHARPIN/IRAK2/IFIH1/RIGI/NLRP6/TREX1/ROBO1/CD24	49
BP	GO:0030071	regulation of mitotic metaphase/anaphase transition	30/2932	92/18903	3.35049e-05	0.000815242	0.000668858	SMARCD3/MAD2L1BP/ATM/MAD2L2/UBE2C/CDC6/DLGAP5/BIRC5/DUSP1/SPC25/AURKB/USP44/CDC20/TTK/BUB1/PLK1/SPC24/ESPL1/CDK5RAP2/ZWINT/BUB1B/CDT1/NUF2/CCNB1/TRIP13/CENPE/CDCA8/HASPIN/NDC80/CENPF	30
BP	GO:0019932	second-messenger-mediated signaling	76/2932	314/18903	3.47723e-05	0.000842789	0.000691459	RCAN3/GSTO1/DYRK2/CCR6/BST1/ADM/DDAH2/NFATC2/CXCR5/TRPM2/CCR4/FKBP1B/PLCG1/CCRL2/LAT2/CAP1/OPRL1/INSL3/FPR1/CGAS/TMEM38A/HOMER3/MCTP1/NCALD/CAMKK2/SPHK1/NPR2/MCTP2/EDNRB/PLEK/CCR1/PLCE1/PTGFR/SELENOK/ACKR3/ERBB3/MCOLN1/FHL2/CBS/CLIC2/ADGRB2/GBP1/LOC102724560/CXCR1/CCR7/AKAP5/SLC8A2/FIS1/FPR2/DEFB1/SELP/PDE7B/SGCD/ADGRG6/IRAG1/CD22/PDE9A/SAMD14/AQP1/CCR8/XCR1/CDC34/RAPGEF3/BHLHA15/NDNF/POMC/THBS1/…	76
BP	GO:0051306	mitotic sister chromatid separation	32/2932	101/18903	3.55681e-05	0.000858736	0.000704542	SMARCD3/MAD2L1BP/ATM/MAD2L2/UBE2C/CDC6/DLGAP5/NCAPH2/BIRC5/DUSP1/SPC25/AURKB/USP44/CDC20/TTK/PTTG1/BUB1/PLK1/SPC24/ESPL1/CDK5RAP2/ZWINT/BUB1B/CDT1/NUF2/CCNB1/TRIP13/CENPE/CDCA8/HASPIN/NDC80/CENPF	32
BP	GO:0043277	apoptotic cell clearance	20/2932	51/18903	3.5796e-05	0.000860901	0.000706318	ANXA1/GAS6/MARCO/TYROBP/FCN1/JMJD6/RHOG/C2/RAC2/FCN2/RARA/MERTK/NR1H3/TGM2/C4B/C4A/CCL2/THBS1/TREX1/ALOX15	20
BP	GO:0031663	lipopolysaccharide-mediated signaling pathway	23/2932	63/18903	3.70342e-05	0.000887255	0.00072794	MYD88/LY96/CARD16/IL18/MAPK14/CD14/HCK/CD55/SPI1/TRIB1/BPI/TLR2/LTF/IL1B/LILRA2/ACOD1/NFKBIA/TGFB1/MAPK3/TLR4/IRAK2/CCL2/PRDX2	23
BP	GO:0043903	regulation of biological process involved in symbiotic interaction	22/2932	59/18903	3.72802e-05	0.000889726	0.000729968	MID2/IFITM1/LGALS1/SNX3/IFITM3/TRIM25/NECTIN2/ARG1/FCN1/IFITM2/TRIM21/FURIN/TRIM22/LGALS9/LTF/LY6E/PTX3/GSN/TRIM6/CAV1/TRIM10/TMPRSS2	22
BP	GO:2001251	negative regulation of chromosome organization	31/2932	97/18903	3.88083e-05	0.00092266	0.000756988	MAD2L1BP/ATM/MAD2L2/H3-3B/H3-3A/BIRC5/DUSP1/SPC25/AURKB/USP44/CDC20/TTK/PTTG1/TOP2A/BUB1/PLK1/SPC24/ESPL1/CDK5RAP2/ZWINT/BUB1B/CDT1/NUF2/CCNB1/TRIP13/NBN/CDCA8/HASPIN/NDC80/CENPF/PIF1	31
BP	GO:0006119	oxidative phosphorylation	42/2932	147/18903	3.92802e-05	0.000930328	0.000763279	NDUFB3/NDUFAF1/COX6A1/COX7A2/COX5B/NDUFA1/ATP5MF/ATP5PF/NDUFA2/CHCHD2/ATP5F1C/NDUFB6/NUPR1/NDUFB1/ATP5MG/NDUFC2-KCTD14/COX6B1/UQCR11/UQCR10/NDUFA4/COX7B/ATP5PO/ATP5ME/UQCRQ/NDUFS5/UQCRH/COX8A/COX6B2/ABCD1/NDUFA13/UQCRHL/CDK1/NDUFS4/NDUFA7/AK4/PINK1/ATP8/UQCRB/NDUFB7/CCNB1/COX6C/SNCA	42
BP	GO:0051604	protein maturation	80/2932	336/18903	4.05414e-05	0.00095362	0.000782389	HP/PTCH1/NLRC4/SPON1/CST7/HPR/CASP1/PGK1/CASP4/CARD16/CTSZ/NOL3/FKBP1B/DPP4/CTSH/SRGN/CTSL/NAA38/FADD/PLGRKT/TASP1/IMMP2L/DYNC2H1/PSENEN/PYCARD/PLAUR/HPN/C1RL/GGT1/DNAJB11/IL1R2/TMEM208/IFI16/ECE1/BAK1/FURIN/PRKACB/GALNT2/VSIR/ADAMTS3/ACE2/CPE/BAD/F12/CIAO2B/AANAT/PCSK9/GP1BB/ASPH/ASPRV1/ADAMTS2/PRDX4/BOLA2B/GSN/ADAM8/C1R/CLEC3B/PLAU/MMP14/GAS1/NLRP7/SEC11C/CHAC1/GLRX5/CTSG/F3/GP9/NLRP6/THBS1/PRS…	80
BP	GO:0048246	macrophage chemotaxis	17/2932	40/18903	4.05698e-05	0.00095362	0.000782389	CKLF/C3AR1/CYP19A1/MTUS1/EDNRB/TRPV4/MMP28/MDK/MAPK3/CXCL17/DDT/LGALS3/SLAMF8/MMP2/CCL2/THBS1/AZU1	17
BP	GO:0032872	regulation of stress-activated MAPK cascade	52/2932	195/18903	4.09378e-05	0.000958651	0.000786517	RASGRP1/MYD88/FOXO1/EDAR/TRAF5/DUSP3/GADD45B/TNIK/GADD45A/FKTN/ZMYND11/PRDX1/NAIP/DNAJA1/MMP8/LTBR/PYCARD/SPI1/STK3/SPHK1/MDFIC/WNT7A/GADD45G/PDCD10/TRPV4/ZC3H12A/DUSP1/NCF1/IL1B/HGF/FCGR2B/PBK/EIF2AK2/CCN2/MAPK3/PINK1/FLT4/MAP3K11/SIRPA/CCR7/NOD2/DACT1/TLR4/PRKN/FAS/INAVA/KLHL31/SFRP1/IL26/PER1/SEMA3A/IL1A	52
BP	GO:1903901	negative regulation of viral life cycle	13/2932	26/18903	4.13054e-05	0.000963637	0.000790607	MID2/IFITM1/SNX3/IFITM3/TRIM25/BST2/FCN1/IFITM2/LY6E/PTX3/GSN/TRIM10/TRIM15	13
BP	GO:0031341	regulation of cell killing	32/2932	102/18903	4.42042e-05	0.00102742	0.000842935	IL7R/RASGRP1/CD59/B2M/ITGAM/CEACAM1/FADD/TYROBP/NECTIN2/ARG1/ARRB2/CD55/SPI1/VAV1/KLRC4/HLA-A/ICAM1/LILRB1/LGALS9/HLA-H/CR1L/FCGR2B/CD1C/CD1E/KIR2DL4/IL23R/DNASE1L3/SLC22A13/HLA-G/BCL2L1/LAG3/IL21	32
BP	GO:1901222	regulation of NIK/NF-kappaB signaling	34/2932	111/18903	4.49162e-05	0.00104008	0.000853328	NR3C2/EDAR/NMI/NLRC3/IL18/NOL3/ILK/PRDX1/RTKN2/MMP8/ADGRG3/CD14/IFI35/SPI1/IL18R1/TRIP6/SPHK1/BCL3/RBCK1/ZC3H12A/TLR2/NLRP12/LGALS9/MIR223/CCN3/IL1B/NFKBIA/EIF2AK2/LITAF/NOD2/TLR4/MIR21/TSPAN6/ADIPOR1	34
BP	GO:2001233	regulation of apoptotic signaling pathway	87/2932	374/18903	4.74865e-05	0.00109553	0.000898818	S100A9/NOG/S100A8/HMGB2/PRELID1/ITGA6/NOL3/ZMYND11/NUPR1/GPER1/STYXL1/RTKN2/BCL2/VNN1/CTSH/GRINA/G0S2/TNFSF10/CDKN2D/FADD/DNAJA1/MMP9/PRKCD/LTBR/ARRB2/PYCARD/PLAUR/CLU/SEPTIN4/STK3/DDIAS/BAK1/RBCK1/HYAL2/NKX3-1/ITPRIP/MUC1/SIAH2/ICAM1/BMI1/IFI6/DBH/NDUFA13/BAD/PML/HSPA1B/ACKR3/ASAH2/ATF3/IL1B/HSPA1A/HMOX1/IL19/HGF/DEDD2/CREB3L1/TNFRSF12A/JAK2/PINK1/HSPB1/FIS1/GPX1/MIR21/ADORA2A/PF4/LGALS3/INHBA/P…	87
BP	GO:0002689	negative regulation of leukocyte chemotaxis	12/2932	23/18903	4.77409e-05	0.00109734	0.0009003	DPP4/CYP19A1/TNFAIP6/DUSP1/MIR223/CCN3/MMP28/PADI2/RIN3/DDT/SLAMF8/CCL2	12
BP	GO:0010965	regulation of mitotic sister chromatid separation	31/2932	98/18903	4.84227e-05	0.00110891	0.000909799	SMARCD3/MAD2L1BP/ATM/MAD2L2/UBE2C/CDC6/DLGAP5/BIRC5/DUSP1/SPC25/AURKB/USP44/CDC20/TTK/PTTG1/BUB1/PLK1/SPC24/ESPL1/CDK5RAP2/ZWINT/BUB1B/CDT1/NUF2/CCNB1/TRIP13/CENPE/CDCA8/HASPIN/NDC80/CENPF	31
BP	GO:0001836	release of cytochrome c from mitochondria	21/2932	56/18903	5.04798e-05	0.00114759	0.000941528	PRELID1/NOL3/GPER1/BCL2/TNFSF10/MMP9/ARRB2/PYCARD/PLAUR/CLU/BIK/BAK1/IFI6/BAD/HGF/PINK1/FIS1/GPX1/PRKN/BCL2L1/IGF1	21
BP	GO:0050832	defense response to fungus	21/2932	56/18903	5.04798e-05	0.00114759	0.000941528	S100A9/S100A8/S100A12/GAPDH/CLEC4D/ARG1/CLEC4E/SPI1/IL17RA/CLEC6A/ZBP1/LTF/DEFA3/MPO/CTSG/ELANE/DEFA1B/DEFA4/DEFA1/DEFA5/HAMP	21
BP	GO:0042129	regulation of T cell proliferation	49/2932	182/18903	5.16661e-05	0.00117029	0.00096015	IL10/CD40LG/LILRB4/ANXA1/IL18/IL27/JAK3/CD28/AIF1/FADD/TNFSF13B/CEBPB/ARG1/CD55/PYCARD/ZBTB7B/VSIG4/BCL6/PDCD1LG2/CD274/CR1/RAC2/HLA-A/IGFBP2/VSIR/BMI1/PNP/DLG5/SELENOK/LILRB1/LGALS9/IL1B/IRF1/JAK2/CLEC4G/TNFRSF13C/MIR21/LGALS3/IDO1/IL23R/SPTA1/EBI3/HLA-G/CD276/CD24/IL1A/IGF2/IGF1/IL21	49
BP	GO:0090594	inflammatory response to wounding	10/2932	17/18903	5.38239e-05	0.00121474	0.000996624	PPARG/TIMP1/GRN/ALOX5/HMOX1/MDK/TGFB1/TLR4/MIR21/IL1A	10
BP	GO:0048144	fibroblast proliferation	32/2932	103/18903	5.46972e-05	0.00123	0.00100914	KMT2A/S100A6/IFI30/NLRC3/GAS6/NUPR1/PRDX1/CDKN1A/CD300A/SPHK1/E2F1/CDC6/BMI1/FTH1/CKS2/DACH1/PML/PARP10/CDK1/PDGFD/NDUFS4/GPX1/E2F8/CCNB1/CD248/CAV1/AQP1/CCNA2/SFRP1/LIF/IGF1/PDGFC	32
BP	GO:0032946	positive regulation of mononuclear cell proliferation	42/2932	149/18903	5.54392e-05	0.0012422	0.00101915	MYD88/BST1/CD40LG/NFATC2/ANXA1/IL18/JAK3/BCL2/CD28/AIF1/FADD/TNFSF13B/CD55/PYCARD/CDKN1A/BCL6/PDCD1LG2/CD274/GPR183/HLA-A/IGFBP2/BMI1/PNP/SELENOK/FCRL3/LGALS9/IL1B/JAK2/TNFRSF13C/TLR4/MIR21/IL23R/SPTA1/EBI3/EPHB2/CD276/CD24/IL1A/BCL2L1/IGF2/IGF1/IL21	42
BP	GO:0022408	negative regulation of cell-cell adhesion	53/2932	202/18903	5.5678e-05	0.00124308	0.00101987	IL10/ZC3H8/DUSP3/LILRB4/CCL28/ANXA1/JAK3/CEACAM1/MAD2L2/PRKCD/CEBPB/ARG1/ZBTB7B/SPI1/IL1RN/CD300A/VSIG4/IL4R/TNFAIP8L2/BCL6/PDCD1LG2/CD274/CR1/SOCS1/VSIR/TRPV4/ZC3H12A/DLG5/LILRB1/TARM1/LGALS9/FCGR2B/MDK/NEXMIF/IRF1/TNR/TGFB1/JAK2/CLEC4G/HLX/MIR21/ADORA2A/LGALS3/IDO1/ASS1/CTSG/CCL25/CXCL12/HLA-G/PRDX2/GLI3/EPCAM/LAG3	53
BP	GO:0071260	cellular response to mechanical stimulus	25/2932	73/18903	5.97022e-05	0.00132816	0.00108968	MYD88/TLR5/CASP1/CASP5/GADD45A/FADD/LTBR/CYBA/HABP4/BAK1/TNFRSF1A/BAD/IL1B/IRF1/MAPK3/TLR4/KCNJ2/FAS/AQP1/WNT11/SLC2A1/CHEK1/PIEZO2/COL1A1/IL33	25
BP	GO:0070302	regulation of stress-activated protein kinase signaling cascade	52/2932	198/18903	6.33703e-05	0.00140475	0.00115251	RASGRP1/MYD88/FOXO1/EDAR/TRAF5/DUSP3/GADD45B/TNIK/GADD45A/FKTN/ZMYND11/PRDX1/NAIP/DNAJA1/MMP8/LTBR/PYCARD/SPI1/STK3/SPHK1/MDFIC/WNT7A/GADD45G/PDCD10/TRPV4/ZC3H12A/DUSP1/NCF1/IL1B/HGF/FCGR2B/PBK/EIF2AK2/CCN2/MAPK3/PINK1/FLT4/MAP3K11/SIRPA/CCR7/NOD2/DACT1/TLR4/PRKN/FAS/INAVA/KLHL31/SFRP1/IL26/PER1/SEMA3A/IL1A	52
BP	GO:0010466	negative regulation of peptidase activity	65/2932	263/18903	6.39842e-05	0.00140971	0.00115658	GAPDH/LAMTOR5/CST7/RECK/CSTA/SERPINB1/CARD16/NOL3/SLPI/GAS6/CSTB/SPOCK2/TIMP1/NAIP/CDKN2D/CTSB/BST2/MMP9/SERPINB10/SERPINA1/CARD17P/PRDX5/ARRB2/POR/SERPINB2/PLAUR/IFI16/FURIN/CR1/SIAH2/MICAL1/IFI6/TIMP4/SERPING1/RENBP/BIRC5/TFPI/LTF/PTTG1/HGF/WFDC1/ANOS1/SPINK8/GPX1/ADORA2A/NLRP7/ECM1/PROS1/LAMP3/COL4A3/AQP1/C4B/C4A/COL7A1/GPC3/THBS1/SNCA/PI3/ANXA8L1/ANXA8/SPINK9/WFIKKN1/PCSK1N/TIMP3/DPEP1	65
BP	GO:0062208	positive regulation of pattern recognition receptor signaling pathway	18/2932	45/18903	6.40467e-05	0.00140971	0.00115658	TLR5/FLOT1/CD14/CYBA/IFI35/TLR2/HSPA1B/LTF/HSPA1A/OASL/SLC15A3/NR1H3/RSAD2/TLR4/CAV1/DHX58/DDX60/TRIM15	18
BP	GO:0007091	metaphase/anaphase transition of mitotic cell cycle	30/2932	95/18903	6.59411e-05	0.00143434	0.00117679	SMARCD3/MAD2L1BP/ATM/MAD2L2/UBE2C/CDC6/DLGAP5/BIRC5/DUSP1/SPC25/AURKB/USP44/CDC20/TTK/BUB1/PLK1/SPC24/ESPL1/CDK5RAP2/ZWINT/BUB1B/CDT1/NUF2/CCNB1/TRIP13/CENPE/CDCA8/HASPIN/NDC80/CENPF	30
BP	GO:1902099	regulation of metaphase/anaphase transition of cell cycle	30/2932	95/18903	6.59411e-05	0.00143434	0.00117679	SMARCD3/MAD2L1BP/ATM/MAD2L2/UBE2C/CDC6/DLGAP5/BIRC5/DUSP1/SPC25/AURKB/USP44/CDC20/TTK/BUB1/PLK1/SPC24/ESPL1/CDK5RAP2/ZWINT/BUB1B/CDT1/NUF2/CCNB1/TRIP13/CENPE/CDCA8/HASPIN/NDC80/CENPF	30
BP	GO:0045862	positive regulation of proteolysis	86/2932	372/18903	6.6087e-05	0.00143434	0.00117679	EPHA4/S100A9/S100A8/AIM2/NLRC4/PPARG/SPON1/PRELID1/GBA1/AXIN2/CASP1/RBX1/NUPR1/GPER1/CTSH/CTSD/TNFSF10/FADD/USP13/PLGRKT/GRN/GABARAP/ACVR1C/CEBPA/PSENEN/PYCARD/HPN/CLU/AURKAIP1/ELOB/PCOLCE2/TRIB1/IFI16/ADAM9/BAK1/FURIN/CR1/NKX3-1/RGMA/TNIP1/P2RX1/TRIB2/VSIR/ZC3H12A/NDUFA13/BAD/PML/NLRP12/F12/HSPA1B/ST20/CDC20/LGALS9/DLC1/DISC1/IL1B/HSPA1A/ASPH/PSME2/CCN2/JAK2/PINK1/GSN/ADAM8/PLK1/FIS1/AURKA/HSPE1…	86
BP	GO:0051098	regulation of binding	86/2932	372/18903	6.6087e-05	0.00143434	0.00117679	TXN/EPHA4/NOG/LEF1/GTF2B/HMGB2/LAMTOR5/IL10/PPARG/SPON1/GATA3/SMARCD3/LRPAP1/CARD16/CTSZ/B2M/FLOT1/SLPI/TAF10/DHRS7B/C4orf3/MAD2L2/CDON/MMP9/PRKCD/MMP8/HABP4/TIAM1/ARRB2/PLAUR/CDKN1A/PARP9/TRIM21/STK3/IFI16/RALB/E2F1/NIBAN2/CDK5/BCL3/RGMA/HDAC4/NME1/TGFBR3/ANGPT1/HJURP/AURKB/GMNN/PCSK9/DISC1/HMOX1/RARA/RAP1GAP/NFKBIA/TGFB1/CLIC2/MAPK3/JAK2/BAMBI/TRIM6/FOXC1/PLK1/AURKA/DACT1/H1-0/NEK2/PRKN/CDT1/SP…	86
BP	GO:0140014	mitotic nuclear division	77/2932	325/18903	6.66426e-05	0.00144138	0.00118257	SMARCD3/MAD2L1BP/ATM/CHMP5/MAD2L2/CD28/UBE2C/AURKAIP1/MAP9/UBE2S/CHMP2A/SPHK1/PKMYT1/CDC6/DLGAP5/NCAPH2/BIRC5/DUSP1/HSPA1B/SPC25/AURKB/CDC25C/CDCA5/KIF4A/USP44/CDC20/ANLN/KIF18B/IL1B/HSPA1A/TTK/PTTG1/KIF14/TGFA/NUSAP1/KLHDC8B/KIFC1/TPX2/CDCA2/BUB1/PLK1/SPC24/ESPL1/AURKA/CDK5RAP2/MYBL2/MKI67/NCAPG/KIF11/NEK2/KIF23/ZWINT/BUB1B/CDT1/NUF2/KIF15/CCNB1/DSCC1/TUBG1/CHMP4C/KIF2C/ESCO2/FBXO43/TRIP13/CENPE…	77
BP	GO:0052372	modulation by symbiont of entry into host	20/2932	53/18903	6.83249e-05	0.00146777	0.00120422	MID2/IFITM1/LGALS1/SNX3/IFITM3/TRIM25/NECTIN2/FCN1/IFITM2/TRIM21/FURIN/TRIM22/LGALS9/LY6E/PTX3/GSN/TRIM6/CAV1/TRIM10/TMPRSS2	20
BP	GO:0002823	negative regulation of adaptive immune response based on somatic recombination of immune receptors built from immunoglobulin superfamily domains	21/2932	57/18903	6.8334e-05	0.00146777	0.00120422	IL7R/LILRB4/JAK3/CEACAM1/CR2/ARG1/CD55/ZBTB7B/IL4R/BCL6/CR1/SUSD4/ZC3H12A/LILRB1/CR1L/FCGR2B/CLEC4G/NOD2/HLA-G/IL1RL1/IL33	21
BP	GO:1901991	negative regulation of mitotic cell cycle phase transition	51/2932	194/18903	7.21251e-05	0.00154387	0.00126666	MAD2L1BP/ATM/BCL2/MAD2L2/MIIP/CACNB4/CDKN1A/CDC6/MUC1/BIRC5/PML/DUSP1/SPC25/CDK1/AURKB/USP44/CDC20/CLSPN/GTSE1/TTK/MIR451A/BUB1/PLK1/SPC24/DTL/CDK5RAP2/DACT1/INHBA/ZWINT/BUB1B/CDT1/NUF2/CCNB1/CHMP4C/TICRR/PLK3/TRIP13/NBN/CCL2/CHEK1/CDCA8/HASPIN/ORC1/NDC80/KANK2/TREX1/CENPF/E2F7/MYO16/GJC2/FAM107A	51
BP	GO:0045861	negative regulation of proteolysis	82/2932	352/18903	7.33032e-05	0.00156372	0.00128294	EPHA4/GAPDH/LAMTOR5/IL10/FHIT/CST7/RECK/CSTA/SERPINB1/CARD16/CTSZ/NOL3/SLPI/GAS6/CSTB/SPOCK2/TIMP1/NAIP/CDKN2D/CTSB/BST2/MMP9/GABARAPL2/SERPINB10/SERPINA1/CARD17P/PRDX5/ARRB2/POR/SERPINB2/PLAUR/TRIM21/IL1R2/IFI16/FURIN/CR1/CDK5/SIAH2/MICAL1/IFI6/TIMP4/SERPING1/RENBP/BIRC5/PML/TFPI/LTF/PTTG1/HGF/WFDC1/ANOS1/PBK/F8A2/NR1H3/SPINK8/GPX1/PLAU/ADORA2A/GAS1/NLRP7/F8A3/ECM1/PROS1/LAMP3/CHAC1/COL4A3/AQP1/…	82
BP	GO:0050671	positive regulation of lymphocyte proliferation	41/2932	146/18903	7.41162e-05	0.00157548	0.00129259	MYD88/BST1/CD40LG/NFATC2/ANXA1/IL18/JAK3/BCL2/CD28/AIF1/FADD/TNFSF13B/CD55/PYCARD/CDKN1A/BCL6/PDCD1LG2/CD274/GPR183/HLA-A/IGFBP2/BMI1/PNP/SELENOK/FCRL3/LGALS9/IL1B/JAK2/TNFRSF13C/TLR4/MIR21/IL23R/SPTA1/EBI3/EPHB2/CD276/CD24/IL1A/IGF2/IGF1/IL21	41
BP	GO:0002532	production of molecular mediator involved in inflammatory response	31/2932	100/18903	7.43606e-05	0.00157548	0.00129259	MYD88/LILRB4/NLRC3/MAPK14/GRN/ALOX5AP/ALOX5/ABCD2/PYCARD/IL1R2/IL4R/IL17RA/P2RX1/ABCD1/ZC3H12A/GPSM3/NCF1/SIRPA/NOD2/TLR4/MIR21/PLD4/SLAMF8/NLRP7/GBP5/PRDX2/EPHB2/PER1/MACIR/H19/APOD	31
BP	GO:0051403	stress-activated MAPK cascade	60/2932	239/18903	7.48915e-05	0.00158135	0.00129741	RASGRP1/MYD88/FOXO1/EDAR/TRAF5/DUSP3/GADD45B/TNIK/GADD45A/FKTN/ZMYND11/PRDX1/MAPK14/MAP2K6/NAIP/DNAJA1/MMP8/LTBR/MAP3K20/PYCARD/SPI1/TRIB1/STK3/SPHK1/ZFP36/MDFIC/WNT7A/GADD45G/PDCD10/TRPV4/ZC3H12A/DUSP1/LGALS9/NCF1/MAP2K3/IL1B/HGF/FCGR2B/PBK/EIF2AK2/CCN2/MAPK3/PINK1/FLT4/MAP3K11/SIRPA/CCR7/NOD2/DACT1/TLR4/PRKN/FAS/INAVA/KLHL31/SFRP1/IL26/PER1/SEMA3A/IL1A/MAPK10	60
BP	GO:0006801	superoxide metabolic process	25/2932	74/18903	7.70072e-05	0.00162053	0.00132955	BST1/CD177/ITGAM/PRDX1/NCF4/TYROBP/PRKCD/CYBA/IMMP2L/SH3PXD2B/NCF1C/FBLN5/NCF1B/NCF1/CBS/TGFB1/LOC102724560/FPR2/GCH1/MPO/PRG3/MIR21/ACP5/PRDX2/H19	25
BP	GO:0042092	type 2 immune response	16/2932	38/18903	7.807e-05	0.00163737	0.00134336	IL10/GATA3/BATF/ANXA1/IL18/ARG1/IL4R/BCL6/BCL3/RARA/HLX/NOD2/RSAD2/IDO1/ECM1/IL33	16
BP	GO:0001910	regulation of leukocyte mediated cytotoxicity	28/2932	87/18903	7.84888e-05	0.00164063	0.00134604	IL7R/RASGRP1/B2M/ITGAM/CEACAM1/FADD/TYROBP/NECTIN2/ARG1/ARRB2/SPI1/VAV1/KLRC4/HLA-A/ICAM1/LILRB1/LGALS9/HLA-H/FCGR2B/CD1C/CD1E/KIR2DL4/IL23R/DNASE1L3/SLC22A13/HLA-G/LAG3/IL21	28
BP	GO:0050878	regulation of body fluid levels	89/2932	390/18903	8.16662e-05	0.00170133	0.00139584	CLIC1/MYL12A/FCER1G/ADM/CD40LG/TXK/PLSCR1/C1GALT1C1/GBA1/CD59/IL18/GAS6/ILK/ST3GAL4/MAPK14/MTX1/CEACAM1/DGKE/NFE2/EXT1/PRKCD/SERPINA1/OPRL1/CYBA/EMILIN2/PLA2G4A/FERMT3/SERPINB2/PLAUR/ZBTB7B/VAV1/AKAP11/TPH1/UGCG/HYAL2/PRKACB/P2RX1/EDNRB/NME1/SERPING1/TRPV4/PLEK/CELSR2/F5/TFPI/F12/FAP/TIFAB/PRL/GP1BB/DCANP1/SLC29A2/JAK2/TREML1/MERTK/NR1H3/HSPB1/MYL9/SELP/PLAU/TLR4/CORO2B/ADORA2A/PF4/PROS1/CTSG/CAV…	89
BP	GO:0031589	cell-substrate adhesion	85/2932	369/18903	8.29453e-05	0.00172222	0.00141298	ADAMTS12/CD63/BST1/DUSP3/CCL28/ITGA7/PTPRK/CD96/GPM6B/ITGA6/GAS6/ILK/ITGAM/SPOCK2/PHLDB2/NTNG2/BCL2/ACVRL1/KANK1/TIAM1/FERMT3/AJAP1/NTN4/ADAM9/BCL6/TRIP6/CDK5/RAC2/FBLN5/FBLN2/ZYX/RRAS/COL17A1/ANGPT1/DLC1/DISC1/EPHA1/CASS4/ITGA2B/PARVA/KIF14/LAMB3/MDK/NEXMIF/CCN2/JAK2/GBP1/GFUS/MERTK/OLFM4/CCR7/SIGLEC1/PLAU/CORO2B/EFEMP2/MMP14/ATP1B2/FZD4/COL13A1/ID1/ITGA9/CEACAM6/NDNF/CCL25/LYVE1/BCAM/MICALL2/CO…	85
BP	GO:0048872	homeostasis of number of cells	71/2932	296/18903	8.36544e-05	0.00173117	0.00142033	ETS1/KMT2A/AKT3/GCNT4/IL7R/HMGB2/ZC3H8/GATA3/GBA1/CCR4/ANXA1/B2M/DOCK10/PRDX1/MAPK14/JAK3/BCL2/EXT1/FADD/TNFSF13B/ZNHIT1/JMJD6/SPI1/SEPTIN4/BCL6/ACVR1B/BAK1/GPR183/ZFP36/TCIRG1/GPR174/RHAG/TGFBR3/CCNB2/HSPA1B/AHSP/ISG15/LGALS9/CCN3/KIT/HSPA1A/HMOX1/BPGM/JAK2/MERTK/HCAR2/CCR7/DYRK3/CDH2/EPAS1/INHBA/ALAS2/FAS/SPTA1/TSPO2/FLT3/GLIS2/KLF1/NLRP6/TNFRSF17/TRIM10/PRDX2/TAL1/SLC4A1/GATA1/FAM210B/TRIM58/H…	71
BP	GO:0045619	regulation of lymphocyte differentiation	54/2932	210/18903	8.52529e-05	0.00175841	0.00144267	LEF1/IL7R/RASGRP1/TCF7/IL10/ZC3H8/TESPA1/CAMK4/GATA3/PRELID1/LILRB4/SMARCD3/BATF/ANXA1/IL18/GAS6/IL27/JAK3/VNN1/CD28/PGLYRP1/JUNB/IL15RA/ZBTB7B/IL4R/BCL6/CR1/HMGB3/SOCS1/VSIR/TOX/PNP/ZC3H12A/NFAM1/BAD/FCRL3/LGALS9/RARA/MDK/IRF1/CLEC4G/HLA-DOA/ADAM8/HLX/MIR21/MMP14/INHBA/SLAMF8/IL23R/SFRP1/HLA-G/PRDX2/GLI3/LAG3	54
BP	GO:0030168	platelet activation	38/2932	133/18903	8.95623e-05	0.0018412	0.0015106	CLIC1/MYL12A/FCER1G/CD40LG/TXK/PLSCR1/C1GALT1C1/ILK/MAPK14/CEACAM1/DGKE/PRKCD/EMILIN2/PLA2G4A/FERMT3/VAV1/P2RX1/PLEK/GP1BB/JAK2/TREML1/MERTK/HSPB1/MYL9/SELP/TLR4/PF4/CTSG/GP9/DGKK/PF4V1/MMRN1/MFSD2B/GATA1/PDPN/HBB/DGKI/APOE	38
BP	GO:0022900	electron transport chain	47/2932	176/18903	9.01566e-05	0.00184732	0.00151562	NDUFB3/SLC25A18/NDUFAF1/GBA1/COX6A1/COX7A2/COX5B/NDUFA1/NDUFA2/CHCHD2/NDUFB6/NDUFB1/NDUFC2-KCTD14/COX6B1/UQCR11/UQCR10/CYP19A1/NQO2/NDUFA4/CYBA/IMMP2L/POR/COX7B/UQCRQ/SCO2/NDUFS5/UQCRH/COX8A/ALDH4A1/UQCRHL/CDK1/NDUFS4/NDUFA7/NCF1/MAOB/ASPH/PINK1/GFUS/UQCRB/NDUFB7/IDO1/CCNB1/P4HA2/COX6C/SNCA/PHGDH/GLDC	47
BP	GO:0061082	myeloid leukocyte cytokine production	19/2932	50/18903	9.24296e-05	0.00187592	0.00153908	MYD88/TGFB3/PYCARD/UBE2J1/BCL6/IRAK3/LILRB1/RABGEF1/KIT/HMOX1/TGFB1/LITAF/PRG2/NOD2/TLR4/GPRC5B/RIGI/ACP5/HLA-G	19
BP	GO:2001238	positive regulation of extrinsic apoptotic signaling pathway	19/2932	50/18903	9.24296e-05	0.00187592	0.00153908	GPER1/G0S2/TNFSF10/FADD/LTBR/PYCARD/STK3/RBCK1/HYAL2/PML/ATF3/DEDD2/TNFRSF12A/INHBA/CAV1/THBS1/SFRP1/TIMP3/ITM2C	19
BP	GO:0006979	response to oxidative stress	97/2932	434/18903	9.24556e-05	0.00187592	0.00153908	TXN/CHD6/PLEKHA1/HP/MGST1/FOXO1/IL10/IDH1/MSRB2/TRPM2/PTPRK/ANXA1/NOL3/FKBP1B/CHCHD2/GPR37L1/PRDX1/BCL2/VNN1/ATOX1/ACOX2/AIF1/FOSL1/MMP9/PRKCD/ARG1/PRDX5/ALOX5/MTF1/ADAM9/MCTP1/CAMKK2/SPHK1/BAK1/HYAL2/ALDH3B1/FBLN5/PDCD10/ABCD1/ROMO1/ZC3H12A/SELENOK/BAD/PML/HSPA1B/CDK1/PJVK/NME8/PDGFD/AREG/NCF1/MSRA/HSPA1A/HMOX1/HGF/PRDX4/MAPK3/JAK2/PINK1/MELK/MSRB3/SIRPA/HSPB1/PYCR1/CYP1B1/GCH1/SDC1/NAPRT/GPX1/T…	97
BP	GO:0061900	glial cell activation	20/2932	54/18903	9.28163e-05	0.00187712	0.00154007	CST7/ITGAM/ATM/IFNGR2/C1QA/AIF1/TYROBP/GRN/NR1D1/MMP8/IFNGR1/CLU/SPHK1/TLR2/IL1B/JAK2/ADORA2A/AZU1/SNCA/IL33	20
BP	GO:0010876	lipid localization	106/2932	483/18903	9.64056e-05	0.0019434	0.00159445	PTCH1/PPARG/PLSCR1/PRELID1/GBA1/ANXA1/TMEM30B/DBI/PLIN3/GM2A/ABCB1/TNFAIP8L3/LAMTOR1/RETN/CEACAM1/MAP2K6/PLTP/TTC39B/ATP8B2/CYP19A1/TSPO/PRKCD/GRAMD1A/SLC51A/FABP5/SLC66A2/ACSL1/ABCD2/ACVR1C/PLA2G4A/FFAR2/ATP8A2/VAPA/CLU/VPS13A/NTSR1/ATP9A/STARD4/LRP10/UGCG/FURIN/PCTP/NPC2/NKX3-1/AQP9/CETP/ATG9A/ABCD1/ZC3H12A/ERFE/FABP2/EHD1/ENPP1/CES1/SLCO2B1/PLIN5/PCSK9/APOBR/IL1B/RBP4/APOL4/PLSCR4/PLSCR2/APOL1…	106
BP	GO:0009612	response to mechanical stimulus	54/2932	211/18903	9.75538e-05	0.0019602	0.00160823	MYD88/PTCH1/TLR5/CASP1/CASP5/GADD45A/SLC1A3/MAPK14/RETN/FADD/FOSL1/LTBR/CYBA/HABP4/USP53/ATP8A2/HPN/TMEM120A/BAK1/IGFBP2/TRPV4/TNFRSF1A/BAD/PJVK/STRBP/TIFAB/IL1B/KIT/NFKBIA/MDK/DCANP1/IRF1/MAPK3/GSN/CXCL10/TLR4/CDH2/PKD2L1/MPO/MMP14/CNTNAP2/MMP2/KCNJ2/FAS/AQP1/WNT11/SLC2A1/CHEK1/THBS1/CXCL12/PIEZO2/COL1A1/RYR2/IL33	54
BP	GO:1901988	negative regulation of cell cycle phase transition	66/2932	272/18903	0.000101733	0.00203759	0.00167173	FBXO6/MAD2L1BP/ATM/MAPK14/BCL2/MAD2L2/APBB1/MIIP/CDKN2D/CACNB4/MAP3K20/CDKN1A/E2F1/NKX3-1/CDC6/MUC1/BIRC5/CDC45/PML/DUSP1/SPC25/CDK1/AURKB/USP44/CDC20/CLSPN/GTSE1/TTK/ATF5/APBB2/PBK/MIR451A/BUB1/PLK1/SPC24/DTL/CDK5RAP2/DACT1/OVOL1/H2AX/INHBA/ZWINT/BUB1B/CDT1/NUF2/CCNB1/CHMP4C/TICRR/PLK3/TRIP13/NBN/CCL2/RAD51/CHEK1/CDCA8/HASPIN/ORC1/NDC80/KANK2/TREX1/RPA4/CENPF/E2F7/MYO16/GJC2/FAM107A	66
BP	GO:0061644	protein localization to CENP-A containing chromatin	10/2932	18/18903	0.000104245	0.00208122	0.00170752	H4C8/H4C4/H2AC8/H4C11/H4C12/H4C5/CENPA/H2BC11/H4C9/H4C3	10
BP	GO:0045064	T-helper 2 cell differentiation	9/2932	15/18903	0.000105106	0.00209171	0.00171613	GATA3/BATF/ANXA1/IL18/IL4R/BCL6/BCL3/RARA/HLX	9
BP	GO:0010951	negative regulation of endopeptidase activity	62/2932	252/18903	0.000107016	0.00212293	0.00174174	GAPDH/LAMTOR5/CST7/RECK/CSTA/SERPINB1/CARD16/NOL3/SLPI/GAS6/CSTB/SPOCK2/TIMP1/NAIP/CDKN2D/BST2/MMP9/SERPINB10/SERPINA1/CARD17P/PRDX5/ARRB2/POR/SERPINB2/PLAUR/IFI16/FURIN/CR1/SIAH2/MICAL1/IFI6/TIMP4/SERPING1/RENBP/BIRC5/TFPI/LTF/PTTG1/HGF/WFDC1/ANOS1/SPINK8/GPX1/ADORA2A/NLRP7/PROS1/LAMP3/COL4A3/AQP1/C4B/C4A/COL7A1/THBS1/SNCA/PI3/ANXA8L1/ANXA8/SPINK9/WFIKKN1/PCSK1N/TIMP3/DPEP1	62
BP	GO:0031099	regeneration	50/2932	192/18903	0.000109049	0.00215641	0.00176921	EPHA4/ANXA3/MTR/IL10/PTCH1/ADM/TXK/ANXA1/GAS6/FKBP1B/BCL2/GRN/TSPO/CEBPB/KREMEN1/CDKN1A/BAK1/PTPRS/WNT7A/RGMA/TGFBR3/CDK1/CCN3/HMOX1/SLC7A5/HGF/MDK/TNR/JAK2/OMG/APOA2/AURKA/PGF/GPX1/SCARF1/MMP2/NEFL/KLF5/NNMT/CCNA2/FLT3/TYMS/CXCL12/GLI3/GATA1/PTPRU/IGF1/HAMP/PTPRF/APOD	50
BP	GO:0070613	regulation of protein processing	23/2932	67/18903	0.000111483	0.00219756	0.00180297	NLRC4/SPON1/CST7/CARD16/CTSZ/NOL3/PLGRKT/PLAUR/HPN/IL1R2/PRKACB/F12/GSN/ADAM8/CLEC3B/PLAU/MMP14/GAS1/NLRP7/CHAC1/THBS1/PRSS37/TMEM98	23
BP	GO:0032728	positive regulation of interferon-beta production	16/2932	39/18903	0.000113424	0.00222876	0.00182857	HMGB2/RNF135/FLOT1/IRF7/OAS1/TLR2/HSP90AA1/ISG15/IRF1/TLR4/RIOK3/OAS3/DHX58/OAS2/IFIH1/RIGI	16
BP	GO:0032731	positive regulation of interleukin-1 beta production	22/2932	63/18903	0.000117042	0.00229262	0.00188096	LILRA5/AIM2/MYD88/NLRC4/CASP1/NAIP/TYROBP/PYCARD/IFI16/ORM1/GSDMD/NLRP12/ORM2/LGALS9/LILRA2/JAK2/HSPB1/NOD2/TLR4/GBP5/INAVA/AZU1	22
BP	GO:0002444	myeloid leukocyte mediated immunity	32/2932	107/18903	0.000122986	0.00237792	0.00195094	FCGR1A/ANXA3/RASGRP1/MYD88/CD177/MILR1/ITGAM/FGR/LAT2/TYROBP/FES/ARG1/STXBP2/SPI1/CD300A/IL4R/RAC2/PTGDR/RABGEF1/LGALS9/KIT/HMOX1/FCGR2B/DNASE1L3/CTSG/ELANE/IGHG1/RIGI/NLRP6/AZU1/GATA1/SCNN1B	32
BP	GO:0033045	regulation of sister chromatid segregation	32/2932	107/18903	0.000122986	0.00237792	0.00195094	SMARCD3/MAD2L1BP/ATM/MAD2L2/UBE2C/CDC6/DLGAP5/BIRC5/DUSP1/SPC25/AURKB/USP44/CDC20/TTK/PTTG1/RMI2/BUB1/PLK1/SPC24/ESPL1/CDK5RAP2/ZWINT/BUB1B/CDT1/NUF2/CCNB1/TRIP13/CENPE/CDCA8/HASPIN/NDC80/CENPF	32
BP	GO:0032642	regulation of chemokine production	30/2932	98/18903	0.000124358	0.00237792	0.00195094	MYD88/IL10/LILRB4/IL18/FFAR3/AIF1/FFAR2/PYCARD/IL4R/IL17RA/OAS1/TRPV4/TLR2/SELENOK/LGALS9/IL1B/HMOX1/EIF2AK2/SIRPA/NOD2/TLR4/OAS3/ELANE/ACKR1/AZU1/EPHA2/IL1RL1/IL33/ALOX15B/APOD	30
BP	GO:0044784	metaphase/anaphase transition of cell cycle	30/2932	98/18903	0.000124358	0.00237792	0.00195094	SMARCD3/MAD2L1BP/ATM/MAD2L2/UBE2C/CDC6/DLGAP5/BIRC5/DUSP1/SPC25/AURKB/USP44/CDC20/TTK/BUB1/PLK1/SPC24/ESPL1/CDK5RAP2/ZWINT/BUB1B/CDT1/NUF2/CCNB1/TRIP13/CENPE/CDCA8/HASPIN/NDC80/CENPF	30
BP	GO:0042743	hydrogen peroxide metabolic process	20/2932	55/18903	0.000124765	0.00237792	0.00195094	HP/PRDX1/PRDX5/CYBA/RAC2/MAOB/PRDX4/PINK1/GPX1/MPO/HBM/PRDX2/CYP1A1/SNCA/HBD/HBB/LPO/HBQ1/HBG1/HBG2	20
BP	GO:0001774	microglial cell activation	18/2932	47/18903	0.000124953	0.00237792	0.00195094	CST7/ITGAM/ATM/IFNGR2/C1QA/AIF1/TYROBP/GRN/NR1D1/MMP8/IFNGR1/CLU/SPHK1/TLR2/JAK2/AZU1/SNCA/IL33	18
BP	GO:0090199	regulation of release of cytochrome c from mitochondria	18/2932	47/18903	0.000124953	0.00237792	0.00195094	PRELID1/NOL3/GPER1/TNFSF10/MMP9/ARRB2/PYCARD/PLAUR/CLU/BIK/BAK1/BAD/HGF/PINK1/GPX1/PRKN/BCL2L1/IGF1	18
BP	GO:1902622	regulation of neutrophil migration	18/2932	47/18903	0.000124953	0.00237792	0.00195094	MYD88/BST1/C3AR1/DPP4/TNFAIP6/FUT7/RHOG/RAC2/SELENOK/MIR223/MPP1/MDK/ADAM8/CCR7/NOD2/IL1R1/SLAMF8/IL1A	18
BP	GO:0051092	positive regulation of NF-kappaB transcription factor activity	42/2932	154/18903	0.000125502	0.00237792	0.00195094	S100A9/S100A8/MID2/S100A12/AIM2/MYD88/PSMA6/LAMTOR5/NLRC4/CD40LG/TRAF5/CARD16/IL18/FLOT1/RTKN2/FLOT2/TRIM25/IL18RAP/RPS6KA5/PYCARD/CLU/IL18R1/NTSR1/TRIM21/IRAK3/SPHK1/RBCK1/TRIM22/TLR2/HSPA1B/LGALS9/LTF/IL1B/HSPA1A/EIF2AK2/TRIM6/ADAM8/NOD2/TLR4/CAV1/IRAK2/TRIM15	42
BP	GO:0098754	detoxification	42/2932	154/18903	0.000125502	0.00237792	0.00195094	GSTO1/TXN/S100A9/HP/MGST1/TXNDC17/ABCB1/PRDX1/ALOX5AP/PRDX5/MTARC1/MT2A/FBLN5/MT1E/MT1G/MT1F/GSTM3/PRDX4/CLIC2/TXNRD3/MIR451A/ABCB6/MT1H/GCH1/GPX1/MPO/SLC22A18/MIR21/MT1X/HBM/ABCG2/PRDX2/PTGES/HBD/ALB/H19/HBB/LPO/APOE/HBQ1/HBG1/HBG2	42
BP	GO:0006809	nitric oxide biosynthetic process	25/2932	76/18903	0.000125596	0.00237792	0.00195094	GLA/IL10/DDAH2/RORA/AIF1/TSPO/MMP8/CLU/MTARC1/ZC3H12A/HSP90AA1/CYB5R3/IL1B/PTX3/JAK2/SPR/SIRPA/CYP1B1/GCH1/TLR4/ASS1/CAV1/ACP5/NOS1AP/HBB	25
BP	GO:1903317	regulation of protein maturation	24/2932	72/18903	0.000134916	0.00254665	0.00208937	NLRC4/SPON1/CST7/CARD16/CTSZ/NOL3/PLGRKT/PLAUR/HPN/IL1R2/PRKACB/F12/GSN/ADAM8/CLEC3B/PLAU/MMP14/GAS1/NLRP7/CHAC1/THBS1/PRSS37/TFR2/TMEM98	24
BP	GO:0006869	lipid transport	96/2932	433/18903	0.000136736	0.00257321	0.00211116	PTCH1/PPARG/PLSCR1/PRELID1/ANXA1/TMEM30B/DBI/GM2A/ABCB1/TNFAIP8L3/LAMTOR1/RETN/CEACAM1/MAP2K6/PLTP/TTC39B/ATP8B2/CYP19A1/TSPO/PRKCD/GRAMD1A/SLC51A/FABP5/SLC66A2/ACSL1/ABCD2/PLA2G4A/ATP8A2/VAPA/CLU/VPS13A/NTSR1/ATP9A/STARD4/LRP10/UGCG/FURIN/PCTP/NPC2/NKX3-1/AQP9/CETP/ATG9A/ABCD1/ERFE/FABP2/CES1/SLCO2B1/PCSK9/APOBR/IL1B/RBP4/APOL4/PLSCR4/PLSCR2/APOL1/NFKBIA/GRAMD1C/NR1H3/STOML1/APOA2/RBP7/FIS1/APOL…	96
BP	GO:0002706	regulation of lymphocyte mediated immunity	47/2932	179/18903	0.000139807	0.00262306	0.00215207	FCGR1A/IL7R/RASGRP1/IL10/GATA3/LILRB4/CD96/B2M/IL18/CEACAM1/MAD2L2/CD28/CR2/FADD/NECTIN2/TNFSF13/ARG1/FUT7/ARRB2/CD55/VAV1/IL18R1/KLRC4/BCL6/CR1/HLA-A/ARID5A/SUSD4/LILRB1/LGALS9/HLA-H/IL1B/CR1L/FCGR2B/TGFB1/CD1C/CLEC4G/CD1E/NOD2/RSAD2/IL1R1/KIR2DL4/IL23R/SLC22A13/HLA-G/LAG3/IL21	47
BP	GO:0010952	positive regulation of peptidase activity	50/2932	194/18903	0.000143829	0.00269042	0.00220733	EPHA4/S100A9/S100A8/AIM2/NLRC4/PPARG/PRELID1/CASP1/GPER1/CTSH/CTSD/TNFSF10/FADD/GRN/ACVR1C/PSENEN/PYCARD/PCOLCE2/IFI16/BAK1/CR1/NKX3-1/P2RX1/VSIR/NDUFA13/BAD/PML/NLRP12/ST20/LGALS9/DLC1/ASPH/PSME2/CCN2/JAK2/PINK1/GSN/FIS1/HSPE1/MIR21/FAS/COL4A3/CAV1/F3/HIP1/NLRP6/SOX7/MAPK12/SNCA/ROBO1	50
BP	GO:0045637	regulation of myeloid cell differentiation	54/2932	214/18903	0.000144785	0.00269383	0.00221013	ETS1/LEF1/C1QC/HMGB2/CAMK4/LILRB4/H4C8/B2M/H4C4/ZBTB46/MAPK14/CEACAM1/TFE3/FADD/TYROBP/FES/CEBPB/TNFAIP6/LILRB3/IRF7/SPI1/FSTL3/TRIB1/ACVR1B/HMGB3/ZFP36/H4C11/CCR1/H4C12/H4C5/LILRB1/HSPA1B/ISG15/MIR223/GPR137/LTF/CSF3R/HSPA1A/RARA/NFKBIA/TGFB1/TLR4/PF4/INHBA/IL23R/H4C9/H4C3/SFRP1/CLDN18/TAL1/GATA1/LIF/FAM210B/FBN1	54
BP	GO:0000070	mitotic sister chromatid segregation	52/2932	204/18903	0.000144876	0.00269383	0.00221013	SMARCD3/MAD2L1BP/ATM/CHMP5/MAD2L2/UBE2C/CHMP2A/CDC6/DLGAP5/NCAPH2/BIRC5/DUSP1/SPC25/AURKB/CDCA5/KIF4A/USP44/CDC20/KIF18B/TTK/PTTG1/KIF14/NUSAP1/KIFC1/BUB1/PLK1/SPC24/ESPL1/CDK5RAP2/NCAPG/KIF11/NEK2/KIF23/ZWINT/BUB1B/CDT1/NUF2/CCNB1/DSCC1/TUBG1/CHMP4C/KIF2C/ESCO2/TRIP13/CENPE/CDCA8/HASPIN/NDC80/SPAG5/NCAPH/CENPF/KIF18A	52
BP	GO:0032602	chemokine production	30/2932	99/18903	0.000152279	0.00282305	0.00231615	MYD88/IL10/LILRB4/IL18/FFAR3/AIF1/FFAR2/PYCARD/IL4R/IL17RA/OAS1/TRPV4/TLR2/SELENOK/LGALS9/IL1B/HMOX1/EIF2AK2/SIRPA/NOD2/TLR4/OAS3/ELANE/ACKR1/AZU1/EPHA2/IL1RL1/IL33/ALOX15B/APOD	30
BP	GO:0043122	regulation of I-kappaB kinase/NF-kappaB signaling	62/2932	255/18903	0.000152793	0.00282417	0.00231707	MID2/S100A12/GAPDH/MYD88/LAMTOR5/EDAR/TRAF5/LILRB4/CASP1/CARD16/LGALS1/CLEC4D/NLRC3/RORA/ZMYND11/TNFSF10/TRIM25/FADD/BST2/NR1D1/LTBR/PYCARD/VAPA/SECTM1/SHISA5/TRIM21/TIFA/S100A4/RBCK1/OTUD7A/TNIP1/TRIM22/CLEC6A/ZC3H12A/TNFRSF1A/PLEKHG5/ANGPT1/ALPK1/NLRP12/LGALS9/LTF/IL1B/HMOX1/PINK1/TRIM6/LITAF/CCR7/HSPB1/NOD2/TLR4/RIOK3/PRKN/ECM1/GPRC5B/PPM1N/INAVA/SHARPIN/TSPAN6/NLRP6/IFIT5/PER1/IL1A	62
BP	GO:0001503	ossification	95/2932	429/18903	0.000154544	0.00284809	0.00233669	ADAMTS12/ZBTB40/CLIC1/NOG/LEF1/ACVR2B/PTCH1/IFITM1/PPARG/AXIN2/GPM6B/CLEC5A/ILK/MAPK14/BCL2/MAP2K6/SRGN/FGR/EXT1/SORT1/NR1I3/MMP9/CEBPB/KREMEN1/TGFB3/TNFAIP6/ALOX5/JUNB/CEBPA/CEBPD/H3-3B/SBNO2/FSTL3/SHOX2/FGF9/H3-3A/ALPL/TPH1/NPR2/TWIST2/FAM20C/TCIRG1/CCR1/ENPP1/BMPR1A/ISG15/AREG/LTF/TMEM119/HGF/DCHS1/IGFBP3/CREB3L1/FHL2/MDK/CBS/TGFB1/CCN2/MAPK3/NOCT/LOC102724560/SMAD1/BAMBI/FOXC1/ACHE/KL/COL6A1/…	95
BP	GO:0002688	regulation of leukocyte chemotaxis	36/2932	127/18903	0.000161145	0.00296098	0.00242931	CCR6/BST1/C3AR1/GAS6/DPP4/AIF1/CYP19A1/MTUS1/TNFAIP6/SPI1/RAC2/TRPV4/CCR1/GPSM3/DUSP1/LGALS9/MIR223/CCN3/MPP1/MMP28/MDK/PADI2/RIN3/MAPK3/CXCL10/CXCL17/DDT/CCR7/FPR2/NOD2/PGF/SLAMF8/CCL2/THBS1/CXCL12/CCL7	36
BP	GO:0046597	negative regulation of viral entry into host cell	11/2932	22/18903	0.000163326	0.00297472	0.00244059	MID2/IFITM1/SNX3/IFITM3/TRIM25/FCN1/IFITM2/LY6E/PTX3/GSN/TRIM10	11
BP	GO:0051767	nitric-oxide synthase biosynthetic process	11/2932	22/18903	0.000163326	0.00297472	0.00244059	JAK3/MAP2K6/TLR2/MAP2K3/NAMPT/JAK2/NOD2/TLR4/CCL2/AKAP12/IL33	11
BP	GO:0051769	regulation of nitric-oxide synthase biosynthetic process	11/2932	22/18903	0.000163326	0.00297472	0.00244059	JAK3/MAP2K6/TLR2/MAP2K3/NAMPT/JAK2/NOD2/TLR4/CCL2/AKAP12/IL33	11
BP	GO:0002707	negative regulation of lymphocyte mediated immunity	20/2932	56/18903	0.000166035	0.00301525	0.00247384	IL7R/LILRB4/CD96/CEACAM1/CR2/ARG1/ARRB2/CD55/BCL6/CR1/HLA-A/SUSD4/LILRB1/LGALS9/CR1L/FCGR2B/CLEC4G/NOD2/KIR2DL4/HLA-G	20
BP	GO:0010572	positive regulation of platelet activation	7/2932	10/18903	0.000166672	0.00301803	0.00247611	PLA2G4A/PLEK/GP1BB/JAK2/SELP/TLR4/GP9	7
BP	GO:0015701	bicarbonate transport	13/2932	29/18903	0.000170461	0.00307769	0.00252506	SLC26A8/SLC26A6/SLC4A7/SLC4A10/CA4/BEST1/SLC4A4/RHAG/CYB5R2/SLC4A3/SLC4A9/SLC39A8/SLC4A1	13
BP	GO:0034728	nucleosome organization	42/2932	156/18903	0.000171095	0.0030802	0.00252712	KAT6B/H2BC5/HMGB2/H3C4/SMARCD3/H2BC21/H2BC12/H4C8/H4C4/H2BC18/NFE2/ZNHIT1/H1-2/H2BC6/PADI4/H3-3B/H3-3A/NAP1L3/TSPYL5/NAP1L2/H4C11/BAZ1A/H4C12/H4C5/H2BC8/H2BC12L/H3C14/H3C15/H2BC4/H3C10/H3C12/H1-0/H2AX/H2BC11/H1-6/H1-4/H2BC17/H3C13/H4C9/H4C3/H2BC7/H3C6	42
BP	GO:0031098	stress-activated protein kinase signaling cascade	60/2932	246/18903	0.000176573	0.00316055	0.00259304	RASGRP1/MYD88/FOXO1/EDAR/TRAF5/DUSP3/GADD45B/TNIK/GADD45A/FKTN/ZMYND11/PRDX1/MAPK14/MAP2K6/NAIP/DNAJA1/MMP8/LTBR/MAP3K20/PYCARD/SPI1/TRIB1/STK3/SPHK1/ZFP36/MDFIC/WNT7A/GADD45G/PDCD10/TRPV4/ZC3H12A/DUSP1/LGALS9/NCF1/MAP2K3/IL1B/HGF/FCGR2B/PBK/EIF2AK2/CCN2/MAPK3/PINK1/FLT4/MAP3K11/SIRPA/CCR7/NOD2/DACT1/TLR4/PRKN/FAS/INAVA/KLHL31/SFRP1/IL26/PER1/SEMA3A/IL1A/MAPK10	60
BP	GO:0045930	negative regulation of mitotic cell cycle	60/2932	246/18903	0.000176573	0.00316055	0.00259304	IL10/MAD2L1BP/ATM/BCL2/MAD2L2/MIIP/CACNB4/MAP3K20/CDKN1A/AURKAIP1/BCL6/CDC6/MUC1/BIRC5/PML/DUSP1/SPC25/CDK1/AURKB/USP44/CDC20/CLSPN/GTSE1/TTK/PBK/FOXC1/MIR451A/BUB1/PLK1/SPC24/DTL/CDK5RAP2/DACT1/OVOL1/MIR21/GAS1/INHBA/ZWINT/BUB1B/CDT1/NUF2/CCNB1/CHMP4C/TICRR/PLK3/TRIP13/NBN/CCL2/CHEK1/CDCA8/HASPIN/ORC1/NDC80/KANK2/TREX1/CENPF/E2F7/MYO16/GJC2/FAM107A	60
BP	GO:0062197	cellular response to chemical stress	79/2932	345/18903	0.000177508	0.00316818	0.00259931	TXN/CHD6/PLEKHA1/MGST1/FOXO1/IL10/CASP1/TRPM2/PTPRK/ANXA1/NOL3/CHCHD2/ATM/RBX1/GPR37L1/PRDX1/BCL2/VNN1/AIF1/DNAJA1/TSPO/MMP9/PRKCD/ARG1/PRDX5/ALOX5/PYCARD/TRIM21/CAMKK2/SPHK1/ALDH3B1/FBLN5/PDCD10/ABCD1/ROMO1/TRPV4/ZC3H12A/BAD/PML/HSPA1B/CDK1/PJVK/NME8/PDGFD/NCF1/MSRA/HSPA1A/HMOX1/RELB/HGF/MAPK3/JAK2/PINK1/MELK/SIRPA/HSPB1/PYCR1/CYP1B1/GCH1/EFHD1/GPX1/TLR4/MPO/EPAS1/MIR21/PRKN/MMP2/FAS/CAV1/AQP1/S…	79
BP	GO:0097237	cellular response to toxic substance	35/2932	123/18903	0.00018177	0.00323499	0.00265412	GSTO1/TXN/S100A9/HP/MGST1/TXNDC17/PRDX1/ALOX5AP/PRDX5/MTARC1/FBLN5/GSTM3/PRDX4/CLIC2/PINK1/TXNRD3/ABCB6/GCH1/GPX1/MPO/MIR21/PRKN/HBM/ABCG2/PRDX2/PTGES/HBD/ALB/H19/HBB/LPO/APOE/HBQ1/HBG1/HBG2	35
BP	GO:0000075	cell cycle checkpoint signaling	48/2932	186/18903	0.00018688	0.00331645	0.00272096	FBXO6/MAD2L1BP/ATM/MAPK14/MAD2L2/MAP3K20/CDKN1A/E2F1/CDC6/MUC1/BIRC5/CDC45/PML/DUSP1/SPC25/CDK1/AURKB/USP44/CDC20/CLSPN/GTSE1/TTK/PBK/BUB1/PLK1/SPC24/DTL/CDK5RAP2/H2AX/ZWINT/BUB1B/CDT1/NUF2/CCNB1/CHMP4C/TICRR/PLK3/TRIP13/NBN/RAD51/CHEK1/CDCA8/HASPIN/ORC1/NDC80/TREX1/RPA4/CENPF	48
BP	GO:0045916	negative regulation of complement activation	8/2932	13/18903	0.000204727	0.00362286	0.00297234	CD59/CR2/CD55/VSIG4/CR1/SUSD4/SERPING1/CR1L	8
BP	GO:0001959	regulation of cytokine-mediated signaling pathway	44/2932	167/18903	0.000206432	0.00363533	0.00298257	PPARG/TXK/CASP1/CASP4/CARD16/NOL3/GAS6/NAIP/AGPAT2/FADD/ARG1/IRF7/PYCARD/IL1RN/PARP9/IL1R2/IRAK3/SPHK1/SOCS1/OAS1/TNFRSF1A/ANGPT1/RABGEF1/ZBP1/HSPA1B/ISG15/HSPA1A/PADI2/TRIM6/NR1H3/USP18/MIR21/IL1R1/H2BC11/PRKN/ECM1/OAS3/CAV1/SHARPIN/IRAK2/NLRP6/TREX1/ROBO1/CD24	44
BP	GO:0048145	regulation of fibroblast proliferation	27/2932	87/18903	0.000206599	0.00363533	0.00298257	KMT2A/S100A6/IFI30/NLRC3/GAS6/NUPR1/CDKN1A/CD300A/SPHK1/E2F1/CDC6/BMI1/FTH1/DACH1/PML/PARP10/PDGFD/NDUFS4/CCNB1/CD248/CAV1/AQP1/CCNA2/SFRP1/LIF/IGF1/PDGFC	27
BP	GO:0046660	female sex differentiation	35/2932	124/18903	0.000216007	0.00377315	0.00309565	PLEKHA1/IDH1/ATM/NUPR1/BCL2/RETN/CYP19A1/CEBPB/IMMP2L/TNFAIP6/ARRB2/LHFPL2/BAK1/ANG/DACH1/KIT/RBP4/PTX3/MERTK/FOXC1/ADAMTS1/MMP14/FZD4/INHBA/MMP2/CSMD1/LHX1/UBB/PCYT1B/COL9A3/SFRP1/INHBB/DMC1/PTPRN/BCL2L1	35
BP	GO:0072676	lymphocyte migration	35/2932	124/18903	0.000216007	0.00377315	0.00309565	CCR6/CKLF/GATA3/GBA1/HSD3B7/GCSAM/GAS6/AIF1/EXT1/FADD/FUT7/PYCARD/GPR183/ICAM1/SELENOK/CXCL16/CD200R1/CCL24/PADI2/CXCL10/ADAM8/CCR7/ECM1/CCL8/DEFA1B/CCL2/CCL25/CXCL11/DEFA1/CXCL12/CCL7/CCL23/CCL18/APOD/CCL20	35
BP	GO:0060333	interferon-gamma-mediated signaling pathway	12/2932	26/18903	0.000216249	0.00377315	0.00309565	PPARG/TXK/NMI/IFNGR2/ARG1/IFNGR1/HCK/PARP9/SOCS1/IRF1/JAK2/NR1H3	12
BP	GO:0045123	cellular extravasation	24/2932	74/18903	0.000217235	0.00377977	0.00310108	BST1/CD177/CCL28/ST3GAL4/SELL/EXT1/FADD/FUT7/TRIM55/ICAM1/SELPLG/PDGFD/MDK/ADAM8/SIRPA/SELP/IL1R1/ELANE/PRTN3/CCL2/CCL25/LYVE1/CXCL12/AZU1	24
BP	GO:0042773	ATP synthesis coupled electron transport	30/2932	101/18903	0.000225447	0.00390085	0.00320042	NDUFB3/NDUFAF1/COX6A1/COX7A2/COX5B/NDUFA1/NDUFA2/CHCHD2/NDUFB6/NDUFB1/NDUFC2-KCTD14/COX6B1/UQCR11/UQCR10/NDUFA4/COX7B/UQCRQ/NDUFS5/UQCRH/COX8A/UQCRHL/CDK1/NDUFS4/NDUFA7/PINK1/UQCRB/NDUFB7/CCNB1/COX6C/SNCA	30
BP	GO:0042775	mitochondrial ATP synthesis coupled electron transport	30/2932	101/18903	0.000225447	0.00390085	0.00320042	NDUFB3/NDUFAF1/COX6A1/COX7A2/COX5B/NDUFA1/NDUFA2/CHCHD2/NDUFB6/NDUFB1/NDUFC2-KCTD14/COX6B1/UQCR11/UQCR10/NDUFA4/COX7B/UQCRQ/NDUFS5/UQCRH/COX8A/UQCRHL/CDK1/NDUFS4/NDUFA7/PINK1/UQCRB/NDUFB7/CCNB1/COX6C/SNCA	30
BP	GO:0046634	regulation of alpha-beta T cell activation	33/2932	115/18903	0.000230835	0.00397202	0.00325881	GATA3/LILRB4/BATF/ANXA1/IL18/IL27/JAK3/CD28/JUNB/CD55/ZBTB7B/CD300A/IL4R/BCL6/CD274/HLA-A/SOCS1/VSIR/PNP/ZC3H12A/LILRB1/TARM1/LGALS9/RARA/IRF1/JAK2/CLEC4G/HLX/MIR21/ADORA2A/IL23R/EBI3/GLI3	33
BP	GO:1990748	cellular detoxification	33/2932	115/18903	0.000230835	0.00397202	0.00325881	GSTO1/TXN/S100A9/HP/MGST1/TXNDC17/PRDX1/ALOX5AP/PRDX5/MTARC1/FBLN5/GSTM3/PRDX4/CLIC2/TXNRD3/ABCB6/GCH1/GPX1/MPO/MIR21/HBM/ABCG2/PRDX2/PTGES/HBD/ALB/H19/HBB/LPO/APOE/HBQ1/HBG1/HBG2	33
BP	GO:0030574	collagen catabolic process	17/2932	45/18903	0.000232353	0.00397618	0.00326222	CTSL/CTSB/MMP9/MMP8/FURIN/VSIR/MMP27/ADAMTS3/FAP/MMP25/MMP28/ADAMTS2/MMP14/MMP2/MMP1/PRTN3/ADAMTS14	17
BP	GO:0046636	negative regulation of alpha-beta T cell activation	17/2932	45/18903	0.000232353	0.00397618	0.00326222	ANXA1/JAK3/ZBTB7B/CD300A/IL4R/BCL6/CD274/SOCS1/VSIR/ZC3H12A/LILRB1/TARM1/LGALS9/CLEC4G/HLX/ADORA2A/GLI3	17
BP	GO:0032722	positive regulation of chemokine production	23/2932	70/18903	0.000235033	0.00401101	0.0032908	MYD88/IL18/FFAR3/AIF1/FFAR2/PYCARD/IL4R/IL17RA/OAS1/TRPV4/TLR2/SELENOK/LGALS9/IL1B/HMOX1/EIF2AK2/NOD2/TLR4/OAS3/AZU1/IL1RL1/IL33/ALOX15B	23
BP	GO:0042102	positive regulation of T cell proliferation	31/2932	106/18903	0.000243209	0.00412863	0.0033873	CD40LG/ANXA1/IL18/JAK3/CD28/AIF1/FADD/TNFSF13B/CD55/PYCARD/PDCD1LG2/CD274/HLA-A/IGFBP2/BMI1/PNP/SELENOK/LGALS9/IL1B/JAK2/TNFRSF13C/MIR21/IL23R/SPTA1/EBI3/CD276/CD24/IL1A/IGF2/IGF1/IL21	31
BP	GO:0019722	calcium-mediated signaling	52/2932	208/18903	0.00024325	0.00412863	0.0033873	RCAN3/GSTO1/DYRK2/CCR6/BST1/NFATC2/CXCR5/TRPM2/CCR4/FKBP1B/PLCG1/CCRL2/LAT2/TMEM38A/HOMER3/MCTP1/NCALD/CAMKK2/SPHK1/MCTP2/EDNRB/PLEK/CCR1/PLCE1/PTGFR/SELENOK/ACKR3/ERBB3/MCOLN1/FHL2/CLIC2/ADGRB2/GBP1/CXCR1/CCR7/AKAP5/SLC8A2/FIS1/FPR2/DEFB1/SELP/SGCD/CD22/SAMD14/CCR8/XCR1/BHLHA15/POMC/AZU1/RYR2/IGF1/CCL20	52
BP	GO:0002437	inflammatory response to antigenic stimulus	25/2932	79/18903	0.000249709	0.00421529	0.00345839	FCGR1A/RASGRP1/HMGB2/IL10/GATA3/PLCG1/MAPK14/FGR/CD28/EXT1/RHBDF2/FUT7/HCK/IL1RN/FURIN/FCGR2B/CCR7/NOD2/GPX1/ELANE/IGHG1/GPR17/NLRP6/TREX1/IL5RA	25
BP	GO:0002720	positive regulation of cytokine production involved in immune response	25/2932	79/18903	0.000249709	0.00421529	0.00345839	MYD88/GATA3/B2M/IL18/FFAR3/FFAR2/CD55/PYCARD/IL18R1/HLA-A/ARID5A/LILRB1/IL1B/KIT/SLC7A5/TRIM6/NOD2/RSAD2/TLR4/IL1R1/KIR2DL4/GPRC5B/INAVA/RIGI/HLA-G	25
BP	GO:0034312	diol biosynthetic process	11/2932	23/18903	0.000269278	0.00453334	0.00371934	GBA1/ACER3/SPHK1/SPTLC2/ASAH2/ASAH2B/PCBD1/SPR/SPTLC3/GCH1/SPTSSB	11
BP	GO:0051304	chromosome separation	37/2932	135/18903	0.000276557	0.00463697	0.00380436	PLSCR1/SMARCD3/MAD2L1BP/ATM/MAD2L2/UBE2C/SHOC1/CDC6/DLGAP5/NCAPH2/BIRC5/DUSP1/SPC25/AURKB/USP44/CDC20/TTK/PTTG1/TOP2A/BUB1/PLK1/SPC24/ESPL1/CDK5RAP2/NCAPG/ZWINT/BUB1B/CDT1/NUF2/CCNB1/TRIP13/CENPE/CDCA8/HASPIN/NDC80/NCAPH/CENPF	37
BP	GO:0010950	positive regulation of endopeptidase activity	45/2932	174/18903	0.000276923	0.00463697	0.00380436	EPHA4/S100A9/S100A8/AIM2/NLRC4/PPARG/PRELID1/CASP1/GPER1/CTSH/CTSD/TNFSF10/FADD/ACVR1C/PSENEN/PYCARD/IFI16/BAK1/CR1/NKX3-1/P2RX1/VSIR/NDUFA13/BAD/PML/NLRP12/ST20/LGALS9/DLC1/ASPH/PSME2/CCN2/JAK2/GSN/FIS1/HSPE1/MIR21/FAS/COL4A3/F3/HIP1/NLRP6/SOX7/SNCA/ROBO1	45
BP	GO:2000106	regulation of leukocyte apoptotic process	28/2932	93/18903	0.000280544	0.004685	0.00384377	BCL11B/IL7R/IL10/ZC3H8/PRELID1/ANXA1/GAS6/JAK3/CD3G/BCL2/FADD/IRF7/BCL6/CD274/BCL3/LILRB1/AURKB/LGALS9/MERTK/ADAM8/HCAR2/CCR7/NOD2/LGALS3/IDO1/CXCL12/PTCRA/BCL2L1	28
BP	GO:0001706	endoderm formation	20/2932	58/18903	0.000285823	0.00474801	0.00389546	NOG/ITGA7/MMP9/MMP8/COL5A1/DUSP1/LAMB3/EOMES/COL6A1/MMP14/INHBA/MMP2/LHX1/POU5F1/COL7A1/SOX7/GATA6/MIXL1/MESP1/COL4A2	20
BP	GO:0010639	negative regulation of organelle organization	82/2932	366/18903	0.000285841	0.00474801	0.00389546	TBC1D4/PPARG/PRELID1/CAPG/GMFG/KIF24/SPTBN1/NOL3/MAD2L1BP/ATM/NUPR1/PHLDB2/STYXL1/MAD2L2/TSPO/PRKCD/CAPZA1/KANK1/C11orf65/ARRB2/TMEM67/LIMK2/CLU/H3-3B/AURKAIP1/H3-3A/BAK1/FGF13/TMSB10/SHANK1/BIRC5/CAPZA2/DUSP1/SPC25/AURKB/USP44/CDC20/DLC1/TWF2/HSPA1A/TTK/PTTG1/HGF/TOP2A/PINK1/GSN/CAMSAP2/TPX2/BUB1/PLK1/SPC24/ESPL1/CDK5RAP2/GPX1/CORO2B/MIR21/ZWINT/PRKN/BUB1B/CDT1/NUF2/CCNB1/SPTA1/FBXO43/TRIP13/FKB…	82
BP	GO:0032480	negative regulation of type I interferon production	14/2932	34/18903	0.00028824	0.00477513	0.00391771	UFD1/IL10/RNF125/NMI/NLRC3/PYCARD/PTPRS/LILRB1/RELB/ACOD1/SIRPA/MIR21/LILRA4/DHX58	14
BP	GO:0045089	positive regulation of innate immune response	39/2932	145/18903	0.00029281	0.00483797	0.00396927	RASGRP1/AIM2/HMGB2/NLRC4/TXK/PLSCR1/NMI/FADD/TYROBP/NECTIN2/IFI35/FCN1/PAK3/FFAR2/HCK/IRF7/PYCARD/SPI1/VAV1/PARP9/CGAS/IFI16/KLRC4/CLEC6A/HSP90AA1/ZBP1/FCN2/LILRA2/TRIM6/ADAM8/FPR2/NOD2/TLR4/RIOK3/KIR2DL4/GBP5/HLA-G/LAG3/IL21	39
BP	GO:2000379	positive regulation of reactive oxygen species metabolic process	23/2932	71/18903	0.000297212	0.00489771	0.00401828	CD177/GADD45A/ITGAM/MAPK14/TYROBP/TSPO/PRKCD/MMP8/CYBA/CDKN1A/ROMO1/ACE2/ZC3H12A/ACOD1/TGFB1/FPR2/CYP1B1/TLR4/PID1/AKR1C1/THBS1/SNCA/H19	23
BP	GO:0050920	regulation of chemotaxis	56/2932	230/18903	0.000298475	0.00490554	0.0040247	CCR6/BST1/DUSP3/C3AR1/CCR4/GAS6/DPP4/SEMA5A/AIF1/CYP19A1/SEMA6B/MTUS1/SEMA4A/TNFAIP6/SPI1/GPR183/RAC2/TRPV4/CCR1/GPSM3/DUSP1/SUCNR1/PDGFD/LGALS9/MIR223/CCN3/MPP1/MMP28/MDK/PADI2/TGFB1/RIN3/MAPK3/CXCL10/CXCL17/DDT/CCR7/SEMA3B/HSPB1/FPR2/NOD2/PGF/PLXNA4/SLAMF8/F3/ELANE/CCL2/THBS1/CXCL12/AZU1/TUBB2B/NTRK3/ROBO1/CCL7/MET/SEMA3A	56
BP	GO:0002709	regulation of T cell mediated immunity	27/2932	89/18903	0.000312099	0.00511415	0.00419586	IL7R/GATA3/LILRB4/B2M/IL18/CEACAM1/FADD/NECTIN2/ARG1/FUT7/CD55/IL18R1/HLA-A/ARID5A/LILRB1/HLA-H/IL1B/FCGR2B/CD1C/CLEC4G/CD1E/NOD2/RSAD2/IL1R1/IL23R/SLC22A13/HLA-G	27
BP	GO:0050673	epithelial cell proliferation	103/2932	481/18903	0.00031281	0.00511415	0.00419586	BCL11B/NOG/AKT3/HMGB2/IL10/PTCH1/PPARG/GATA3/SERPINB1/PTPRK/SYNJ2BP/NLRC3/B2M/PLCG1/NUPR1/SEMA5A/CEACAM1/ACVRL1/LRG1/GRN/CEBPB/NR1D1/ARG1/CYBA/ALOX5/ST8SIA1/HPN/STXBP4/FGF9/STK3/BAK1/ZFP36/WNT7A/NKX3-1/EDNRB/PDCD10/NME1/DBH/EAF2/EHF/TGFBR3/BAD/ANG/DACH1/BMPR1A/PROK2/AREG/CCN3/FAP/KIT/POLD4/HMOX1/PRL/MYDGF/HGF/RAP1GAP/ALDH1A2/IGFBP3/CCL24/MDK/TGFA/IQGAP3/TGFB1/EGFL7/FLT4/FUT2/HLX/NOD2/PGF/GPX1/OVO…	103
BP	GO:0035455	response to interferon-alpha	10/2932	20/18903	0.000326378	0.00532057	0.00436521	IFITM1/GATA3/GAS6/IFITM3/BST2/IFITM2/IFIT3/EIF2AK2/LAMP3/IFIT2	10
BP	GO:0071887	leukocyte apoptotic process	33/2932	117/18903	0.000327144	0.00532057	0.00436521	BCL11B/IL7R/IL10/ZC3H8/PRELID1/ANXA1/GAS6/JAK3/CD3G/BCL2/CTSL/FADD/IRF7/BCL6/PLEKHO2/CD274/BAK1/BCL3/LILRB1/AURKB/LGALS9/MERTK/ADAM8/HCAR2/CCR7/NOD2/LGALS3/IDO1/FAS/CXCL12/PTCRA/GLI3/BCL2L1	33
BP	GO:0046328	regulation of JNK cascade	38/2932	141/18903	0.000332958	0.00539881	0.00442941	RASGRP1/MYD88/EDAR/TRAF5/DUSP3/GADD45B/TNIK/GADD45A/FKTN/ZMYND11/NAIP/DNAJA1/MMP8/LTBR/PYCARD/STK3/MDFIC/WNT7A/GADD45G/TRPV4/NCF1/IL1B/FCGR2B/CCN2/PINK1/FLT4/MAP3K11/SIRPA/CCR7/NOD2/DACT1/TLR4/PRKN/KLHL31/SFRP1/PER1/SEMA3A/IL1A	38
BP	GO:0032740	positive regulation of interleukin-17 production	12/2932	27/18903	0.000334555	0.00539881	0.00442941	MYD88/IL18/OSM/ZBTB7B/SPHK1/ARID5A/SLC7A5/TGFB1/JAK2/NOD2/IL23R/IL21	12
BP	GO:0070269	pyroptosis	12/2932	27/18903	0.000334555	0.00539881	0.00442941	AIM2/NLRC4/CASP1/CASP4/NAIP/PYCARD/GSDMD/ZBP1/MIR223/ELANE/NLRP6/GSDMC	12
BP	GO:0022904	respiratory electron transport chain	34/2932	122/18903	0.000342309	0.00550967	0.00452036	NDUFB3/SLC25A18/NDUFAF1/GBA1/COX6A1/COX7A2/COX5B/NDUFA1/NDUFA2/CHCHD2/NDUFB6/NDUFB1/NDUFC2-KCTD14/COX6B1/UQCR11/UQCR10/NDUFA4/IMMP2L/COX7B/UQCRQ/SCO2/NDUFS5/UQCRH/COX8A/UQCRHL/CDK1/NDUFS4/NDUFA7/PINK1/UQCRB/NDUFB7/CCNB1/COX6C/SNCA	34
BP	GO:0032481	positive regulation of type I interferon production	21/2932	63/18903	0.000346381	0.00553233	0.00453895	GAPDH/MYD88/HMGB2/RNF135/FLOT1/CD14/IRF7/CGAS/OAS1/TLR2/HSP90AA1/ISG15/IRF1/TLR4/RIOK3/OAS3/DHX58/OAS2/IFIH1/RIGI/TRIM15	21
BP	GO:0032615	interleukin-12 production	21/2932	63/18903	0.000346381	0.00553233	0.00453895	LILRA5/IL10/CD40LG/MAPK14/JAK3/ARRB2/IRAK3/TLR2/LILRB1/LGALS9/MDK/IRF1/CCR7/NOD2/TLR4/MIR21/IDO1/IL23R/ACP5/THBS1/HLA-G	21
BP	GO:0032655	regulation of interleukin-12 production	21/2932	63/18903	0.000346381	0.00553233	0.00453895	LILRA5/IL10/CD40LG/MAPK14/JAK3/ARRB2/IRAK3/TLR2/LILRB1/LGALS9/MDK/IRF1/CCR7/NOD2/TLR4/MIR21/IDO1/IL23R/ACP5/THBS1/HLA-G	21
BP	GO:0002921	negative regulation of humoral immune response	9/2932	17/18903	0.000379602	0.00604741	0.00496155	CD59/CR2/CD55/VSIG4/CR1/SUSD4/SERPING1/CR1L/FCGR2B	9
BP	GO:0006751	glutathione catabolic process	7/2932	11/18903	0.000396734	0.00630423	0.00517225	GGT1/GGTLC2/GGT2P/GGT3P/CHAC1/GGT5/DPEP1	7
BP	GO:0036151	phosphatidylcholine acyl-chain remodeling	8/2932	14/18903	0.00041266	0.00651612	0.00534609	DBI/PLA2G4A/PLB1/MBOAT2/NR1H3/MBOAT7/LPCAT2/TMEM86B	8
BP	GO:0070942	neutrophil mediated cytotoxicity	8/2932	14/18903	0.00041266	0.00651612	0.00534609	MYD88/ARG1/DNASE1L3/CTSG/ELANE/NLRP6/AZU1/SCNN1B	8
BP	GO:0045638	negative regulation of myeloid cell differentiation	28/2932	95/18903	0.000413207	0.00651612	0.00534609	C1QC/LILRB4/H4C8/H4C4/ZBTB46/CEACAM1/TNFAIP6/LILRB3/FSTL3/TRIB1/HMGB3/ZFP36/H4C11/H4C12/H4C5/LILRB1/GPR137/LTF/RARA/NFKBIA/TLR4/PF4/INHBA/H4C9/H4C3/SFRP1/CLDN18/FBN1	28
BP	GO:0046545	development of primary female sexual characteristics	31/2932	109/18903	0.00041735	0.00656483	0.00538606	PLEKHA1/IDH1/ATM/NUPR1/BCL2/RETN/CYP19A1/CEBPB/IMMP2L/TNFAIP6/ARRB2/LHFPL2/ANG/DACH1/KIT/PTX3/FOXC1/ADAMTS1/MMP14/FZD4/INHBA/MMP2/CSMD1/UBB/PCYT1B/COL9A3/SFRP1/INHBB/DMC1/PTPRN/BCL2L1	31
BP	GO:0022412	cellular process involved in reproduction in multicellular organism	93/2932	430/18903	0.000421947	0.00659632	0.00541189	SLC26A8/PAQR8/CCR6/HMGB2/PTCH1/CFAP44/SPEF2/ATM/NECTIN3/BCL2/RETN/TTC12/NECTIN2/FOSL1/INSL3/ROPN1L/HOOK1/SRPK1/CCDC136/TNFAIP6/ARRB2/SLC26A6/TDRD9/MYBL1/H3-3B/SEPTIN4/UBE2J1/H3-3A/FOLR3/AGFG1/NPR2/CCNA1/NCAPH2/SYCP3/ARMC12/CCNB2/ANG/SPACDR/TDRD7/TDRD12/STRBP/PIWIL2/KIT/TMEM119/RARA/TTK/DPY19L2P2/PTX3/CFAP97D1/TOP2A/PIWIL4/UCHL1/MDK/PRDX4/FOXC1/PLK1/ACRBP/AURKA/DEFB1/ZMYND15/SLC22A14/SPAG16/DPY19L…	93
BP	GO:0002534	cytokine production involved in inflammatory response	24/2932	77/18903	0.000423588	0.00659632	0.00541189	MYD88/LILRB4/NLRC3/MAPK14/ALOX5/ABCD2/PYCARD/IL1R2/IL17RA/ABCD1/ZC3H12A/GPSM3/SIRPA/NOD2/TLR4/MIR21/PLD4/NLRP7/GBP5/EPHB2/PER1/MACIR/H19/APOD	24
BP	GO:0032729	positive regulation of interferon-gamma production	24/2932	77/18903	0.000423588	0.00659632	0.00541189	RASGRP1/TXK/IL18/IL27/FADD/CD14/PYCARD/IL18R1/SLC11A1/BCL3/HLA-A/ARID5A/LILRB1/ISG15/LGALS9/IL1B/SLC7A5/JAK2/TLR4/IL1R1/IL23R/EBI3/CD276/IL21	24
BP	GO:1900015	regulation of cytokine production involved in inflammatory response	24/2932	77/18903	0.000423588	0.00659632	0.00541189	MYD88/LILRB4/NLRC3/MAPK14/ALOX5/ABCD2/PYCARD/IL1R2/IL17RA/ABCD1/ZC3H12A/GPSM3/SIRPA/NOD2/TLR4/MIR21/PLD4/NLRP7/GBP5/EPHB2/PER1/MACIR/H19/APOD	24
BP	GO:0060143	positive regulation of syncytium formation by plasma membrane fusion	11/2932	24/18903	0.000427731	0.00664423	0.0054512	NFATC2/FLOT1/CD53/MAPK14/TYROBP/IL4R/ADAM9/EHD1/GDF15/RAPGEF3/CXCL9	11
BP	GO:0002702	positive regulation of production of molecular mediator of immune response	36/2932	133/18903	0.000430422	0.0066694	0.00547185	MYD88/IL10/GATA3/B2M/IL18/MAD2L2/CD28/FFAR3/TNFSF13/FFAR2/CD55/PYCARD/IL18R1/IL4R/HLA-A/ARID5A/LILRB1/IL1B/KIT/SLC7A5/RBP4/TGFB1/TRIM6/NOD2/RSAD2/TLR4/IL1R1/KIR2DL4/GPRC5B/INAVA/MZB1/RIGI/HLA-G/EPHB2/IL33/IL21	36
BP	GO:0030004	cellular monovalent inorganic cation homeostasis	32/2932	114/18903	0.000438564	0.00677869	0.00556152	ATP6V0E1/MAFG/ATP6V1D/RAB20/SLC1A3/BCL2/GRN/ATP6V0D1/SLC26A6/SLC4A7/SLC9A8/SLC4A10/SLC11A1/ATP6V1F/ATP6V0B/RNASEK/SLC9A4/TCIRG1/SLC4A4/KCNMA1/TMEM165/MAPK3/ATP6V0C/ATP1B2/SLAMF8/KCNJ2/SLC4A3/SLC4A9/SLC4A1/CA2/IL1A/SCNN1B	32
BP	GO:0043491	protein kinase B signaling	53/2932	218/18903	0.000442829	0.00681797	0.00559374	TXN/PLEKHA1/PIK3C2B/GATA3/THEM4/IL18/GAS6/ILK/OSM/TNFAIP8L3/GPER1/SEMA5A/CD28/ARRB2/STK3/TSPYL5/HYAL2/NKX3-1/CAVIN3/RRAS/ANGPT1/HSP90AA1/GDF15/IL1B/CASS4/MYDGF/TGFB1/PINK1/MERTK/ADAM8/FAM110C/MIR451A/CCR7/GPX1/MIR21/PHLDA3/PLK3/GRM2/F3/SFRP5/HIP1/CCL2/THBS1/EGF/HLA-G/NTRK3/EPHA2/IL26/MET/IGF2/IGF1/H19/MEIS3	53
BP	GO:0098869	cellular oxidant detoxification	29/2932	100/18903	0.000443294	0.00681797	0.00559374	GSTO1/TXN/S100A9/HP/MGST1/TXNDC17/PRDX1/ALOX5AP/PRDX5/FBLN5/PRDX4/CLIC2/TXNRD3/GCH1/GPX1/MPO/MIR21/HBM/PRDX2/PTGES/HBD/ALB/H19/HBB/LPO/APOE/HBQ1/HBG1/HBG2	29
BP	GO:2001056	positive regulation of cysteine-type endopeptidase activity	38/2932	143/18903	0.000450291	0.00690853	0.00566804	S100A9/S100A8/AIM2/NLRC4/PPARG/CASP1/GPER1/CTSH/CTSD/TNFSF10/FADD/ACVR1C/PYCARD/IFI16/BAK1/NKX3-1/P2RX1/NDUFA13/BAD/PML/NLRP12/ST20/LGALS9/DLC1/ASPH/CCN2/JAK2/GSN/FIS1/HSPE1/FAS/COL4A3/F3/HIP1/NLRP6/SOX7/SNCA/ROBO1	38
BP	GO:0018212	peptidyl-tyrosine modification	84/2932	382/18903	0.000455392	0.00696962	0.00571816	EPHA4/FCGR1A/DYRK2/LILRA5/BST1/TXK/VPS25/LILRB4/ABI2/IL18/SOCS3/GAS6/ITK/OSM/TPST2/BMX/STK16/JAK3/MAP2K6/SAMSN1/FGR/FES/PRKCD/RPS6KA5/ARRB2/MVP/HCK/PARP9/CD300A/CAMKK2/HYAL2/SOCS1/IL24/DOCK3/CLEC6A/TNFRSF1A/ANGPT1/LTK/ERBB3/PDGFD/AREG/NCF1/MAP2K3/KIT/EPHA1/CASS4/TTK/HGF/TGFA/PBK/TGFB1/EIF2AK2/MAPK3/JAK2/FLT4/MELK/MERTK/NOD2/IL22RA2/DYRK3/IL23R/GPRC5B/FGFR2/TPST1/CAV1/PLPP3/FLT3/AATK/EFNA5/SFRP1/E…	84
BP	GO:1905517	macrophage migration	20/2932	60/18903	0.00047506	0.00725281	0.0059505	CKLF/C3AR1/CYP19A1/MTUS1/TRIM55/EDNRB/TRPV4/CD200R1/MMP28/MDK/MAPK3/CXCL17/DDT/MMP14/LGALS3/SLAMF8/MMP2/CCL2/THBS1/AZU1	20
BP	GO:0050922	negative regulation of chemotaxis	22/2932	69/18903	0.000510975	0.00778206	0.00638472	DUSP3/DPP4/SEMA5A/AIF1/CYP19A1/SEMA6B/SEMA4A/TNFAIP6/DUSP1/MIR223/CCN3/MMP28/PADI2/RIN3/DDT/SEMA3B/SLAMF8/ELANE/CCL2/THBS1/ROBO1/SEMA3A	22
BP	GO:2000377	regulation of reactive oxygen species metabolic process	39/2932	149/18903	0.000528817	0.00803415	0.00659154	HP/FOXO1/BST1/CD177/GADD45A/ITGAM/MAPK14/BCL2/TYROBP/TSPO/PRKCD/MMP8/CYBA/ALOX5/ABCD2/CDKN1A/RAC2/FBLN5/ABCD1/ROMO1/ACE2/ZC3H12A/PLIN5/ACOD1/TGFB1/PINK1/FPR2/CYP1B1/GCH1/TLR4/PID1/MIR21/PRKN/AKR1C1/ACP5/THBS1/PRDX2/SNCA/H19	39
BP	GO:0019370	leukotriene biosynthetic process	10/2932	21/18903	0.000536761	0.00803722	0.00659407	ALOX5AP/ALOX5/PLA2G4A/LTA4H/GGT1/GGTLC2/GGT2P/GGT3P/PRG3/GGT5	10
BP	GO:0045063	T-helper 1 cell differentiation	10/2932	21/18903	0.000536761	0.00803722	0.00659407	LEF1/ANXA1/IL27/JAK3/SEMA4A/IL18R1/IL4R/RELB/HLX/TMEM98	10
BP	GO:0090201	negative regulation of release of cytochrome c from mitochondria	10/2932	21/18903	0.000536761	0.00803722	0.00659407	PRELID1/NOL3/ARRB2/CLU/BAK1/HGF/GPX1/PRKN/BCL2L1/IGF1	10
BP	GO:0090231	regulation of spindle checkpoint	10/2932	21/18903	0.000536761	0.00803722	0.00659407	MAD2L1BP/BIRC5/DUSP1/AURKB/USP44/CDK5RAP2/CDT1/CCNB1/CDCA8/NDC80	10
BP	GO:0090266	regulation of mitotic cell cycle spindle assembly checkpoint	10/2932	21/18903	0.000536761	0.00803722	0.00659407	MAD2L1BP/BIRC5/DUSP1/AURKB/USP44/CDK5RAP2/CDT1/CCNB1/CDCA8/NDC80	10
BP	GO:1903504	regulation of mitotic spindle checkpoint	10/2932	21/18903	0.000536761	0.00803722	0.00659407	MAD2L1BP/BIRC5/DUSP1/AURKB/USP44/CDK5RAP2/CDT1/CCNB1/CDCA8/NDC80	10
BP	GO:0051897	positive regulation of protein kinase B signaling	33/2932	120/18903	0.000538678	0.00804659	0.00660175	TXN/GATA3/IL18/GAS6/OSM/TNFAIP8L3/SEMA5A/CD28/ARRB2/STK3/TSPYL5/ANGPT1/HSP90AA1/GDF15/CASS4/MYDGF/TGFB1/PINK1/ADAM8/FAM110C/CCR7/GPX1/MIR21/F3/HIP1/THBS1/EGF/IL26/MET/IGF2/IGF1/H19/MEIS3	33
BP	GO:0034311	diol metabolic process	13/2932	32/18903	0.000552769	0.00823731	0.00675823	GBA1/ACER3/SPHK1/SPTLC2/PRKG2/ASAH2/ASAH2B/PCBD1/SPR/SPTLC3/GCH1/PLPP3/SPTSSB	13
BP	GO:0045581	negative regulation of T cell differentiation	17/2932	48/18903	0.000562483	0.00836207	0.00686059	ZC3H8/LILRB4/ANXA1/JAK3/ZBTB7B/IL4R/BCL6/SOCS1/ZC3H12A/MDK/IRF1/CLEC4G/HLX/MIR21/PRDX2/GLI3/LAG3	17
BP	GO:0032732	positive regulation of interleukin-1 production	23/2932	74/18903	0.000578398	0.00857819	0.0070379	LILRA5/AIM2/MYD88/NLRC4/CASP1/NAIP/TYROBP/PYCARD/IFI16/ORM1/GSDMD/NLRP12/ORM2/LGALS9/LILRA2/JAK2/HSPB1/NOD2/TLR4/GBP5/INAVA/IGHD/AZU1	23
BP	GO:2001235	positive regulation of apoptotic signaling pathway	36/2932	135/18903	0.000584057	0.00864155	0.00708988	S100A9/S100A8/NUPR1/GPER1/STYXL1/VNN1/CTSH/G0S2/TNFSF10/FADD/PRKCD/LTBR/PYCARD/SEPTIN4/STK3/RBCK1/HYAL2/NKX3-1/BAD/PML/ATF3/IL19/DEDD2/TNFRSF12A/JAK2/FIS1/ADORA2A/INHBA/FAS/CAV1/UBB/THBS1/SFRP1/INHBB/TIMP3/ITM2C	36
BP	GO:0002705	positive regulation of leukocyte mediated immunity	37/2932	140/18903	0.000594588	0.00877652	0.00720061	FCGR1A/RASGRP1/CD177/GATA3/B2M/IL18/ITGAM/MAD2L2/CD28/FADD/TYROBP/NECTIN2/TNFSF13/ARG1/CD55/SPI1/VAV1/IL18R1/KLRC4/HLA-A/ARID5A/HLA-H/IL1B/KIT/TGFB1/CD1C/CD1E/NOD2/RSAD2/IL1R1/KIR2DL4/IL23R/SLC22A13/RIGI/HLA-G/LAG3/IL21	37
BP	GO:0006575	cellular modified amino acid metabolic process	45/2932	180/18903	0.000613442	0.00903341	0.00741138	GSTO1/SLC16A10/GCNT4/CKMT2/GATA3/PLSCR1/ABHD16A/IDH1/SLC22A4/MTHFD2/VNN1/CTSB/OPLAH/POR/MTHFS/SERINC2/HPN/GGT1/GGH/GGTLC2/VNN2/ABHD12B/GGT2P/MBOAT2/ALDH4A1/ETHE1/GGT3P/GSTM3/SARDH/TG/GCH1/GPX1/PLOD2/SULT1B1/CRYM/CHAC1/ASS1/ALDH1L2/TYMS/OSBPL10/GGT5/SLC1A2/NAT8/PLA1A/DPEP1	45
BP	GO:0031960	response to corticosteroid	42/2932	165/18903	0.000618105	0.00908061	0.0074501	ANXA3/IL10/ADM/GBA1/AXIN2/ANXA1/GPER1/FBXO32/BCL2/BCKDHB/AIF1/FOSL1/ARG1/CYBA/POR/IL1RN/ALPL/ADAM9/ZFP36/IGFBP2/BMI1/BAD/AANAT/AREG/MAOB/MDK/CCN2/JAK2/APOA2/CYP1B1/SDC1/NEFL/ASS1/AQP1/FLT3/TYMS/CPS1/NTRK3/COL1A1/PTPRU/FAM107A/SCNN1B	42
BP	GO:0032370	positive regulation of lipid transport	26/2932	88/18903	0.000627158	0.00919193	0.00754143	PTCH1/PPARG/PRELID1/DBI/RETN/MAP2K6/PLTP/CYP19A1/PRKCD/ACSL1/PLA2G4A/ATP8A2/NTSR1/NKX3-1/CETP/ERFE/CES1/IL1B/NFKBIA/NR1H3/CAV1/ABCA13/GAL/PTGES/IL1A/APOE	26
BP	GO:1903556	negative regulation of tumor necrosis factor superfamily cytokine production	24/2932	79/18903	0.000642345	0.00939241	0.00770592	IL10/LILRB4/NLRC3/GAS6/TSPO/ARRB2/IRAK3/CD274/BCL3/VSIR/BPI/ZC3H12A/ORM1/LILRB1/LGALS9/LTF/RARA/SIRPA/NOD2/TLR4/LILRA4/ACP5/POMC/IGF1	24
BP	GO:0043388	positive regulation of DNA binding	19/2932	57/18903	0.000652161	0.0095136	0.00780535	TXN/GTF2B/HMGB2/LAMTOR5/PPARG/GATA3/MMP9/MMP8/PLAUR/NIBAN2/NME1/TGFB1/JAK2/TRIM6/FOXC1/H1-0/PRKN/EGF/IGF1	19
BP	GO:0034764	positive regulation of transmembrane transport	56/2932	237/18903	0.000658234	0.00957977	0.00785964	AMIGO1/GLRX/GSTO1/TCAF1/ABCB1/PLCG1/COX17/IFNGR2/GPER1/MAPK14/KCNE1/SLC38A1/ANK3/CACNB4/NDUFA4/STAC3/ACSL1/SLC26A6/TRPC1/NTSR1/BAK1/CDK5/P2RX1/KCNE5/ACE2/ERFE/MIR223/CLTCL1/SLC7A5/PINK1/CXCL10/AKAP5/MIR21/ATP1B2/KCNJ2/MS4A1/CAV1/P2RY6/CCL2/CXCL11/GPC3/GAL/STAC/EPHB2/SLC1A2/SNCA/CA2/RYR2/GJC2/IGF1/CXCL9/ITLN1/NOS1AP/KCNH2/DRD4/TERT	56
BP	GO:1901990	regulation of mitotic cell cycle phase transition	78/2932	354/18903	0.000669125	0.00971557	0.00797105	SMARCD3/ANXA1/MAD2L1BP/ATM/BCL2/MAD2L2/CDKN2C/MIIP/CDKN2D/AIF1/LSM10/CACNB4/PKIA/UBE2C/CCND3/CDKN1A/E2F1/CDC6/MUC1/DLGAP5/BIRC5/PML/DUSP1/SPC25/RRM2/CDK1/AURKB/CDC25C/CDCA5/USP44/CDC20/ANLN/CLSPN/TFDP1/GTSE1/TTK/KIF14/PSME2/CDC25A/MIR451A/BUB1/PLK1/SPC24/DTL/ADAMTS1/ESPL1/AURKA/CDK5RAP2/DACT1/INHBA/ZWINT/BUB1B/CDT1/NUF2/CCNB1/CHMP4C/TICRR/PLK3/TRIP13/CENPE/NBN/CCL2/CHEK1/CDCA8/HASPIN/ORC1/NDC80/C…	78
BP	GO:0019646	aerobic electron transport chain	27/2932	93/18903	0.000673433	0.00975537	0.00800371	NDUFB3/NDUFAF1/COX6A1/COX7A2/COX5B/NDUFA1/NDUFA2/NDUFB6/NDUFB1/NDUFC2-KCTD14/COX6B1/UQCR11/UQCR10/NDUFA4/COX7B/UQCRQ/NDUFS5/UQCRH/COX8A/UQCRHL/NDUFS4/NDUFA7/PINK1/UQCRB/NDUFB7/COX6C/SNCA	27
BP	GO:1901342	regulation of vasculature development	78/2932	355/18903	0.000729758	0.0105468	0.00865301	ETS1/AMOT/ANXA3/AKT3/HTATIP2/IL10/ADM/PPARG/C3AR1/RECK/PGK1/SYNJ2BP/GADD45A/PLCG1/E2F2/SEMA5A/CTSH/CEACAM1/ISM1/NR2E1/ACVRL1/LRG1/GRN/SEMA4A/ALOX5/CAMP/EMILIN2/SPHK1/NIBAN2/STAB1/ADAM12/PDCD10/RRAS/ZC3H12A/PML/EPN1/MIR223/IL1B/EPHA1/HMOX1/PRL/MYDGF/HGF/CREB3L1/CCL24/MDK/GPR4/ADGRB2/SMAD1/CXCL10/FOXC1/WARS1/MIR451A/HSPB1/ADAMTS1/CYP1B1/PGF/MIR21/PF4/ADM2/ECM1/TAFA5/ID1/COL4A3/F3/AQP1/RAPGEF3/THBS1…	78
BP	GO:0007160	cell-matrix adhesion	56/2932	238/18903	0.000733159	0.0105714	0.00867322	ADAMTS12/CD63/BST1/DUSP3/CCL28/ITGA7/PTPRK/CD96/GPM6B/ITGA6/ILK/ITGAM/PHLDB2/BCL2/ACVRL1/TIAM1/FERMT3/AJAP1/ADAM9/BCL6/TRIP6/CDK5/FBLN5/ZYX/RRAS/COL17A1/DLC1/DISC1/EPHA1/ITGA2B/NEXMIF/CCN2/GFUS/CCR7/SIGLEC1/PLAU/CORO2B/EFEMP2/MMP14/COL13A1/ITGA9/CEACAM6/CCL25/LYVE1/BCAM/COL5A3/THBS1/EFNA5/SFRP1/CAMSAP3/ITGAD/ITGB8/ITGA8/FAM107A/MSLN/APOD	56
BP	GO:0048545	response to steroid hormone	75/2932	339/18903	0.000742829	0.0106861	0.00876732	NR3C2/PAQR8/ANXA3/HMGB2/IL10/ADM/GBA1/AXIN2/IDH1/ANXA1/GPER1/FBXO32/BCL2/BCKDHB/LBH/NR2E1/TADA3/AIF1/DNAJA1/FOSL1/TSPO/NR1D1/ARG1/TGFB3/CYBA/POR/IL1RN/ALPL/ADAM9/ZFP36/NKX3-1/IGFBP2/BMI1/TLR2/BAD/TFPI/HSPA1B/WBP2/AANAT/AREG/HSPA1A/MAOB/ZNF366/ACOD1/PMEPA1/MDK/PADI2/TGFB1/CCN2/JAK2/DEFA3/NR1H3/APOA2/CYP1B1/SDC1/NEFL/ASS1/CAV1/AQP1/FKBP4/DEFA1B/NEDD4/FLT3/DEFA1/TYMS/THBS1/CPS1/SFRP1/KANK2/NTRK3/COL…	75
BP	GO:0050829	defense response to Gram-negative bacterium	26/2932	89/18903	0.000757183	0.0108675	0.00891613	HMGB2/H2BC12/CAMP/PYCARD/SLC11A1/BPI/ROMO1/GSDMD/FCN2/LTF/RNASE3/DEFA3/DEFB1/SELP/TLR4/H2BC11/IL23R/CTSG/ELANE/AQP1/LYPD8/DEFA1B/DEFA4/DEFA1/AZU1/DEFA5	26
BP	GO:0002679	respiratory burst involved in defense response	8/2932	15/18903	0.000764151	0.0108922	0.00893641	CYBC1/GRN/HCK/SELENOK/NCF1/MPO/SLAMF8/PRDX2	8
BP	GO:0046512	sphingosine biosynthetic process	8/2932	15/18903	0.000764151	0.0108922	0.00893641	GBA1/ACER3/SPHK1/SPTLC2/ASAH2/ASAH2B/SPTLC3/SPTSSB	8
BP	GO:0046520	sphingoid biosynthetic process	8/2932	15/18903	0.000764151	0.0108922	0.00893641	GBA1/ACER3/SPHK1/SPTLC2/ASAH2/ASAH2B/SPTLC3/SPTSSB	8
BP	GO:0002828	regulation of type 2 immune response	13/2932	33/18903	0.000783639	0.011103	0.00910932	GATA3/ANXA1/IL18/ARG1/IL4R/BCL6/RARA/HLX/NOD2/RSAD2/IDO1/ECM1/IL33	13
BP	GO:0042219	cellular modified amino acid catabolic process	13/2932	33/18903	0.000783639	0.011103	0.00910932	ABHD16A/MTHFS/GGT1/GGTLC2/ABHD12B/GGT2P/ALDH4A1/GGT3P/SARDH/CHAC1/ALDH1L2/GGT5/DPEP1	13
BP	GO:0034101	erythrocyte homeostasis	36/2932	137/18903	0.000784283	0.011103	0.00910932	ETS1/HMGB2/GATA3/B2M/PRDX1/MAPK14/JAK3/JMJD6/SPI1/BCL6/ACVR1B/ZFP36/RHAG/TGFBR3/HSPA1B/AHSP/ISG15/KIT/HSPA1A/HMOX1/BPGM/JAK2/DYRK3/EPAS1/INHBA/ALAS2/TSPO2/KLF1/TRIM10/TAL1/SLC4A1/GATA1/FAM210B/TRIM58/EPB42/SCNN1B	36
BP	GO:0051384	response to glucocorticoid	37/2932	142/18903	0.000793375	0.0111901	0.0091808	ANXA3/IL10/ADM/GBA1/AXIN2/ANXA1/FBXO32/BCL2/BCKDHB/AIF1/FOSL1/ARG1/POR/IL1RN/ALPL/ADAM9/ZFP36/IGFBP2/BMI1/BAD/AANAT/AREG/MAOB/MDK/JAK2/APOA2/CYP1B1/SDC1/NEFL/ASS1/AQP1/FLT3/TYMS/CPS1/NTRK3/PTPRU/FAM107A	37
BP	GO:0002691	regulation of cellular extravasation	15/2932	41/18903	0.00079403	0.0111901	0.0091808	BST1/CCL28/ST3GAL4/FADD/FUT7/ICAM1/PDGFD/MDK/ADAM8/SELP/IL1R1/ELANE/CCL25/LYVE1/CXCL12	15
BP	GO:1903034	regulation of response to wounding	43/2932	172/18903	0.000799943	0.011198	0.00918728	EPHA4/IL10/ANXA1/FKBP1B/ST3GAL4/PHLDB2/CEACAM1/GRN/PRKCD/KREMEN1/KANK1/INSL3/ALOX5/EMILIN2/SERPINB2/PLAUR/AJAP1/PTPRS/RGMA/SERPING1/TFPI/F12/FAP/WFDC1/ACTA2/MDK/TNFRSF12A/TNR/MIR451A/SCARF1/PLAU/MIR21/PROS1/TAFA5/CAV1/F3/THBS1/MMRN1/PRDX2/EPHB2/KRT1/PTPRF/APOE	43
BP	GO:0010934	macrophage cytokine production	14/2932	37/18903	0.000799984	0.011198	0.00918728	MYD88/TGFB3/PYCARD/UBE2J1/IRAK3/LILRB1/TGFB1/LITAF/PRG2/NOD2/TLR4/GPRC5B/ACP5/HLA-G	14
BP	GO:0010935	regulation of macrophage cytokine production	14/2932	37/18903	0.000799984	0.011198	0.00918728	MYD88/TGFB3/PYCARD/UBE2J1/IRAK3/LILRB1/TGFB1/LITAF/PRG2/NOD2/TLR4/GPRC5B/ACP5/HLA-G	14
BP	GO:0002456	T cell mediated immunity	31/2932	113/18903	0.000816221	0.0113741	0.00933181	IL7R/SCART1/GATA3/LILRB4/B2M/IL18/CTSH/CEACAM1/FADD/NECTIN2/ARG1/FUT7/CD55/IL18R1/HLA-A/ARID5A/ICAM1/LILRB1/HLA-H/IL1B/FCGR2B/CD1C/CLEC4G/CD1E/NOD2/RSAD2/IL1R1/IL23R/SLC22A13/TREX1/HLA-G	31
BP	GO:1905954	positive regulation of lipid localization	31/2932	113/18903	0.000816221	0.0113741	0.00933181	PTCH1/PPARG/PRELID1/DBI/PLIN3/RETN/MAP2K6/PLTP/CYP19A1/PRKCD/ACSL1/PLA2G4A/ATP8A2/NTSR1/NKX3-1/CETP/ZC3H12A/ERFE/EHD1/CES1/PLIN5/IL1B/NFKBIA/NR1H3/CAV1/ABCA13/MSR1/GAL/PTGES/IL1A/APOE	31
BP	GO:0051673	membrane disruption in another organism	7/2932	12/18903	0.000824507	0.0114384	0.00938456	GSDMD/LTF/DEFA3/DEFA1B/DEFA4/DEFA1/DEFA5	7
BP	GO:0070943	neutrophil-mediated killing of symbiont cell	7/2932	12/18903	0.000824507	0.0114384	0.00938456	MYD88/ARG1/CTSG/ELANE/NLRP6/AZU1/SCNN1B	7
BP	GO:0015669	gas transport	10/2932	22/18903	0.000847957	0.0117376	0.00963001	RHAG/BPGM/HBM/AQP1/CA2/HBD/HBB/HBQ1/HBG1/HBG2	10
BP	GO:0002224	toll-like receptor signaling pathway	33/2932	123/18903	0.000862823	0.0118905	0.00975548	MYD88/TLR5/LY96/NMI/FLOT1/NR1D1/CD14/CYBA/IFI35/ARRB2/IRF7/CD300A/IRAK3/PTPRS/TNIP1/OAS1/TLR2/FCRL3/UNC93B1/LTF/LILRA2/ACOD1/NFKBIA/IRF1/NR1H3/NOD2/PIK3AP1/RSAD2/TLR4/LILRA4/CAV1/IRAK2/NLRP6	33
BP	GO:0071675	regulation of mononuclear cell migration	33/2932	123/18903	0.000862823	0.0118905	0.00975548	CCR6/C3AR1/GCSAM/GAS6/AIF1/FADD/PYCARD/SPI1/TRPV4/CCR1/SELENOK/DUSP1/PDGFD/LGALS9/CD200R1/CCN3/MDK/PADI2/MAPK3/CXCL10/ADAM8/CXCL17/CCR7/FPR2/LGALS3/SLAMF8/ECM1/CCL2/THBS1/CXCL12/CCL7/APOD/CCL20	33
BP	GO:0030888	regulation of B cell proliferation	21/2932	67/18903	0.000872282	0.0119944	0.00984066	BST1/IL10/NFATC2/ATM/BCL2/TYROBP/TNFSF13B/CDKN1A/CD300A/BCL6/GPR183/BMI1/FCRL3/FCGR2B/TNFRSF13C/TLR4/CD22/MZB1/EPHB2/TNFRSF13B/IL21	21
BP	GO:0097193	intrinsic apoptotic signaling pathway	67/2932	298/18903	0.000886206	0.012159	0.00997573	S100A9/S100A8/DYRK2/FHIT/CASP4/BCL2A1/NOL3/E2F2/ATM/JMY/NUPR1/STYXL1/RTKN2/BCL2/VNN1/GRINA/CDKN2D/DNAJA1/MMP9/PRKCD/CEBPB/PYCARD/PLAUR/CDKN1A/CLU/SHISA5/SEPTIN4/IFI16/DDIAS/BAK1/E2F1/BCL3/NKX3-1/MUC1/PDCD10/IFI6/NDUFA13/TNFRSF1A/SELENOK/BAD/PML/ACKR3/HSPA1A/HMOX1/IL19/CREB3L1/JAK2/PINK1/MELK/HSPB1/FIS1/CYP1B1/GPX1/MIR21/PRKN/PHLDA3/CHAC1/CAV1/NBN/UBB/CXCL12/EPHA2/SNAI1/CD24/BDKRB2/BCL2L1/ERN2	67
BP	GO:0030641	regulation of cellular pH	26/2932	90/18903	0.000910069	0.012459	0.0102218	ATP6V0E1/MAFG/ATP6V1D/RAB20/BCL2/GRN/ATP6V0D1/SLC26A6/SLC4A7/SLC9A8/SLC4A10/SLC11A1/ATP6V1F/ATP6V0B/RNASEK/SLC9A4/TCIRG1/SLC4A4/TMEM165/MAPK3/ATP6V0C/SLAMF8/SLC4A3/SLC4A9/SLC4A1/CA2	26
BP	GO:0055076	transition metal ion homeostasis	37/2932	143/18903	0.000913131	0.0124734	0.0102337	S100A9/S100A8/B2M/ATOX1/FBXL5/SLC30A4/ATP6V0D1/NEO1/ANKRD9/FTL/SLC11A1/SCO2/MT2A/HYAL2/LCN2/MT1E/MT1G/ERFE/FTH1/RHAG/MT1F/STEAP3/SLC25A37/LTF/HMOX1/BOLA2B/ABCB6/MT1H/EPAS1/PRKN/ALAS2/MT1X/GLRX5/SLC39A8/TFR2/HAMP/EPB42	37
BP	GO:0002824	positive regulation of adaptive immune response based on somatic recombination of immune receptors built from immunoglobulin superfamily domains	31/2932	114/18903	0.000957274	0.0130305	0.0106907	FCGR1A/GATA3/B2M/IL18/MAD2L2/CD28/FADD/TNFSF13B/NECTIN2/TNFSF13/PLA2G4A/CD55/IL18R1/SLC11A1/CD274/HLA-A/ARID5A/CLEC6A/HLA-H/IL1B/TGFB1/JAK2/CD1C/CD1E/NOD2/RSAD2/MIR21/IL1R1/IL23R/SLC22A13/HLA-G	31
BP	GO:0018108	peptidyl-tyrosine phosphorylation	82/2932	380/18903	0.000958093	0.0130305	0.0106907	EPHA4/FCGR1A/DYRK2/LILRA5/BST1/TXK/VPS25/LILRB4/ABI2/IL18/SOCS3/GAS6/ITK/OSM/BMX/STK16/JAK3/MAP2K6/SAMSN1/FGR/FES/PRKCD/RPS6KA5/ARRB2/MVP/HCK/PARP9/CD300A/CAMKK2/HYAL2/SOCS1/IL24/DOCK3/CLEC6A/TNFRSF1A/ANGPT1/LTK/ERBB3/PDGFD/AREG/NCF1/MAP2K3/KIT/EPHA1/CASS4/TTK/HGF/TGFA/PBK/TGFB1/EIF2AK2/MAPK3/JAK2/FLT4/MELK/MERTK/NOD2/IL22RA2/DYRK3/IL23R/GPRC5B/FGFR2/CAV1/PLPP3/FLT3/AATK/EFNA5/SFRP1/EGF/NTRK3/EPH…	82
BP	GO:0043123	positive regulation of I-kappaB kinase/NF-kappaB signaling	46/2932	189/18903	0.000991861	0.0134603	0.0110434	MID2/S100A12/GAPDH/MYD88/LAMTOR5/EDAR/TRAF5/CASP1/CARD16/LGALS1/CLEC4D/TNFSF10/TRIM25/FADD/BST2/LTBR/VAPA/SECTM1/SHISA5/TRIM21/TIFA/S100A4/RBCK1/TRIM22/CLEC6A/TNFRSF1A/PLEKHG5/ALPK1/LGALS9/LTF/IL1B/HMOX1/PINK1/TRIM6/LITAF/CCR7/NOD2/TLR4/PRKN/ECM1/GPRC5B/INAVA/SHARPIN/TSPAN6/IFIT5/IL1A	46
BP	GO:0033077	T cell differentiation in thymus	25/2932	86/18903	0.00102488	0.0138636	0.0113743	BCL11B/IL7R/RASGRP1/CCR6/ZC3H8/TESPA1/CAMK4/GATA3/GBA1/B2M/CD3G/BCL2/VNN1/CD28/FADD/JMJD6/NCAPH2/TOX/BMI1/IL1B/CLEC4G/ADAM8/CCR7/GLI3/IL1A	25
BP	GO:0006898	receptor-mediated endocytosis	59/2932	257/18903	0.00102603	0.0138636	0.0113743	FCGR1A/CD63/FCER1G/ADM/LILRB4/LRPAP1/B2M/FLOT1/ITGAM/DPP4/MARCO/CEACAM1/CAP1/CTSL/CD14/ARRB2/CLU/AP1S1/CUBN/GTF2H2/AP2S1/RALB/CLTB/STAB1/RNASEK/HMMR/ACE2/ASGR1/RAB31/ANGPT1/LILRB1/RABGEF1/CXCL16/ACKR3/CLTCL1/PCSK9/FCGR2B/RIN3/CXCR1/WASF1/ACHE/PDLIM7/SIGLEC1/SDC1/SCARF1/LRP3/CAV1/SGIP1/HIP1/MSR1/NEDD4/LYVE1/EGF/SNCA/TFR2/NECAB2/DRD4/DNAJC6/APOE	59
BP	GO:0002262	myeloid cell homeostasis	42/2932	169/18903	0.00103681	0.0139789	0.0114689	ETS1/GCNT4/HMGB2/GATA3/ANXA1/B2M/PRDX1/MAPK14/JAK3/JMJD6/SPI1/BCL6/ACVR1B/BAK1/ZFP36/RHAG/TGFBR3/HSPA1B/AHSP/ISG15/KIT/HSPA1A/HMOX1/BPGM/JAK2/MERTK/HCAR2/DYRK3/EPAS1/INHBA/ALAS2/TSPO2/KLF1/TRIM10/TAL1/SLC4A1/GATA1/FAM210B/TRIM58/HAMP/EPB42/SCNN1B	42
BP	GO:0050678	regulation of epithelial cell proliferation	88/2932	414/18903	0.00104378	0.0140426	0.0115211	BCL11B/NOG/AKT3/HMGB2/IL10/PTCH1/PPARG/GATA3/PTPRK/SYNJ2BP/NLRC3/B2M/PLCG1/NUPR1/SEMA5A/CEACAM1/ACVRL1/LRG1/GRN/NR1D1/ARG1/CYBA/ALOX5/ST8SIA1/HPN/STXBP4/FGF9/STK3/ZFP36/WNT7A/NKX3-1/EDNRB/PDCD10/NME1/DBH/EAF2/TGFBR3/BAD/ANG/BMPR1A/AREG/POLD4/HMOX1/PRL/MYDGF/RAP1GAP/ALDH1A2/CCL24/MDK/TGFA/IQGAP3/TGFB1/EGFL7/FLT4/FUT2/HLX/NOD2/PGF/GPX1/OVOL1/MIR21/RIDA/ECM1/FGFR2/ID1/COL4A3/CAV1/F3/PLXNB3/GPBAR1/CC…	88
BP	GO:0001912	positive regulation of leukocyte mediated cytotoxicity	19/2932	59/18903	0.00104941	0.0140879	0.0115583	RASGRP1/B2M/ITGAM/FADD/TYROBP/NECTIN2/ARG1/SPI1/VAV1/KLRC4/HLA-A/HLA-H/CD1C/CD1E/IL23R/SLC22A13/HLA-G/LAG3/IL21	19
BP	GO:0008585	female gonad development	29/2932	105/18903	0.00105306	0.0141065	0.0115736	PLEKHA1/IDH1/ATM/NUPR1/BCL2/RETN/CYP19A1/CEBPB/IMMP2L/TNFAIP6/ARRB2/ANG/KIT/PTX3/FOXC1/ADAMTS1/MMP14/FZD4/INHBA/MMP2/CSMD1/UBB/PCYT1B/COL9A3/SFRP1/INHBB/DMC1/PTPRN/BCL2L1	29
BP	GO:0060142	regulation of syncytium formation by plasma membrane fusion	12/2932	30/18903	0.00105824	0.0141454	0.0116055	NFATC2/FLOT1/CD53/MAPK14/TYROBP/IL4R/ADAM9/EHD1/GDF15/CXCL10/RAPGEF3/CXCL9	12
BP	GO:0034121	regulation of toll-like receptor signaling pathway	23/2932	77/18903	0.00106736	0.0142368	0.0116804	TLR5/FLOT1/NR1D1/CD14/CYBA/IFI35/ARRB2/IRF7/CD300A/IRAK3/PTPRS/TLR2/FCRL3/LTF/LILRA2/ACOD1/IRF1/NR1H3/NOD2/RSAD2/LILRA4/CAV1/NLRP6	23
BP	GO:0002281	macrophage activation involved in immune response	9/2932	19/18903	0.00107389	0.0142932	0.0117268	NMI/DYSF/TYROBP/GRN/IFI35/SBNO2/SUCNR1/TREX1/IL33	9
BP	GO:2000117	negative regulation of cysteine-type endopeptidase activity	26/2932	91/18903	0.00108906	0.0143889	0.0118053	LAMTOR5/CST7/CARD16/NOL3/GAS6/NAIP/CDKN2D/MMP9/PRDX5/ARRB2/POR/PLAUR/IFI16/SIAH2/MICAL1/IFI6/BIRC5/LTF/HGF/GPX1/ADORA2A/LAMP3/AQP1/THBS1/SNCA/DPEP1	26
BP	GO:0036336	dendritic cell migration	13/2932	34/18903	0.00109032	0.0143889	0.0118053	CCR6/TRPM2/GAS6/EXT1/ALOX5/SPI1/GPR183/CCR1/NLRP12/LGALS9/CXCR1/CCR7/SLAMF8	13
BP	GO:0039528	cytoplasmic pattern recognition receptor signaling pathway in response to virus	13/2932	34/18903	0.00109032	0.0143889	0.0118053	UFD1/RNF125/RNF135/IRF7/OASL/RIOK3/OAS3/DHX58/TSPAN6/IFIH1/RIGI/DDX60/TRIM15	13
BP	GO:0090322	regulation of superoxide metabolic process	13/2932	34/18903	0.00109032	0.0143889	0.0118053	BST1/CD177/ITGAM/TYROBP/PRKCD/CYBA/FBLN5/TGFB1/FPR2/GCH1/MIR21/ACP5/H19	13
BP	GO:0045765	regulation of angiogenesis	76/2932	349/18903	0.00110287	0.0145238	0.0119159	ETS1/AMOT/ANXA3/AKT3/HTATIP2/IL10/ADM/PPARG/C3AR1/RECK/PGK1/SYNJ2BP/GADD45A/PLCG1/E2F2/SEMA5A/CTSH/CEACAM1/ISM1/NR2E1/ACVRL1/LRG1/GRN/SEMA4A/ALOX5/CAMP/EMILIN2/SPHK1/NIBAN2/STAB1/ADAM12/PDCD10/RRAS/ZC3H12A/PML/EPN1/IL1B/EPHA1/HMOX1/PRL/MYDGF/HGF/CREB3L1/CCL24/MDK/GPR4/ADGRB2/SMAD1/CXCL10/FOXC1/WARS1/MIR451A/HSPB1/ADAMTS1/CYP1B1/PGF/MIR21/PF4/ADM2/ECM1/TAFA5/COL4A3/F3/AQP1/RAPGEF3/THBS1/SFRP1/JCAD…	76
BP	GO:2000107	negative regulation of leukocyte apoptotic process	18/2932	55/18903	0.00114164	0.0149647	0.0122777	BCL11B/IL7R/GAS6/JAK3/BCL2/FADD/IRF7/BCL6/BCL3/LILRB1/AURKB/MERTK/CCR7/NOD2/IDO1/CXCL12/PTCRA/BCL2L1	18
BP	GO:0002821	positive regulation of adaptive immune response	32/2932	120/18903	0.00114412	0.0149647	0.0122777	FCGR1A/GATA3/B2M/IL18/MAD2L2/CD28/FADD/TNFSF13B/NECTIN2/TNFSF13/PLA2G4A/CD55/PYCARD/IL18R1/SLC11A1/CD274/HLA-A/ARID5A/CLEC6A/HLA-H/IL1B/TGFB1/JAK2/CD1C/CD1E/NOD2/RSAD2/MIR21/IL1R1/IL23R/SLC22A13/HLA-G	32
BP	GO:0032091	negative regulation of protein binding	27/2932	96/18903	0.00114596	0.0149647	0.0122777	NOG/IL10/LRPAP1/CARD16/CTSZ/B2M/SLPI/DHRS7B/PRKCD/ARRB2/CDKN1A/RALB/RGMA/AURKB/PCSK9/DISC1/MAPK3/AURKA/DACT1/IFIT1/ID1/CAV1/NES/IFIT2/CCL23/WFIKKN1/PTPRF	27
BP	GO:0070664	negative regulation of leukocyte proliferation	27/2932	96/18903	0.00114596	0.0149647	0.0122777	IL10/LILRB4/ATM/TYROBP/CEBPB/ARG1/ZBTB7B/CD300A/VSIG4/BCL6/PDCD1LG2/CD274/CR1/VSIR/DLG5/LILRB1/LGALS9/FCGR2B/CLEC4G/LST1/ENPP3/IDO1/CCL8/GAL/HLA-G/IL33/TNFRSF13B	27
BP	GO:0043280	positive regulation of cysteine-type endopeptidase activity involved in apoptotic process	33/2932	125/18903	0.00116413	0.0151702	0.0124462	S100A9/S100A8/NLRC4/PPARG/CASP1/GPER1/CTSH/CTSD/TNFSF10/ACVR1C/PYCARD/BAK1/NKX3-1/P2RX1/NDUFA13/BAD/PML/NLRP12/ST20/LGALS9/DLC1/CCN2/JAK2/GSN/FIS1/HSPE1/FAS/COL4A3/F3/HIP1/SOX7/SNCA/ROBO1	33
BP	GO:0042542	response to hydrogen peroxide	34/2932	130/18903	0.00117949	0.0153294	0.0125769	TXN/PLEKHA1/HP/IL10/TRPM2/ANXA1/FKBP1B/GPR37L1/BCL2/FOSL1/PRKCD/ARG1/ADAM9/SPHK1/BAK1/PDCD10/BAD/CDK1/PDGFD/AREG/HMOX1/HGF/PINK1/SIRPA/PYCR1/CYP1B1/SDC1/GPX1/MIR21/MMP2/AQP1/COL1A1/MET/HBB	34
BP	GO:0030003	cellular cation homeostasis	103/2932	499/18903	0.00118127	0.0153294	0.0125769	GSTO1/S100A9/S100A8/ATP6V0E1/MAFG/ATP6V1D/TRPM2/RAB20/NOL3/SLC1A3/FKBP1B/PLCG1/GPER1/BCL2/ATOX1/GRINA/SLC30A4/GRN/CYBA/ATP6V0D1/SLC26A6/SLC4A7/ANKRD9/SLC9A8/FTL/TRPC1/NTSR1/SLC4A10/SLC11A1/ATP6V1F/TMEM38A/SCO2/ATP6V0B/BAK1/MT2A/RNASEK/SLC9A4/LCN2/P2RX1/MT1E/MT1G/TRPV4/TCIRG1/ERFE/FTH1/CCR1/SLC4A4/SELENOK/KCNMA1/PML/MT1F/DISC1/ATP13A4/HMOX1/GP1BB/MCOLN1/MICU3/TMEM165/CLIC2/MAPK3/BOLA2B/CXCL10/TGM2…	103
BP	GO:0070371	ERK1 and ERK2 cascade	74/2932	340/18903	0.00129097	0.0167006	0.0137018	EPHA4/RASGRP1/DUSP3/GLIPR2/SYNJ2BP/GAS6/TNFAIP8L3/GPER1/MARCO/CTSH/CEACAM1/ARRB2/GRB10/PYCARD/NDRG2/GPR183/TNIP1/CAVIN3/ICAM1/ACE2/RRAS/TRPV4/CCR1/ANGPT1/NLRP12/ACKR3/CDK1/PDGFD/LGALS9/ATF3/IL1B/ACTA2/CCL24/IQGAP3/TGFB1/CCN2/MAPK3/GBP1/FLT4/CXCL17/DDT/SIRPA/CCR7/FPR2/NOD2/TLR4/MIR21/INHBA/HESX1/FGFR2/CCL8/P2RY6/GPBAR1/CCL2/CCL25/NLRP6/AKAP12/EGF/EPHA2/EPHB2/IL26/LIF/CCL7/IL1A/CCL23/IGF1/PDGFC/NEC…	74
BP	GO:0046794	transport of virus	10/2932	23/18903	0.00129309	0.0167006	0.0137018	DYNLT1/NMT2/DPP4/CTSL/BST2/RNASEK/ACE2/SIGLEC1/CAV1/TRIM15	10
BP	GO:0043154	negative regulation of cysteine-type endopeptidase activity involved in apoptotic process	23/2932	78/18903	0.00129497	0.0167006	0.0137018	LAMTOR5/CARD16/NOL3/GAS6/NAIP/CDKN2D/MMP9/PRDX5/ARRB2/POR/PLAUR/SIAH2/MICAL1/IFI6/BIRC5/HGF/GPX1/ADORA2A/LAMP3/AQP1/THBS1/SNCA/DPEP1	23
BP	GO:0002886	regulation of myeloid leukocyte mediated immunity	19/2932	60/18903	0.00131558	0.0168985	0.0138642	FCGR1A/CD177/ITGAM/FGR/TYROBP/FES/ARG1/STXBP2/SPI1/CD300A/IL4R/RAC2/RABGEF1/LGALS9/HMOX1/FCGR2B/DNASE1L3/RIGI/GATA1	19
BP	GO:0002861	regulation of inflammatory response to antigenic stimulus	16/2932	47/18903	0.00132008	0.0168985	0.0138642	FCGR1A/IL10/PLCG1/MAPK14/FGR/CD28/RHBDF2/FUT7/HCK/FURIN/FCGR2B/CCR7/NOD2/GPX1/GPR17/NLRP6	16
BP	GO:0034112	positive regulation of homotypic cell-cell adhesion	8/2932	16/18903	0.00132117	0.0168985	0.0138642	ANK3/EMILIN2/PLAUR/JAK2/CTSG/MMRN1/MFSD2B/PDPN	8
BP	GO:1901741	positive regulation of myoblast fusion	8/2932	16/18903	0.00132117	0.0168985	0.0138642	NFATC2/FLOT1/CD53/MAPK14/IL4R/EHD1/GDF15/CXCL9	8
BP	GO:0051258	protein polymerization	63/2932	281/18903	0.0013333	0.0170187	0.0139628	ARPC3/CAPG/MSRB2/SPTBN1/RNF135/PSTPIP2/MSRB1/AIF1/FES/PRKCD/CAPZA1/KANK1/ARPC1B/UBE2C/GAS7/PAK3/HCK/PYCARD/VASP/UBE2S/CATIP/CHMP2A/FGF13/TMSB10/TRPV4/CDC42EP3/CAPZA2/ARL6/ANG/HSP90AA1/HSPA1B/DBN1/TWF2/HSPA1A/CCL24/TPPP/JAK2/PINK1/GSN/TRIM6/CAMSAP2/WASF1/TPX2/CCR7/CDK5RAP2/DIAPH3/PRKN/FHDC1/TUBG1/SPTA1/NEFL/ESAM/FKBP4/MICALL2/CAMSAP3/SNCA/TENM1/MET/FAM107A/ALOX15/TMOD1/CDC42EP1/DAAM2	63
BP	GO:0030336	negative regulation of cell migration	79/2932	368/18903	0.00136791	0.0174247	0.0142959	EPHA4/NOG/TCAF1/IFITM1/PPARG/DUSP3/CCL28/RECK/PTPRK/SYNJ2BP/GCSAM/GADD45A/DPP4/PHLDB2/TIMP1/BCL2/MIIP/AIF1/ACVRL1/CYP19A1/BST2/KANK1/TNFAIP6/ACVR1C/EMILIN2/SAP30/CD300A/TRIB1/MCTP1/TET1/HYAL2/IL24/PDCD10/RRAS/DLG5/DACH1/RABGEF1/BMPR1A/DUSP1/MIR223/CD200R1/CCN3/DLC1/EPHA1/HMOX1/MMP28/IGFBP3/PADI2/NEXMIF/TGFB1/RIN3/DDT/MIR451A/CYP1B1/MIR21/ATP1B2/SLAMF8/TMIGD3/TAFA5/WNT11/PLXNB3/CCL2/CCL25/HAS1/THB…	79
BP	GO:0016266	O-glycan processing	15/2932	43/18903	0.00139726	0.0177262	0.0145433	GCNT4/C1GALT1C1/GALNT12/ST3GAL4/GALNT13/GALNT14/ST3GAL2/B4GALT5/GALNT2/B3GNT8/GALNT3/ST6GALNAC4/B3GNT5/B3GNT3/GALNT5	15
BP	GO:0045622	regulation of T-helper cell differentiation	15/2932	43/18903	0.00139726	0.0177262	0.0145433	GATA3/BATF/ANXA1/IL18/IL27/JAK3/JUNB/ZBTB7B/IL4R/BCL6/ZC3H12A/RARA/HLX/MIR21/IL23R	15
BP	GO:0000819	sister chromatid segregation	55/2932	239/18903	0.00140314	0.0177645	0.0145747	AXIN2/SMARCD3/MAD2L1BP/ATM/CHMP5/MAD2L2/UBE2C/CHMP2A/CDC6/DLGAP5/NCAPH2/BIRC5/DUSP1/SPC25/AURKB/CDCA5/KIF4A/USP44/CDC20/KIF18B/TTK/PTTG1/TOP2A/KIF14/NUSAP1/RMI2/KIFC1/BUB1/PLK1/SPC24/ESPL1/CDK5RAP2/NCAPG/KIF11/NEK2/KIF23/ZWINT/BUB1B/CDT1/NUF2/CCNB1/DSCC1/TUBG1/CHMP4C/KIF2C/ESCO2/TRIP13/CENPE/CDCA8/HASPIN/NDC80/SPAG5/NCAPH/CENPF/KIF18A	55
BP	GO:0036037	CD8-positive, alpha-beta T cell activation	11/2932	27/18903	0.0014251	0.0179695	0.0147429	LILRB4/BCL2/ZBTB7B/CD274/HLA-A/SOCS1/VSIR/TOX/LILRB1/IRF1/EOMES	11
BP	GO:1905820	positive regulation of chromosome separation	11/2932	27/18903	0.0014251	0.0179695	0.0147429	PLSCR1/MAD2L1BP/DLGAP5/NCAPH2/BIRC5/AURKB/ESPL1/NCAPG/CDT1/CDCA8/NCAPH	11
BP	GO:0010718	positive regulation of epithelial to mesenchymal transition	18/2932	56/18903	0.00144191	0.0181448	0.0148867	LEF1/BCL9L/AXIN2/GLIPR2/LRG1/TGFB3/TIAM1/IL1B/MDK/TGFB1/BAMBI/FOXC1/MIR21/OLFM1/TGFB1I1/COL1A1/SNAI1/PDPN	18
BP	GO:0050688	regulation of defense response to virus	22/2932	74/18903	0.00145233	0.018239	0.014964	UFD1/AIM2/RNF125/IL27/PYCARD/PARP9/CGAS/ZC3H12A/SELENOK/LILRB1/HSP90AA1/IL1B/TRIM6/RIOK3/IL23R/IFIT1/IFIT1B/HERC5/DHX58/TSPAN6/RIGI/HTRA1	22
BP	GO:0045066	regulatory T cell differentiation	14/2932	39/18903	0.00145744	0.0182664	0.0149865	LILRB4/CD28/FUT7/BCL6/CR1/SOCS1/VSIR/TOX/LGALS9/MDK/IRF1/MIR21/HLA-G/LAG3	14
BP	GO:0060760	positive regulation of response to cytokine stimulus	20/2932	65/18903	0.00147758	0.0184817	0.0151631	TXK/CASP1/CASP4/GAS6/AGPAT2/FADD/IRF7/PARP9/TLR2/ZBP1/HSPA1B/LRRC70/HSPA1A/TRIM6/TLR4/IL1R1/PRKN/IFIH1/RIGI/NLRP6	20
BP	GO:0002230	positive regulation of defense response to virus by host	12/2932	31/18903	0.00148529	0.0185372	0.0152086	AIM2/IL27/PYCARD/PARP9/CGAS/ZC3H12A/SELENOK/LILRB1/HSP90AA1/TRIM6/IL23R/RIGI	12
BP	GO:0002446	neutrophil mediated immunity	13/2932	35/18903	0.00149095	0.0185372	0.0152086	ANXA3/MYD88/CD177/ITGAM/ARG1/STXBP2/SPI1/DNASE1L3/CTSG/ELANE/NLRP6/AZU1/SCNN1B	13
BP	GO:0006691	leukotriene metabolic process	13/2932	35/18903	0.00149095	0.0185372	0.0152086	ALOX5AP/ALOX5/PLA2G4A/LTA4H/PTGR1/GGT1/GGTLC2/GGT2P/TLR2/GGT3P/PRG3/GGT5/DPEP1	13
BP	GO:0048732	gland development	92/2932	441/18903	0.00149924	0.0186032	0.0152628	BCL11B/NOG/LEF1/IL10/PTCH1/EDAR/GATA3/ANXA1/TAF10/ATM/MTX1/BCL2/CEACAM1/LBH/EXT1/CYP19A1/FADD/CACNB4/TSPO/CEBPB/ARG1/TGFB3/RPGRIP1L/CEBPA/HPN/ZBTB7B/NTN4/DKK3/TPH1/NKX3-1/UPB1/NME1/MPST/ARHGAP5/EAF2/HOXB3/TGFBR3/CCNB2/PML/BMPR1A/PCSK9/AREG/TG/HMOX1/PRL/SLC7A5/RARA/HGF/RAP1GAP/ALDH1A2/MDK/TGFA/IQGAP3/TGFB1/SLC29A2/MAPK3/JAK2/FOXC1/TGM2/HLX/AURKA/CYP1B1/GPX1/E2F8/ATP2C2/MMP2/CSMD1/HESX1/FGFR2/ASS1/…	92
BP	GO:0002524	hypersensitivity	7/2932	13/18903	0.00154758	0.0190889	0.0156613	FCGR1A/GATA3/EXT1/FUT7/FCGR2B/CCR7/IGHG1	7
BP	GO:0097048	dendritic cell apoptotic process	7/2932	13/18903	0.00154758	0.0190889	0.0156613	GAS6/BCL2/LILRB1/LGALS9/CCR7/CXCL12/BCL2L1	7
BP	GO:2000668	regulation of dendritic cell apoptotic process	7/2932	13/18903	0.00154758	0.0190889	0.0156613	GAS6/BCL2/LILRB1/LGALS9/CCR7/CXCL12/BCL2L1	7
BP	GO:0038061	NIK/NF-kappaB signaling	36/2932	142/18903	0.00156918	0.0192628	0.015804	NR3C2/EDAR/NMI/NLRC3/IL18/NOL3/ILK/PRDX1/RTKN2/MMP8/ADGRG3/CD14/IFI35/SPI1/IL18R1/TRIP6/SPHK1/BCL3/RBCK1/PPP4C/ZC3H12A/TLR2/NLRP12/LGALS9/MIR223/CCN3/IL1B/RELB/NFKBIA/EIF2AK2/LITAF/NOD2/TLR4/MIR21/TSPAN6/ADIPOR1	36
BP	GO:0002762	negative regulation of myeloid leukocyte differentiation	17/2932	52/18903	0.00157096	0.0192628	0.015804	C1QC/LILRB4/ZBTB46/CEACAM1/TNFAIP6/LILRB3/FSTL3/TRIB1/LILRB1/GPR137/LTF/RARA/TLR4/INHBA/SFRP1/CLDN18/FBN1	17
BP	GO:0010543	regulation of platelet activation	17/2932	52/18903	0.00157096	0.0192628	0.015804	FCER1G/TXK/CEACAM1/PRKCD/EMILIN2/PLA2G4A/PLEK/GP1BB/JAK2/SELP/TLR4/CTSG/GP9/MMRN1/MFSD2B/PDPN/APOE	17
BP	GO:0061458	reproductive system development	68/2932	310/18903	0.0016057	0.0196502	0.0161218	NOG/PLEKHA1/HMGB2/PTCH1/RAB13/GATA3/IDH1/ANXA1/ATM/NUPR1/KCNE1/BCL2/RETN/TNFSF10/CYP19A1/CEBPB/INSL3/IMMP2L/TNFAIP6/ARRB2/H3-3B/FGF9/H3-3A/BIK/BAK1/PLEKHA5/WNT7A/NKX3-1/EAF2/ANG/BASP1/TIFAB/KIT/RARA/RBP4/PTX3/DCANP1/PRDX4/MERTK/FOXC1/ADAMTS1/CYP1B1/SDC1/SOX8/MMP14/FZD4/INHBA/MMP2/CSMD1/ASPM/HESX1/LHX1/FGFR2/FKBP4/UBB/PCYT1B/COL9A3/SFRP1/INHBB/GATA6/GLI3/DMC1/GATA1/IL1A/PTPRN/BCL2L1/KIF18A/ALOX15B	68
BP	GO:0032677	regulation of interleukin-8 production	28/2932	103/18903	0.00165285	0.0201875	0.0165626	MYD88/LAMTOR5/IL10/TLR5/ANXA1/FADD/CD58/CD14/FCN1/FFAR2/PYCARD/BCL3/HYAL2/BPI/TLR2/HSPA1B/LGALS9/IL1B/HSPA1A/LILRA2/APOA2/NOD2/TLR4/PRG3/F3/ELANE/RIGI/DEFA5	28
BP	GO:0045342	MHC class II biosynthetic process	9/2932	20/18903	0.00168548	0.0205457	0.0168566	IL10/SPI1/SLC11A1/RFXANK/JAK2/TLR4/PF4/AZU1/IL33	9
BP	GO:0043270	positive regulation of ion transport	64/2932	289/18903	0.00169363	0.0205863	0.0168899	AMIGO1/GLRX/GSTO1/LILRA5/TCAF1/ABCB1/PLCG1/COX17/IFNGR2/GPER1/KCNE1/JAK3/MAP2K6/SLC38A1/ANK3/CACNB4/TSPO/CEBPB/SCN1B/NDUFA4/STAC3/ARRB2/PLA2G4A/TRPC1/NTSR1/BAK1/CDK5/P2RX1/KCNE5/ACE2/CCR1/IL1B/LILRA2/PINK1/CXCL10/AKAP5/ATP2C2/MIR21/ATP1B2/ADORA2A/LGALS3/KCNJ2/MS4A1/CAV1/P2RY6/CCL2/CXCL11/GAL/CXCL12/STAC/PTGES/MCHR1/EPHB2/SNCA/SYT1/RYR2/ABCB11/GJC2/IL1A/CXCL9/NOS1AP/KCNH2/DRD4/SCN5A	64
BP	GO:0019882	antigen processing and presentation	29/2932	108/18903	0.00169542	0.0205863	0.0168899	FCGR1A/RAB32/FCER1G/IFI30/GBA1/B2M/CTSH/CTSD/PSMB8/CTSL/EXT1/PYCARD/SLC11A1/TAP1/HLA-C/HLA-A/ICAM1/HLA-H/RELB/FCGR2B/CD1C/HLA-DOA/CCR7/CD1E/NOD2/THBS1/TREX1/HLA-G/CTSE	29
BP	GO:0030218	erythrocyte differentiation	33/2932	128/18903	0.00178703	0.0216564	0.0177678	ETS1/HMGB2/GATA3/B2M/MAPK14/JAK3/JMJD6/SPI1/BCL6/ACVR1B/ZFP36/RHAG/TGFBR3/HSPA1B/AHSP/ISG15/KIT/HSPA1A/BPGM/JAK2/DYRK3/EPAS1/INHBA/ALAS2/TSPO2/KLF1/TRIM10/TAL1/SLC4A1/GATA1/FAM210B/TRIM58/EPB42	33
BP	GO:0051896	regulation of protein kinase B signaling	45/2932	189/18903	0.00179396	0.0216983	0.0178021	TXN/PLEKHA1/GATA3/IL18/GAS6/OSM/TNFAIP8L3/GPER1/SEMA5A/CD28/ARRB2/STK3/TSPYL5/HYAL2/CAVIN3/RRAS/ANGPT1/HSP90AA1/GDF15/CASS4/MYDGF/TGFB1/PINK1/ADAM8/FAM110C/MIR451A/CCR7/GPX1/MIR21/PHLDA3/GRM2/F3/SFRP5/HIP1/THBS1/EGF/HLA-G/NTRK3/EPHA2/IL26/MET/IGF2/IGF1/H19/MEIS3	45
BP	GO:0010332	response to gamma radiation	18/2932	57/18903	0.00180641	0.0217643	0.0178563	GATA3/ATM/BCL2/CYBA/MAP3K20/CDKN1A/BAK1/TSPYL5/PML/CXCL10/GPX1/MIR21/H2AX/RAD51/TREX1/CCL7/IL1A/BCL2L1	18
BP	GO:0038066	p38MAPK cascade	18/2932	57/18903	0.00180641	0.0217643	0.0178563	GADD45B/GADD45A/MAPK14/MAP2K6/MAP3K20/SPI1/SPHK1/ZFP36/GADD45G/ZC3H12A/DUSP1/LGALS9/NCF1/MAP2K3/IL1B/HGF/PBK/PER1	18
BP	GO:0048608	reproductive structure development	67/2932	306/18903	0.0018144	0.0218184	0.0179007	NOG/PLEKHA1/HMGB2/PTCH1/RAB13/GATA3/IDH1/ANXA1/ATM/NUPR1/KCNE1/BCL2/RETN/TNFSF10/CYP19A1/CEBPB/INSL3/IMMP2L/TNFAIP6/ARRB2/H3-3B/FGF9/H3-3A/BIK/BAK1/WNT7A/NKX3-1/EAF2/ANG/BASP1/TIFAB/KIT/RARA/RBP4/PTX3/DCANP1/PRDX4/MERTK/FOXC1/ADAMTS1/CYP1B1/SDC1/SOX8/MMP14/FZD4/INHBA/MMP2/CSMD1/ASPM/HESX1/LHX1/FGFR2/FKBP4/UBB/PCYT1B/COL9A3/SFRP1/INHBB/GATA6/GLI3/DMC1/GATA1/IL1A/PTPRN/BCL2L1/KIF18A/ALOX15B	67
BP	GO:0014911	positive regulation of smooth muscle cell migration	15/2932	44/18903	0.00182	0.0218435	0.0179213	BCL2/AIF1/S100A11/FGF9/PDGFD/MDK/MIR451A/ADAMTS1/CYP1B1/TLR4/MIR21/P2RY6/DOCK4/IGF1/TERT	15
BP	GO:0045580	regulation of T cell differentiation	43/2932	179/18903	0.00186422	0.0223313	0.0183215	LEF1/IL7R/RASGRP1/TCF7/ZC3H8/TESPA1/CAMK4/GATA3/PRELID1/LILRB4/SMARCD3/BATF/ANXA1/IL18/IL27/JAK3/VNN1/CD28/JUNB/ZBTB7B/IL4R/BCL6/CR1/SOCS1/VSIR/TOX/PNP/ZC3H12A/BAD/LGALS9/RARA/MDK/IRF1/CLEC4G/HLA-DOA/ADAM8/HLX/MIR21/IL23R/HLA-G/PRDX2/GLI3/LAG3	43
BP	GO:0014068	positive regulation of phosphatidylinositol 3-kinase signaling	23/2932	80/18903	0.0018771	0.0224424	0.0184126	IL18/OSM/GPER1/FGR/CD28/NKX3-1/ANGPT1/ERBB3/PDGFD/NCF1/KIT/MYDGF/HGF/JAK2/SELP/PIK3AP1/MIR21/NEDD4/FLT3/EGF/NTRK3/IGF1/PDGFC	23
BP	GO:0006885	regulation of pH	27/2932	99/18903	0.00188205	0.0224584	0.0184258	ATP6V0E1/MAFG/ATP6V1D/RAB20/BCL2/GRN/ATP6V0D1/SLC26A6/SLC4A7/SLC9A8/SLC4A10/SLC11A1/ATP6V1F/ATP6V0B/RNASEK/SLC9A4/EDNRB/TCIRG1/SLC4A4/TMEM165/MAPK3/ATP6V0C/SLAMF8/SLC4A3/SLC4A9/SLC4A1/CA2	27
BP	GO:0002755	MyD88-dependent toll-like receptor signaling pathway	10/2932	24/18903	0.00191121	0.022633	0.018569	MYD88/TLR5/IRF7/CD300A/IRAK3/TNIP1/TLR2/IRF1/TLR4/IRAK2	10
BP	GO:0006213	pyrimidine nucleoside metabolic process	10/2932	24/18903	0.00191121	0.022633	0.018569	UPP1/APOBEC3B/APOBEC3A/TYMP/TK1/UPB1/CDA/NT5C3A/CDADC1/AICDA	10
BP	GO:0035458	cellular response to interferon-beta	10/2932	24/18903	0.00191121	0.022633	0.018569	AIM2/IFITM2/IFI16/OAS1/NDUFA13/ACOD1/IRF1/TRIM6/CDC34/TREX1	10
BP	GO:0051043	regulation of membrane protein ectodomain proteolysis	10/2932	24/18903	0.00191121	0.022633	0.018569	IL10/TIMP1/ADAM9/FURIN/RGMA/TIMP4/IL1B/ADAM8/TIMP3/APOE	10
BP	GO:0032637	interleukin-8 production	28/2932	104/18903	0.00193306	0.022805	0.0187101	MYD88/LAMTOR5/IL10/TLR5/ANXA1/FADD/CD58/CD14/FCN1/FFAR2/PYCARD/BCL3/HYAL2/BPI/TLR2/HSPA1B/LGALS9/IL1B/HSPA1A/LILRA2/APOA2/NOD2/TLR4/PRG3/F3/ELANE/RIGI/DEFA5	28
BP	GO:0042100	B cell proliferation	28/2932	104/18903	0.00193306	0.022805	0.0187101	LEF1/IL7R/RASGRP1/BST1/IL10/CD40LG/NFATC2/ATM/BCL2/CR2/TYROBP/TNFSF13B/PRKCD/CDKN1A/CD300A/BCL6/GPR183/BMI1/FCRL3/FCGR2B/TNFRSF13C/TLR4/CD22/MS4A1/MZB1/EPHB2/TNFRSF13B/IL21	28
BP	GO:0051100	negative regulation of binding	40/2932	164/18903	0.00195587	0.0229871	0.0188595	NOG/LEF1/IL10/LRPAP1/CARD16/CTSZ/B2M/SLPI/DHRS7B/C4orf3/MAD2L2/PRKCD/HABP4/ARRB2/CDKN1A/IFI16/RALB/E2F1/RGMA/AURKB/PCSK9/DISC1/HMOX1/RAP1GAP/NFKBIA/MAPK3/JAK2/AURKA/DACT1/NEK2/IFIT1/ID1/CAV1/NES/ZNF462/IFIT2/GATA1/CCL23/WFIKKN1/PTPRF	40
BP	GO:0055067	monovalent inorganic cation homeostasis	40/2932	164/18903	0.00195587	0.0229871	0.0188595	KLHL3/ATP6V0E1/MAFG/ATP6V1D/RAB20/SLC1A3/BCL2/EXT1/GRN/ATP6V0D1/SLC26A6/SLC4A7/SLC9A8/SLC4A10/SLC11A1/ATP6V1F/ATP6V0B/RNASEK/SLC9A4/EDNRB/SLC12A9/TCIRG1/SLC4A4/RHAG/KCNMA1/TMEM165/MAPK3/ATP6V0C/ATP1B2/ADORA2A/SLC12A8/SLAMF8/KCNJ2/SLC4A3/SLC4A9/SLC4A1/CA2/IL1A/KCNH2/SCNN1B	40
BP	GO:0002548	monocyte chemotaxis	21/2932	71/18903	0.00197666	0.0231806	0.0190183	S100A12/ANXA1/AIF1/CCR1/DUSP1/CCN3/CCL24/CXCL10/CXCL17/FPR2/LGALS3/SLAMF8/CCL8/CTSG/CCL2/CCL25/CXCL12/CCL7/CCL23/CCL18/CCL20	21
BP	GO:0051453	regulation of intracellular pH	24/2932	85/18903	0.00198008	0.0231806	0.0190183	ATP6V0E1/ATP6V1D/RAB20/BCL2/GRN/ATP6V0D1/SLC26A6/SLC4A7/SLC9A8/SLC4A10/SLC11A1/ATP6V1F/ATP6V0B/RNASEK/SLC9A4/TCIRG1/SLC4A4/TMEM165/ATP6V0C/SLAMF8/SLC4A3/SLC4A9/SLC4A1/CA2	24
BP	GO:0048146	positive regulation of fibroblast proliferation	17/2932	53/18903	0.0019835	0.0231806	0.0190183	S100A6/GAS6/CDKN1A/SPHK1/E2F1/CDC6/BMI1/PML/PDGFD/NDUFS4/CCNB1/CD248/AQP1/CCNA2/LIF/IGF1/PDGFC	17
BP	GO:0044772	mitotic cell cycle phase transition	97/2932	473/18903	0.00199008	0.0232139	0.0190456	NPAT/SMARCD3/ANXA1/MAD2L1BP/ABCB1/TAF10/ATM/BCL2/MAD2L2/CDKN2C/MIIP/CDKN2D/AIF1/LSM10/CACNB4/PKIA/UBE2C/CCND3/CDKN1A/UBE2S/ACVR1B/CHMP2A/E2F1/PKMYT1/CDK5/CDC6/MUC1/CCNA1/DLGAP5/CKS2/BIRC5/CCNB2/PML/DUSP1/SPC25/RRM2/CDK1/AURKB/CDC25C/CDCA5/USP44/CDC20/ANLN/CLSPN/TFDP1/CDKN3/GTSE1/TTK/KIF14/PSME2/CDC25A/IQGAP3/MELK/MIR451A/BUB1/PLK1/SPC24/DTL/ADAMTS1/ESPL1/AURKA/CDK5RAP2/DACT1/INHBA/ZWINT/BUB1B/CDT…	97
BP	GO:0010758	regulation of macrophage chemotaxis	11/2932	28/18903	0.00202155	0.0234608	0.0192482	C3AR1/CYP19A1/MTUS1/TRPV4/MMP28/MDK/MAPK3/CXCL17/DDT/SLAMF8/THBS1	11
BP	GO:0031102	neuron projection regeneration	19/2932	62/18903	0.00202255	0.0234608	0.0192482	EPHA4/MTR/ADM/FKBP1B/BCL2/GRN/TSPO/KREMEN1/PTPRS/RGMA/HGF/TNR/JAK2/OMG/SCARF1/MMP2/NEFL/PTPRF/APOD	19
BP	GO:0045428	regulation of nitric oxide biosynthetic process	19/2932	62/18903	0.00202255	0.0234608	0.0192482	GLA/IL10/DDAH2/AIF1/TSPO/MMP8/CLU/ZC3H12A/HSP90AA1/IL1B/PTX3/JAK2/SIRPA/TLR4/ASS1/CAV1/ACP5/NOS1AP/HBB	19
BP	GO:0002862	negative regulation of inflammatory response to antigenic stimulus	12/2932	32/18903	0.00204481	0.0235662	0.0193347	IL10/PLCG1/MAPK14/FGR/RHBDF2/HCK/FURIN/FCGR2B/NOD2/GPX1/GPR17/NLRP6	12
BP	GO:0006335	DNA replication-dependent chromatin assembly	12/2932	32/18903	0.00204481	0.0235662	0.0193347	H3C4/H4C8/H4C4/HAT1/H4C11/H4C12/H4C5/H3C10/H3C12/H4C9/H4C3/H3C6	12
BP	GO:1905952	regulation of lipid localization	44/2932	185/18903	0.00204742	0.0235662	0.0193347	PTCH1/PPARG/PRELID1/DBI/PLIN3/LAMTOR1/RETN/MAP2K6/PLTP/TTC39B/CYP19A1/TSPO/PRKCD/ACSL1/PLA2G4A/ATP8A2/NTSR1/FURIN/NKX3-1/CETP/ZC3H12A/ERFE/EHD1/CES1/PLIN5/PCSK9/IL1B/NFKBIA/NR1H3/APOA2/FIS1/PNPLA2/PRKN/CAV1/ABCA13/MSR1/POMC/THBS1/GAL/EGF/PTGES/OSBPL6/IL1A/APOE	44
BP	GO:0014902	myotube differentiation	33/2932	129/18903	0.00205055	0.0235662	0.0193347	NFATC2/FLOT1/CD53/MAPK14/BCL2/SORT1/CDON/STAC3/SHOX2/IL4R/NIBAN2/ADAM12/HDAC4/ADAMTS5/EHD1/GDF15/CCN3/TMEM119/CXCL10/GPX1/XK/MMP14/MYEF2/CACNA1H/MYOF/KLF5/BHLHA15/TRIM72/KEL/RBM38/CEACAM5/IGF1/CXCL9	33
BP	GO:0051928	positive regulation of calcium ion transport	33/2932	129/18903	0.00205055	0.0235662	0.0193347	GSTO1/LILRA5/PLCG1/GPER1/KCNE1/JAK3/CACNB4/TSPO/STAC3/ARRB2/TRPC1/NTSR1/BAK1/CDK5/P2RX1/CCR1/LILRA2/CXCL10/AKAP5/ATP2C2/LGALS3/MS4A1/CAV1/P2RY6/CCL2/CXCL11/CXCL12/STAC/MCHR1/SNCA/RYR2/GJC2/CXCL9	33
BP	GO:0045137	development of primary sexual characteristics	54/2932	238/18903	0.00214482	0.0246042	0.0201863	PLEKHA1/HMGB2/RAB13/GATA3/IDH1/ATM/NUPR1/KCNE1/BCL2/RETN/TNFSF10/CYP19A1/CEBPB/INSL3/IMMP2L/TNFAIP6/ARRB2/H3-3B/LHFPL2/FGF9/H3-3A/BIK/NKX3-1/ANG/DACH1/BASP1/KIT/RARA/PTX3/PRDX4/FOXC1/ADAMTS1/CYP1B1/SDC1/SOX8/MMP14/FZD4/INHBA/MMP2/CSMD1/ASPM/HESX1/UBB/PCYT1B/COL9A3/SFRP1/INHBB/GATA6/DMC1/GATA1/IL1A/PTPRN/BCL2L1/KIF18A	54
BP	GO:0070206	protein trimerization	8/2932	17/18903	0.00215812	0.0246952	0.0202609	ALOX5AP/MLKL/ASIC1/SLC1A5/COL1A2/HLA-G/SLC1A2/ITLN1	8
BP	GO:0030261	chromosome condensation	16/2932	49/18903	0.00216464	0.0246952	0.0202609	GPER1/H1-2/H3-3B/H3-3A/NCAPH2/CDK1/CDCA5/TOP2A/NUSAP1/PLK1/NCAPG/H1-0/H1-6/H1-4/NCAPH/ERN2	16
BP	GO:0035987	endodermal cell differentiation	16/2932	49/18903	0.00216464	0.0246952	0.0202609	ITGA7/MMP9/MMP8/COL5A1/LAMB3/EOMES/COL6A1/MMP14/INHBA/MMP2/POU5F1/COL7A1/GATA6/MIXL1/MESP1/COL4A2	16
BP	GO:0048515	spermatid differentiation	46/2932	196/18903	0.00218433	0.0248371	0.0203774	SLC26A8/CCR6/HMGB2/PTCH1/CFAP44/SPEF2/NECTIN3/TTC12/NECTIN2/ROPN1L/HOOK1/SRPK1/CCDC136/SLC26A6/H3-3B/SEPTIN4/UBE2J1/H3-3A/AGFG1/SYCP3/ARMC12/SPACDR/STRBP/KIT/TMEM119/DPY19L2P2/CFAP97D1/ACRBP/DEFB1/ZMYND15/SLC22A14/SPAG16/DPY19L2/TRIP13/DRC7/FSIP2/SEPTIN14/RNF17/KNL1/TPGS1/OSBP2/KLC3/NPHP1/DMC1/RSPH1/SPAG6	46
BP	GO:0046034	ATP metabolic process	50/2932	217/18903	0.00218506	0.0248371	0.0203774	AK5/NDUFB3/GAPDH/HK3/ATP5MJ/PGK1/NDUFA1/VPS9D1/LDHA/ATP5MF/ATP5PF/NDUFA2/NT5E/ATP5F1C/NDUFB6/NUPR1/NDUFB1/ATP5MG/ENO2/TSPO/ATP5PO/ATP5ME/GALK1/NDUFS5/HKDC1/ALDOA/HDAC4/NDUFA13/PFKFB2/SLC4A4/BAD/ENPP1/HSPA1B/NDUFS4/NDUFA7/HSPA1A/AK4/TGFB1/BPGM/PINK1/ATP8/FIS1/NDUFB7/ENPP3/PID1/ATP6V0C/TREX1/SLC4A1/IGF1/H19	50
BP	GO:0045576	mast cell activation	20/2932	67/18903	0.00221725	0.0251114	0.0206024	S100A12/RASGRP1/PLSCR1/MILR1/FGR/LAT2/FES/NECTIN2/STXBP2/CD300A/IL4R/RAC2/HAVCR1/PTGDR/RABGEF1/LGALS9/KIT/HMOX1/ENPP3/GATA1	20
BP	GO:1901224	positive regulation of NIK/NF-kappaB signaling	20/2932	67/18903	0.00221725	0.0251114	0.0206024	NR3C2/EDAR/NMI/IL18/ILK/RTKN2/MMP8/CD14/IFI35/IL18R1/TRIP6/SPHK1/RBCK1/TLR2/NLRP12/LGALS9/IL1B/EIF2AK2/NOD2/TLR4	20
BP	GO:0032368	regulation of lipid transport	38/2932	155/18903	0.00226534	0.0256094	0.021011	PTCH1/PPARG/PRELID1/DBI/LAMTOR1/RETN/MAP2K6/PLTP/TTC39B/CYP19A1/TSPO/PRKCD/ACSL1/PLA2G4A/ATP8A2/NTSR1/FURIN/NKX3-1/CETP/ERFE/CES1/PCSK9/IL1B/NFKBIA/NR1H3/APOA2/FIS1/PRKN/CAV1/ABCA13/POMC/THBS1/GAL/EGF/PTGES/OSBPL6/IL1A/APOE	38
BP	GO:0040013	negative regulation of locomotion	87/2932	419/18903	0.00227921	0.0257196	0.0211014	EPHA4/NOG/TCAF1/IFITM1/PPARG/DUSP3/GATA3/CCL28/RECK/PTPRK/SYNJ2BP/GCSAM/GADD45A/DPP4/PHLDB2/TIMP1/SEMA5A/BCL2/MIIP/AIF1/ACVRL1/CYP19A1/BST2/SEMA6B/KANK1/SEMA4A/TNFAIP6/ACVR1C/EMILIN2/SAP30/CD300A/TRIB1/MCTP1/TET1/HYAL2/IL24/PDCD10/RRAS/DLG5/DACH1/RABGEF1/BMPR1A/DUSP1/MIR223/CD200R1/CCN3/DLC1/EPHA1/HMOX1/MMP28/IGFBP3/PADI2/NEXMIF/TGFB1/RIN3/DDT/MIR451A/SEMA3B/CYP1B1/MIR21/ATP1B2/ADORA2A/SLAMF8/TMI…	87
BP	GO:0043405	regulation of MAP kinase activity	44/2932	186/18903	0.00228718	0.0257629	0.0211369	EPHA4/S100A12/RASGRP1/PPARG/GBA1/MAP2K6/DNAJA1/PRKCD/CD300A/TRIB1/ADAM9/IRAK3/HYAL2/TRIB2/PDCD10/DUSP1/PDGFD/IL1B/KIT/UCHL1/TGFA/CBS/TGFB1/LOC102724560/MAP3K11/ADAM8/NOD2/TLR4/FZD4/CAV1/ELANE/FLT3/THBS1/SFRP1/EGF/NTRK3/ROBO1/CD24/TENM1/PDGFC/ERN2/DRD4/APOE/SPRY4	44
BP	GO:0034614	cellular response to reactive oxygen species	37/2932	150/18903	0.00229136	0.0257634	0.0211373	TXN/PLEKHA1/IL10/TRPM2/PTPRK/ANXA1/GPR37L1/PRDX1/MMP9/PRKCD/ARG1/PRDX5/CAMKK2/SPHK1/FBLN5/PDCD10/ROMO1/CDK1/PJVK/NME8/PDGFD/NCF1/HGF/MAPK3/PINK1/SIRPA/PYCR1/CYP1B1/GCH1/MPO/MIR21/MMP2/AQP1/TREX1/PRDX2/MET/H19	37
BP	GO:0043409	negative regulation of MAPK cascade	43/2932	181/18903	0.002337	0.0261845	0.0214828	EPHA4/FOXO1/PPARG/DUSP3/GBA1/LILRB4/SYNJ2BP/FKTN/DUSP13/ZMYND11/GPER1/DNAJA1/PRKCD/CD300A/NDRG2/IRAK3/HYAL2/TNIP1/RNF149/ACE2/NLRP12/DUSP1/ATF3/IL1B/UCHL1/PBK/GBP1/PINK1/SIRPA/DACT1/TLR4/MIR21/PRKN/CAV1/KLHL31/NLRP6/SFRP1/EPHB2/PER1/LIF/TIMP3/APOE/SPRY4	43
BP	GO:0033003	regulation of mast cell activation	15/2932	45/18903	0.0023441	0.0261845	0.0214828	PLSCR1/MILR1/FGR/FES/NECTIN2/STXBP2/CD300A/IL4R/RAC2/HAVCR1/RABGEF1/LGALS9/HMOX1/ENPP3/GATA1	15
BP	GO:0032874	positive regulation of stress-activated MAPK cascade	33/2932	130/18903	0.00234689	0.0261845	0.0214828	RASGRP1/MYD88/EDAR/TRAF5/GADD45B/TNIK/GADD45A/NAIP/MMP8/LTBR/PYCARD/SPI1/STK3/SPHK1/WNT7A/GADD45G/PDCD10/TRPV4/ZC3H12A/NCF1/IL1B/FCGR2B/EIF2AK2/CCN2/FLT4/MAP3K11/CCR7/NOD2/TLR4/INAVA/IL26/SEMA3A/IL1A	33
BP	GO:1901987	regulation of cell cycle phase transition	93/2932	453/18903	0.00234966	0.0261845	0.0214828	SMARCD3/FBXO6/ANXA1/MAD2L1BP/ATM/MAPK14/BCL2/MAD2L2/CDKN2C/APBB1/MIIP/CDKN2D/AIF1/LSM10/CACNB4/PKIA/UBE2C/CCND3/MAP3K20/CDKN1A/STXBP4/E2F1/NKX3-1/CDC6/MUC1/DLGAP5/BIRC5/CDC45/PML/DUSP1/SPC25/RRM2/CDK1/AURKB/CDC25C/CDCA5/USP44/CDC20/ANLN/CLSPN/TFDP1/GTSE1/TTK/ATF5/APBB2/KIF14/PSME2/CDC25A/PBK/MIR451A/BUB1/PLK1/SPC24/DTL/ADAMTS1/ESPL1/AURKA/CDK5RAP2/DYRK3/DACT1/OVOL1/H2AX/INHBA/ZWINT/BUB1B/CDT1/NUF…	93
BP	GO:0033273	response to vitamin	24/2932	86/18903	0.00234984	0.0261845	0.0214828	GAS6/FKBP1B/TRIM25/CDKN2D/FES/TSPO/ARG1/ALPL/F5/RARA/ALDH1A2/CBS/LOC102724560/CXCL10/KL/GPX1/TYMS/SFRP1/KANK2/COL1A1/CYP1A1/POSTN/IL1A/HAMP	24
BP	GO:0051091	positive regulation of DNA-binding transcription factor activity	59/2932	266/18903	0.00240828	0.0267878	0.0219778	S100A9/ANXA3/S100A8/MID2/S100A12/AIM2/MYD88/PSMA6/LAMTOR5/IL10/NLRC4/PPARG/CD40LG/TRAF5/CARD16/IL18/FLOT1/JMY/RTKN2/FLOT2/TRIM25/IL18RAP/FOSL1/RPS6KA5/PYCARD/CLU/IL18R1/NTSR1/TRIM21/STK3/IRAK3/SPHK1/RBCK1/NKX3-1/HDAC4/TRIM22/TLR2/NFAM1/HSPA1B/LGALS9/LTF/TFDP1/IL1B/KIT/HSPA1A/EIF2AK2/JAK2/PINK1/TRIM6/ADAM8/NOD2/BEX1/TLR4/FZD4/CAV1/IRAK2/PLPP3/RIGI/TRIM15	59
BP	GO:0070372	regulation of ERK1 and ERK2 cascade	68/2932	315/18903	0.00244657	0.0271652	0.0222874	EPHA4/RASGRP1/DUSP3/GLIPR2/SYNJ2BP/GAS6/TNFAIP8L3/GPER1/MARCO/CEACAM1/ARRB2/PYCARD/NDRG2/GPR183/TNIP1/CAVIN3/ICAM1/ACE2/RRAS/TRPV4/CCR1/ANGPT1/NLRP12/ACKR3/PDGFD/LGALS9/ATF3/IL1B/ACTA2/CCL24/TGFB1/CCN2/MAPK3/GBP1/FLT4/CXCL17/DDT/SIRPA/CCR7/FPR2/NOD2/TLR4/MIR21/INHBA/FGFR2/CCL8/P2RY6/GPBAR1/CCL2/CCL25/NLRP6/AKAP12/EPHA2/EPHB2/IL26/LIF/CCL7/IL1A/CCL23/IGF1/PDGFC/NECAB2/ALOX15/TIMP3/CCL18/APOE/CCL20…	68
BP	GO:0007548	sex differentiation	63/2932	288/18903	0.00249119	0.0275624	0.0226133	PLEKHA1/HMGB2/RAB13/GATA3/IDH1/ATM/NUPR1/KCNE1/BCL2/RETN/TNFSF10/CYP19A1/CEBPB/INSL3/IMMP2L/TNFAIP6/ARRB2/H3-3B/LHFPL2/FGF9/H3-3A/BIK/BAK1/WNT7A/NKX3-1/ANG/DACH1/BMPR1A/BASP1/TIFAB/KIT/RARA/RBP4/PTX3/DCANP1/PRDX4/MERTK/FOXC1/ADAMTS1/CYP1B1/SDC1/SOX8/MMP14/FZD4/INHBA/MMP2/CSMD1/ASPM/HESX1/LHX1/FKBP4/UBB/PCYT1B/COL9A3/SFRP1/INHBB/GATA6/DMC1/GATA1/IL1A/PTPRN/BCL2L1/KIF18A	63
BP	GO:0034599	cellular response to oxidative stress	63/2932	288/18903	0.00249119	0.0275624	0.0226133	TXN/CHD6/PLEKHA1/MGST1/FOXO1/IL10/TRPM2/PTPRK/ANXA1/NOL3/CHCHD2/GPR37L1/PRDX1/BCL2/VNN1/AIF1/MMP9/PRKCD/ARG1/PRDX5/ALOX5/CAMKK2/SPHK1/ALDH3B1/FBLN5/PDCD10/ABCD1/ROMO1/ZC3H12A/PML/HSPA1B/CDK1/PJVK/NME8/PDGFD/NCF1/MSRA/HSPA1A/HMOX1/HGF/MAPK3/JAK2/PINK1/MELK/SIRPA/HSPB1/PYCR1/CYP1B1/GCH1/GPX1/TLR4/MPO/EPAS1/MIR21/PRKN/MMP2/AQP1/ANKRD2/TREX1/PRDX2/SNCA/MET/H19	63
BP	GO:0046330	positive regulation of JNK cascade	26/2932	96/18903	0.00251307	0.0276596	0.0226931	RASGRP1/MYD88/EDAR/TRAF5/GADD45B/TNIK/GADD45A/NAIP/MMP8/LTBR/PYCARD/STK3/WNT7A/GADD45G/TRPV4/NCF1/IL1B/FCGR2B/CCN2/FLT4/MAP3K11/CCR7/NOD2/TLR4/SEMA3A/IL1A	26
BP	GO:0001914	regulation of T cell mediated cytotoxicity	14/2932	41/18903	0.0025133	0.0276596	0.0226931	IL7R/B2M/CEACAM1/FADD/NECTIN2/HLA-A/LILRB1/HLA-H/FCGR2B/CD1C/CD1E/IL23R/SLC22A13/HLA-G	14
BP	GO:0070232	regulation of T cell apoptotic process	14/2932	41/18903	0.0025133	0.0276596	0.0226931	BCL11B/IL7R/ZC3H8/PRELID1/JAK3/BCL2/FADD/CD274/BCL3/LGALS9/ADAM8/LGALS3/IDO1/PTCRA	14
BP	GO:0032720	negative regulation of tumor necrosis factor production	22/2932	77/18903	0.00253989	0.027883	0.0228763	IL10/LILRB4/NLRC3/GAS6/TSPO/ARRB2/IRAK3/BCL3/VSIR/BPI/ZC3H12A/ORM1/LILRB1/LGALS9/RARA/SIRPA/NOD2/TLR4/LILRA4/ACP5/POMC/IGF1	22
BP	GO:0006670	sphingosine metabolic process	9/2932	21/18903	0.00254703	0.027883	0.0228763	GBA1/ACER3/SPHK1/SPTLC2/ASAH2/ASAH2B/SPTLC3/PLPP3/SPTSSB	9
BP	GO:1901739	regulation of myoblast fusion	9/2932	21/18903	0.00254703	0.027883	0.0228763	NFATC2/FLOT1/CD53/MAPK14/IL4R/EHD1/GDF15/CXCL10/CXCL9	9
BP	GO:0045333	cellular respiration	54/2932	240/18903	0.0025966	0.0283758	0.0232807	BLOC1S1/NDUFB3/SLC25A18/NDUFAF1/PRELID1/GBA1/IL10RB/COX6A1/COX7A2/LYRM7/IDH1/COX5B/NDUFA1/ATP5MF/ATP5PF/NDUFA2/CHCHD2/ATP5F1C/NDUFB6/NUPR1/NDUFB1/ATP5MG/NDUFC2-KCTD14/COX6B1/UQCR11/UQCR10/NDUFA4/IMMP2L/COX7B/ATP5PO/ATP5ME/UQCRQ/SCO2/NDUFS5/UQCRH/COX8A/COX6B2/ABCD1/TRPV4/NDUFA13/CHCHD5/UQCRHL/CDK1/NDUFS4/NDUFA7/AK4/PINK1/ATP8/UQCRB/NDUFB7/CCNB1/COX6C/TREX1/SNCA	54
BP	GO:0051702	biological process involved in interaction with symbiont	30/2932	116/18903	0.00267172	0.0290093	0.0238004	LEF1/GAPDH/MYD88/STOM/IFI27/ARG1/CAMP/SAP30/VAPA/HPN/ROMO1/ZC3H12A/LTF/PPIB/PTX3/APOL1/JAK2/GPX1/PF4/PRKN/CCL8/CTSG/ELANE/DEFA1B/DEFA1/NLRP6/AZU1/DEFA5/APOE/SCNN1B	30
BP	GO:0015670	carbon dioxide transport	7/2932	14/18903	0.00268251	0.0290093	0.0238004	RHAG/AQP1/CA2/HBD/HBB/HBG1/HBG2	7
BP	GO:0032688	negative regulation of interferon-beta production	7/2932	14/18903	0.00268251	0.0290093	0.0238004	NMI/NLRC3/PYCARD/PTPRS/LILRB1/RELB/SIRPA	7
BP	GO:0042117	monocyte activation	7/2932	14/18903	0.00268251	0.0290093	0.0238004	LILRB4/DYSF/ADAM9/HYAL2/MT1G/SPACA3/AZU1	7
BP	GO:0043301	negative regulation of leukocyte degranulation	7/2932	14/18903	0.00268251	0.0290093	0.0238004	CEACAM1/SPI1/CD300A/RABGEF1/LGALS9/HMOX1/FCGR2B	7
BP	GO:0043374	CD8-positive, alpha-beta T cell differentiation	7/2932	14/18903	0.00268251	0.0290093	0.0238004	LILRB4/BCL2/ZBTB7B/SOCS1/TOX/IRF1/EOMES	7
BP	GO:0007254	JNK cascade	41/2932	172/18903	0.00272408	0.0294078	0.0241273	RASGRP1/MYD88/EDAR/TRAF5/DUSP3/GADD45B/TNIK/GADD45A/FKTN/ZMYND11/NAIP/DNAJA1/MMP8/LTBR/MAP3K20/PYCARD/TRIB1/STK3/MDFIC/WNT7A/GADD45G/TRPV4/NCF1/IL1B/FCGR2B/CCN2/PINK1/FLT4/MAP3K11/SIRPA/CCR7/NOD2/DACT1/TLR4/PRKN/KLHL31/SFRP1/PER1/SEMA3A/IL1A/MAPK10	41
BP	GO:0019755	one-carbon compound transport	10/2932	25/18903	0.00274713	0.0295032	0.0242056	AQP9/RHAG/AQP10/AQP1/SLC14A1/CA2/HBD/HBB/HBG1/HBG2	10
BP	GO:0051984	positive regulation of chromosome segregation	10/2932	25/18903	0.00274713	0.0295032	0.0242056	MAD2L1BP/CDC6/NCAPH2/BIRC5/AURKB/NCAPG/CDT1/CCNB1/CDCA8/NCAPH	10
BP	GO:0098581	detection of external biotic stimulus	10/2932	25/18903	0.00274713	0.0295032	0.0242056	NLRC4/LY96/NAIP/PGLYRP1/HLA-A/CLEC6A/TLR2/NOD2/TLR4/C4B	10
BP	GO:0001773	myeloid dendritic cell activation	11/2932	29/18903	0.00280577	0.029978	0.0245951	IL10/CAMK4/BATF/CLEC4D/LTBR/PYCARD/SPI1/BATF2/RELB/BATF3/ITGB8	11
BP	GO:0010955	negative regulation of protein processing	11/2932	29/18903	0.00280577	0.029978	0.0245951	CST7/CARD16/CTSZ/NOL3/IL1R2/PLAU/GAS1/NLRP7/CHAC1/THBS1/TMEM98	11
BP	GO:1903318	negative regulation of protein maturation	11/2932	29/18903	0.00280577	0.029978	0.0245951	CST7/CARD16/CTSZ/NOL3/IL1R2/PLAU/GAS1/NLRP7/CHAC1/THBS1/TMEM98	11
BP	GO:2000146	negative regulation of cell motility	80/2932	383/18903	0.00282327	0.0301133	0.0247062	EPHA4/NOG/TCAF1/IFITM1/PPARG/DUSP3/GATA3/CCL28/RECK/PTPRK/SYNJ2BP/GCSAM/GADD45A/DPP4/PHLDB2/TIMP1/BCL2/MIIP/AIF1/ACVRL1/CYP19A1/BST2/KANK1/TNFAIP6/ACVR1C/EMILIN2/SAP30/CD300A/TRIB1/MCTP1/TET1/HYAL2/IL24/PDCD10/RRAS/DLG5/DACH1/RABGEF1/BMPR1A/DUSP1/MIR223/CD200R1/CCN3/DLC1/EPHA1/HMOX1/MMP28/IGFBP3/PADI2/NEXMIF/TGFB1/RIN3/DDT/MIR451A/CYP1B1/MIR21/ATP1B2/SLAMF8/TMIGD3/TAFA5/WNT11/PLXNB3/CCL2/CCL25/HA…	80
BP	GO:0045598	regulation of fat cell differentiation	36/2932	147/18903	0.0029632	0.0315518	0.0258864	FOXO1/PPARG/GATA3/AXIN2/CCDC71L/RORA/GPER1/MAPK14/TFE3/SORT1/CEBPB/NR1D1/ALOX5/CEBPA/ZBTB7B/STK3/TPH1/JDP2/E2F1/ZFP36/METRNL/TRIB2/RORC/TRPV4/ZC3H12A/ENPP1/TGFB1/NOCT/MIR21/PTPRQ/LRP3/TGFB1I1/KLF5/SFRP1/ZBTB7C/MEDAG	36
BP	GO:0001659	temperature homeostasis	42/2932	178/18903	0.00297894	0.0316652	0.0259794	FOXO1/ACVR2B/ALMS1/TRPM2/IL18/DHRS7B/MAP2K6/TFE3/PLAC8/G0S2/CEBPB/NR1D1/FABP5/ACSL1/GRB10/ELOVL3/ZBTB7B/IL18R1/NTSR1/ALPL/IL4R/PCTP/GADD45G/LCN2/EDNRB/ADAMTS5/DBH/IL1B/JAK2/NR1H3/ACHE/GPX1/TLR4/EPAS1/ID1/CAV1/ADIPOR1/TSHR/PTGES/IL1A/PDGFC/FABP4	42
BP	GO:0046006	regulation of activated T cell proliferation	15/2932	46/18903	0.00298722	0.0316991	0.0260072	LILRB4/IL18/JAK3/FADD/ARG1/PYCARD/PDCD1LG2/CD274/IGFBP2/LGALS9/MIR21/IL23R/CD24/IGF2/IGF1	15
BP	GO:0032963	collagen metabolic process	28/2932	107/18903	0.00303048	0.0321035	0.026339	CTSL/CTSB/MMP9/MMP8/ARG1/TGFB3/ARRB2/COL5A1/FURIN/VSIR/MMP27/ADAMTS3/FAP/MMP25/MMP28/CREB3L1/ADAMTS2/TGFB1/CCN2/MIR21/MMP14/INHBA/MMP2/MMP1/COL1A2/PRTN3/COL1A1/ADAMTS14	28
BP	GO:0070304	positive regulation of stress-activated protein kinase signaling cascade	33/2932	132/18903	0.0030512	0.0322681	0.0264741	RASGRP1/MYD88/EDAR/TRAF5/GADD45B/TNIK/GADD45A/NAIP/MMP8/LTBR/PYCARD/SPI1/STK3/SPHK1/WNT7A/GADD45G/PDCD10/TRPV4/ZC3H12A/NCF1/IL1B/FCGR2B/EIF2AK2/CCN2/FLT4/MAP3K11/CCR7/NOD2/TLR4/INAVA/IL26/SEMA3A/IL1A	33
BP	GO:0051346	negative regulation of hydrolase activity	78/2932	373/18903	0.00306271	0.0323125	0.0265105	AMOT/GAPDH/LAMTOR5/CST7/RECK/CSTA/SERPINB1/CARD16/ANXA1/NOL3/SLPI/GAS6/FKBP1B/CSTB/SPOCK2/STYXL1/TIMP1/NAIP/CDKN2D/CTSB/SORT1/BST2/MMP9/SERPINB10/SERPINA1/CARD17P/PRDX5/ARRB2/POR/SERPINB2/PLAUR/IFI16/FURIN/CR1/SIAH2/MICAL1/IFI6/TIMP4/SERPING1/RENBP/BIRC5/TFPI/PLIN5/MIR223/LTF/PTTG1/PTX3/HGF/WFDC1/ANOS1/SPINK8/APOA2/GPX1/MIR21/ADORA2A/LGALS3/NLRP7/ECM1/PROS1/LAMP3/COL4A3/AQP1/C4B/C4A/PLXNB3/COL7A1…	78
BP	GO:0001704	formation of primary germ layer	32/2932	127/18903	0.00306658	0.0323125	0.0265105	NOG/LEF1/ITGA7/TAF10/MMP9/MMP8/COL5A1/BMPR1A/DUSP1/LAMB3/EOMES/SMAD1/FOXC1/ETS2/COL6A1/MMP14/INHBA/MMP2/LHX1/POU5F1/FGFR2/WNT11/COL7A1/SOX7/GATA6/EPHA2/SNAI1/ITGA8/MIXL1/MESP1/COL4A2/TRIM15	32
BP	GO:0002761	regulation of myeloid leukocyte differentiation	31/2932	122/18903	0.00307334	0.0323125	0.0265105	LEF1/C1QC/CAMK4/LILRB4/ZBTB46/CEACAM1/TFE3/FADD/TYROBP/FES/CEBPB/TNFAIP6/LILRB3/IRF7/FSTL3/TRIB1/CCR1/LILRB1/MIR223/GPR137/LTF/RARA/TGFB1/TLR4/PF4/INHBA/IL23R/SFRP1/CLDN18/LIF/FBN1	31
BP	GO:0009060	aerobic respiration	45/2932	194/18903	0.00307615	0.0323125	0.0265105	BLOC1S1/NDUFB3/NDUFAF1/COX6A1/COX7A2/IDH1/COX5B/NDUFA1/ATP5MF/ATP5PF/NDUFA2/CHCHD2/ATP5F1C/NDUFB6/NUPR1/NDUFB1/ATP5MG/NDUFC2-KCTD14/COX6B1/UQCR11/UQCR10/NDUFA4/COX7B/ATP5PO/ATP5ME/UQCRQ/NDUFS5/UQCRH/COX8A/COX6B2/ABCD1/TRPV4/NDUFA13/UQCRHL/CDK1/NDUFS4/NDUFA7/AK4/PINK1/ATP8/UQCRB/NDUFB7/CCNB1/COX6C/SNCA	45
BP	GO:0038093	Fc receptor signaling pathway	17/2932	55/18903	0.00308317	0.0323318	0.0265263	FCGR1A/FCGR1BP/FCER1G/CLEC4D/PLCG1/FGR/PRKCD/CLEC4E/HCK/VAV1/CD200R1/KIT/FCGR2B/LILRA4/PIGR/MS4A2/MAPK10	17
BP	GO:0019065	receptor-mediated endocytosis of virus by host cell	6/2932	11/18903	0.00315869	0.0326835	0.0268149	DPP4/CTSL/RNASEK/ACE2/SIGLEC1/CAV1	6
BP	GO:0019372	lipoxygenase pathway	6/2932	11/18903	0.00315869	0.0326835	0.0268149	ALOX5AP/ALOX5/HPGD/GPX1/ALOX15/ALOX15B	6
BP	GO:0039530	MDA-5 signaling pathway	6/2932	11/18903	0.00315869	0.0326835	0.0268149	IRF7/RIOK3/OAS3/DHX58/IFIH1/DDX60	6
BP	GO:0044771	meiotic cell cycle phase transition	6/2932	11/18903	0.00315869	0.0326835	0.0268149	CCNB2/CDC25C/TTK/CDC25A/OVOL1/NDC80	6
BP	GO:0045628	regulation of T-helper 2 cell differentiation	6/2932	11/18903	0.00315869	0.0326835	0.0268149	ANXA1/IL18/IL4R/BCL6/RARA/HLX	6
BP	GO:0070944	neutrophil-mediated killing of bacterium	6/2932	11/18903	0.00315869	0.0326835	0.0268149	MYD88/CTSG/ELANE/NLRP6/AZU1/SCNN1B	6
BP	GO:0098883	synapse pruning	6/2932	11/18903	0.00315869	0.0326835	0.0268149	EPHA4/C1QC/C1QB/ITGAM/C1QA/CDK5	6
BP	GO:1901731	positive regulation of platelet aggregation	6/2932	11/18903	0.00315869	0.0326835	0.0268149	EMILIN2/JAK2/CTSG/MMRN1/MFSD2B/PDPN	6
BP	GO:0007204	positive regulation of cytosolic calcium ion concentration	47/2932	205/18903	0.00322208	0.0332841	0.0273076	CCR6/ADM/CCL28/C3AR1/CXCR5/CCR4/P2RY10/GNA15/FKBP1B/GPER1/JAK3/BCL2/CCRL2/CACNB4/OPRL1/FPR1/CD55/BAK1/CDK5/EDNRB/PTGDR/TRPV4/CCR1/PLCE1/GPR174/PTGFR/PML/RIC3/ACKR3/PROK2/GPR4/JAK2/CXCR1/S1PR4/CCR7/FIS1/FPR2/CACNA1A/CAV1/CCR8/XCR1/GPR17/MCHR1/GATA1/CD24/RYR2/BDKRB2	47
BP	GO:0033627	cell adhesion mediated by integrin	24/2932	88/18903	0.00326703	0.0336369	0.0275971	ITGA7/ITGA6/ITGAM/DPP4/EXT1/EMILIN2/FERMT3/ADAM9/MUC1/ICAM1/CCN3/ITGA2B/NEXMIF/CYP1B1/PLAU/ITGA9/PLPP3/MMRN1/ITGAD/ITGB8/EPHA2/ITGA8/LIF/FBN1	24
BP	GO:0055072	iron ion homeostasis	24/2932	88/18903	0.00326703	0.0336369	0.0275971	B2M/FBXL5/ATP6V0D1/NEO1/FTL/SLC11A1/HYAL2/LCN2/ERFE/FTH1/RHAG/STEAP3/SLC25A37/LTF/HMOX1/BOLA2B/ABCB6/EPAS1/ALAS2/GLRX5/SLC39A8/TFR2/HAMP/EPB42	24
BP	GO:0008154	actin polymerization or depolymerization	46/2932	200/18903	0.00331615	0.0340766	0.0279578	ARPC3/ABI2/CAPG/MSRB2/SPTBN1/PSTPIP2/SEMA5A/MSRB1/AIF1/PRKCD/CAPZA1/KANK1/ARPC1B/GAS7/PAK3/HCK/PYCARD/VASP/CATIP/MICAL1/TMSB10/PLEK/CDC42EP3/CAPZA2/ANG/ENAH/DBN1/TWF2/CCL24/JAK2/GSN/WASF1/CCR7/DIAPH3/FHDC1/SPTA1/ESAM/MICALL2/CXCL12/TENM1/PLEKHH2/FAM107A/ALOX15/TMOD1/CDC42EP1/DAAM2	46
BP	GO:0048659	smooth muscle cell proliferation	42/2932	179/18903	0.00332068	0.0340766	0.0279578	MYD88/IL10/PPARG/IL18/GPER1/AIF1/MMP9/TGFB3/CYBA/CDKN1A/FGF9/TRIB1/NDRG2/DBH/ACE2/ANG/BMPR1A/PDGFD/MIR223/CCN3/HMOX1/HPGD/IGFBP3/TGFB1/JAK2/ADAMTS1/VIPR2/TLR4/EFEMP2/MIR21/MMP2/FGFR2/TAFA5/ELANE/P2RY6/THBS1/CNN1/NOTCH3/IGF1/APOE/TERT/APOD	42
BP	GO:0002687	positive regulation of leukocyte migration	36/2932	148/18903	0.0033431	0.0340936	0.0279718	CCR6/C3AR1/GAS6/AIF1/FADD/FUT7/PYCARD/SPI1/RAC2/ICAM1/TRPV4/CCR1/GPSM3/SELENOK/PDGFD/LGALS9/CCL24/MDK/MAPK3/CXCL10/ADAM8/CXCL17/CCR7/FPR2/SELP/PGF/MMP14/LGALS3/IL1R1/CCL8/LYVE1/THBS1/CXCL12/CCL7/IL1A/CCL20	36
BP	GO:0002827	positive regulation of T-helper 1 type immune response	8/2932	18/18903	0.00336065	0.0340936	0.0279718	IL18/PLA2G4A/IL18R1/SLC11A1/ARID5A/IL1B/IL1R1/IL23R	8
BP	GO:0002830	positive regulation of type 2 immune response	8/2932	18/18903	0.00336065	0.0340936	0.0279718	GATA3/IL18/IL4R/RARA/NOD2/RSAD2/IDO1/IL33	8
BP	GO:0006957	complement activation, alternative pathway	8/2932	18/18903	0.00336065	0.0340936	0.0279718	CR2/VSIG4/CR1/SUSD4/CFB/CFP/CFD/C8B	8
BP	GO:0010755	regulation of plasminogen activation	8/2932	18/18903	0.00336065	0.0340936	0.0279718	CTSZ/PLGRKT/PLAUR/HPN/F12/CLEC3B/PLAU/THBS1	8
BP	GO:0071360	cellular response to exogenous dsRNA	8/2932	18/18903	0.00336065	0.0340936	0.0279718	FLOT1/CGAS/RALB/IFIT1/CAV1/IFIT1B/IFIH1/RIGI	8
BP	GO:0097067	cellular response to thyroid hormone stimulus	8/2932	18/18903	0.00336065	0.0340936	0.0279718	LMO2/CTSH/CTSL/CTSB/KIT/GAS2L1/INHBB/GATA1	8
BP	GO:0002711	positive regulation of T cell mediated immunity	18/2932	60/18903	0.00339422	0.0343782	0.0282053	GATA3/B2M/IL18/FADD/NECTIN2/CD55/IL18R1/HLA-A/ARID5A/HLA-H/IL1B/CD1C/CD1E/RSAD2/IL1R1/IL23R/SLC22A13/HLA-G	18
BP	GO:0030225	macrophage differentiation	16/2932	51/18903	0.00341732	0.034556	0.0283511	C1QC/GBA1/ZBTB46/FADD/MMP9/CEBPA/SPI1/TRIB1/SOCS1/TLR2/MIR223/TGFB1/CEBPE/PF4/INHBA/LIF	16
BP	GO:0003018	vascular process in circulatory system	59/2932	270/18903	0.00342407	0.0345681	0.0283611	ADM/SLC1A3/ABCB1/SLC2A3/GPER1/CEACAM1/SLC38A1/EXT1/SCPEP1/FABP5/HRH2/ECE1/P2RX1/EDNRB/DBH/ACE2/SMTNL1/TRPV4/SLC4A4/ANGPT1/KCNMA1/SLCO2B1/SLC7A5/MYLK3/ACTA2/CBS/GPR4/TGFB1/SLC29A2/LOC102724560/FOXC1/SLC8A2/GCH1/GPX1/MIR21/ATP1B2/ADORA2A/SLC22A3/SLC1A5/MMP2/SLC22A1/SLC4A3/LRP3/CAV1/ABCG2/SLC2A1/SLC6A9/AKAP12/CPS1/DOCK4/SLC7A2/AZU1/KEL/SLC1A2/BDKRB2/SLC2A4/HBB/APOE/SCNN1B	59
BP	GO:0007229	integrin-mediated signaling pathway	29/2932	113/18903	0.00351467	0.0354254	0.0290644	CD63/BST1/CD177/CD40LG/TXK/ITGA7/ITGA6/ILK/ITGAM/TIMP1/CEACAM1/FGR/DST/HCK/FERMT3/VAV1/ADAM9/ZYX/PLEK/ISG15/LAMA2/ITGA2B/CCN2/ADAMTS1/ITGA9/PLPP3/ITGAD/ITGB8/ITGA8	29
BP	GO:0043299	leukocyte degranulation	22/2932	79/18903	0.00359476	0.0361158	0.0296308	ANXA3/RASGRP1/CD177/MILR1/ITGAM/CEACAM1/FGR/LAT2/FES/STXBP2/HCK/SPI1/CD300A/IL4R/RAC2/PTGDR/RABGEF1/LGALS9/KIT/HMOX1/FCGR2B/GATA1	22
BP	GO:2000514	regulation of CD4-positive, alpha-beta T cell activation	22/2932	79/18903	0.00359476	0.0361158	0.0296308	GATA3/BATF/ANXA1/IL18/IL27/JAK3/CD28/JUNB/CD55/ZBTB7B/IL4R/BCL6/CD274/SOCS1/VSIR/ZC3H12A/TARM1/LGALS9/RARA/HLX/MIR21/IL23R	22
BP	GO:0048247	lymphocyte chemotaxis	19/2932	65/18903	0.00366459	0.0366989	0.0301093	CKLF/HSD3B7/GAS6/GPR183/CXCL16/CCL24/PADI2/CXCL10/ADAM8/CCL8/DEFA1B/CCL2/CCL25/CXCL11/DEFA1/CCL7/CCL23/CCL18/CCL20	19
BP	GO:0080164	regulation of nitric oxide metabolic process	19/2932	65/18903	0.00366459	0.0366989	0.0301093	GLA/IL10/DDAH2/AIF1/TSPO/MMP8/CLU/ZC3H12A/HSP90AA1/IL1B/PTX3/JAK2/SIRPA/TLR4/ASS1/CAV1/ACP5/NOS1AP/HBB	19
BP	GO:0008406	gonad development	52/2932	233/18903	0.00367101	0.0367042	0.0301136	PLEKHA1/HMGB2/RAB13/GATA3/IDH1/ATM/NUPR1/KCNE1/BCL2/RETN/TNFSF10/CYP19A1/CEBPB/INSL3/IMMP2L/TNFAIP6/ARRB2/H3-3B/FGF9/H3-3A/BIK/NKX3-1/ANG/BASP1/KIT/RARA/PTX3/PRDX4/FOXC1/ADAMTS1/CYP1B1/SDC1/SOX8/MMP14/FZD4/INHBA/MMP2/CSMD1/ASPM/HESX1/UBB/PCYT1B/COL9A3/SFRP1/INHBB/GATA6/DMC1/GATA1/IL1A/PTPRN/BCL2L1/KIF18A	52
BP	GO:0030449	regulation of complement activation	9/2932	22/18903	0.0037233	0.0370487	0.0303962	CD59/CR2/CD55/VSIG4/CR1/SUSD4/SERPING1/IL1B/CR1L	9
BP	GO:0035584	calcium-mediated signaling using intracellular calcium source	9/2932	22/18903	0.0037233	0.0370487	0.0303962	TRPM2/FKBP1B/PTGFR/FIS1/DEFB1/SELP/AZU1/RYR2/CCL20	9
BP	GO:0050765	negative regulation of phagocytosis	9/2932	22/18903	0.0037233	0.0370487	0.0303962	ATG3/PLSCR1/SNX3/DYSF/CD300A/TLR2/FCGR2B/SIRPA/PRTN3	9
BP	GO:0048660	regulation of smooth muscle cell proliferation	41/2932	175/18903	0.00378944	0.0376176	0.030863	MYD88/IL10/PPARG/IL18/GPER1/AIF1/MMP9/TGFB3/CYBA/CDKN1A/FGF9/TRIB1/NDRG2/DBH/ACE2/ANG/BMPR1A/PDGFD/MIR223/HMOX1/HPGD/IGFBP3/TGFB1/JAK2/ADAMTS1/VIPR2/TLR4/EFEMP2/MIR21/MMP2/FGFR2/TAFA5/ELANE/P2RY6/THBS1/CNN1/NOTCH3/IGF1/APOE/TERT/APOD	41
BP	GO:0021700	developmental maturation	65/2932	304/18903	0.00379587	0.0376176	0.030863	ADAMTS12/NRCAM/SLC26A8/CD63/CCR6/RAB32/PPARG/GATA3/GBA1/RECK/C1QA/CNGB1/KCNE1/BCL2/EXT1/ACVRL1/SEZ6L/INSL3/ROPN1L/SLC26A6/CEBPA/B4GALT5/H3-3B/GLDN/NTN4/H3-3A/NPR2/EDNRB/FAM20C/SHANK1/ANG/TDRD7/CDC20/LTF/DISC1/ALDH1A2/DCHS1/KIF14/SEZ6/SYBU/AURKA/DEFB1/SCARF1/SLC22A14/SOX8/EPAS1/CNTNAP2/MMP2/NEFL/TRIP13/ZDHHC15/LYL1/BHLHA15/TYMS/GAL/ADAMTS7/DMC1/FAM210B/AGRN/PTPRN/TRIM58/IGF1/BFSP2/EPB42/IL21	65
BP	GO:0043370	regulation of CD4-positive, alpha-beta T cell differentiation	17/2932	56/18903	0.00379859	0.0376176	0.030863	GATA3/BATF/ANXA1/IL18/IL27/JAK3/JUNB/ZBTB7B/IL4R/BCL6/SOCS1/ZC3H12A/LGALS9/RARA/HLX/MIR21/IL23R	17
BP	GO:0043032	positive regulation of macrophage activation	11/2932	30/18903	0.0038175	0.0376849	0.0309183	IL10/MMP8/PLA2G4A/CEBPA/IL4R/TLR4/SPACA3/THBS1/IL1RL1/IL33/HAMP	11
BP	GO:0070498	interleukin-1-mediated signaling pathway	11/2932	30/18903	0.0038175	0.0376849	0.0309183	MYD88/RPS6KA5/IL1RN/IL1R2/IRAK3/ZBP1/IL1B/MAPK3/MIR21/IL1R1/IRAK2	11
BP	GO:0002726	positive regulation of T cell cytokine production	10/2932	26/18903	0.00385108	0.0378366	0.0310427	GATA3/B2M/IL18/CD55/IL18R1/HLA-A/ARID5A/IL1B/RSAD2/IL1R1	10
BP	GO:0035821	modulation of process of another organism	10/2932	26/18903	0.00385108	0.0378366	0.0310427	S100A9/SLPI/GSDMD/LTF/DEFA3/DEFA1B/DEFA4/DEFA1/BCL2L1/DEFA5	10
BP	GO:0046339	diacylglycerol metabolic process	10/2932	26/18903	0.00385108	0.0378366	0.0310427	DGKE/PGS1/PLB1/PLCE1/ANG/DGAT2/APOA2/PNPLA2/DGKK/DGKI	10
BP	GO:0030522	intracellular receptor signaling pathway	58/2932	266/18903	0.00387054	0.0379678	0.0311504	NR3C2/UFD1/PPARG/NR1D2/RNF125/RNF135/RORA/GPER1/MAP2K6/LBH/NR2E1/TADA3/NR1I3/DNAJA1/NR1D1/FABP5/IRF7/TIFA/NKX3-1/RORC/ALPK1/PML/HSPA1B/WBP2/PLIN5/HSPA1A/OASL/RARA/ZNF366/ALDH1A2/PMEPA1/NFKBIA/PADI2/SLC15A3/JAK2/DEFA3/NR1H3/NOD2/TLR4/RIOK3/OAS3/INAVA/DHX58/FKBP4/DEFA1B/TSPAN6/NEDD4/IFIH1/DEFA1/RIGI/SFRP1/KANK2/PER1/DDX60/PRAME/ALOX15/ALOX15B/TRIM15	58
BP	GO:1903035	negative regulation of response to wounding	25/2932	94/18903	0.00390794	0.0382745	0.031402	EPHA4/PHLDB2/CEACAM1/PRKCD/KREMEN1/ALOX5/SERPINB2/PLAUR/AJAP1/PTPRS/RGMA/SERPING1/TFPI/F12/FAP/WFDC1/MDK/TNR/PLAU/PROS1/TAFA5/THBS1/MMRN1/KRT1/APOE	25
BP	GO:0034767	positive regulation of ion transmembrane transport	43/2932	186/18903	0.00399588	0.0390743	0.0320582	AMIGO1/GLRX/GSTO1/TCAF1/ABCB1/PLCG1/COX17/IFNGR2/GPER1/KCNE1/SLC38A1/ANK3/CACNB4/NDUFA4/STAC3/TRPC1/NTSR1/BAK1/CDK5/P2RX1/KCNE5/ACE2/PINK1/CXCL10/AKAP5/MIR21/ATP1B2/KCNJ2/MS4A1/CAV1/P2RY6/CCL2/CXCL11/GAL/STAC/EPHB2/SNCA/RYR2/GJC2/CXCL9/NOS1AP/KCNH2/DRD4	43
BP	GO:0002708	positive regulation of lymphocyte mediated immunity	30/2932	119/18903	0.00402099	0.0392582	0.032209	FCGR1A/RASGRP1/GATA3/B2M/IL18/MAD2L2/CD28/FADD/NECTIN2/TNFSF13/CD55/VAV1/IL18R1/KLRC4/HLA-A/ARID5A/HLA-H/IL1B/TGFB1/CD1C/CD1E/NOD2/RSAD2/IL1R1/KIR2DL4/IL23R/SLC22A13/HLA-G/LAG3/IL21	30
BP	GO:0008608	attachment of spindle microtubules to kinetochore	14/2932	43/18903	0.00412951	0.0400692	0.0328744	BIRC5/SPC25/AURKB/SPC24/NEK2/CDT1/NUF2/CCNB1/KIF2C/CENPE/CDCA8/NDC80/SPAG5/KNL1	14
BP	GO:0042554	superoxide anion generation	14/2932	43/18903	0.00412951	0.0400692	0.0328744	CD177/ITGAM/NCF4/TYROBP/PRKCD/CYBA/SH3PXD2B/NCF1C/NCF1B/NCF1/TGFB1/FPR2/PRG3/ACP5	14
BP	GO:1904037	positive regulation of epithelial cell apoptotic process	14/2932	43/18903	0.00412951	0.0400692	0.0328744	CD40LG/PLCG1/GPER1/ARRB2/BAD/HMOX1/JAK2/GSN/CD248/WNT11/CCL2/THBS1/HLA-G/H19	14
BP	GO:0046456	icosanoid biosynthetic process	18/2932	61/18903	0.00412978	0.0400692	0.0328744	NLRC4/CASP1/ANXA1/NAIP/ALOX5AP/FABP5/ALOX5/PLA2G4A/LTA4H/PYCARD/GGT1/GGTLC2/GGT2P/GGT3P/IL1B/PRG3/GGT5/PTGES	18
BP	GO:0006968	cellular defense response	16/2932	52/18903	0.00423792	0.0409907	0.0336305	CCR6/LY96/CLEC5A/ITK/TYROBP/FOSL1/CD300C/TCIRG1/FCMR/NCF1/ADORA2A/KIR2DL4/LGALS3BP/HLA-G/CXCL9/IL33	16
BP	GO:0010043	response to zinc ion	16/2932	52/18903	0.00423792	0.0409907	0.0336305	S100A8/SLC30A4/TSPO/ARG1/LTA4H/MTF1/MT2A/MT1E/MT1G/MT1F/AANAT/MT1H/MT1X/ASS1/CPS1/HAMP	16
BP	GO:0050679	positive regulation of epithelial cell proliferation	50/2932	224/18903	0.0043087	0.0416107	0.0341391	NOG/AKT3/HMGB2/IL10/PLCG1/SEMA5A/ACVRL1/LRG1/GRN/ARG1/CYBA/ST8SIA1/HPN/STXBP4/FGF9/WNT7A/NME1/BAD/ANG/BMPR1A/AREG/POLD4/HMOX1/MYDGF/CCL24/MDK/TGFA/IQGAP3/EGFL7/FLT4/HLX/NOD2/PGF/MIR21/ECM1/FGFR2/ID1/F3/PLXNB3/GPBAR1/SFRP1/EGF/CXCL12/HTRA1/JCAD/PTPRN/IGF2/IGF1/SCN5A/OSR2	50
BP	GO:0070207	protein homotrimerization	7/2932	15/18903	0.00436107	0.0419863	0.0344472	ALOX5AP/MLKL/ASIC1/SLC1A5/HLA-G/SLC1A2/ITLN1	7
BP	GO:0071639	positive regulation of monocyte chemotactic protein-1 production	7/2932	15/18903	0.00436107	0.0419863	0.0344472	OAS1/TRPV4/SELENOK/LGALS9/IL1B/NOD2/OAS3	7
BP	GO:0031343	positive regulation of cell killing	19/2932	66/18903	0.00441198	0.0424109	0.0347956	RASGRP1/B2M/ITGAM/FADD/TYROBP/NECTIN2/ARG1/SPI1/VAV1/KLRC4/HLA-A/HLA-H/CD1C/CD1E/IL23R/SLC22A13/HLA-G/LAG3/IL21	19
BP	GO:0045766	positive regulation of angiogenesis	43/2932	187/18903	0.00442736	0.0424277	0.0348095	ETS1/ANXA3/AKT3/IL10/ADM/C3AR1/PLCG1/SEMA5A/CTSH/NR2E1/ACVRL1/LRG1/GRN/CAMP/EMILIN2/SPHK1/ADAM12/RRAS/ZC3H12A/IL1B/EPHA1/HMOX1/MYDGF/HGF/CCL24/MDK/SMAD1/MIR451A/HSPB1/CYP1B1/PGF/MIR21/ADM2/ECM1/F3/AQP1/RAPGEF3/THBS1/JCAD/ITGB8/GATA6/IL1A/TERT	43
BP	GO:1904018	positive regulation of vasculature development	43/2932	187/18903	0.00442736	0.0424277	0.0348095	ETS1/ANXA3/AKT3/IL10/ADM/C3AR1/PLCG1/SEMA5A/CTSH/NR2E1/ACVRL1/LRG1/GRN/CAMP/EMILIN2/SPHK1/ADAM12/RRAS/ZC3H12A/IL1B/EPHA1/HMOX1/MYDGF/HGF/CCL24/MDK/SMAD1/MIR451A/HSPB1/CYP1B1/PGF/MIR21/ADM2/ECM1/F3/AQP1/RAPGEF3/THBS1/JCAD/ITGB8/GATA6/IL1A/TERT	43
BP	GO:0001649	osteoblast differentiation	54/2932	246/18903	0.00448189	0.0428016	0.0351162	CLIC1/NOG/LEF1/ACVR2B/PTCH1/IFITM1/PPARG/AXIN2/CLEC5A/ILK/MAPK14/MAP2K6/NR1I3/CEBPB/TNFAIP6/JUNB/CEBPA/CEBPD/H3-3B/SHOX2/FGF9/H3-3A/ALPL/TWIST2/FAM20C/TCIRG1/BMPR1A/AREG/LTF/TMEM119/HGF/IGFBP3/CREB3L1/FHL2/NOCT/SMAD1/BAMBI/ACHE/COL6A1/PDLIM7/HSPE1/SOX8/MIR21/LRP3/FGFR2/WNT11/SFRP1/HEMGN/GLI3/EPHA2/COL1A1/SNAI1/IGF2/IGF1	54
BP	GO:0009595	detection of biotic stimulus	13/2932	39/18903	0.00448698	0.0428016	0.0351162	NLRC4/LY96/NAIP/TSPO/PGLYRP1/HLA-A/CLEC6A/TLR2/DACH1/FAP/NOD2/TLR4/C4B	13
BP	GO:0032570	response to progesterone	13/2932	39/18903	0.00448698	0.0428016	0.0351162	FOSL1/TSPO/TGFB3/TLR2/BAD/WBP2/ACOD1/TGFB1/NR1H3/CYP1B1/CAV1/TYMS/THBS1	13
BP	GO:0045621	positive regulation of lymphocyte differentiation	32/2932	130/18903	0.00449864	0.0428472	0.0351536	LEF1/IL7R/RASGRP1/IL10/TESPA1/GATA3/LILRB4/SMARCD3/ANXA1/IL18/GAS6/VNN1/IL15RA/ZBTB7B/IL4R/BCL6/CR1/SOCS1/VSIR/TOX/PNP/BAD/LGALS9/RARA/MDK/ADAM8/HLX/MIR21/MMP14/IL23R/HLA-G/GLI3	32
BP	GO:0030316	osteoclast differentiation	26/2932	100/18903	0.00458465	0.0435997	0.035771	CAMK4/LILRB4/OSCAR/MAPK14/TFE3/TYROBP/CEBPB/TNFAIP6/LILRB3/JUNB/SBNO2/FSTL3/GPR183/FAM20C/TCIRG1/CCR1/LILRB1/GPR137/LTF/TLR4/IL23R/GPC3/SFRP1/CLDN18/EPHA2/FBN1	26
BP	GO:0070231	T cell apoptotic process	17/2932	57/18903	0.00464527	0.0441088	0.0361887	BCL11B/IL7R/ZC3H8/PRELID1/JAK3/BCL2/FADD/CD274/BAK1/BCL3/LGALS9/ADAM8/LGALS3/IDO1/FAS/PTCRA/GLI3	17
BP	GO:0001974	blood vessel remodeling	15/2932	48/18903	0.00470951	0.0445829	0.0365777	ACVR2B/NOL3/CEACAM1/EXT1/ACVRL1/BAK1/DBH/CBS/TGFB1/FLT4/LOC102724560/FOXC1/EPAS1/LIF/DLL4	15
BP	GO:0006953	acute-phase response	15/2932	48/18903	0.00470951	0.0445829	0.0365777	HP/PLSCR1/CEBPB/SERPINA1/EDNRB/ORM1/ORM2/IL1B/CD163/APOL2/ASS1/PTGES/IL1A/TFR2/HAMP	15
BP	GO:0044703	multi-organism reproductive process	47/2932	209/18903	0.00476234	0.0450146	0.0369318	ADM/RECK/CLIC5/TIMP1/BCL2/SLC38A1/CTSB/FOSL1/MMP9/ARG1/TGFB3/FUT7/ACVR1C/JUNB/H3-3B/H3-3A/ACVR1B/OVGP1/P2RX1/IGFBP2/ACE2/PTGFR/EPN1/LGALS9/IL1B/PRL/RARA/HPGD/ACOD1/CBS/TEAD3/LOC102724560/APOL2/PGF/MIR21/IDO1/MMP2/CSMD1/BSG/ACSL4/DDO/FKBP4/SLC2A1/KLF1/CYP1A1/STOX2/LIF	47
BP	GO:0000280	nuclear division	96/2932	481/18903	0.00478809	0.0451894	0.0370753	SMARCD3/MAD2L1BP/ATM/CHMP5/MAD2L2/CD28/UBE2C/TDRD9/MYBL1/AURKAIP1/SHOC1/MAP9/UBE2S/CHMP2A/SPHK1/PKMYT1/CDC6/CCNA1/DLGAP5/NCAPH2/SYCP3/CKS2/BIRC5/CCNB2/DUSP1/HSPA1B/SPC25/AURKB/CDC25C/CDCA5/KIF4A/USP44/CDC20/ANLN/TDRD12/KIF18B/PIWIL2/IL1B/HSPA1A/TTK/PTTG1/TOP2A/KIF14/TGFA/NUSAP1/KLHDC8B/KIFC1/RNF212/TPX2/CDCA2/BUB1/PLK1/SPC24/ESPL1/AURKA/CDK5RAP2/MYBL2/MKI67/NCAPG/KIF11/NEK2/KIF23/ANKRD31/ZWINT/BU…	96
BP	GO:0033002	muscle cell proliferation	54/2932	247/18903	0.00488963	0.0460779	0.0378042	NOG/MYD88/IL10/PPARG/IL18/GPER1/MAPK14/AIF1/FES/MMP9/TGFB3/CYBA/CDKN1A/FGF9/TRIB1/NDRG2/DBH/ACE2/TGFBR3/ANGPT1/ANG/BMPR1A/CDK1/PDGFD/MIR223/CCN3/HMOX1/RBP4/HGF/HPGD/IGFBP3/TGFB1/JAK2/SMAD1/FOXC1/ADAMTS1/VIPR2/TLR4/EFEMP2/MIR21/MMP2/FGFR2/TAFA5/ELANE/P2RY6/THBS1/GATA6/TENM4/CNN1/NOTCH3/IGF1/APOE/TERT/APOD	54
BP	GO:0001889	liver development	34/2932	141/18903	0.00492729	0.0463626	0.0380378	IL10/PTCH1/ANXA1/TAF10/CEACAM1/CEBPB/ARG1/RPGRIP1L/CEBPA/HPN/UPB1/MPST/TGFBR3/PCSK9/HMOX1/SLC7A5/RARA/HGF/ALDH1A2/MDK/TGFA/HLX/AURKA/E2F8/ASS1/TYMS/CPS1/GATA6/GLI3/CYP1A1/E2F7/MET/HAMP/MESP1	34
BP	GO:0006687	glycosphingolipid metabolic process	18/2932	62/18903	0.00499183	0.0467059	0.0383194	GLA/NEU1/GBA1/GM2A/PRKCD/ST3GAL2/ST8SIA1/B4GALT5/UGCG/B3GALT4/B3GALT2/ST6GALNAC3/KIT/B3GALNT1/ST6GALNAC4/A3GALT2/ITGB8/A4GALT	18
BP	GO:0022617	extracellular matrix disassembly	18/2932	62/18903	0.00499183	0.0467059	0.0383194	FLOT1/DPP4/MMP9/MMP8/SH3PXD2B/HPN/FURIN/ADAMTS5/ADAMTS4/FAP/TGFB1/ADAM8/MMP14/MMP2/MMP1/CTSG/ELANE/PDPN	18
BP	GO:0070228	regulation of lymphocyte apoptotic process	18/2932	62/18903	0.00499183	0.0467059	0.0383194	BCL11B/IL7R/IL10/ZC3H8/PRELID1/JAK3/CD3G/BCL2/FADD/BCL6/CD274/BCL3/AURKB/LGALS9/ADAM8/LGALS3/IDO1/PTCRA	18
BP	GO:0035743	CD4-positive, alpha-beta T cell cytokine production	8/2932	19/18903	0.00502375	0.0467059	0.0383194	GATA3/IL18/ARG1/IL18R1/ARID5A/IL1B/RSAD2/IL1R1	8
BP	GO:0043031	negative regulation of macrophage activation	8/2932	19/18903	0.00502375	0.0467059	0.0383194	CST7/GRN/NR1D1/VSIG4/BPI/ZC3H12A/FCGR2B/NR1H3	8
BP	GO:0045346	regulation of MHC class II biosynthetic process	8/2932	19/18903	0.00502375	0.0467059	0.0383194	IL10/SPI1/RFXANK/JAK2/TLR4/PF4/AZU1/IL33	8
BP	GO:0097202	activation of cysteine-type endopeptidase activity	8/2932	19/18903	0.00502375	0.0467059	0.0383194	NLRC4/FADD/PYCARD/IFI16/BAK1/BAD/ASPH/NLRP6	8
BP	GO:2001185	regulation of CD8-positive, alpha-beta T cell activation	8/2932	19/18903	0.00502375	0.0467059	0.0383194	LILRB4/ZBTB7B/CD274/HLA-A/SOCS1/VSIR/LILRB1/IRF1	8
BP	GO:0009205	purine ribonucleoside triphosphate metabolic process	53/2932	242/18903	0.00507268	0.0470205	0.0385775	AK5/NDUFB3/GAPDH/HK3/ATP5MJ/PGK1/NDUFA1/VPS9D1/LDHA/ATP5MF/ATP5PF/NDUFA2/NT5E/ATP5F1C/NDUFB6/NUPR1/NDUFB1/ATP5MG/ENO2/TSPO/ATP5PO/ATP5ME/GALK1/NDUFS5/HKDC1/ALDOA/HDAC4/NME1/IMPDH1/NDUFA13/PFKFB2/SLC4A4/BAD/ENPP1/HSPA1B/NDUFS4/NDUFA7/HSPA1A/AK4/ENTPD7/TGFB1/BPGM/PINK1/ATP8/FIS1/NDUFB7/ENPP3/PID1/ATP6V0C/TREX1/SLC4A1/IGF1/H19	53
BP	GO:0065004	protein-DNA complex assembly	53/2932	242/18903	0.00507268	0.0470205	0.0385775	KAT6B/GTF2B/H2BC5/HMGB2/H3C4/H2BC21/H2BC12/ZNF827/H4C8/H4C4/TAF10/H2BC18/CENPW/H1-2/H2BC6/PADI4/H3-3B/H3-3A/NAP1L3/TSPYL5/NAP1L2/H4C11/DLGAP5/BAZ1A/H4C12/H4C5/CDC45/HJURP/GMNN/H2BC8/H2BC12L/CENPA/H3C14/H3C15/H2BC4/H3C10/H3C12/H1-0/H2AX/H2BC11/H1-6/CDT1/H1-4/H2BC17/H3C13/CENPE/H4C9/H4C3/H2BC7/RAD51/H3C6/DMC1/CENPF	53
BP	GO:0006690	icosanoid metabolic process	31/2932	126/18903	0.00515326	0.0476964	0.0391321	NLRC4/CASP1/ANXA1/NAIP/ALOX5AP/FABP5/ALOX5/PLA2G4A/LTA4H/CYP2U1/PTGR1/PYCARD/GGT1/GGTLC2/GGT2P/TLR2/TNFRSF1A/GGT3P/IL1B/HPGD/CYP1B1/GPX1/PRG3/CYP2E1/AKR1C1/GGT5/PTGES/CYP1A1/ALOX15/ALOX15B/DPEP1	31
BP	GO:0045840	positive regulation of mitotic nuclear division	14/2932	44/18903	0.00520729	0.0479241	0.0393189	MAD2L1BP/CD28/SPHK1/DLGAP5/IL1B/TGFA/NUSAP1/ESPL1/AURKA/CDT1/EGF/IL1A/IGF2/IGF1	14
BP	GO:0072538	T-helper 17 type immune response	14/2932	44/18903	0.00520729	0.0479241	0.0393189	BATF/RORA/JUNB/ZBTB7B/IL17RA/ARID5A/RORC/CLEC6A/ZC3H12A/ENTPD7/JAK2/MIR21/IL23R/EPHB2	14
BP	GO:0051090	regulation of DNA-binding transcription factor activity	91/2932	454/18903	0.00523119	0.0479241	0.0393189	S100A9/ANXA3/S100A8/MID2/S100A12/AIM2/MYD88/PSMA6/LAMTOR5/IL10/PTCH1/NLRC4/PPARG/CD40LG/TRAF5/CARD16/NLRC3/IL18/FLOT1/GAS6/JMY/NUPR1/RTKN2/MAD2L2/FLOT2/TRIM25/IL18RAP/FOSL1/ADGRG3/RPS6KA5/ARRB2/HCK/PYCARD/SPI1/CLU/IL18R1/NTSR1/TRIM21/TRIB1/STK3/IRAK3/SPHK1/E2F1/BCL3/RBCK1/NKX3-1/CARF/HDAC4/TRIM22/ZC3H12A/TLR2/NFAM1/ENPP1/NLRP12/HSPA1B/PARP10/LGALS9/LTF/TFDP1/IL1B/KIT/HSPA1A/HMOX1/ACOD1/NFKBIA/EIF…	91
BP	GO:0098586	cellular response to virus	29/2932	116/18903	0.00525179	0.0479241	0.0393189	UFD1/IL10RB/RNF125/RNF135/IFNGR2/MAPK14/EXT1/IFNGR1/IRF7/OAS1/IFI6/ZC3H12A/HSP90AA1/LGALS9/OASL/JAK2/CXCL10/TRIM6/MIR21/RIOK3/OAS3/DHX58/TSPAN6/IFIH1/RIGI/DDX60/H19/IL21/TRIM15	29
BP	GO:0002407	dendritic cell chemotaxis	10/2932	27/18903	0.00527813	0.0479241	0.0393189	CCR6/TRPM2/GAS6/SPI1/GPR183/CCR1/LGALS9/CXCR1/CCR7/SLAMF8	10
BP	GO:0032753	positive regulation of interleukin-4 production	10/2932	27/18903	0.00527813	0.0479241	0.0393189	FCER1G/CD40LG/GATA3/CD28/CEBPB/LGALS9/SLC7A5/RARA/PRG2/IL33	10
BP	GO:0042026	protein refolding	10/2932	27/18903	0.00527813	0.0479241	0.0393189	B2M/FKBP1B/HSPA6/DNAJA1/HSPA7/HSP90AA1/HSPA1B/HSPA1A/HSPB1/DNAJA4	10
BP	GO:0044342	type B pancreatic cell proliferation	10/2932	27/18903	0.00527813	0.0479241	0.0393189	SERPINB1/NUPR1/NR1D1/BAD/DACH1/CCN3/IGFBP3/SFRP1/PTPRN/RASGRF1	10
BP	GO:0071280	cellular response to copper ion	10/2932	27/18903	0.00527813	0.0479241	0.0393189	MT2A/MT1E/MT1G/MT1F/AOC1/MT1H/MT1X/AQP1/CYP1A1/SNCA	10
BP	GO:0014066	regulation of phosphatidylinositol 3-kinase signaling	28/2932	111/18903	0.00527989	0.0479241	0.0393189	RASGRP1/NLRC3/IL18/PTPN13/OSM/GPER1/CEACAM1/FGR/CD28/NKX3-1/CEP55/ANGPT1/ERBB3/PDGFD/NCF1/KIT/MYDGF/HGF/JAK2/SELP/PIK3AP1/MIR21/NEDD4/FLT3/EGF/NTRK3/IGF1/PDGFC	28
BP	GO:0036315	cellular response to sterol	9/2932	23/18903	0.00528558	0.0479241	0.0393189	PTCH1/RORA/GRAMD1A/RORC/CES1/GRAMD1C/INHBA/GRAMD1B/INHBB	9
BP	GO:0046519	sphingoid metabolic process	9/2932	23/18903	0.00528558	0.0479241	0.0393189	GBA1/ACER3/SPHK1/SPTLC2/ASAH2/ASAH2B/SPTLC3/PLPP3/SPTSSB	9
BP	GO:0071359	cellular response to dsRNA	9/2932	23/18903	0.00528558	0.0479241	0.0393189	FLOT1/CGAS/RALB/RIOK3/IFIT1/CAV1/IFIT1B/IFIH1/RIGI	9
BP	GO:1901032	negative regulation of response to reactive oxygen species	9/2932	23/18903	0.00528558	0.0479241	0.0393189	TXN/IL10/GPR37L1/HGF/PINK1/PYCR1/MIR21/MET/H19	9
BP	GO:0007286	spermatid development	43/2932	189/18903	0.00541032	0.0489128	0.04013	SLC26A8/CCR6/HMGB2/PTCH1/CFAP44/SPEF2/NECTIN3/TTC12/NECTIN2/ROPN1L/HOOK1/SRPK1/CCDC136/SLC26A6/H3-3B/UBE2J1/H3-3A/AGFG1/SYCP3/ARMC12/SPACDR/STRBP/KIT/DPY19L2P2/CFAP97D1/ACRBP/DEFB1/ZMYND15/SLC22A14/SPAG16/DPY19L2/TRIP13/DRC7/FSIP2/SEPTIN14/RNF17/KNL1/TPGS1/OSBP2/KLC3/DMC1/RSPH1/SPAG6	43
BP	GO:0007565	female pregnancy	43/2932	189/18903	0.00541032	0.0489128	0.04013	ADM/RECK/CLIC5/TIMP1/BCL2/SLC38A1/CTSB/FOSL1/MMP9/ARG1/TGFB3/FUT7/ACVR1C/JUNB/H3-3B/H3-3A/ACVR1B/OVGP1/IGFBP2/ACE2/EPN1/LGALS9/IL1B/PRL/RARA/HPGD/ACOD1/CBS/TEAD3/LOC102724560/APOL2/PGF/MIR21/IDO1/MMP2/CSMD1/BSG/ACSL4/FKBP4/SLC2A1/KLF1/STOX2/LIF	43
BP	GO:0001553	luteinization	6/2932	12/18903	0.00549288	0.0491597	0.0403326	PLEKHA1/RETN/FZD4/INHBA/MMP2/PTPRN	6
BP	GO:0002887	negative regulation of myeloid leukocyte mediated immunity	6/2932	12/18903	0.00549288	0.0491597	0.0403326	SPI1/CD300A/RABGEF1/LGALS9/HMOX1/FCGR2B	6
BP	GO:0002924	negative regulation of humoral immune response mediated by circulating immunoglobulin	6/2932	12/18903	0.00549288	0.0491597	0.0403326	CR2/CD55/CR1/SUSD4/CR1L/FCGR2B	6
BP	GO:0010936	negative regulation of macrophage cytokine production	6/2932	12/18903	0.00549288	0.0491597	0.0403326	TGFB3/IRAK3/TGFB1/PRG2/NOD2/ACP5	6
BP	GO:0010992	ubiquitin recycling	6/2932	12/18903	0.00549288	0.0491597	0.0403326	RNF135/UBE2C/UBE2S/PINK1/TRIM6/PRKN	6
BP	GO:1901748	leukotriene D4 metabolic process	6/2932	12/18903	0.00549288	0.0491597	0.0403326	GGT1/GGTLC2/GGT2P/GGT3P/GGT5/DPEP1	6
BP	GO:2000508	regulation of dendritic cell chemotaxis	6/2932	12/18903	0.00549288	0.0491597	0.0403326	CCR6/GAS6/SPI1/LGALS9/CCR7/SLAMF8	6
BP	GO:1900046	regulation of hemostasis	20/2932	72/18903	0.00551616	0.0492972	0.0404454	ST3GAL4/CEACAM1/PRKCD/EMILIN2/SERPINB2/PLAUR/TPH1/SERPING1/TFPI/F12/FAP/PLAU/PROS1/CAV1/F3/THBS1/PRDX2/EPHB2/KRT1/APOE	20
BP	GO:0043393	regulation of protein binding	45/2932	200/18903	0.00559314	0.0499136	0.0409511	NOG/IL10/SPON1/SMARCD3/LRPAP1/CARD16/CTSZ/B2M/FLOT1/SLPI/DHRS7B/CDON/MMP9/PRKCD/TIAM1/ARRB2/CDKN1A/TRIM21/STK3/RALB/CDK5/RGMA/HDAC4/TGFBR3/ANGPT1/AURKB/PCSK9/DISC1/MAPK3/BAMBI/PLK1/AURKA/DACT1/PRKN/SPTA1/IFIT1/ID1/CAV1/NES/IFIT2/CCL23/WFIKKN1/PTPRF/APOE/TERT	45
CC	GO:0019814	immunoglobulin complex	126/3045	166/19869	2.0188e-68	1.48382e-65	1.27078e-65	IGKV3-7/IGKV3D-7/IGLV2-33/IGKV3D-20/IGHV6-1/IGKV1-12/IGKV1D-12/IGLV3-21/IGLV3-27/IGHG1/IGLV3-10/IGKV1D-17/IGLV2-23/IGKV1D-13/IGLV1-36/IGKV1-13/IGKV2D-24/IGKV3D-15/IGKV1D-39/IGLV2-11/IGHD/IGLV2-14/IGKV3D-11/IGLV3-22/IGKV1-39/IGKV2D-29/IGHV3-72/IGKV1D-33/IGKV3-15/IGHG4/IGKV6D-21/IGLL5/PIGR/IGLC2/IGLV3-25/IGHJ1/IGLV3-1/IGKV3-20/IGLV3-9/IGLV4-69/IGLJ1/IGKV2D-28/IGLC1/IGLV6-57/IGLV2-8/IGLV3-19/IGLV7-4…	126
CC	GO:0009897	external side of plasma membrane	166/3045	462/19869	2.43726e-28	8.95691e-26	7.67094e-26	NRCAM/FCGR1A/AMOT/IL7R/CCR6/SCART1/FCER1G/CD40LG/CXCR5/ITGA7/CCR4/CD59/ITGA6/ANXA1/CLEC4D/ASGR2/B2M/TCN2/FLOT1/NT5E/ABCB1/ITGAM/CD3G/CCRL2/CD28/SLC38A1/CTSB/CD14/CLEC4E/FCN1/ADGRA3/CUBN/IL11RA/KLRC4/IL4R/ECE1/ADAM9/CD5/FOLR3/CA4/PDCD1LG2/CD274/HYAL2/P2RX1/CSF2RA/CLEC6A/ICAM1/ASGR1/CCR1/TGFBR3/LILRB1/ADGRE1/BMPR1A/ACKR3/FCN2/PCSK9/NCAM1/CD200R1/HLA-H/CSF3R/CD163/KIT/LY6G6C/SLC7A5/ITGA2B/CD207/FCGR…	166
CC	GO:0042571	immunoglobulin complex, circulating	54/3045	76/19869	1.46942e-27	3.60009e-25	3.08321e-25	IGHV6-1/IGHG1/IGHD/IGHV3-72/IGHG4/IGLL5/PIGR/IGLC2/IGKV3-20/IGLC1/IGLC6/IGHV2-70D/IGHG3/IGKC/IGHV3-64/IGHV1-45/IGLC3/JCHAIN/IGHV1-69/IGHA2/IGHV5-10-1/IGHV1-69D/IGHV1-18/IGHV1-24/IGHV3-33/IGHV2-70/IGHV3-74/IGHV3-23/IGHV3-30/IGHG2/IGHV3-64D/IGHA1/IGHV3-21/IGHV3-20/IGHV4-39/IGHV3-16/IGHV3-9/IGHV1-69-2/IGHV5-51/IGLC7/IGHV3-49/IGHV1-58/IGHV3-73/IGHV7-4-1/IGHV3-66/IGHV2-5/IGHV4-61/IGHV2-26/IGHV3-13/IGH…	54
CC	GO:0034774	secretory granule lumen	124/3045	322/19869	1.65817e-24	3.04689e-22	2.60944e-22	RNASE2/S100A9/S100A8/DYNLT1/GLA/S100A12/HP/HK3/GYG1/NEU1/PSMA2/GMFG/OSCAR/IDH1/SCCPDH/SERPINB1/CTSZ/CTSA/ACAA1/B2M/CREG1/SRP14/SLPI/GAS6/GM2A/CSTB/QPCT/MAPK14/TIMP1/CTSH/RETN/SRGN/FGR/CTSD/CAP1/HSPA6/PLAC8/TOR4A/S100A11/LRG1/GRN/PRKCD/MMP8/ARG1/SERPINA1/TGFB3/DNASE1L1/PGLYRP1/QSOX1/FABP5/ALOX5/CAMP/FCN1/MVP/FERMT3/PYGL/PYCARD/GNS/CLU/FTL/VPS13A/TUBB4B/GGH/TCN1/S100P/FOLR3/CRISP3/NPC2/TRAPPC1/ALDO…	124
CC	GO:0060205	cytoplasmic vesicle lumen	124/3045	325/19869	4.36352e-24	6.41438e-22	5.49345e-22	RNASE2/S100A9/S100A8/DYNLT1/GLA/S100A12/HP/HK3/GYG1/NEU1/PSMA2/GMFG/OSCAR/IDH1/SCCPDH/SERPINB1/CTSZ/CTSA/ACAA1/B2M/CREG1/SRP14/SLPI/GAS6/GM2A/CSTB/QPCT/MAPK14/TIMP1/CTSH/RETN/SRGN/FGR/CTSD/CAP1/HSPA6/PLAC8/TOR4A/S100A11/LRG1/GRN/PRKCD/MMP8/ARG1/SERPINA1/TGFB3/DNASE1L1/PGLYRP1/QSOX1/FABP5/ALOX5/CAMP/FCN1/MVP/FERMT3/PYGL/PYCARD/GNS/CLU/FTL/VPS13A/TUBB4B/GGH/TCN1/S100P/FOLR3/CRISP3/NPC2/TRAPPC1/ALDO…	124
CC	GO:0070820	tertiary granule	80/3045	164/19869	5.51635e-24	6.75752e-22	5.78733e-22	DSC1/MCEMP1/HP/FCER1G/CD177/CYSTM1/GPR84/OSCAR/IDH1/TRPM2/CD59/CLEC4D/FCAR/B2M/CLEC5A/ITGAM/STOM/CD53/SLC2A3/CSTB/QPCT/ARL8A/LAMTOR1/CTSH/CEACAM1/CTSD/SIGLEC5/LRG1/CD58/DOK3/MMP9/MMP8/SERPINB10/PGLYRP1/CYBA/QSOX1/FPR1/TNFAIP6/CAMP/STXBP2/LTA4H/CD55/LAMTOR2/GGH/TCN1/CD300A/SLC11A1/FOLR3/STBD1/CR1/CRISP3/ALDOA/NBEAL2/CDA/TCIRG1/ORM1/FTH1/GSDMD/CHIT1/TARM1/PPBP/CFP/LTF/PTX3/ADAM8/OLR1/OLFM4/SIRPA/FP…	80
CC	GO:0031983	vesicle lumen	124/3045	327/19869	8.2385e-24	8.65042e-22	7.40846e-22	RNASE2/S100A9/S100A8/DYNLT1/GLA/S100A12/HP/HK3/GYG1/NEU1/PSMA2/GMFG/OSCAR/IDH1/SCCPDH/SERPINB1/CTSZ/CTSA/ACAA1/B2M/CREG1/SRP14/SLPI/GAS6/GM2A/CSTB/QPCT/MAPK14/TIMP1/CTSH/RETN/SRGN/FGR/CTSD/CAP1/HSPA6/PLAC8/TOR4A/S100A11/LRG1/GRN/PRKCD/MMP8/ARG1/SERPINA1/TGFB3/DNASE1L1/PGLYRP1/QSOX1/FABP5/ALOX5/CAMP/FCN1/MVP/FERMT3/PYGL/PYCARD/GNS/CLU/FTL/VPS13A/TUBB4B/GGH/TCN1/S100P/FOLR3/CRISP3/NPC2/TRAPPC1/ALDO…	124
CC	GO:0042581	specific granule	75/3045	160/19869	2.99735e-21	2.75381e-19	2.35844e-19	MCEMP1/ANXA3/HP/BST1/ATP6V1D/CD177/NEU1/C3AR1/GPR84/OSCAR/TRPM2/CTSZ/CD59/CLEC4D/FCAR/ACAA1/B2M/CLEC5A/SLPI/ITGAM/STOM/CD53/SLC2A3/QPCT/CKAP4/LAMTOR1/RETN/CEACAM1/CTSD/AGPAT2/LRG1/MMP8/ARG1/ADGRG3/DNASE1L1/PGLYRP1/CYBA/QSOX1/CAMP/STXBP2/TOM1/LAMTOR2/PLAUR/GGH/TCN1/FOLR3/CRISP3/CEACAM3/ALDH3B1/LCN2/P2RX1/BPI/ORM1/GSDMD/CHIT1/TARM1/CFP/ORM2/LTF/MMP25/PTX3/ADAM8/AOC1/OLR1/OLFM4/FPR2/PLAU/PRG3/ATP8B4…	75
CC	GO:0072562	blood microparticle	63/3045	145/19869	4.59176e-16	3.74994e-14	3.21155e-14	CLIC1/HP/C1QC/C1QB/HPR/STOM/HSPA6/CLU/C1RL/HSPA7/SERPING1/ORM1/CFB/HSPA1B/ORM2/FCN2/HSPA1A/ITGA2B/APOL1/TGFB1/GSN/C1R/APOA2/PROS1/LGALS3BP/IGKV1D-12/IGLV3-21/IGHG1/C4B/C4A/SLC2A1/IGHD/IGKV1-39/IGKV1D-33/IGKV3-15/IGHG4/IGLC2/IGLV3-25/IGKV3-20/IGKV2D-28/IGLC1/IGKV1-17/IGKV4-1/IGHG3/IGKC/IGLV1-47/IGLC3/SLC4A1/JCHAIN/HBD/IGHA2/IGKV1-5/ALB/KRT1/HBB/IGHV3-23/IGHG2/IGHA1/IGKV2-30/APOE/IGHV3-13/IGHV3-7/H…	63
CC	GO:0030667	secretory granule membrane	105/3045	313/19869	5.66787e-16	4.16589e-14	3.56778e-14	DSC1/MCEMP1/CD63/MGST1/BST1/FCER1G/ATP6V1D/CD177/RAB24/CYSTM1/C3AR1/GPR84/TRPM2/CD59/CLEC4D/FCAR/CLEC5A/BRI3/ITGAM/STOM/CD53/SLC2A3/ARL8A/CKAP4/LAMTOR1/VNN1/CEACAM1/AGPAT2/SELL/SIGLEC5/FLOT2/TYROBP/BST2/CD58/DOK3/SERPINB10/ADGRG3/CD14/CYBA/FPR1/FABP5/CCDC136/LILRB3/RHOG/CD55/TOM1/LAMTOR2/PLAUR/VAPA/SIGLEC9/LHFPL2/CD300A/SLC11A1/CA4/STBD1/CR1/CEACAM3/HLA-C/ALDH3B1/RAB4B/P2RX1/NBEAL2/DBH/TCIRG1/TLR…	105
CC	GO:1904724	tertiary granule lumen	33/3045	55/19869	4.43946e-14	2.96637e-12	2.54048e-12	HP/OSCAR/IDH1/B2M/CSTB/QPCT/CTSH/CTSD/LRG1/MMP9/MMP8/PGLYRP1/QSOX1/TNFAIP6/CAMP/LTA4H/GGH/TCN1/FOLR3/CRISP3/ALDOA/CDA/ORM1/FTH1/GSDMD/CHIT1/PPBP/CFP/LTF/PTX3/OLFM4/PRG3/HBB	33
CC	GO:0035580	specific granule lumen	35/3045	62/19869	9.87583e-14	6.04895e-12	5.18048e-12	HP/NEU1/OSCAR/CTSZ/ACAA1/B2M/SLPI/QPCT/RETN/CTSD/LRG1/MMP8/ARG1/DNASE1L1/PGLYRP1/QSOX1/CAMP/GGH/TCN1/FOLR3/CRISP3/LCN2/BPI/ORM1/GSDMD/CHIT1/CFP/ORM2/LTF/PTX3/AOC1/OLFM4/PRG3/ELANE/DEFA4	35
CC	GO:0062023	collagen-containing extracellular matrix	126/3045	433/19869	1.40611e-13	7.94994e-12	6.80854e-12	S100A9/S100A8/S100A6/C1QC/C1QB/SPON1/PLSCR1/SERPINB1/LGALS1/CTSZ/ANXA1/SLPI/CSTB/NTNG2/C1QA/TIMP1/CTSH/CTSD/CTSL/CTSB/CDON/MMP9/MMP8/SERPINA1/TGFB3/DST/FCN1/EMILIN2/CLU/COL5A1/COL19A1/NTN4/S100A4/ADAMTSL4/FBLN5/FBLN2/CD151/ICAM1/ADAMTS3/ADAMTS5/SERPING1/ORM1/COL17A1/ANGPT1/ANG/COL6A2/HSP90AA1/ADAMTS4/F12/GDF15/CFP/ORM2/FCN2/LGALS9/NCAM1/CCN3/LAMA2/ADAMTS10/MMP28/ACTA2/LAMB3/MDK/ADAMTS2/SDC3/TNR/T…	126
CC	GO:0101002	ficolin-1-rich granule	69/3045	185/19869	1.8954e-13	9.95083e-12	8.52216e-12	DSC1/DYNLT1/HK3/FCER1G/GYG1/PSMA2/GMFG/IDH1/TRPM2/CTSZ/CLEC4D/FCAR/SRP14/SLC2A3/CSTB/QPCT/ARL8A/LAMTOR1/MAPK14/CTSH/CTSD/HSPA6/SIGLEC5/CTSB/LRG1/CD58/DOK3/MMP9/SERPINB10/SERPINA1/FPR1/TNFAIP6/ALOX5/FCN1/MVP/LTA4H/CD55/PYGL/GNS/CD300A/SLC11A1/PLEKHO2/STBD1/CR1/ALDOA/NBEAL2/CDA/IMPDH1/PNP/TCIRG1/FTH1/GSDMD/HSP90AA1/HSPA1B/HSPA1A/PRDX4/GSN/ADAM8/SIRPA/PRG2/FPR2/MGAM/SIGLEC14/ATP6V0C/LGALS3/CFD/NFASC…	69
CC	GO:0042101	T cell receptor complex	56/3045	147/19869	1.30391e-11	5.76179e-10	4.93455e-10	CD3G/TRBJ1-4/TRAV26-2/TRAV8-3/TRAV9-2/TRBJ1-6/TRAV17/TRBV3-1/TRAV29DV5/TRAV20/TRAV13-1/TRBJ1-3/TRAV41/TRAV23DV6/TRAV36DV7/TRAV8-6/TRAV12-3/TRBV23-1/TRBV6-4/TRAV24/TRAV26-1/TRAV16/TRAV12-1/TRBV19/TRAV19/TRBV20-1/TRAV2/TRAV13-2/TRAV8-1/TRAV12-2/TRAV4/TRAV5/TRGV9/TRAV1-2/TRAV6/TRAV8-2/TRBV5-1/TRAV3/TRAV38-2DV8/TRAV25/TRAV8-4/TRBV2/TRBV6-1/TRBV18/TRAV21/TRAV1-1/TRBV4-2/TRAJ3/TRAV10/TRBV6-3/TRAV38-1/T…	56
CC	GO:0005766	primary lysosome	58/3045	155/19869	1.33266e-11	5.76179e-10	4.93455e-10	RNASE2/CD63/GLA/MGST1/C3AR1/CTSA/CREG1/BRI3/GM2A/STOM/ARL8A/CKAP4/LAMTOR1/VNN1/RETN/CAP1/PLAC8/BST2/GRN/PRKCD/ARG1/FPR1/FABP5/STXBP2/TOM1/PYCARD/VAPA/GNS/FTL/TUBB4B/GGH/NPC2/TRAPPC1/BPI/IMPDH1/NFAM1/GCA/CYB5R3/ORM2/HLA-H/PADI2/RNASE3/DEFA3/NAPRT/MPO/ATP6V0C/CEACAM8/CTSG/ELANE/ABCA13/DEFA1B/CEACAM6/PRTN3/DEFA4/DEFA1/PIGR/AZU1/TXNDC5	58
CC	GO:0042582	azurophil granule	58/3045	155/19869	1.33266e-11	5.76179e-10	4.93455e-10	RNASE2/CD63/GLA/MGST1/C3AR1/CTSA/CREG1/BRI3/GM2A/STOM/ARL8A/CKAP4/LAMTOR1/VNN1/RETN/CAP1/PLAC8/BST2/GRN/PRKCD/ARG1/FPR1/FABP5/STXBP2/TOM1/PYCARD/VAPA/GNS/FTL/TUBB4B/GGH/NPC2/TRAPPC1/BPI/IMPDH1/NFAM1/GCA/CYB5R3/ORM2/HLA-H/PADI2/RNASE3/DEFA3/NAPRT/MPO/ATP6V0C/CEACAM8/CTSG/ELANE/ABCA13/DEFA1B/CEACAM6/PRTN3/DEFA4/DEFA1/PIGR/AZU1/TXNDC5	58
CC	GO:0070821	tertiary granule membrane	34/3045	73/19869	2.57311e-10	1.05069e-08	8.99837e-09	MCEMP1/FCER1G/CD177/CYSTM1/GPR84/TRPM2/CD59/CLEC4D/FCAR/CLEC5A/ITGAM/STOM/CD53/SLC2A3/CEACAM1/SIGLEC5/CYBA/LAMTOR2/CD300A/SLC11A1/STBD1/NBEAL2/TARM1/ADAM8/OLR1/SIRPA/FPR2/PLAU/MGAM/SIGLEC14/ATP8B4/ATP6V0C/FRMPD3/CEACAM8	34
CC	GO:0035579	specific granule membrane	38/3045	91/19869	1.17717e-09	4.5538e-08	3.9e-08	MCEMP1/BST1/ATP6V1D/CD177/C3AR1/GPR84/TRPM2/CD59/CLEC4D/FCAR/CLEC5A/ITGAM/STOM/CD53/SLC2A3/CKAP4/LAMTOR1/CEACAM1/AGPAT2/ADGRG3/CYBA/TOM1/LAMTOR2/PLAUR/CEACAM3/ALDH3B1/P2RX1/TARM1/MMP25/ADAM8/OLR1/FPR2/PLAU/ATP8B4/CEACAM8/MS4A3/SLC27A2/SLC2A5	38
CC	GO:0071735	IgG immunoglobulin complex	10/3045	10/19869	7.05784e-09	2.47024e-07	2.11558e-07	IGHG1/IGHG4/IGLC1/IGLC6/IGHG3/IGKC/IGLC3/IGHG2/IGHA1/IGLC7	10
CC	GO:0071745	IgA immunoglobulin complex	10/3045	10/19869	7.05784e-09	2.47024e-07	2.11558e-07	PIGR/IGKV3-20/IGLC1/IGLC6/IGKC/IGLC3/JCHAIN/IGHA2/IGHA1/IGLC7	10
CC	GO:0101003	ficolin-1-rich granule membrane	28/3045	61/19869	1.44544e-08	4.82908e-07	4.13576e-07	DSC1/FCER1G/TRPM2/CLEC4D/FCAR/SLC2A3/ARL8A/LAMTOR1/SIGLEC5/CD58/DOK3/SERPINB10/FPR1/CD55/CD300A/SLC11A1/STBD1/CR1/NBEAL2/TCIRG1/ADAM8/SIRPA/FPR2/MGAM/SIGLEC14/ATP6V0C/LGALS3/NFASC	28
CC	GO:0035578	azurophil granule lumen	36/3045	91/19869	1.78397e-08	5.70093e-07	4.88243e-07	RNASE2/GLA/CTSA/CREG1/GM2A/RETN/CAP1/PLAC8/GRN/PRKCD/ARG1/FABP5/PYCARD/GNS/FTL/TUBB4B/GGH/NPC2/TRAPPC1/BPI/IMPDH1/GCA/CYB5R3/ORM2/PADI2/RNASE3/DEFA3/NAPRT/MPO/CTSG/ELANE/DEFA1B/PRTN3/DEFA1/AZU1/TXNDC5	36
CC	GO:0000786	nucleosome	46/3045	133/19869	2.95397e-08	9.04655e-07	7.7477e-07	KAT6B/H2AC19/H2AC18/H2BC5/H3C4/H2BC21/H2BC12/H2AC7/H4C8/H4C4/H2AC20/H2BC18/H2AJ/H2AC8/ZNHIT1/H1-2/H2BC6/H3-5/H3-3B/H3-3A/H2AC13/H4C11/H4C12/H4C5/H2AC6/H2BC8/H2BC12L/CENPA/H3C14/H3C15/H2BC4/H3C10/H3C12/H2AC17/H1-0/H2AX/H2BC11/H1-6/H1-4/H2BC17/H2AC16/H3C13/H4C9/H4C3/H2BC7/H3C6	46
CC	GO:0044815	DNA packaging complex	56/3045	178/19869	4.53379e-08	1.33293e-06	1.14156e-06	KAT6B/H2AC19/H2AC18/H2BC5/H3C4/H2BC21/H2BC12/H2AC7/H4C8/H4C4/H2AC20/H2BC18/H2AJ/H2AC8/ZNHIT1/H1-2/H2BC6/H3-5/H3-3B/H3-3A/H2AC13/H4C11/NCAPH2/H4C12/H4C5/SPC25/H2AC6/H2BC8/H2BC12L/CENPA/H3C14/H3C15/SPC24/H2BC4/H3C10/H3C12/H2AC17/NCAPG/H1-0/H2AX/ZWINT/H2BC11/H1-6/NUF2/H1-4/H2BC17/H2AC16/H3C13/H4C9/H4C3/H2BC7/NDC80/KNL1/NCAPH/H3C6/TERT	56
CC	GO:0005775	vacuolar lumen	55/3045	176/19869	7.67753e-08	2.17038e-06	1.85877e-06	RNASE2/GLA/GYG1/IFI30/NEU1/GBA1/CTSA/CREG1/TCN2/GM2A/RETN/CTSD/CAP1/PLAC8/CTSL/CTSB/NSG1/GRN/PRKCD/ARG1/FABP5/PYCARD/GNS/FTL/TUBB4B/GGH/CUBN/NPC2/TRAPPC1/BPI/IMPDH1/GCA/HSP90AA1/CYB5R3/ORM2/PADI2/SDC3/RNASE3/NSG2/DEFA3/CD1E/GPC4/SDC1/NAPRT/MPO/CTSG/ELANE/DEFA1B/PRTN3/DEFA1/GPC3/AZU1/SDC2/TXNDC5/AGRN	55
CC	GO:0030139	endocytic vesicle	90/3045	343/19869	1.0223e-07	2.78292e-06	2.38337e-06	FCGR1A/AMOT/ANXA3/PIK3C2B/FCGR1BP/IL7R/HP/ATP6V0E1/RAB32/PTCH1/RAB13/RAB24/VPS9D1/RAB20/B2M/SNX3/DPP4/MARCO/CD3G/CTSL/FLOT2/NCF4/DYSF/PGLYRP1/CYBA/CLEC4E/ATP6V0D1/ARRB2/STXBP4/UBC/CUBN/SLC11A1/TAP1/AP2S1/ATP6V0B/SPHK1/CLTB/STAB1/RAC2/WNT7A/HYAL2/HLA-C/HLA-A/ZYX/ACE2/TCIRG1/TLR2/PLEKHG5/RAB31/EHD1/HSP90AA1/RABGEF1/UNC93B1/CLTCL1/RAB43/AREG/LTF/HLA-H/CSF3R/NCF1/MYO6/CD163/CD207/MCOLN1/ENTPD7/TGFA/R…	90
CC	GO:0098802	plasma membrane signaling receptor complex	85/3045	319/19869	1.11133e-07	2.91724e-06	2.49841e-06	ACVR2B/TRAF5/IL10RB/ITGA7/ITGA6/B2M/ITGAM/CD3G/TRBJ1-4/ACVRL1/IL18RAP/TRAV26-2/ACVR1C/IL18R1/TRAV8-3/TRAV9-2/TRBJ1-6/ACVR1B/TRAV17/TRBV3-1/TRAV29DV5/CSF2RA/TRAV20/TRAV13-1/TRBJ1-3/TRAV41/TLR2/TRAV23DV6/BMPR1A/TRAV36DV7/TRAV8-6/ERBB3/TRAV12-3/TRBV23-1/TRBV6-4/TRAV24/TRAV26-1/TRAV16/GP1BB/ITGA2B/TRAV12-1/TRBV19/TRAV19/TRBV20-1/JAK2/TRAV2/TRAV13-2/TRAV8-1/TRAV12-2/TRAV4/TRAV5/TRGV9/TRAV1-2/TRAV6/TRA…	85
CC	GO:1904813	ficolin-1-rich granule lumen	41/3045	124/19869	6.45903e-07	1.63703e-05	1.402e-05	DYNLT1/HK3/GYG1/PSMA2/GMFG/IDH1/CTSZ/SRP14/CSTB/QPCT/MAPK14/CTSH/CTSD/HSPA6/CTSB/LRG1/MMP9/SERPINA1/TNFAIP6/ALOX5/FCN1/MVP/LTA4H/PYGL/GNS/PLEKHO2/ALDOA/CDA/IMPDH1/PNP/FTH1/GSDMD/HSP90AA1/HSPA1B/HSPA1A/PRDX4/GSN/PRG2/CFD/KRT1/HBB	41
CC	GO:0031093	platelet alpha granule lumen	27/3045	67/19869	6.81813e-07	1.67044e-05	1.43061e-05	SCCPDH/GAS6/TIMP1/SRGN/TOR4A/SERPINA1/TGFB3/QSOX1/FERMT3/CLU/ALDOA/SERPING1/ORM1/F5/PPBP/ORM2/HGF/TGFB1/PF4/PROS1/CFD/THBS1/EGF/MMRN1/IGF2/IGF1/ALB	27
CC	GO:0031091	platelet alpha granule	33/3045	91/19869	7.51735e-07	1.78234e-05	1.52644e-05	SCCPDH/GAS6/TIMP1/SRGN/TOR4A/SERPINA1/TGFB3/QSOX1/FERMT3/CLU/LHFPL2/ALDOA/SERPING1/ORM1/F5/PPBP/ORM2/ITGA2B/HGF/TGFB1/TREML1/LY6G6F/SELP/PF4/PROS1/CFD/THBS1/EGF/MMRN1/SNCA/IGF2/IGF1/ALB	33
CC	GO:0005788	endoplasmic reticulum lumen	79/3045	312/19869	2.70445e-06	6.21178e-05	5.31994e-05	EDEM2/SPON1/MMP24-AS1-EDEM2/LRPAP1/LGALS1/CTSZ/DBI/B2M/GAS6/SIL1/CKAP4/TIMP1/IL27/TOR4A/NUCB1/SERPINA1/QSOX1/PLAUR/CLU/SHISA5/COL5A1/FSTL3/COL19A1/DNAJB11/COLGALT2/ADAMTSL4/WNT7A/FAM20C/ARSK/ADAMTS5/ACE2/SERPING1/MANF/COL17A1/F5/COL6A2/CES1/CFP/PDGFD/PCSK9/TOR1B/PPIB/MYDGF/APOL1/IGFBP3/PRSS23/MAPK3/SDF2L1/COL6A1/APOA2/CDH2/MXRA8/PNPLA2/COL23A1/COL13A1/P4HA2/COL4A3/MZB1/C4A/COL1A2/COL7A1/FLT3/GPC3…	79
CC	GO:0045178	basal part of cell	69/3045	272/19869	1.05254e-05	0.000234428	0.000200771	SLC16A10/VSIG1/MPZ/SYNJ2BP/ANXA1/FLOT1/SLC1A3/PHLDB2/CEACAM1/NAIP/SLC38A1/FLOT2/ANK3/ST14/SLC51A/DST/SLC16A3/ARRB2/SLC26A6/SLC4A7/AJAP1/SLC4A10/HOMER3/MAP7/SLC9A4/AQP9/BEST1/SLC4A4/SHROOM4/HSP90AA1/ENPP1/ERBB3/FAP/SLC7A5/HPGD/OTOF/TGFA/BSND/SLC29A2/CLRN1/AQP10/SLC8A2/NOD2/CDH2/ATP2C2/SLC1A5/SLC22A1/BSG/LIN7A/RAB17/ITGA9/AQP1/P2RY6/SLC2A1/PLPP3/SLC6A9/SLC4A9/SLC39A8/SLC14A1/ALPK2/TSHR/SLC4A1/PDPN/…	69
CC	GO:0009925	basal plasma membrane	65/3045	254/19869	1.38696e-05	0.000299827	0.00025678	SLC16A10/VSIG1/MPZ/SYNJ2BP/ANXA1/FLOT1/SLC1A3/CEACAM1/NAIP/SLC38A1/FLOT2/ANK3/ST14/SLC51A/DST/SLC16A3/ARRB2/SLC26A6/SLC4A7/AJAP1/SLC4A10/MAP7/SLC9A4/AQP9/BEST1/SLC4A4/SHROOM4/HSP90AA1/ENPP1/ERBB3/SLC7A5/HPGD/OTOF/TGFA/BSND/SLC29A2/AQP10/SLC8A2/NOD2/CDH2/ATP2C2/SLC1A5/SLC22A1/BSG/LIN7A/RAB17/ITGA9/AQP1/P2RY6/SLC2A1/PLPP3/SLC6A9/SLC4A9/SLC39A8/SLC14A1/ALPK2/TSHR/SLC4A1/PDPN/EPCAM/MET/TACSTD2/ANK1/C…	65
CC	GO:0032993	protein-DNA complex	59/3045	225/19869	1.55448e-05	0.00032644	0.000279572	KAT6B/LEF1/H2AC19/GTF2B/H2AC18/H2BC5/H3C4/H2BC21/H2BC12/H2AC7/H4C8/H4C4/H2AC20/TAF10/H2BC18/NUPR1/H2AJ/NFE2/H2AC8/ZNHIT1/H1-2/H2BC6/H3-5/H3-3B/H3-3A/H2AC13/H4C11/H4C12/H4C5/CDC45/H2AC6/H2BC8/H2BC12L/POLD4/CENPA/H3C14/GINS2/H3C15/H2BC4/H3C10/H3C12/H2AC17/H1-0/H2AX/H2BC11/H1-6/H1-4/H2BC17/H2AC16/H3C13/H4C9/H4C3/H2BC7/TREX1/H3C6/RPA4/GATA1/GINS1/TERT	59
CC	GO:0098800	inner mitochondrial membrane protein complex	44/3045	158/19869	3.84405e-05	0.000784827	0.000672147	NDUFB3/NDUFAF1/AGK/ATP5MJ/COX6A1/COX7A2/COX5B/NDUFA1/ATP5MF/ATP5PF/NDUFA2/ATP5F1C/NDUFB6/NDUFB1/MTX1/ATP5MG/NDUFC2-KCTD14/COX6B1/UQCR11/UQCR10/GRPEL2/NDUFA4/IMMP2L/MTX3/TIMM17B/COX7B/ATP5PO/ATP5ME/UQCRQ/TIMM10/NDUFS5/UQCRH/COX8A/ROMO1/NDUFA13/UQCRHL/NDUFS4/NDUFA7/MICU3/ATP8/UQCRB/C15orf48/NDUFB7/COX6C	44
CC	GO:0035577	azurophil granule membrane	21/3045	58/19869	7.67637e-05	0.0015249	0.00130596	CD63/MGST1/C3AR1/BRI3/STOM/ARL8A/CKAP4/LAMTOR1/VNN1/BST2/FPR1/TOM1/VAPA/NFAM1/HLA-H/ATP6V0C/CEACAM8/ABCA13/CEACAM6/PIGR/AZU1	21
CC	GO:0005833	hemoglobin complex	8/3045	12/19869	8.34685e-05	0.00161446	0.00138266	CYB5R3/AHSP/HBM/HBD/HBB/HBQ1/HBG1/HBG2	8
CC	GO:0045121	membrane raft	76/3045	326/19869	8.75193e-05	0.0016494	0.00141259	MS4A4A/UNC5A/LAMTOR5/PTCH1/CD177/PLSCR1/PGK1/AHNAK/GPM6B/FLOT1/ITGAM/DPP4/STOM/LAMTOR1/KCNE1/RGS19/CTSD/LAT2/FLOT2/FADD/BST2/ENO2/CD14/HCK/CD55/LAMTOR2/KCNA3/NTSR1/RGMB/ERLIN1/EFHD2/FURIN/CR1/HYAL2/P2RX1/CAVIN3/EDNRB/ICAM1/ACE2/TLR2/NFAM1/TNFRSF1A/ANGPT1/SELPLG/KCNMA1/BMPR1A/TFPI/ASAH2/DLC1/HMOX1/TNR/MAPK3/JAK2/OLR1/STOML1/AKAP5/CDH2/BSG/FAS/MS4A1/CAV1/MYOF/ABCG2/SLC2A1/PRTN3/PLPP3/EFNA5/SLC1A2/C…	76
CC	GO:0043505	CENP-A containing nucleosome	10/3045	18/19869	9.39051e-05	0.00168342	0.00144173	H4C8/H4C4/H2AC8/H4C11/H4C12/H4C5/CENPA/H2BC11/H4C9/H4C3	10
CC	GO:0061638	CENP-A containing chromatin	10/3045	18/19869	9.39051e-05	0.00168342	0.00144173	H4C8/H4C4/H2AC8/H4C11/H4C12/H4C5/CENPA/H2BC11/H4C9/H4C3	10
CC	GO:0098857	membrane microdomain	76/3045	327/19869	9.71983e-05	0.00170097	0.00145676	MS4A4A/UNC5A/LAMTOR5/PTCH1/CD177/PLSCR1/PGK1/AHNAK/GPM6B/FLOT1/ITGAM/DPP4/STOM/LAMTOR1/KCNE1/RGS19/CTSD/LAT2/FLOT2/FADD/BST2/ENO2/CD14/HCK/CD55/LAMTOR2/KCNA3/NTSR1/RGMB/ERLIN1/EFHD2/FURIN/CR1/HYAL2/P2RX1/CAVIN3/EDNRB/ICAM1/ACE2/TLR2/NFAM1/TNFRSF1A/ANGPT1/SELPLG/KCNMA1/BMPR1A/TFPI/ASAH2/DLC1/HMOX1/TNR/MAPK3/JAK2/OLR1/STOML1/AKAP5/CDH2/BSG/FAS/MS4A1/CAV1/MYOF/ABCG2/SLC2A1/PRTN3/PLPP3/EFNA5/SLC1A2/C…	76
CC	GO:0016323	basolateral plasma membrane	57/3045	229/19869	0.000103377	0.00176702	0.00151332	SLC16A10/VSIG1/MPZ/SYNJ2BP/ANXA1/FLOT1/NAIP/SLC38A1/FLOT2/ANK3/ST14/SLC51A/SLC16A3/ARRB2/SLC26A6/SLC4A7/AJAP1/SLC4A10/MAP7/SLC9A4/AQP9/BEST1/SLC4A4/HSP90AA1/ENPP1/ERBB3/SLC7A5/HPGD/OTOF/TGFA/BSND/SLC29A2/AQP10/SLC8A2/NOD2/CDH2/ATP2C2/SLC22A1/BSG/LIN7A/RAB17/AQP1/P2RY6/SLC2A1/PLPP3/SLC6A9/SLC4A9/SLC39A8/SLC14A1/ALPK2/TSHR/SLC4A1/PDPN/EPCAM/ANK1/CEACAM5/LPO	57
CC	GO:0030666	endocytic vesicle membrane	50/3045	194/19869	0.000106678	0.00178201	0.00152616	FCGR1A/ANXA3/FCGR1BP/IL7R/ATP6V0E1/RAB32/PTCH1/RAB20/B2M/MARCO/CD3G/CYBA/CLEC4E/ATP6V0D1/UBC/SLC11A1/TAP1/AP2S1/ATP6V0B/STAB1/RAC2/WNT7A/HLA-C/HLA-A/ACE2/TCIRG1/TLR2/RAB31/RAB43/AREG/HLA-H/CSF3R/CD163/CD207/MCOLN1/ENTPD7/TGFA/SCARF1/ATP6V0C/FZD4/CAV1/SGIP1/NOSTRIN/MSR1/RILP/UBB/EGF/HLA-G/SYT1/APOE	50
CC	GO:0098803	respiratory chain complex	28/3045	91/19869	0.000152175	0.00248552	0.00212867	NDUFB3/NDUFAF1/COX6A1/COX7A2/COX5B/NDUFA1/NDUFA2/NDUFB6/NDUFB1/NDUFC2-KCTD14/COX6B1/UQCR11/UQCR10/NDUFA4/COX7B/UQCRQ/NDUFS5/UQCRH/COX8A/COX6B2/NDUFA13/UQCRHL/NDUFS4/NDUFA7/UQCRB/C15orf48/NDUFB7/COX6C	28
CC	GO:0034506	chromosome, centromeric core domain	10/3045	19/19869	0.000171012	0.00273247	0.00234016	H4C8/H4C4/H2AC8/H4C11/H4C12/H4C5/CENPA/H2BC11/H4C9/H4C3	10
CC	GO:0033177	proton-transporting two-sector ATPase complex, proton-transporting domain	12/3045	26/19869	0.000192468	0.00300988	0.00257774	ATP6V0E1/ATP5MF/ATP5PF/ATP5MG/ATP6V0D1/ATP5PO/ATP5ME/ATP6V0B/RNASEK/TCIRG1/ATP8/ATP6V0C	12
CC	GO:0005871	kinesin complex	18/3045	49/19869	0.00019869	0.00304245	0.00260563	KIF3A/KIF5C/KIF1B/KIF21A/KIF18B/DISC1/KIFC3/KIF14/KIFC1/KIF5A/KIF11/KIF23/KIF20A/KIF3C/KIF15/KIF2C/KLC3/KIF18A	18
CC	GO:0016469	proton-transporting two-sector ATPase complex	18/3045	50/19869	0.000266376	0.00399564	0.00342197	ATP6V1E1/ATP6V0E1/ATP6V1D/ATP5MJ/ATP5MF/ATP5PF/ATP5F1C/ATP5MG/ATP6V0D1/ATP5PO/ATP5ME/ATP6V1F/ATP6V1C1/ATP6V0B/RNASEK/TCIRG1/ATP8/ATP6V0C	18
CC	GO:0070069	cytochrome complex	16/3045	42/19869	0.000274077	0.00402371	0.00344601	COX6A1/COX7A2/COX5B/COX6B1/UQCR11/UQCR10/NDUFA4/COX7B/UQCRQ/UQCRH/COX8A/COX6B2/UQCRHL/UQCRB/C15orf48/COX6C	16
CC	GO:0005746	mitochondrial respirasome	28/3045	94/19869	0.000279196	0.00402371	0.00344601	NDUFB3/RAB5IF/NDUFAF1/COX6A1/COX7A2/COX5B/NDUFA1/NDUFA2/NDUFB6/NDUFB1/NDUFC2-KCTD14/COX6B1/UQCR11/UQCR10/NDUFA4/COX7B/UQCRQ/NDUFS5/UQCRH/COX8A/NDUFA13/UQCRHL/NDUFS4/NDUFA7/UQCRB/C15orf48/NDUFB7/COX6C	28
CC	GO:0005581	collagen trimer	26/3045	86/19869	0.000351084	0.00496243	0.00424996	C1QC/C1QB/C1QA/MARCO/FCN1/EMILIN2/GLDN/COL5A1/COL19A1/COL17A1/COL6A2/FCN2/COL6A1/COL23A1/COL13A1/COL4A3/MSR1/COL1A2/COL7A1/C1QTNF7/COL5A3/COL9A3/COL1A1/EMID1/COL4A1/COL4A2	26
CC	GO:0031838	haptoglobin-hemoglobin complex	7/3045	11/19869	0.000367487	0.00509628	0.00436459	HP/HBM/HBD/HBB/HBQ1/HBG1/HBG2	7
CC	GO:0045335	phagocytic vesicle	37/3045	139/19869	0.00040618	0.00552857	0.00473481	ANXA3/ATP6V0E1/RAB32/RAB20/B2M/SNX3/NCF4/PGLYRP1/CYBA/CLEC4E/ATP6V0D1/STXBP4/SLC11A1/TAP1/ATP6V0B/RAC2/HLA-C/HLA-A/ZYX/TCIRG1/TLR2/RAB31/UNC93B1/RAB43/LTF/HLA-H/NCF1/MCOLN1/GSN/ADAM8/NOD2/MPO/ATP6V0C/PLD4/ELANE/RILP/HLA-G	37
CC	GO:0031225	anchored component of membrane	43/3045	169/19869	0.000419801	0.00561007	0.00480462	BST1/CD177/RECK/CD59/NT5E/NTNG2/VNN1/BST2/CD14/CD55/NRN1/PLAUR/RGMB/ALPL/FOLR3/CA4/VNN2/HYAL2/RGMA/TFPI/NCAM1/LY6G6C/MMP25/LY6E/OMG/ACHE/NOD2/GPC4/GAS1/ART4/CEACAM8/LYPD8/FCGR3B/CEACAM6/LYPD5/GPC3/EFNA5/CD24/CEACAM5/ENPP6/ITLN1/MSLN/DPEP1	43
CC	GO:0070469	respirasome	29/3045	101/19869	0.000434612	0.00570429	0.00488531	NDUFB3/RAB5IF/NDUFAF1/COX6A1/COX7A2/COX5B/NDUFA1/NDUFA2/NDUFB6/NDUFB1/NDUFC2-KCTD14/COX6B1/UQCR11/UQCR10/NDUFA4/COX7B/UQCRQ/NDUFS5/UQCRH/COX8A/COX6B2/NDUFA13/UQCRHL/NDUFS4/NDUFA7/UQCRB/C15orf48/NDUFB7/COX6C	29
CC	GO:0042383	sarcolemma	36/3045	136/19869	0.000540776	0.00697316	0.005972	AHNAK/ANXA1/FLOT1/DYSF/ANK3/SCN1B/TGFB3/STAC3/AHNAK2/OBSCN/STBD1/RTN2/FGF13/COL6A2/LAMA2/COL6A1/SLC8A2/SGCD/CDH2/BSG/PDE9A/KCNJ2/SCN2B/CAV1/AQP1/SLC2A1/TRIM72/STAC/SNTG2/RYR2/SLC2A5/NOS1AP/SLC2A4/BVES/CLCN1/SCN5A	36
CC	GO:0005774	vacuolar membrane	97/3045	461/19869	0.00057118	0.00723823	0.00619901	ATP6V1E1/TMEM59/BLOC1S1/CD63/LAPTM4A/ATP6V0E1/MGST1/LAMTOR5/ATP6V1D/IFITM1/NEU1/LRBA/GBA1/C3AR1/AHNAK/TRPM2/DRAM1/CTSA/FLOT1/BRI3/AP5B1/DPP4/STOM/JMY/ARL8A/CKAP4/LAMTOR1/CHMP5/VNN1/CTSD/IFITM3/SLC30A4/SORT1/BST2/GRN/SH3GLB1/GABARAPL2/FPR1/GABARAP/ATP6V0D1/TMEM150B/IFITM2/BORCS8/TOM1/LAMTOR2/VAPA/VPS13A/AP1S1/CUBN/ATP6V1F/ECE1/ATP6V1C1/AP2S1/CHMP2A/ATP6V0B/RNASEK/SLC9A4/GNB2/ABCD1/TCIRG1/NFAM1/MAR…	97
CC	GO:0061702	inflammasome complex	9/3045	18/19869	0.00059807	0.00745053	0.00638083	AIM2/NLRC4/CASP1/CASP4/CASP5/NAIP/PYCARD/GSDMD/NLRP6	9
CC	GO:0005765	lysosomal membrane	89/3045	418/19869	0.000637703	0.0076838	0.00658061	ATP6V1E1/TMEM59/BLOC1S1/CD63/LAPTM4A/ATP6V0E1/MGST1/LAMTOR5/ATP6V1D/IFITM1/NEU1/LRBA/GBA1/C3AR1/AHNAK/TRPM2/DRAM1/CTSA/FLOT1/BRI3/AP5B1/DPP4/STOM/ARL8A/CKAP4/LAMTOR1/CHMP5/VNN1/CTSD/IFITM3/SLC30A4/SORT1/BST2/GRN/FPR1/ATP6V0D1/IFITM2/BORCS8/TOM1/LAMTOR2/VAPA/VPS13A/AP1S1/CUBN/ATP6V1F/ECE1/ATP6V1C1/AP2S1/CHMP2A/ATP6V0B/RNASEK/GNB2/ABCD1/TCIRG1/NFAM1/MARCHF2/ENPP1/PCSK9/GPR137/HLA-H/CSF3R/MYO6/KPTN/…	89
CC	GO:0098852	lytic vacuole membrane	89/3045	418/19869	0.000637703	0.0076838	0.00658061	ATP6V1E1/TMEM59/BLOC1S1/CD63/LAPTM4A/ATP6V0E1/MGST1/LAMTOR5/ATP6V1D/IFITM1/NEU1/LRBA/GBA1/C3AR1/AHNAK/TRPM2/DRAM1/CTSA/FLOT1/BRI3/AP5B1/DPP4/STOM/ARL8A/CKAP4/LAMTOR1/CHMP5/VNN1/CTSD/IFITM3/SLC30A4/SORT1/BST2/GRN/FPR1/ATP6V0D1/IFITM2/BORCS8/TOM1/LAMTOR2/VAPA/VPS13A/AP1S1/CUBN/ATP6V1F/ECE1/ATP6V1C1/AP2S1/CHMP2A/ATP6V0B/RNASEK/GNB2/ABCD1/TCIRG1/NFAM1/MARCHF2/ENPP1/PCSK9/GPR137/HLA-H/CSF3R/MYO6/KPTN/…	89
CC	GO:0045177	apical part of cell	92/3045	435/19869	0.000656416	0.0077817	0.00666446	ATP6V1E1/PATJ/MYL12B/PTCH1/EDAR/LMO7/SLC22A4/ANXA1/CLIC5/TNIK/ABCB1/DPP4/KCNE1/CEACAM1/SLC38A1/CTSL/CTSB/BST2/CYBA/SLC16A3/DYNC2H1/ATP6V0D1/SLC26A6/SLC4A7/HPN/AJAP1/CUBN/SLC4A10/ATP6V1C1/CA4/PARD6B/HYAL2/SLC9A4/INSC/MUC1/IGFBP2/PLB1/ACE2/TRPV4/TCIRG1/FABP2/PRKG2/SHROOM4/HSP90AA1/KCNMA1/SLCO2B1/ERBB3/ECRG4/FAP/SLC7A5/EPB41L4B/DCHS1/KL/AQP10/MYO7A/CDH2/MGAM/SLC22A18/ENPP3/ATP1B2/SAPCD2/NHS/SLC22A1/…	92
CC	GO:0000940	outer kinetochore	7/3045	12/19869	0.000765113	0.00892632	0.00764474	SKA3/PLK1/SKA1/BUB1B/CCNB1/NDC80/CENPF	7
CC	GO:0030670	phagocytic vesicle membrane	23/3045	77/19869	0.000903495	0.0103761	0.00888635	ANXA3/ATP6V0E1/RAB32/RAB20/B2M/CYBA/CLEC4E/ATP6V0D1/SLC11A1/TAP1/ATP6V0B/RAC2/HLA-C/HLA-A/TCIRG1/TLR2/RAB31/RAB43/HLA-H/MCOLN1/ATP6V0C/RILP/HLA-G	23
CC	GO:0045171	intercellular bridge	25/3045	89/19869	0.00147321	0.0166586	0.0142669	SRA1/USB1/NUPR1/QSOX1/TUBB4B/RFXANK/PHLPP2/CDC6/NCAPH2/MICAL1/CYTH4/CEP55/GSTM3/KLHDC8B/OLFM4/TPX2/SKA1/TUBB3/KIF20A/CENPE/CHRNA2/CDCA8/NINL/TUBB2B/TUBB2A	25
CC	GO:0031617	NMS complex	6/3045	10/19869	0.00154851	0.0172447	0.0147688	SPC25/SPC24/ZWINT/NUF2/NDC80/KNL1	6
CC	GO:1990204	oxidoreductase complex	32/3045	125/19869	0.00193194	0.0211937	0.0181509	NDUFB3/NDUFAF1/NDUFA1/LDHA/NDUFA2/NDUFB6/NDUFB1/BCKDHB/NDUFC2-KCTD14/UQCR11/UQCR10/NCF4/NDUFA4/CYBA/MTARC1/UQCRQ/NDUFS5/RAC2/UQCRH/NCF1C/NCF1B/NDUFA13/UQCRHL/CYB5R3/RRM2/NDUFS4/NDUFA7/NCF1/UQCRB/NDUFB7/GMPR/GLDC	32
CC	GO:0001518	voltage-gated sodium channel complex	8/3045	17/19869	0.00199378	0.0215504	0.0184563	SCN1B/SCN9A/SCN3A/CACNA1I/CACNA1H/SCN2B/SCN4A/SCN5A	8
CC	GO:0031252	cell leading edge	86/3045	421/19869	0.00276742	0.029479	0.0252466	ABLIM1/PLEKHA1/AMOT/UNC5A/S100A6/ARPC3/CD177/RAB13/SRA1/ABI2/CAPG/THEM4/PTPRK/SPTBN1/SH3YL1/PTPN13/FLOT1/ILK/PLCG1/DPP4/BMX/JMY/GPER1/PHLDB2/SAMSN1/FGR/APBB1/FLOT2/AIF1/S100A11/MYO10/KANK1/DST/VASP/CDK5/RAC2/NME1/TRPV4/PLEK/PLCE1/PLEKHG5/ENAH/DLC1/FAP/DBN1/MYO6/TWF2/KPTN/FAM89B/ACTA2/APBB2/PARVA/GSN/WASF1/CLRN1/LDB2/MPP2/AKAP5/PDLIM7/FGD4/KLHL2/TLR4/CDH2/TUBB3/ADORA2A/CNTNAP2/NHS/PDE9A/TUBG1/RAPG…	86
CC	GO:0044853	plasma membrane raft	29/3045	113/19869	0.0029437	0.0309088	0.0264711	MS4A4A/PTCH1/CD177/FLOT1/ITGAM/FLOT2/HCK/CR1/CAVIN3/SELPLG/KCNMA1/BMPR1A/TFPI/ASAH2/DLC1/HMOX1/MAPK3/JAK2/CDH2/MS4A1/CAV1/MYOF/SLC2A1/PRTN3/EFNA5/NOS1AP/KIF18A/BVES/SCN5A	29
CC	GO:0031253	cell projection membrane	72/3045	344/19869	0.00312818	0.0323832	0.0277339	PLEKHA1/UNC5A/PTCH1/THEM4/SPTBN1/SH3YL1/PLCG1/DPP4/BMX/GPR37L1/GPER1/CNGB1/CEACAM1/TCTN2/FGR/AIF1/MYO10/KANK1/SLC26A6/TMEM67/BBS5/CUBN/VASP/S100P/CA4/CNGA4/CLTB/PHLPP2/ARL13A/NME1/PLB1/ACE2/TRPV4/PLEK/EHD1/HSP90AA1/ROM1/DLC1/FAP/MYO6/SLC7A5/MPP2/AKAP5/ADCY3/PKD2L1/MXRA8/ATP1B2/ADORA2A/CNTNAP2/PDE9A/SLC28A3/AQP1/TAS2R4/ABCG2/RIGI/SLC6A19/JCAD/HLA-G/IFIT5/EPHA2/MCHR1/ITGA8/SLC1A2/DDN/PDPN/PLEK2/ITL…	72
CC	GO:0030027	lamellipodium	46/3045	203/19869	0.0035558	0.0362988	0.0310873	ABLIM1/AMOT/ARPC3/CD177/RAB13/ABI2/CAPG/PTPN13/FLOT1/ILK/PLCG1/DPP4/APBB1/FLOT2/AIF1/MYO10/VASP/CDK5/RAC2/TRPV4/PLCE1/PLEKHG5/ENAH/FAP/DBN1/TWF2/KPTN/FAM89B/ACTA2/APBB2/PARVA/GSN/WASF1/CLRN1/FGD4/KLHL2/CDH2/TUBB3/NHS/RAPGEF3/ABLIM3/EPHA2/PDPN/PLEKHH2/SORBS2/PLEK2	46
CC	GO:0005874	microtubule	93/3045	466/19869	0.00388868	0.0391532	0.0335318	DYNLT1/MID2/KIF3A/CASP1/KIF24/HAUS4/KIF5C/DNAH17/CHMP5/TUBA1B/DNAH6/MTUS1/TUBA1C/RPGRIP1L/DST/HOOK1/DYNC2H1/GABARAP/PYCARD/TUBB4B/MAP9/CHMP2A/MAP7/KIF1B/TRIM55/CDK5/TUBA4A/FGF13/KIF21A/TRPV4/BIRC5/ARL6/PIERCE2/CDK1/AURKB/RMDN2/KIF4A/KIF18B/SKA3/DISC1/NCKAP5/TUBA1A/GTSE1/KIFC3/NCKAP5L/KIF14/FIGN/NUSAP1/KIFC1/TPPP/SYBU/MAP1LC3B2/MAP3K11/CAMSAP2/KIF5A/FAM110C/TPX2/TUBA4B/PLK1/AURKA/CDK5RAP2/SKA1/TUB…	93
CC	GO:0033176	proton-transporting V-type ATPase complex	10/3045	27/19869	0.0048346	0.0480194	0.0411251	ATP6V1E1/ATP6V0E1/ATP6V1D/ATP6V0D1/ATP6V1F/ATP6V1C1/ATP6V0B/RNASEK/TCIRG1/ATP6V0C	10
MF	GO:0003823	antigen binding	103/2877	171/18432	1.37985e-40	1.61718e-37	1.45247e-37	IL7R/FCN1/TAP1/HLA-C/HLA-A/TRAV29DV5/TRAV23DV6/FCN2/TRAV12-3/HLA-H/SLC7A5/LILRA2/TRAV12-1/TRAV19/TGFB1/CD1C/SIRPA/CD1E/TRAV12-2/TRGV9/TRAV8-4/IGHV6-1/IGKV1D-12/IGLV3-21/IGLV3-27/IGHG1/IGLV2-23/IGKV1D-39/IGLV2-11/IGHD/IGLV2-14/IGKV1-39/IGHV3-72/IGKV1D-33/IGKV3-15/IGHG4/IGLL5/IGLC2/IGLV3-25/IGLV3-1/IGKV3-20/IGKV2D-28/IGLC1/IGLV6-57/IGLV2-8/IGLV3-19/IGLC6/HLA-G/IGKV1-17/IGKV4-1/IGHV2-70D/IGHG3/IGKC/…	103
MF	GO:0034987	immunoglobulin receptor binding	56/2877	79/18432	4.84435e-28	2.83879e-25	2.54966e-25	CLEC4D/FGR/FES/TARM1/IGHV6-1/IGHG1/IGHD/IGHV3-72/IGHG4/IGLL5/IGLC2/IGLC1/IGLC6/IGHV2-70D/IGHG3/IGKC/IGHV3-64/IGHV1-45/IGLC3/JCHAIN/IGHV1-69/IGHA2/IGHV5-10-1/IGHV1-69D/IGHV1-18/IGHV1-24/IGHV3-33/IGHV2-70/IGHV3-74/IGHV3-23/IGHV3-30/IGHG2/IGHV3-64D/IGHA1/IGHV3-21/IGHV3-20/IGHV4-39/IGHV3-16/IGHV3-9/IGHV1-69-2/IGHV5-51/IGLC7/IGHV3-49/IGHV1-58/IGHV3-73/IGHV7-4-1/IGHV3-66/IGHV2-5/IGHV4-61/IGHV2-26/IGHV3…	56
MF	GO:0030527	structural constituent of chromatin	44/2877	99/18432	8.59277e-12	3.35691e-09	3.01501e-09	H2AC19/H2AC18/H2BC5/H3C4/H2BC21/H2BC12/H2AC7/H4C8/H4C4/H2AC20/H2BC18/H2AJ/H2AC8/H1-2/H2BC6/H3-5/H3-3B/H3-3A/H2AC13/H4C11/H4C12/H4C5/H2AC6/H2BC8/H2BC12L/CENPA/H3C14/H3C15/H2BC4/H3C10/H3C12/H2AC17/H1-0/H2AX/H2BC11/H1-6/H1-4/H2BC17/H2AC16/H3C13/H4C9/H4C3/H2BC7/H3C6	44
MF	GO:0140375	immune receptor activity	54/2877	148/18432	3.97263e-10	1.16398e-07	1.04543e-07	FCGR1A/FCGR1BP/IL7R/LILRA5/CCR6/FCER1G/IL10RB/C3AR1/CXCR5/CCR4/LILRA6/IFNGR2/CTSH/CCRL2/CR2/IL18RAP/FPR1/LILRB3/IFNGR1/IL15RA/IL18R1/IL11RA/IL1R2/IL4R/IL17RA/CR1/CSF2RA/CCR1/LILRB1/ACKR3/LILRB5/CD200R1/CSF3R/LILRA2/FCGR2B/CXCR1/HLA-DOA/CCR7/FPR2/IL22RA2/FZD4/IL1R1/KIR2DL4/IL23R/LILRA4/F3/CCR8/XCR1/GPR17/FLT3/PIGR/EBI3/IL1RL1/IL5RA	54
MF	GO:0008201	heparin binding	51/2877	171/18432	1.89615e-06	0.000444459	0.00039919	NELL2/FBLN7/PTCH1/LRPAP1/SELL/COL5A1/FGF9/PCOLCE2/PTPRS/FURIN/ADAMTS3/ADAMTS5/TGFBR3/ANG/LTF/CCN3/ANOS1/MDK/CCN2/CXCL10/AOC1/PRG2/ADAMTS1/SELP/PGF/CLEC3B/EFEMP2/MPO/COL23A1/PF4/COL13A1/FGFR2/APLP1/CCL8/CTSG/ELANE/NDNF/CXCL11/PF4V1/COL5A3/THBS1/SFRP1/AZU1/PCSK6/CCL7/POSTN/TENM1/CCL23/FBN1/PTPRF/APOE	51
MF	GO:0005539	glycosaminoglycan binding	64/2877	237/18432	4.45433e-06	0.000784821	0.000704887	NELL2/FBLN7/PTCH1/LRPAP1/SPOCK2/SEMA5A/SELL/PGLYRP1/TNFAIP6/GNS/COL5A1/FGF9/PCOLCE2/PTPRS/FURIN/STAB1/HYAL2/HMMR/ADAMTS3/ADAMTS5/TLR2/TGFBR3/ANG/LTF/CCN3/ANOS1/MDK/CCN2/CXCL10/AOC1/PRG2/ADAMTS1/NOD2/SELP/PGF/CLEC3B/EFEMP2/MPO/COL23A1/PF4/COL13A1/FGFR2/APLP1/CCL8/CTSG/ELANE/NDNF/CXCL11/LYVE1/PF4V1/COL5A3/THBS1/SFRP1/AZU1/PCSK6/JCHAIN/CCL7/POSTN/TENM1/AGRN/CCL23/FBN1/PTPRF/APOE	64
MF	GO:0046982	protein heterodimerization activity	85/2877	341/18432	4.6875e-06	0.000784821	0.000704887	H2AC19/H2AC18/MAFG/H2BC5/H3C4/H2BC21/H2BC12/BCL2A1/H2AC7/ABTB3/H4C8/GADD45A/H4C4/H2AC20/H2BC18/RALGAPA1/POLE4/BCL2/H2AJ/EXT1/H2AC8/CEBPB/SUPT3H/SLC51A/CYBA/CENPW/ABCD2/VAPA/H2BC6/H3-5/H3-3B/H3-3A/JDP2/IRAK3/DRAP1/BAK1/H2AC13/PDSS1/H4C11/ABCD1/GCA/H4C12/H4C5/H2AC6/ERBB3/H2BC8/ATF3/RALGAPA2/H2BC12L/CENPA/H3C14/TOP2A/H3C15/APOA2/H2BC4/H3C10/AURKA/H3C12/H2AC17/TLR4/EPAS1/ATP1B2/H2AX/FZD4/H2BC11/SIM2/…	85
MF	GO:0004896	cytokine receptor activity	33/2877	97/18432	5.72793e-06	0.000839142	0.000753675	IL7R/CCR6/IL10RB/CXCR5/CCR4/IFNGR2/CCRL2/IL18RAP/IFNGR1/IL15RA/IL18R1/IL11RA/IL1R2/IL4R/IL17RA/CSF2RA/CCR1/ACKR3/CSF3R/CXCR1/CCR7/IL22RA2/FZD4/IL1R1/IL23R/F3/CCR8/XCR1/GPR17/FLT3/EBI3/IL1RL1/IL5RA	33
MF	GO:0019865	immunoglobulin binding	13/2877	24/18432	1.44429e-05	0.00180993	0.00162559	FCGR1A/FCGR1BP/FCER1G/FCAR/FCGR2A/LILRA2/FCGR2B/LGALS3/CD22/MS4A1/FCGR3B/JCHAIN/MS4A2	13
MF	GO:0019838	growth factor binding	40/2877	132/18432	1.54431e-05	0.00180993	0.00162559	ACVR2B/ITGA6/SEC61B/ACVRL1/SORT1/RHBDF2/TGFB3/ACVR1C/IL1RN/COL5A1/IL11RA/IL1R2/ACVR1B/FURIN/HYAL2/IGFBP2/TGFBR3/ERBB3/IGFBP3/CCN2/FLT4/KL/COL6A1/IL1R1/NLRP7/FSTL4/FGFR2/COL1A2/FLT3/THBS1/HTRA1/PCSK6/NTRK3/EPHA2/COL1A1/WFIKKN1/COL4A1/KAZALD1/SCN5A/RHBDF1	40
MF	GO:0030246	carbohydrate binding	68/2877	275/18432	5.25799e-05	0.00508967	0.00457129	HK3/FBXO6/GALNT12/LGALS1/CLEC4D/ASGR2/CLEC5A/GALNT13/GALNT14/SLC2A3/LMAN2/SELL/SIGLEC5/SIGLEC16/CLEC4E/FCN1/PYGL/SIGLEC9/PLOD1/GCKR/STBD1/GALK1/HKDC1/PPP1R3D/GALNT2/ALDOA/CLEC1B/CLEC6A/DBH/ASGR1/SIGLEC11/ALPK1/ENPP1/FCN2/LGALS9/PTX3/CD207/CLEC2B/PPP1R3B/CLEC4G/OLR1/GALNT3/PRG2/SIGLEC6/SIGLEC1/SELP/CLEC3B/MGAM/SIGLEC14/PRG3/CLEC18C/GALM/PLOD2/LGALS3/CD22/BSG/CLEC11A/CD248/P4HA2/CLEC18B/C4B/GALNT5/…	68
MF	GO:0002020	protease binding	40/2877	139/18432	5.72832e-05	0.00508967	0.00457129	CD177/NLRC4/CSTA/CARD16/NOL3/FLOT1/DPP4/CSTB/TIMP1/BCL2/CD28/SELL/FADD/SERPINA1/CARD17P/INSL3/PYCARD/UBC/ATP9A/ADAMTSL4/FURIN/FAM20C/TIMP4/ADAMTS4/FAP/KIT/RHBDD2/PINK1/IL1R1/RIOK3/PRKN/NLRP7/ECM1/CTSG/F3/ELANE/COL1A2/COL1A1/BDKRB2/TIMP3	40
MF	GO:0008017	microtubule binding	67/2877	271/18432	5.97624e-05	0.00508967	0.00457129	S100A9/S100A8/MID2/GAPDH/KIF3A/ALMS1/KIF24/HAUS4/KIF5C/JMY/STARD9/FES/MTUS1/GABARAPL2/DST/HOOK1/GABARAP/VAPA/MAP9/KIF1B/DLGAP5/FGF13/CEP295NL/KIF21A/TRPV4/BIRC5/NME8/RMDN2/KIF4A/JAKMIP2/STRBP/KIF18B/GTSE1/KIFC3/KIF14/NUSAP1/KIFC1/TPPP/MAP1LC3B2/CAMSAP2/KIF5A/TPX2/PLK1/SPC24/CDK5RAP2/SKA1/KIF11/KIF23/KIF20A/KIF3C/GAS2L1/FHDC1/KIF15/KIF2C/CENPE/SGIP1/MX1/GJB6/NEFM/SPAG5/CAMSAP3/TPGS1/KLC3/CENPF/REE…	67
MF	GO:0019955	cytokine binding	41/2877	144/18432	6.07981e-05	0.00508967	0.00457129	NOG/CCR6/CXCR5/PLP2/CCR4/CCRL2/ACVRL1/TGFB3/IFNGR1/IL1RN/IL18R1/IL11RA/IL1R2/ZFP36/HYAL2/CSF2RA/CCR1/TNFRSF1A/TGFBR3/BMPR1A/ACKR3/CSF3R/KIT/GBP1/CXCR1/CCR7/IL22RA2/FZD4/IL1R1/NLRP7/IL23R/ELANE/CCR8/XCR1/THBS1/ACKR1/EBI3/PDPN/IL1RL1/IL5RA/WFIKKN1	41
MF	GO:0019957	C-C chemokine binding	12/2877	24/18432	8.73378e-05	0.006824	0.00612897	CCR6/CXCR5/CCR4/CCRL2/ZFP36/CCR1/ACKR3/CXCR1/CCR7/CCR8/XCR1/ACKR1	12
MF	GO:0003777	microtubule motor activity	23/2877	67/18432	0.000122833	0.00899749	0.00808109	KIF3A/KIF24/KIF5C/DNAH17/STARD9/DNAH6/DYNC2H1/KIF1B/KIF21A/KIF4A/KIF18B/KIFC3/KIF14/KIFC1/KIF5A/KIF11/KIF23/KIF20A/KIF3C/KIF15/KIF2C/CENPE/KIF18A	23
MF	GO:0061134	peptidase regulator activity	58/2877	232/18432	0.000131149	0.00904158	0.0081207	GAPDH/NLRC4/CST7/CASP1/RECK/CSTA/SERPINB1/CARD16/NOL3/SLPI/GAS6/CSTB/SPOCK2/TIMP1/CTSH/NAIP/BST2/SERPINB10/SERPINA1/CARD17P/PRDX5/PSENEN/SERPINB2/PYCARD/PCOLCE2/FURIN/NKX3-1/VSIR/TIMP4/SERPING1/RENBP/BIRC5/BAD/NLRP12/TFPI/ST20/LTF/PTTG1/WFDC1/ANOS1/PSME2/PINK1/SPINK8/NLRP7/PROS1/COL4A3/CAV1/C4B/C4A/COL7A1/GPC3/SNCA/PI3/SPINK9/WFIKKN1/PCSK1N/TIMP3/DPEP1	58
MF	GO:0033691	sialic acid binding	11/2877	22/18432	0.000173035	0.0107767	0.00967907	SIGLEC5/SIGLEC16/FCN1/SIGLEC9/SIGLEC11/SIGLEC6/SELP/SIGLEC14/CD22/AGRN/SIGLEC12	11
MF	GO:1901681	sulfur compound binding	65/2877	270/18432	0.000174707	0.0107767	0.00967907	NELL2/FBLN7/PTCH1/LRPAP1/DBI/SEMA5A/SELL/GNS/GAL3ST4/COL5A1/FGF9/PCOLCE2/PTPRS/FURIN/P2RX1/ADAMTS3/ADAMTS5/TGFBR3/ANG/ENPP1/GSTM3/LTF/CCN3/TKT/ANOS1/MDK/CBS/CCN2/LOC102724560/CXCL10/AOC1/PRG2/ADAMTS1/SELP/PGF/CLEC3B/EFEMP2/MPO/COL23A1/PF4/COL13A1/FGFR2/APLP1/CCL8/CTSG/ELANE/ACBD7/NDNF/CXCL11/PF4V1/COL5A3/THBS1/SFRP1/AZU1/PCSK6/PTGES/CCL7/POSTN/RYR2/TENM1/AGRN/CCL23/FBN1/PTPRF/APOE	65
MF	GO:0070003	threonine-type peptidase activity	10/2877	19/18432	0.00019992	0.0109152	0.00980348	PSMB8/PSMB6/TASP1/GGT1/GGTLC2/PSMB9/GGT3P/PSMB10/PRSS50/GGT5	10
MF	GO:0038024	cargo receptor activity	26/2877	82/18432	0.000202679	0.0109152	0.00980348	SCART1/ASGR2/ITGAM/MARCO/CUBN/CD5/STBD1/LRP10/STAB1/HMMR/ASGR1/ENPP1/CXCL16/ACKR3/APOBR/CD163/OLR1/SDC1/SCARF1/LGALS3BP/SSC4D/MSR1/CD163L1/LYVE1/TMPRSS2/TFR2	26
MF	GO:0019956	chemokine binding	14/2877	33/18432	0.000211487	0.0109152	0.00980348	CCR6/CXCR5/PLP2/CCR4/CCRL2/ZFP36/CCR1/ACKR3/CXCR1/CCR7/CCR8/XCR1/ACKR1/PDPN	14
MF	GO:0089720	caspase binding	8/2877	13/18432	0.000214206	0.0109152	0.00980348	NLRC4/CARD16/NOL3/FADD/CARD17P/RIOK3/NLRP7/CTSG	8
MF	GO:0008009	chemokine activity	18/2877	49/18432	0.000250977	0.012256	0.0110077	CKLF/CCL28/PPBP/CXCL16/CCL24/CXCL10/PF4/CCL8/CCL2/CCL25/CXCL11/PF4V1/CXCL12/CCL7/CCL23/CXCL9/CCL18/CCL20	18
MF	GO:0038187	pattern recognition receptor activity	12/2877	27/18432	0.000355189	0.0164114	0.0147399	LY96/CLEC4D/MARCO/CD14/PGLYRP1/CLEC4E/FCN1/CLEC6A/TLR2/NOD2/TLR4/NLRP6	12
MF	GO:0048018	receptor ligand activity	105/2877	491/18432	0.000364075	0.0164114	0.0147399	HMGB2/IL10/ADM/CD40LG/CKLF/CCL28/GMFG/LRPAP1/IL18/GAS6/OSM/DPP4/TIMP1/SEMA5A/IL27/RETN/TNFSF10/TNFSF13B/GRN/SEMA6B/TNFSF13/TGFB3/INSL3/TYMP/SEMA4A/SECTM1/IL1RN/FGF9/WNT7A/CMTM1/METRNL/IL24/FGF13/ERFE/MANF/VSTM1/PPBP/CXCL16/GDF15/CMTM5/PDGFD/AREG/CCN3/IL1B/TG/CMTM2/PRL/IL19/HGF/NAMPT/CCL24/MDK/TGFA/OSGIN1/PDYN/TGFB1/CCN2/CXCL10/KL/SEMA3B/PGF/PF4/ADM2/LGALS3/INHBA/CLEC11A/TAFA5/CCL8/CTSG/TAFA1/WNT1…	105
MF	GO:0008574	plus-end-directed microtubule motor activity	9/2877	17/18432	0.000398453	0.0165255	0.0148424	KIF3A/KIF5C/KIF1B/KIF18B/KIF14/KIF5A/KIF11/CENPE/KIF18A	9
MF	GO:0005319	lipid transporter activity	42/2877	161/18432	0.000407663	0.0165255	0.0148424	PLSCR1/PRELID1/TMEM30B/GM2A/ABCB1/TNFAIP8L3/CEACAM1/PLTP/ATP8B2/TSPO/GRAMD1A/SLC51A/FABP5/ABCD2/ATP8A2/ATP9A/STARD4/PCTP/NPC2/CETP/ATG9A/ABCD1/FABP2/SLCO2B1/RBP4/PLSCR4/PLSCR2/GRAMD1C/APOA2/ATP8B4/GRAMD1B/ABCA13/SLC2A1/OSBPL10/OSBP2/MFSD2B/ABCB11/OSBPL6/SLC27A2/FABP4/APOE/APOD	42
MF	GO:0030546	signaling receptor activator activity	106/2877	498/18432	0.000408908	0.0165255	0.0148424	HMGB2/IL10/ADM/CD40LG/CKLF/CCL28/GMFG/LRPAP1/IL18/GAS6/OSM/DPP4/TIMP1/SEMA5A/IL27/RETN/TNFSF10/TNFSF13B/GRN/SEMA6B/TNFSF13/TGFB3/INSL3/TYMP/SEMA4A/SECTM1/IL1RN/FGF9/CDK5/WNT7A/CMTM1/METRNL/IL24/FGF13/ERFE/MANF/VSTM1/PPBP/CXCL16/GDF15/CMTM5/PDGFD/AREG/CCN3/IL1B/TG/CMTM2/PRL/IL19/HGF/NAMPT/CCL24/MDK/TGFA/OSGIN1/PDYN/TGFB1/CCN2/CXCL10/KL/SEMA3B/PGF/PF4/ADM2/LGALS3/INHBA/CLEC11A/TAFA5/CCL8/CTSG/TAFA1…	106
MF	GO:0140272	exogenous protein binding	24/2877	78/18432	0.00057386	0.0224188	0.0201354	PLSCR1/CLEC5A/DPP4/CDHR3/CR2/NECTIN2/CD55/CR1/HYAL2/HAVCR1/ICAM1/ACE2/SELPLG/HSPA1B/CDK1/CLDN9/NCAM1/HSPA1A/GYPA/CLEC4G/SLC1A5/BSG/EPHA2/ALB	24
MF	GO:0032934	sterol binding	20/2877	61/18432	0.000656659	0.0248259	0.0222974	PTCH1/RORA/TSPO/GRAMD1A/ERLIN1/STARD4/GPR183/NPC2/CETP/RORC/GRAMD1C/NR1H3/APOA2/GRAMD1B/CAV1/TSPO2/OSBPL10/OSBP2/OSBPL6/APOD	20
MF	GO:0005125	cytokine activity	56/2877	237/18432	0.000766365	0.0263003	0.0236216	IL10/CD40LG/CKLF/CCL28/IL18/OSM/TIMP1/IL27/TNFSF10/TNFSF13B/GRN/TNFSF13/TGFB3/SECTM1/IL1RN/WNT7A/CMTM1/IL24/VSTM1/PPBP/CXCL16/GDF15/CMTM5/AREG/IL1B/CMTM2/IL19/NAMPT/CCL24/TGFB1/CXCL10/PF4/INHBA/TAFA5/CCL8/WNT11/CCL2/CCL25/CXCL11/PF4V1/EBI3/CXCL12/INHBB/IL26/LIF/CCL7/IL1A/CCL23/CXCL9/CTF1/IL33/WNT9A/CCL18/FAM3B/IL21/CCL20	56
MF	GO:0036041	long-chain fatty acid binding	8/2877	15/18432	0.000797974	0.0263003	0.0236216	S100A9/S100A8/PPARG/ALOX5AP/FABP2/OXER1/RIDA/FABP4	8
MF	GO:0030020	extracellular matrix structural constituent conferring tensile strength	15/2877	41/18432	0.000849056	0.0263003	0.0236216	COL5A1/COL19A1/COL17A1/COL6A2/COL6A1/COL23A1/COL13A1/COL4A3/COL1A2/COL7A1/COL5A3/COL9A3/COL1A1/COL4A1/COL4A2	15
MF	GO:0042605	peptide antigen binding	14/2877	37/18432	0.000852835	0.0263003	0.0236216	TAP1/HLA-C/HLA-A/TRAV29DV5/TRAV23DV6/TRAV12-3/HLA-H/SLC7A5/TRAV12-1/TRAV19/TRAV12-2/TRGV9/TRAV8-4/HLA-G	14
MF	GO:0032396	inhibitory MHC class I receptor activity	7/2877	12/18432	0.000857381	0.0263003	0.0236216	LILRA5/LILRA6/LILRB3/LILRB1/LILRB5/LILRA2/LILRA4	7
MF	GO:0042379	chemokine receptor binding	22/2877	71/18432	0.000861001	0.0263003	0.0236216	CNIH4/CKLF/CCL28/CCRL2/PPBP/CXCL16/CCL24/CXCL10/DEFB1/PF4/CCL8/NES/CCL2/CCL25/CXCL11/PF4V1/CXCL12/CCL7/CCL23/CXCL9/CCL18/CCL20	22
MF	GO:0015106	bicarbonate transmembrane transporter activity	10/2877	22/18432	0.000892008	0.0263003	0.0236216	SLC26A8/SLC26A6/SLC4A7/SLC4A10/BEST1/SLC4A4/SLC4A3/SLC4A9/SLC39A8/SLC4A1	10
MF	GO:0120020	cholesterol transfer activity	10/2877	22/18432	0.000892008	0.0263003	0.0236216	PLTP/TSPO/GRAMD1A/STARD4/NPC2/CETP/GRAMD1C/APOA2/GRAMD1B/APOE	10
MF	GO:0004175	endopeptidase activity	91/2877	426/18432	0.000897623	0.0263003	0.0236216	ADAMTS12/TMEM59/HP/PSMA6/HPR/TRABD2A/CASP1/CASP4/CTSZ/CASP5/DPP4/CTSH/ADAM22/ADAM23/CTSD/PSMB8/CTSL/CTSB/USP13/PSMB6/MMP9/MMP8/TASP1/ST14/IMMP2L/PYCARD/C2/HPN/C1RL/ECE1/ADAM9/ADAM28/FURIN/ADAM12/PSMB9/MMP27/ADAMTS3/ADAMTS5/ACE2/CFB/ADAMTS4/F12/PCSK9/LTF/FAP/MMP25/ADAMTS10/RHBDD2/CAPN13/MMP28/PRSS36/ASPRV1/ADGB/UCHL1/ADAMTS2/PRSS23/ADAM8/ADAMTS17/C1R/ADAMTS1/ESPL1/PLAU/ADGRG6/USP18/PSMB10/PRSS50/M…	91
MF	GO:0016209	antioxidant activity	25/2877	85/18432	0.000932725	0.0266623	0.0239467	GSTO1/TXN/S100A9/HP/MGST1/TXNDC17/PRDX1/ALOX5AP/PRDX5/PRDX4/CLIC2/TXNRD3/GPX1/MPO/HBM/PRDX2/PTGES/HBD/ALB/HBB/LPO/APOE/HBQ1/HBG1/HBG2	25
MF	GO:0001637	G protein-coupled chemoattractant receptor activity	11/2877	26/18432	0.00103498	0.0282093	0.0253361	CCR6/CXCR5/CCR4/CCRL2/CCR1/ACKR3/CXCR1/CCR7/CCR8/XCR1/GPR17	11
MF	GO:0004950	chemokine receptor activity	11/2877	26/18432	0.00103498	0.0282093	0.0253361	CCR6/CXCR5/CCR4/CCRL2/CCR1/ACKR3/CXCR1/CCR7/CCR8/XCR1/GPR17	11
MF	GO:0061135	endopeptidase regulator activity	47/2877	194/18432	0.00111738	0.029763	0.0267316	GAPDH/NLRC4/CST7/RECK/CSTA/SERPINB1/CARD16/NOL3/SLPI/GAS6/CSTB/SPOCK2/TIMP1/NAIP/BST2/SERPINB10/SERPINA1/CARD17P/PRDX5/PSENEN/SERPINB2/FURIN/VSIR/TIMP4/SERPING1/RENBP/BIRC5/TFPI/LTF/PTTG1/WFDC1/ANOS1/PSME2/SPINK8/NLRP7/PROS1/COL4A3/C4B/C4A/COL7A1/SNCA/PI3/SPINK9/WFIKKN1/PCSK1N/TIMP3/DPEP1	47
MF	GO:0001618	virus receptor activity	23/2877	77/18432	0.00116403	0.0303164	0.0272287	PLSCR1/CLEC5A/DPP4/CDHR3/CR2/NECTIN2/CD55/CR1/HYAL2/HAVCR1/ICAM1/ACE2/SELPLG/HSPA1B/CDK1/CLDN9/NCAM1/HSPA1A/GYPA/CLEC4G/SLC1A5/BSG/EPHA2	23
MF	GO:0004601	peroxidase activity	18/2877	55/18432	0.0012293	0.0313204	0.0281304	MGST1/TXNDC17/PRDX1/ALOX5AP/PRDX5/PRDX4/CLIC2/GPX1/MPO/HBM/PRDX2/PTGES/HBD/HBB/LPO/HBQ1/HBG1/HBG2	18
MF	GO:0015485	cholesterol binding	17/2877	51/18432	0.00132385	0.0323077	0.0290172	PTCH1/TSPO/GRAMD1A/ERLIN1/STARD4/NPC2/CETP/GRAMD1C/NR1H3/APOA2/GRAMD1B/CAV1/TSPO2/OSBPL10/OSBP2/OSBPL6/APOD	17
MF	GO:0016493	C-C chemokine receptor activity	10/2877	23/18432	0.00135894	0.0323077	0.0290172	CCR6/CXCR5/CCR4/CCRL2/CCR1/ACKR3/CXCR1/CCR7/CCR8/XCR1	10
MF	GO:0120015	sterol transfer activity	10/2877	23/18432	0.00135894	0.0323077	0.0290172	PLTP/TSPO/GRAMD1A/STARD4/NPC2/CETP/GRAMD1C/APOA2/GRAMD1B/APOE	10
MF	GO:0008191	metalloendopeptidase inhibitor activity	8/2877	16/18432	0.00137832	0.0323077	0.0290172	RECK/SPOCK2/TIMP1/BST2/TIMP4/COL4A3/WFIKKN1/TIMP3	8
MF	GO:0003774	cytoskeletal motor activity	30/2877	111/18432	0.00140985	0.032399	0.0290991	MYL6/KIF3A/KIF24/MYL6B/KIF5C/DNAH17/STARD9/DNAH6/MYO10/DYNC2H1/KIF1B/KIF21A/KIF4A/KIF18B/MYO6/KIFC3/KIF14/KIFC1/KIF5A/MYO7A/KIF11/KIF23/KIF20A/KIF3C/KIF15/KIF2C/CENPE/MYO7B/MYO16/KIF18A	30
MF	GO:0008378	galactosyltransferase activity	12/2877	31/18432	0.00157064	0.0353999	0.0317944	C1GALT1C1/B4GALT5/COLGALT2/B3GALT4/B3GALT2/B3GNT8/B3GALNT1/A3GALT2/B3GNT5/B3GNT3/B4GALT2/A4GALT	12
MF	GO:0015643	toxic substance binding	6/2877	10/18432	0.00170912	0.0357695	0.0321263	EPHX2/GUCY2C/ASS1/AZU1/ALB/A4GALT	6
MF	GO:0016671	oxidoreductase activity, acting on a sulfur group of donors, disulfide as acceptor	6/2877	10/18432	0.00170912	0.0357695	0.0321263	GLRX/IFI30/MSRB2/MSRB1/MSRA/MSRB3	6
MF	GO:0031720	haptoglobin binding	6/2877	10/18432	0.00170912	0.0357695	0.0321263	HBM/HBD/HBB/HBQ1/HBG1/HBG2	6
MF	GO:0050786	RAGE receptor binding	6/2877	10/18432	0.00170912	0.0357695	0.0321263	S100A9/S100A8/S100A12/HMGB2/FPR1/S100A4	6
MF	GO:0016684	oxidoreductase activity, acting on peroxide as acceptor	18/2877	57/18432	0.00194122	0.03978	0.0357284	MGST1/TXNDC17/PRDX1/ALOX5AP/PRDX5/PRDX4/CLIC2/GPX1/MPO/HBM/PRDX2/PTGES/HBD/HBB/LPO/HBQ1/HBG1/HBG2	18
MF	GO:0043028	cysteine-type endopeptidase regulator activity involved in apoptotic process	14/2877	40/18432	0.00204736	0.03978	0.0357284	CASP1/NOL3/GAS6/CTSH/NAIP/PRDX5/PYCARD/NKX3-1/BIRC5/BAD/NLRP12/ST20/SNCA/DPEP1	14
MF	GO:0015248	sterol transporter activity	13/2877	36/18432	0.00212598	0.03978	0.0357284	PLTP/TSPO/GRAMD1A/STARD4/NPC2/CETP/GRAMD1C/APOA2/GRAMD1B/OSBPL10/OSBP2/OSBPL6/APOE	13
MF	GO:0043394	proteoglycan binding	13/2877	36/18432	0.00212598	0.03978	0.0357284	FBLN7/SEMA5A/CTSL/CTSB/COL5A1/PTPRS/FCN2/COL5A3/THBS1/AZU1/AGRN/PTPRF/APOE	13
MF	GO:0035250	UDP-galactosyltransferase activity	11/2877	28/18432	0.00212903	0.03978	0.0357284	B4GALT5/COLGALT2/B3GALT4/B3GALT2/B3GNT8/B3GALNT1/A3GALT2/B3GNT5/B3GNT3/B4GALT2/A4GALT	11
MF	GO:0043236	laminin binding	11/2877	28/18432	0.00212903	0.03978	0.0357284	ITGA7/LGALS1/NTN4/ADAM9/ACHE/ADGRG6/LGALS3/ECM1/BCAM/THBS1/AGRN	11
MF	GO:0004252	serine-type endopeptidase activity	42/2877	174/18432	0.00213835	0.03978	0.0357284	HP/HPR/DPP4/CTSH/MMP9/MMP8/ST14/IMMP2L/C2/HPN/C1RL/FURIN/CFB/F12/PCSK9/LTF/FAP/RHBDD2/PRSS36/PRSS23/ADAM8/C1R/PLAU/PRSS50/MMP14/MMP2/HTRA3/MMP1/SEC11C/CTSG/F3/ELANE/PRTN3/CFD/PRSS27/CTRC/PRSS37/HTRA1/AZU1/PCSK6/TMPRSS2/KLK2	42
MF	GO:0032393	MHC class I receptor activity	8/2877	17/18432	0.00224931	0.0405567	0.036426	LILRA5/LILRA6/CTSH/LILRB3/LILRB1/LILRB5/LILRA2/LILRA4	8
MF	GO:0046933	proton-transporting ATP synthase activity, rotational mechanism	8/2877	17/18432	0.00224931	0.0405567	0.036426	ATP5MF/ATP5PF/ATP5F1C/ATP5MG/ATP5PO/ATP5ME/ATP8/ATP6V0C	8
MF	GO:0004866	endopeptidase inhibitor activity	43/2877	180/18432	0.00235674	0.04185	0.0375876	GAPDH/CST7/RECK/CSTA/SERPINB1/CARD16/NOL3/SLPI/GAS6/CSTB/SPOCK2/TIMP1/NAIP/BST2/SERPINB10/SERPINA1/CARD17P/PRDX5/SERPINB2/FURIN/TIMP4/SERPING1/RENBP/BIRC5/TFPI/LTF/PTTG1/WFDC1/ANOS1/SPINK8/NLRP7/PROS1/COL4A3/C4B/C4A/COL7A1/SNCA/PI3/SPINK9/WFIKKN1/PCSK1N/TIMP3/DPEP1	43
MF	GO:0004089	carbonate dehydratase activity	7/2877	14/18432	0.00278416	0.048702	0.0437417	CA5B/CA4/CA12/CA1/CA6/CA2/CA3	7
MF	GO:0030414	peptidase inhibitor activity	44/2877	187/18432	0.00287714	0.0495884	0.0445378	GAPDH/CST7/RECK/CSTA/SERPINB1/CARD16/NOL3/SLPI/GAS6/CSTB/SPOCK2/TIMP1/NAIP/BST2/SERPINB10/SERPINA1/CARD17P/PRDX5/SERPINB2/FURIN/TIMP4/SERPING1/RENBP/BIRC5/TFPI/LTF/PTTG1/WFDC1/ANOS1/SPINK8/NLRP7/PROS1/COL4A3/C4B/C4A/COL7A1/GPC3/SNCA/PI3/SPINK9/WFIKKN1/PCSK1N/TIMP3/DPEP1	44
BP, biological process; MF, molecular function; CC, cellular process
